# Supplementary material for: The synergistic effect of concatenation in phylogenomics: the case in Pantoea
Source: PeerJ. 2019 Apr 16;7:e6698. doi: 10.7717/peerj.6698 (PMC6474361; doi:10.7717/peerj.6698)
Supplement: File S5 — Nucleotide positions with conflicting signal as determined from the NeighborNet. [file peerj-07-6698-s011.xlsx]

## Sheet: P_ananatis_lineage
Supplementary File S5.1 Nucleotide sites within the concatenated alignment causing conflicting species relationships for the P. ananatis lineage
(P. allii, P. stewartii stewartii, P. stewartii indologenes)	Gene number	(P. ananatis, P. agglomerans lineage, P. septica, P. dispersa lineage)	Gene number	(P. allii, P. ananatis, P. brenneri)	Gene number	(P. ananatis, P. allii, P. brenneri, P. conspicua, P. anthophila, P. vagans, P. agglomerans)	Gene number	(P. ananatis, P. allii, P. agglomerans lineage, P. septica, P. dispersa lineage)	Gene number	(P. stewartii stewartii, P. stewartii indologenes, Tatumella, Erwinia)	Gene number	(P. allii, P. stewartii stewartii)	Gene number	(P. stewartii stewartii, P. allii, P. ananatis, P. brenneri)	Gene number	(P. stewartii stewartii, P. allii, P. ananatis, P. agglomerans lineage, P. septica)	Gene number
525	966	33762	506	5744	852	33049	506	30	966	25870	599	57644	823	75681	479	37827	809		Genes that have undergone recombination
780	966	37827	809	7943	1089	37693	809	18978	969	28958	704	191669	180	75683	479	37847	809
3621	12	37847	809	16300	377	37828	809	25987	599	29989	1074	226978	1291	176326	250	37848	809
3773	12	37849	809	16468	377	40179	53	33049	506	33049	506	245727	202	194729	925	37849	809
3860	12	47502	1276	33049	506	56702	823	34814	692	37827	809	260352	1143	249816	1218	47502	1276
4595	12	47503	1276	37940	809	75681	479	37827	809	37847	809	266894	1056	339454	556	47503	1276
6014	1336	57831	790	38814	997	75683	479	37847	809	37848	809	331217	1268	422901	285	57831	790
6725	1336	57832	790	39499	409	82993	1294	37848	809	37849	809	339454	556	423346	1312	57832	790
7319	1336	62949	455	57866	790	82998	1294	37849	809	37868	809	405969	28	423347	1312	66471	837
7493	1336	62951	455	70664	87	113192	1068	46251	1007	37869	809	418621	436	679997	504	75681	479
9320	937	66471	837	70808	87	194729	925	47502	1276	38540	997	420154	251	679998	504	75683	479
16127	377	75681	479	71492	406	219191	863	47503	1276	43973	1190	423168	1312	705976	1126	141262	464
16599	377	75683	479	75681	479	230702	291	57831	790	45538	119	423257	1312	772944	617	141263	464
17077	278	82995	1294	75683	479	242947	554	57832	790	47502	1276	423346	1312	772952	617	144951	830
17102	278	141262	464	82993	1294	245709	202	65693	435	47503	1276	423347	1312	772953	617	187792	832
17698	878	141263	464	82998	1294	249816	1218	66471	837	52031	353	423414	1312	772954	617	194729	925
17958	878	144951	830	85626	1253	270748	183	75681	479	57831	790	423625	1312	772955	617	220444	777
18066	878	168820	182	92844	10	282070	263	75683	479	57832	790	423626	1312	772964	617	221741	1338
18069	878	194729	925	120439	843	310829	22	82993	1294	64330	642	492885	1249			249816	1218
18815	336	245788	202	159458	1247	327721	621	82998	1294	64687	642	493133	714			310620	22
19175	969	245790	202	167312	1023	327723	621	83469	1096	66398	837	493174	714			310621	22
19629	969	249816	357	170502	1202	332843	1078	83536	1096	66471	837	493838	29			310829	22
22965	37	297857	132	174022	155	339296	556	95945	879	67592	630	494334	1117			327721	621
23183	37	310620	22	193697	1214	339454	556	120192	843	67596	630	500122	1217			327723	621
24023	1327	310621	22	194729	925	348271	131	120999	1002	73231	406	500132	1217			339296	556
24533	627	310829	22	213720	1148	420269	251	141262	464	75681	479	505538	1137			390649	733
26207	1121	327687	621	245034	242	423348	1312	141263	464	75683	479	555297	926			390800	733
26222	1121	327721	621	246678	1076	484447	888	144951	830	75884	479	557121	1269			423346	1312
26558	1121	327723	621	249816	1218	504496	255	187792	832	76862	312	563003	296			423347	1312
26852	1121	339296	556	256203	141	504497	255	194729	925	77145	312	577792	321			493785	29
27930	1207	339417	556	259191	1104	520845	1006	200131	898	77146	312	609802	1018			493786	29
28703	704	339418	556	269199	989	569766	259	201461	695	82993	1294	679822	504			494492	142
29063	1074	339420	556	281341	524	589131	766	203355	653	82998	1294	679997	504			500091	1217
29186	1074	339421	556	309523	1102	620189	379	207115	788	83383	1294	679998	504			525030	550
29466	1074	339422	556	318806	939	620503	379	210470	454	87065	608	680000	504			525031	550
29819	1074	339496	556	319322	204	651972	335	214428	1148	102681	747	680001	504			534394	862
30125	1074	350108	131	347236	499	666830	350	220444	777	102682	747	680012	504			571904	71
34503	692	384499	1201	354297	14	668562	592	221741	1338	102683	747	699609	734			598469	85
36191	1341	390740	733	369984	892	680150	504	244670	242	111509	398	750931	416			598470	85
36486	1341	390742	733	371238	569	680151	504	249816	1218	119701	843	761876	805			651983	335
37914	809	390800	733	378137	443	680152	504	300284	132	138941	1310	763791	1156			679999	504
37984	809	411673	1184	414820	451	680154	504	302710	585	139155	1310	837973	245			680150	504
38080	809	504474	255	422901	285	699068	754	310620	22	139354	1025	873977	411			680151	504
41030	459	504477	255	423337	1312	729209	543	310621	22	141113	793	874259	411			680152	504
41604	459	504479	255	423338	1312	730914	61	310829	22	144951	830	874361	411			680154	504
42527	459	519794	765	423348	1312	772920	617	318803	939	147036	830	874481	480			755712	493
43386	1190	519795	765	425014	699	772932	617	327721	621	149904	1085	893486	1064			772909	617
43720	1190	525030	550	426299	116	772958	617	327723	621	149906	1085	893740	1064			772911	617
43864	1190	525031	550	427715	566	772959	617	336939	348	151339	3	894016	1064			808971	380
44102	1190	528353	563	430193	325	772962	617	339296	556	156314	645	902757	541			808973	380
44423	1190	528354	563	441857	445	793293	492	345028	586	156315	645	928825	521			808974	380
44714	1190	534394	862	463541	533	793296	492	348847	131	168144	1023	939088	737			868278	1008
46264	1007	577792	321	472136	60	808855	380	350095	131	169213	697	944357	1112			1000285	63
46381	1007	598452	85	477793	1273	808973	380	351623	38	169216	697	970475	1224
46816	1276	598470	85	482397	607	808974	380	386568	201	169218	697	987659	1295
47894	1276	598472	85	482451	607	828888	804	387430	1168	182925	1260	991328	510
48638	1276	598473	85	499771	390	856137	171	390649	733	183090	1260	1010109	614
49370	1081	672193	1083	500091	1217	890466	1115	390800	733	186892	664
49388	1081	705959	1126	522346	573	967105	168	394320	273	191395	1328
51091	884	772909	617	528296	563	1003493	959	396847	462	191396	1328
51319	884	772911	617	549639	54			396848	462	192154	363
51448	884	808971	380	549786	54			411712	231	194729	925
51991	353	808973	380	566244	973			423348	1312	194739	925
55058	581	808974	380	592011	700			443020	683	196229	319
55841	267	817384	1160	608892	946			504515	255	203355	653
56240	823	891138	1198	644534	589			510089	970	209383	839
58979	86	895795	900	646448	967			525030	550	216245	369
59231	1043	906065	474	668893	224			525031	550	234658	107
60226	229	906066	474	701270	659			528521	563	245782	202
61997	143	936441	605	705976	1126			534394	862	245784	202
62007	143	985440	829	712411	1333			558899	1155	245986	1076
63117	455	1000285	63	713846	771			560484	265	249816	1218
66034	837	1010109	614	729209	543			571904	71	271530	383
66829	837			761708	805			583004	6	275827	507
67566	630			768779	73			598469	85	275828	507
68026	630			772944	617			598470	85	279416	500
69501	869			772952	617			637061	962	285202	1270
70236	7			772953	617			647384	1158	289326	1031
70539	7			772954	617			650466	1242	297857	132
71924	406			772955	617			651972	207	310620	22
72191	406			772964	617			651983	207	310621	22
73121	406			781629	33			665831	371	310829	22
73218	406			784767	149			670112	650	321123	1032
73598	893			791456	1267			671239	631	321169	752
73691	893			820502	1244			680150	504	327140	1080
74012	893			824340	536			680151	504	327721	621
74043	893			831196	275			680152	504	327723	621
75674	479			841576	82			680154	504	330515	1268
75699	479			846887	198			714887	252	333548	1078
75968	479			856112	171			717741	139	339252	861
76457	1357			880564	690			771253	166	339253	861
76913	312			883170	1029			772909	617	339256	861
76973	312			890665	1198			772911	617	339296	556
81353	544			890753	1198			808971	380	339417	556
81843	544			908070	1075			808973	380	339418	556
82995	1294			912231	473			808974	380	339420	556
87092	608			943559	314			832651	1027	339422	556
89982	1321			971657	916			860332	1088	339496	556
90058	1321			975919	838			861566	211	340186	848
90633	1321			994360	404			868278	1008	350108	131
90879	601			1002382	228			874918	565	350109	131
91392	601							878792	1348	350383	131
94452	1042							881820	1111	351182	131
96865	610							903073	541	352613	671
97873	610							906066	474	355699	175
100207	985							946656	1221	366190	1343
102121	747							971245	916	366428	1343
102659	747							976702	18	370429	892
104124	489							979767	482	372090	569
106017	281							1000285	63	374827	772
108164	79									382505	1179
109029	206									384499	1201
109856	206									390740	733
110345	398									390741	733
110657	398									390742	733
110982	398									390800	733
112492	836									390802	733
113356	1068									395296	978
113506	1068									400139	178
113695	1068									408888	44
113722	1068									415179	451
113875	1068									416040	446
115517	186									420234	251
116339	186									420876	723
116707	186									425204	699
117805	1332									435120	293
119966	843									435385	293
120385	843									437189	1142
121098	77									443120	683
121605	43									444155	1161
122220	43									447375	841
125954	817									449536	576
126629	453									463985	876
126775	453									479794	818
127297	461									479795	818
128057	361									480306	818
128618	160									482101	607
130899	998									486178	776
131642	490									494700	142
131849	490									494702	142
132076	490									501914	638
132177	490									504474	255
133492	41									504477	255
134107	815									504479	255
135857	1173									504515	255
136488	1173									519794	765
138367	317									519795	765
138880	1310									525030	550
139771	491									525031	550
139955	491									528353	563
140036	491									528354	563
142631	872									529100	1271
142914	872									534394	862
143688	1120									534526	862
143981	1322									537755	953
144865	1322									557329	1269
145443	830									560033	265
145758	830									561099	1283
147113	830									581830	547
147126	830									581887	457
147611	830									584467	311
149015	1085									587329	247
149906	1085									598447	85
150842	3									598451	85
151305	3									598452	85
153114	349									598470	85
155333	964									598471	85
155467	964									598528	85
156084	645									598529	85
158109	726									612052	1150
158484	486									614148	634
158584	486									614150	634
159651	1346									615633	316
160136	1346									619583	379
160408	1346									619823	379
161765	1326									620498	379
162338	643									633378	413
162386	643									634742	334
163310	899									634744	334
165407	833									643289	557
167397	1023									652335	51
171552	1202									652336	51
174016	155									654625	864
174784	1347									666228	467
175678	250									669278	224
176602	250									670606	515
176611	250									679606	504
177457	250									680165	504
180120	1048									680166	504
180294	1048									680167	504
182299	597									680168	504
182485	1260									680169	504
183827	123									683578	91
184454	123									686903	652
186090	789									695709	618
188542	1086									695710	618
189483	511									695711	618
189952	798									696363	47
190738	798									704893	994
191263	1328									717410	831
191284	1328									718355	139
195672	319									718491	139
195770	319									720815	546
196322	319									725683	746
196799	602									726402	1329
196946	602									729212	543
196982	602									730146	913
199206	743									735433	1065
201407	695									740386	109
201911	695									749321	345
202832	653									751925	1230
203676	271									752308	104
203721	1003									758455	658
203971	1003									766495	853
203973	1003									772909	617
205233	1307									772911	617
205785	254									776238	1281
206933	788									782100	1132
208272	65									782289	1132
208812	386									782292	1132
209102	386									787101	748
209229	839									790157	458
209443	839									791496	1267
212250	99									793974	492
213757	1148									794361	1058
214945	1148									797348	995
215840	369									797350	995
219355	1351									797351	995
219637	777									797352	995
220355	777									803665	156
221785	1175									805727	673
222771	221									808971	380
224277	1272									808973	380
224554	309									808974	380
225720	111									810702	877
225930	111									810932	877
228559	452									817384	1160
230044	291									822466	770
235999	115									826788	42
236198	115									833189	1027
237121	1300									836467	1203
237520	947									861570	211
237817	947									865918	306
237877	947									867013	257
237967	947									883704	1029
238123	947									891136	1198
238785	1101									902829	541
239465	1101									906066	474
239531	1101									911181	1159
240419	725									916467	134
240527	725									925480	1345
242356	554									936389	605
242721	554									946822	1221
242760	554									946903	1354
243111	1246									951121	791
245142	242									952297	344
245274	202									962318	50
245727	202									962319	50
246912	606									962321	50
247047	606									963272	1100
247081	1255									963670	1100
248261	1255									970989	916
248634	532									974102	441
249670	357									976696	865
250106	1218									981086	741
250687	531									985442	829
252099	660									987109	341
252585	660									998148	477
253648	388									998149	477
253929	388									1000283	63
254061	388									1008690	138
254508	388									1009816	138
255396	624									1010004	614
255474	624									1012656	101
255543	624
256519	141
257679	1151
257938	1151
258114	567
258458	567
259686	469
260205	1143
260589	1143
261489	55
262446	456
262607	456
262882	456
264224	152
268865	844
271403	383
272596	1011
272944	1011
273103	1011
273225	1011
274521	355
274692	355
274980	355
276105	507
276456	373
277023	373
277471	1051
279428	500
279512	500
281167	524
281173	524
282898	263
284681	326
285184	326
287684	181
290103	949
292744	784
292746	784
293170	784
294398	1037
295163	197
295478	197
297005	132
297464	132
300295	132
302520	585
304575	279
305956	320
307944	685
307986	685
308023	685
310506	22
310701	22
310904	22
311949	941
312797	739
314274	1144
316576	972
316669	264
317354	264
317746	239
317750	239
318622	939
319904	49
320262	49
322140	752
322142	675
323388	23
324647	904
325525	712
325644	712
327567	621
327642	621
327684	621
329971	1139
330190	1268
331020	1268
331983	706
333137	1078
336602	348
337139	348
338496	354
339454	556
339459	556
339461	556
339462	556
342329	528
343016	1062
347371	499
347578	499
351197	131
351800	38
351836	38
353986	14
354468	14
355647	1028
357406	842
358053	842
362075	545
362748	545
363621	731
363987	731
364232	731
364255	731
366558	1343
366819	1343
367227	1343
367920	232
368038	232
368178	232
370248	892
370881	157
370890	157
371827	569
372996	569
374063	655
375322	772
376825	1298
377540	103
377541	103
377553	103
378416	443
379796	1001
382630	8
385096	1223
386996	1168
387353	1168
389462	1059
389467	1059
389624	1059
389932	1059
390298	733
390796	733
391789	728
392047	728
392717	36
393541	273
393859	273
394549	273
394828	978
394876	978
395387	978
395580	978
395904	978
396747	462
397474	449
399832	1154
401496	1335
401509	1335
402071	248
402359	248
402492	485
404517	1262
405093	1342
405969	28
406917	887
409402	694
409750	294
409812	294
410131	294
411223	1184
411673	1184
412286	231
412725	1318
412859	1318
415480	451
417122	88
417287	88
420170	251
420233	251
420678	723
421076	723
422259	401
422331	401
423346	1312
424417	699
426818	116
427376	116
428617	807
428929	807
433350	547
434022	293
440678	1045
441377	445
441468	445
442365	1069
444926	1161
447345	1208
447363	841
447390	841
447906	841
447987	841
448530	235
450310	1041
452018	1185
453049	1185
454609	958
454824	958
456625	717
456757	717
456826	717
461711	1290
464082	876
464781	1344
466154	799
467053	1131
467200	1131
468199	1146
468676	1146
468694	1146
471284	1049
471743	1084
472433	60
474252	1024
475081	984
475495	984
477232	1273
478900	237
479142	237
482545	607
487366	963
490075	94
492192	1087
492885	1249
494700	142
494702	142
494703	142
496858	797
496981	797
498253	640
498343	640
499034	390
499597	390
500460	301
502122	31
502671	735
504183	255
504841	1137
505199	1137
505427	1137
509021	661
509022	661
512669	897
512942	1264
513330	385
514280	385
515504	417
515725	417
515726	417
516351	417
517249	162
519367	140
519465	140
519742	765
520186	1258
520299	1258
521623	951
521768	951
524842	292
524956	550
525163	550
525821	550
528028	563
528318	563
528890	1271
530175	1213
536083	862
537712	953
538833	1013
539422	806
540597	1319
541395	1319
541971	923
542503	397
542519	397
543823	215
544744	774
546295	846
548144	979
549465	54
549813	54
550226	424
552219	1050
554064	1035
555297	926
556650	1269
557403	656
560030	265
560726	1283
561292	106
561461	106
561671	106
566741	729
568596	259
569347	259
569433	259
569688	259
570815	603
571504	603
571601	71
572045	71
572756	71
572821	71
575553	1099
575810	1099
575967	1099
576210	1099
576467	1099
576473	1099
576605	1099
576673	1099
577539	321
577790	321
577792	321
578190	1116
578762	1116
581529	457
581794	457
582503	457
583938	781
585004	311
587188	247
587880	247
587952	247
588873	766
588885	766
589660	854
589718	854
590549	854
596366	118
596498	649
596910	968
596943	968
597561	968
598880	85
599106	85
599672	318
600404	1169
601679	1133
602126	1133
602784	1277
604232	1219
604283	1219
604742	578
607067	858
607632	858
608536	946
609628	1018
609669	1018
611059	1256
611146	1256
611233	1256
614217	634
614408	634
614489	634
615368	945
615410	316
615419	316
616247	745
616415	745
616437	745
617622	646
618994	214
620095	379
620335	379
621116	418
621674	418
622250	709
622379	709
623194	84
623955	84
624289	84
625513	1288
625646	165
625843	165
627673	693
629965	514
631656	1070
633927	334
634429	334
635209	246
636794	962
636797	962
637166	962
637637	962
638225	587
638868	983
639325	983
639868	1082
639891	1082
640050	1082
641121	1222
641454	25
641679	337
642568	813
644347	896
647092	1158
650236	1242
651078	1123
651823	335
652271	335
653986	460
654967	864
656521	1073
656747	1073
657128	981
657973	236
659059	686
659473	399
664325	762
664456	762
667964	592
668456	592
669698	604
670351	515
673720	928
675714	440
676894	1140
677452	1337
678649	465
679072	465
679997	504
679998	504
680000	504
680001	504
681283	769
682723	1009
683389	629
686618	579
686882	652
688686	487
693863	1136
695357	618
695595	618
695597	618
696548	403
696905	403
700406	734
701150	639
701339	659
701990	97
703263	57
703821	868
703863	868
704013	868
705960	1126
706496	1126
707329	323
708334	1257
709023	1257
709025	1257
709814	880
710340	880
710508	880
711230	760
711446	760
711818	1333
712121	1333
712462	1333
712579	1333
712676	1333
712681	1333
714568	771
715567	252
716351	1110
718806	792
718808	792
725220	746
725367	746
726634	1329
726809	1329
729218	543
730763	913
730910	61
731183	61
731204	61
733244	481
736141	522
736762	522
737395	672
737435	672
737467	672
737791	672
741906	5
744718	1052
747049	68
750494	1141
751134	69
751704	1230
752014	104
752319	104
752715	104
754158	870
754302	870
754640	1165
757242	176
757760	525
758196	658
758834	288
759308	288
761033	1033
763403	1156
764433	1156
764667	1156
765006	226
767217	1187
768167	484
768770	73
778834	1164
779841	283
780342	432
780613	432
781332	33
781551	33
781692	33
783372	866
784699	149
785208	912
786186	814
786375	794
786927	794
788943	346
788991	346
789733	4575
790510	458
793042	492
793203	492
796426	636
798511	1284
798514	1284
799315	509
799495	509
801262	1113
802588	977
804032	376
804034	376
805653	673
805891	673
806524	944
806536	944
808735	233
811308	877
811512	877
811636	877
812969	924
813196	924
813454	227
813574	227
817961	1160
818410	598
819671	881
820130	881
820782	284
822033	549
822774	770
825498	1016
825855	1016
826074	811
826242	811
827298	517
827964	280
828856	804
829119	808
830509	195
831640	13
836662	1203
837359	1203
837361	1203
837922	245
838474	151
841516	423
842758	82
842938	82
844385	901
845676	719
846952	198
847796	92
849521	300
849595	300
849597	300
849828	300
852240	890
853210	651
853793	74
854978	1220
857380	121
857800	173
861727	211
862037	850
863198	1017
863648	1017
864293	45
864812	955
865250	200
865496	306
865875	306
868240	1008
868651	1008
871091	856
872114	347
872852	411
874481	480
875453	565
879845	1348
879847	1348
879871	1348
881010	431
881478	1111
883704	1029
885321	1029
885456	1183
885905	287
886653	360
888104	889
889651	1115
892188	761
895309	16
895355	16
897313	505
899116	505
901023	535
901331	535
902160	1324
902264	1324
902367	541
904461	757
904614	757
905066	757
906065	474
906066	474
907446	1075
908037	1075
908355	1334
908494	1334
908752	1334
909166	392
910333	750
910933	1159
911758	473
911760	473
911878	473
912078	473
912378	473
912495	384
913125	384
913506	327
916336	134
918163	187
919533	1227
919845	1227
920034	1227
921086	665
922329	9
923130	615
923256	615
925241	1345
925312	1345
925457	1345
925597	1301
926035	1301
926998	568
927481	568
927694	521
928049	521
928051	521
928180	521
932627	15
936441	605
939295	737
939615	737
940961	1316
941647	988
941920	552
944357	1112
944399	1112
945621	622
945718	1239
945918	139
947882	982
948711	990
950164	262
950911	791
952513	420
954188	147
954466	147
954611	208
955543	295
957739	778
957904	778
958354	778
959071	820
961303	1109
961672	50
962015	50
962401	50
965279	89
965360	89
965659	89
965717	89
966439	168
967826	1355
972074	1138
973026	1138
973261	740
976033	838
978364	553
978667	495
979017	495
983808	274
984423	81
984981	829
985777	1125
988478	421
989144	1077
991605	676
992931	184
993682	572
994054	404
994483	404
995084	404
996008	225
996401	225
997028	957
998696	902
998924	902
999182	584
999361	584
1002106	228
1002253	228
1003123	959
1004797	648
1006120	471
1007488	260
1007762	260
1007845	260
1008340	986
1008834	138
1009273	138
1009564	138
1010109	614
1011495	303
1011879	303
1012442	101
1013505	177

## Sheet: P_dispersa_lineage
Supplementary File S5.2 Nucleotide sites within the concatenated alignment causing conflicting species relationships for the P. dispersa lineage
(P. dispersa, P. eucrina, P. septica)	Gene number	(P. dispersa, P. wallisii, P. eucrina, septica)	Gene number	(P. dispersa, P. wallisii, P. rodasii, P. rwandensis, P. sp. GM01, P. cypripedii, P. sp. At-9b)	Gene number	(P. dispersa, P. wallisii, P. rodasii, P. sp. GM01)	Gene number	(P. dispersa, P. wallisii, P. eucrina, P. septica, P. deleyi)	Gene number	(P.dispersa, P. wallisii, P. eucrina, P. rodasii, P. rwandensis, P. sp. GM01)	Gene number	(P. dispersa, P. wallisii, P. eucrina, P. rodasii, P. rwandensis, P. sp. GM01, P. cypripedii, P. sp. At-9b)	Gene number	(P. dispersa, P. wallisii, P. rodasii, P. rwandensis, P. sp. GM01, P. cypripedii, P. sp. At-9b, P. sp. A4)	Gene number	(P. dispersa, P. wallisii, P. eucrina, P. sp. GM01, P. septica)	Gene number	(P. dispersa, P. wallisii, P. rodasii, P. rwandensis, P. sp. GM01)	Gene number	(P. wallisii, P. rodasii, P. rwandensis, P. sp. GM01)	Gene number
8699	1089	28118	1207	3276	677	15379	83	33762	506	2584	219	765	966	6206	1336	33763	506	15329	83	3574	12		Genes that have undergone recombination
24122	1327	33762	506	9418	937	28068	1207	37826	809	3889	12	3276	677	13769	128	37847	809	15384	83	6321	1336
37847	809	37847	809	16828	278	96670	1292	37847	809	3897	12	3277	677	16391	377	37848	809	21674	419	10654	682
37848	809	37848	809	16829	278	127980	361	37848	809	4677	12	7090	1336	23100	37	37849	809	23389	37	15443	83
37849	809	37849	809	25567	599	130548	626	37849	809	4678	12	9667	682	23101	37	52061	353	35648	909	19281	969
52061	353	43460	1190	25568	599	139060	1310	57831	790	7584	1089	9840	682	27795	1207	57831	790	50753	884	19283	969
57831	790	52061	353	26979	1121	146397	830	57832	790	7585	1089	11013	682	37868	809	57832	790	51208	884	27095	1121
57832	790	57831	790	28708	704	152004	919	62949	455	7587	1089	15345	83	37869	809	59822	801	55728	267	27468	1207
66470	837	57832	790	28807	704	160842	1057	62951	455	8560	1089	16154	377	47540	1276	66470	837	62019	143	28212	1207
66487	837	61526	143	29165	1074	167165	1023	111622	836	8620	1089	16155	377	47559	1276	102247	747	62820	143	29090	1074
78958	4	62949	455	44921	751	187257	664	141262	464	9159	937	16880	278	49707	1081	111622	836	67194	1055	29136	1074
86706	647	62951	455	45999	119	189559	511	141263	464	15389	83	17355	278	52030	353	114814	186	70704	87	29904	1074
86790	494	66392	837	46025	119	194732	925	245725	202	16155	377	21727	1095	54266	472	124324	620	71285	915	32665	506
89204	767	66470	837	47540	1276	229453	1172	245726	202	17621	878	22089	1095	57994	790	126667	453	72108	406	45987	119
92566	114	77529	4	51285	884	242146	554	245788	202	21036	1280	22118	1095	62384	143	141262	464	73195	406	50766	884
93138	1042	85209	444	52030	353	245788	202	245789	202	22983	37	23850	1327	62387	143	141263	464	75673	479	51510	884
111622	836	86724	647	53946	472	245789	202	245790	202	22984	37	23851	1327	67834	630	158997	1263	77809	4	52970	366
117820	1332	100290	150	54266	472	245790	202	281434	524	23328	37	23853	1327	75662	479	170351	1202	81331	544	55346	307
123051	736	111622	836	54632	472	248439	886	297857	132	23329	37	23931	1327	77894	4	183716	123	85513	444	56682	823
129651	932	141262	464	65678	435	256260	141	315229	1235	23340	37	23953	1327	79358	67	186347	664	102246	747	63032	455
131795	490	141263	464	69759	869	297857	132	327687	621	23389	37	25140	627	81244	544	191395	1328	102804	747	63702	455
141262	464	156052	645	71318	915	303348	372	339417	556	28212	1207	25141	627	81245	544	191396	1328	102805	747	67469	1055
141263	464	183716	123	76462	1357	309077	17	339418	556	31494	62	25742	599	82329	544	194732	925	112975	1068	74055	893
153822	935	186347	664	76543	312	310536	22	339420	556	31498	62	26181	1121	83267	1294	228031	56	125230	1097	79548	67
186347	664	214427	1148	77828	4	328364	189	339422	556	33040	506	28198	1207	96168	1292	245725	202	127980	361	83005	1294
187464	664	242907	554	79358	67	331583	706	339496	556	33203	506	29139	1074	96579	1292	245726	202	129679	932	85348	444
191655	1328	245725	202	83223	1294	336504	330	339633	556	33733	506	30221	1074	102250	747	245790	202	132536	41	94017	1042
192415	816	245726	202	84541	822	338613	354	339635	556	33752	506	32119	506	102500	747	251232	1331	133449	41	94923	895
193991	1214	245788	202	84561	822	357951	842	350108	131	35579	909	33072	506	102681	747	289239	1031	141054	793	94925	895
211201	428	245789	202	84562	822	366522	1343	366195	1343	37689	809	33204	506	102682	747	297857	132	141055	793	105474	281
220281	777	245790	202	90068	1321	384492	1201	384499	1201	37714	809	33864	506	102683	747	310620	22	141302	464	120389	843
220442	777	249280	357	96168	1292	384496	1201	390740	733	37797	809	33886	506	120095	843	321564	752	148294	1085	127980	361
230293	291	250797	531	97067	610	384499	1201	390741	733	43220	1134	35223	692	127442	461	339417	556	149360	1085	129003	932
245725	202	253284	996	97656	610	385622	136	390742	733	43854	1190	35625	909	133524	41	339418	556	152004	919	129446	932
245726	202	255840	624	102070	747	409874	294	390800	733	43935	1190	36852	1341	138667	927	339420	556	153195	1105	130542	626
245788	202	272950	1011	102246	747	414472	1054	407178	887	43988	1190	37964	809	139054	1310	339422	556	154542	20	135396	960
245789	202	278536	782	102681	747	430154	325	484447	888	46454	42	37965	809	141302	464	339496	556	156927	1072	141300	464
245790	202	297857	132	102682	747	430564	325	487226	963	46724	412	38697	997	149904	1085	339633	556	160842	1057	146931	830
266893	1056	310620	22	102683	747	470039	1093	504474	255	48984	1276	38698	997	149906	1085	339635	556	168903	697	152653	349
272950	1011	321564	752	102804	747	504474	255	504477	255	48986	1276	43015	1134	163104	899	350108	131	170355	1202	154554	20
275883	507	327687	621	103222	742	504478	255	504479	255	51129	884	43737	1190	169213	697	352630	671	174031	155	157366	1072
285685	1270	334423	993	103544	742	521140	1006	504496	255	51823	353	43955	1190	169216	697	354346	14	183795	123	172590	46
300384	132	339417	556	103587	742	521493	1006	504497	255	51900	353	43957	1190	169218	697	365590	133	192179	363	174517	1309
304687	478	339418	556	105534	281	594213	266	504518	255	54475	472	45347	551	177274	250	384499	1201	192366	816	174722	1347
310620	22	339420	556	106632	821	600341	1169	519794	765	54493	472	45538	119	179999	1084	389386	1059	192434	816	190047	798
319808	49	339422	556	106634	821	608307	773	519795	765	54494	472	45999	119	183519	123	390740	733	194732	925	192917	816
321564	752	339496	556	111613	398	610323	305	528353	563	55416	307	47904	1276	184643	123	390741	733	194894	925	194732	925
324684	904	339633	556	115881	186	616268	745	528354	563	61775	143	48909	1276	188085	764	390742	733	195015	925	198528	743
333788	1078	339635	556	115882	186	636073	962	534394	862	62790	143	49148	1276	188540	1086	390800	733	195016	925	217660	863
336171	787	350108	131	120014	843	718844	792	557487	656	63031	455	49697	1081	194732	925	391438	220	195878	319	220882	1196
339417	556	351445	131	121000	1002	727567	570	598452	85	63204	455	50648	884	214568	1148	409852	294	197307	602	221408	1338
339418	556	352630	671	121074	77	740881	961	598470	85	63494	455	50688	884	214569	1148	409874	294	199057	743	221409	1338
339420	556	354346	14	126318	453	761852	805	598472	85	64908	642	51992	353	220443	777	423346	1312	207989	65	228370	56
339422	556	377558	103	129004	932	762672	847	598473	85	65679	435	52031	353	226097	111	448245	235	211253	428	238021	947
339496	556	384499	1201	132028	490	788946	346	651972	335	67025	1055	52037	353	233112	39	459749	942	214031	1148	241614	554
339633	556	390740	733	132656	41	801641	1113	666830	350	68907	715	54205	472	238942	1101	504474	255	218194	863	244044	596
339635	556	390741	733	133368	41	804118	376	672193	1083	71724	406	54632	472	245786	202	504477	255	219621	777	245786	202
347398	499	390742	733	133505	41	836989	1203	680150	504	72952	406	55512	267	245788	202	504479	255	220444	777	245788	202
350108	131	390800	733	134647	815	855554	171	680151	504	75046	611	57613	823	245789	202	510170	970	221942	1175	245789	202
354346	14	402382	248	135483	960	874939	565	680152	504	75054	611	57622	823	245790	202	510171	970	228776	452	245790	202
356776	732	409874	294	135836	1173	893008	761	680154	504	75558	479	61801	143	252535	660	519794	765	229224	1172	247135	1255
385637	136	417598	88	139413	1025	931233	32	699068	754	75579	479	62158	143	270160	70	519795	765	245786	202	252019	660
390740	733	449062	410	141302	464	940371	95	761840	805	79396	67	63522	455	270768	183	528353	563	245788	202	254038	388
390741	733	467509	1131	142033	872	942607	552	772920	617	80248	67	65814	435	285004	326	528354	563	245789	202	255691	624
390742	733	504474	255	142856	872	947422	1354	772932	617	81907	544	65815	435	289469	1031	534394	862	245790	202	268573	844
390800	733	504477	255	143505	1120			772958	617	83005	1294	66272	837	291202	122	543319	223	249821	1218	274182	1011
397100	449	504479	255	146170	830			772959	617	89645	1321	66995	1055	296368	197	556035	339	250581	531	278756	782
409874	294	510170	970	146353	830			772962	617	90538	1321	67368	1055	297857	132	563435	296	250602	631	279343	500
451335	365	510171	970	147224	830			793293	492	90846	601	69874	869	299020	132	579263	1116	251556	1297	279956	1233
458451	1178	519794	765	152051	919			793296	492	92028	114	71651	406	302987	372	598452	85	256998	141	284282	1108
476059	984	519795	765	153922	935			808968	380	93882	1042	72405	406	313333	739	598470	85	257654	1151	295124	197
480306	818	520704	1006	157104	1072			808972	380	95543	895	72499	406	313722	920	598472	85	266550	1056	295401	197
481743	1313	527990	563	160891	1057			817384	1160	95844	879	72657	406	314893	906	598473	85	266835	1056	297857	132
488015	256	528353	563	161162	1057			890466	1115	96117	1292	72777	406	321123	1032	616460	745	266887	1056	302242	585
507638	696	528354	563	163599	170			891138	1198	96120	1292	75054	611	335376	756	658890	686	274968	355	312490	668
510170	970	529911	1213	167562	1023			895795	900	96169	1292	77380	4	350108	131	659464	399	282448	263	312621	668
510171	970	530772	1213	172549	46			954515	147	99595	985	77724	4	350383	131	680148	504	297857	132	313133	739
517077	417	534394	862	172550	46			985440	829	101404	657	77828	4	351535	38	680150	504	300642	132	323820	904
519794	765	559149	265	172733	46			1000285	228	102804	747	80374	67	355242	1028	680151	504	302040	585	324585	904
519795	765	561644	106	178402	250					102806	747	80375	67	356524	539	680152	504	306279	320	332723	1078
526872	1299	562543	296	185864	789					103668	742	80376	67	366190	1343	680154	504	308417	685	336234	330
528353	563	566272	729	186312	664					103670	742	83602	1096	368429	232	720720	1286	310469	22	338924	861
528354	563	584381	311	187008	664					104947	351	83604	1096	377596	443	754424	1165	313585	920	340405	848
534394	862	591470	700	187459	664					110436	398	84037	1096	381040	1014	793435	492	317044	264	343988	196
545508	619	598452	85	192112	363					110762	398	84701	822	383596	1201	817384	1160	318466	939	344379	885
563279	296	598470	85	192123	363					111026	398	84771	822	383607	1201	879794	1348	321442	752	350185	131
569253	259	598472	85	192468	816					111329	398	85364	444	384492	1201	879795	1348	327580	621	354280	14
581232	1304	598473	85	192527	816					111678	836	85899	1253	384496	1201	911197	1159	327685	621	357729	842
582445	457	635185	246	194635	925					116531	186	89777	1321	384499	1201	911198	1159	328566	24	362982	545
585290	199	672193	1083	194732	925					120911	1002	90058	1321	390800	733	911222	1159	334548	993	373599	655
596459	649	680139	504	206742	788					126163	453	90181	1321	396475	308	968836	702	341242	1353	381358	1014
598453	85	680150	504	207273	65					126477	453	90182	1321	416041	446	969045	1030	343636	196	382631	8
598470	85	680151	504	215891	369					126478	453	93064	10	416042	446	969046	1030	349016	131	383168	8
598472	85	680152	504	218892	863					127030	453	93882	1042	417215	88	1002045	228	354620	14	384496	1201
598473	85	680154	504	218914	863					127528	461	96214	1292	422487	401	1011294	558	355759	175	384499	1201
600656	1169	680764	100	220623	777					127980	361	96462	1292	428505	807	1013793	177	357951	842	388196	241
606944	542	697874	663	223693	1323					129423	932	96670	1292	433606	547			359604	98	390457	733
616656	745	697876	663	228342	56					129429	932	98259	976	446351	1208			363850	731	409874	294
622277	709	706605	1126	229209	1172					129594	932	98311	976	447681	841			364446	849	409875	294
626578	1128	718586	792	233028	425					129996	932	98367	976	449771	576			366208	1343	411045	1026
626804	1128	722042	30	243605	596					140192	491	98391	976	458279	1178			375308	772	413526	1318
636393	962	754424	1165	245786	202					140336	491	98640	590	461656	1107			375366	1019	424117	699
644840	987	760145	840	245788	202					140337	491	98851	985	462499	1290			375689	681	426878	116
657353	981	760868	1033	245789	202					141006	793	99198	985	495942	112			375718	681	440837	1045
668639	592	760869	1033	245790	202					141007	793	99199	985	504474	255			380746	1001	444962	1161
680150	504	772360	617	248944	1350					141310	464	99894	985	504478	255			384492	1201	452297	1185
680151	504	799263	509	248945	1350					143715	1120	99895	985	521717	951			384496	1201	461399	1107
680152	504	799264	509	255580	624					144172	1322	101399	657	521768	951			384499	1201	461691	1290
680154	504	817384	1160	255581	624					144361	1322	101400	657	540369	905			384799	1201	475235	984
690639	297	820339	1244	269752	70					144363	1322	101483	657	557402	656			385622	136	486283	776
706360	1126	822632	770	271292	383					144390	1322	101484	657	560515	265			391929	728	491879	1087
707977	1257	847304	92	274180	1011					144391	1322	102068	747	568088	259			393658	273	496360	874
730403	913	854126	612	274448	1011					147636	830	102360	747	568089	259			394340	273	503989	255
754424	1165	869005	172	274449	1011					149061	1085	102375	747	568090	259			394341	273	504474	255
767576	1187	879794	1348	276408	918					149886	1085	102600	747	571010	603			396593	308	504478	255
768872	73	879795	1348	276458	373					149887	1085	102663	747	571836	71			401624	1335	513366	385
797047	995	891138	1198	281189	524					151477	3	102681	747	573182	582			409874	294	516591	417
801565	1113	895795	900	282440	263					151478	3	102682	747	573712	530			409875	294	525095	550
817384	1160	909531	392	285026	326					151986	919	102683	747	577581	321			422492	401	543320	223
821372	284	911222	1159	287905	72					152979	349	102804	747	580366	66			425439	699	547339	277
822632	770	918654	1098	287960	72					153196	1105	102805	747	585288	199			430666	325	547340	277
833188	1027	921735	102	292980	784					153217	1105	103662	742	591107	700			432784	940	548394	979
846386	594	926896	568	293350	784					156294	645	103663	742	592556	700			436645	496	548740	1320
846623	198	967347	168	297857	132					158314	486	103672	742	598447	85			438842	276	559225	265
876212	198	967348	168	302169	585					158315	486	103781	489	598451	85			448243	235	575091	1099
879794	1348	969045	1030	302987	372					160024	1346	106629	821	598452	85			451244	126	575095	1099
879795	1348	969046	1030	307524	320					160035	1346	107757	342	598483	85			454570	958	575376	1099
901236	535	981170	741	312648	668					160843	1057	110083	367	598484	85			455059	1274	575377	1099
911222	1159	985440	829	314794	906					162832	643	110762	398	602122	1133			458281	1178	581487	457
918654	1098	990461	954	316423	972					168136	1023	111026	398	610430	305			462228	1290	582280	800
920663	1227	991098	510	327704	621					176072	250	111027	398	614148	634			462409	1290	585290	199
933621	15	999709	623	328277	189					184818	759	111332	398	614150	634			471232	1049	591891	700
941956	552	1000285	228	328337	189					184819	759	111333	3998	619480	270			483462	888	592405	700
961018	633	1000740	1349	331806	706					184824	759	113389	1068	630599	514			488476	352	592562	700
969045	1030			349961	131					185251	789	119270	1197	633355	413			490257	1040	598413	703
969046	1030			349963	131					185503	789	119997	843	637577	962			492039	1087	598453	85
988352	421			350032	131					185572	789	122453	736	639772	1082			499093	390	600356	1169
994441	404			350320	131					188931	511	126267	453	645434	562			501212	883	605742	76
995504	404			351535	38					188932	511	127090	461	651762	207			504474	255	618811	214
1000285	63			355218	203					190379	798	128697	160	651974	335			504478	255	618894	214
1002221	228			355243	1028					190507	798	130561	626	652335	61			505089	1137	625816	165
1005619	471			355793	175					190508	798	130562	626	652336	51			508272	560	640883	1222
1009060	138			358870	1066					190509	798	130826	998	653302	1036			515854	417	641307	25
				359650	430					191259	1328	130931	998	669150	224			520114	1258	648905	561
				361059	545					192127	363	131858	490	671030	1061			520458	1258	648938	561
				363850	731					192275	816	133168	41	671200	1061			524530	292	651375	207
				364553	849					192467	816	133169	41	671349	631			526289	129	666722	400
				365800	133					192570	816	133220	41	672195	1083			536555	862	669960	650
				367764	232					192581	816	133367	41	672196	1083			539761	806	671094	1061
				369576	1145					192635	816	133368	41	679999	504			548306	979	679180	465
				370696	157					192637	816	133536	41	680165	504			552244	1050	680167	504
				370851	569					193753	1091	133545	503	680166	504			564293	192	681295	463
				371991	569					194732	925	133554	503	680167	504			574672	534	682223	1009
				375741	681					194894	925	134942	960	680168	504			577093	835	688509	487
				382082	1179					199100	743	135215	960	680169	504			578682	1116	694250	1124
				382482	1179					200055	1153	135216	960	683729	91			580362	66	694463	1124
				383707	1201					200074	1153	135330	960	690688	297			581630	457	706301	1126
				383713	1201					200099	898	135396	960	695709	618			585288	199	710766	880
				384443	1201					200337	898	135397	960	695710	618			588104	758	711057	880
				384487	1201					200338	898	135611	1173	695711	618			588119	758	717980	139
				384492	1201					204782	1307	135612	1173	701803	97			588819	766	722729	222
				384496	1201					207474	65	135704	1173	703549	57			591508	700	727472	1199
				384499	1201					207475	65	135773	1173	703620	57			591889	700	739921	109
				390620	733					211225	428	135838	1173	705991	1126			592051	700	745397	76
				396955	462					211226	428	135856	1173	706225	1126			595193	266	745728	476
				401372	1335					211264	428	136341	1173	714034	771			595199	266	759787	840
				401724	1335					211265	428	136481	1173	725366	746			598451	85	768054	484
				409874	294					211696	428	136483	1173	725683	746			598452	85	769100	73
				409875	294					212099	99	136979	422	727163	1329			630754	514	770623	166
				413219	1318					212197	99	139082	1310	730455	913			633682	413	782289	1132
				413451	1318					212217	99	139083	1310	738672	796			633683	413	782292	1132
				413840	1318					212530	99	139246	1310	749191	345			638984	983	786823	794
				414378	1054					212531	99	139388	1025	751416	69			646404	967	794787	803
				416041	446					213691	1148	139412	1025	756065	493			646405	967	802291	1113
				416042	446					217481	930	139413	1025	762862	847			647177	1158	802292	1113
				416457	145					218795	863	139904	491	782289	1132			654080	1106	804519	376
				421532	401					218797	863	139905	491	782292	1132			667306	350	818014	1160
				422836	285					220881	1196	140045	491	787101	748			669146	224	823447	536
				422837	285					221871	1175	140046	491	789049	346			669667	604	823448	536
				424892	699					221942	1175	140337	491	797348	995			672061	1083	824661	536
				426488	116					221944	1175	140669	793	797350	995			672195	1083	830804	275
				427368	116					222133	221	142854	872	797351	995			673888	928	850038	194
				432045	940					229572	1172	142856	872	797352	995			680167	504	852231	890
				433513	547					232456	425	143761	1120	802291	1113			688260	467	871506	856
				438620	1142					234244	107	144746	1322	805974	673			688681	467	875276	565
				439070	276					236266	115	145591	830	825847	1016			690084	1206	877496	185
				441478	445					236275	115	147036	830	829267	808			695665	618	887772	889
				442089	234					241238	554	147640	830	831198	275			701836	97	890514	1115
				455897	717					241588	554	148231	1085	832903	1027			706460	1126	912782	384
				456109	717					241606	554	148251	1085	833189	1027			707403	323	917851	187
				456418	717					241621	554	148320	1085	841852	82			707733	1257	921297	1015
				456419	717					242408	554	149911	1085	849463	300			709451	1257	924417	498
				460388	1020					244117	242	151395	3	850591	662			710772	880	925610	1301
				461811	1290					244118	242	152898	349	853520	651			711381	760	928001	521
				464737	1344					245005	242	152946	349	879079	1348			711393	760	928459	521
				470535	1049					245731	202	152977	349	891136	1198			712624	1333	939951	95
				470536	1049					246356	1076	153216	1105	901438	535			717734	139	941360	988
				477703	1273					247405	1255	153217	1105	902269	1324			718844	792	944099	1112
				482467	607					247426	1255	156770	645	903243	541			719868	792	945631	1239
				484613	744					253697	388	156792	645	904272	757			724749	1303	957441	778
				485480	952					255329	624	156793	645	911180	1159			727472	1199	980247	741
				485826	776					255589	624	157193	1072	916263	134			727754	1243	992883	184
				486804	963					255591	624	158318	486	920218	1227			729238	543	999044	902
				493779	29					255733	624	160783	1057	921624	102			731381	61	999377	584
				494913	142					255734	624	160818	1057	928568	521			733168	481	999831	623
				497147	797					256499	141	160891	1057	931336	32			733224	481	1006016	471
				499411	390					259363	1104	161611	1057	952297	344			734157	396	1006044	471
				504474	255					259364	1104	162446	643	962308	50			734308	396
				504478	255					259385	1104	162552	643	962318	50			736028	522
				515149	417					259386	1104	162717	643	962319	50			737977	672
				523179	331					262699	456	162741	643	962321	50			738239	796
				524493	292					263403	191	162742	643	968910	1030			739291	113
				525021	550					263468	191	162885	643	971470	916			742817	1177
				528370	563					263598	191	162987	899	985442	829			744589	707
				531927	786					269914	70	163599	1170	989269	1077			744591	707
				536558	862					269975	70	166102	1314	999831	623			750539	1141
				536788	862					271624	383	166341	1314	1006981	471			761852	805
				539394	806					271625	383	166470	1314					762672	847
				544625	577					272176	1011	167506	1023					768794	73
				545265	1289					272200	1011	171601	1202					782289	1132
				545351	1289					272201	1011	172299	1202					782292	1132
				549890	424					272347	1011	172678	46					786436	794
				551691	1050					272674	1011	172732	46					789321	346
				552154	1050					273491	1011	173083	46					796287	636
				554080	1035					278757	782	174658	1347					796638	636
				554081	1035					278758	782	174661	1347					805230	666
				557275	1269					280854	871	175865	250					805275	666
				557344	1269					281144	524	175922	250					805433	666
				559568	265					282429	263	176009	250					823443	536
				560189	265					283336	1204	176010	250					824659	536
				560519	265					283957	1108	176292	250					824660	536
				562463	296					285990	343	177269	250					828747	280
				565466	593					286442	343	177280	250					829506	195
				566506	973					294412	1037	182925	1260					835534	965
				567073	729					296357	197	185327	789					838603	151
				568446	259					297459	132	185744	789					856159	171
				574587	534					297460	132	185751	789					857048	121
				576270	1099					297857	132	186314	664					857249	121
				576271	1099					300625	132	186319	664					857448	121
				577452	321					300626	132	186340	664					857457	121
				577548	321					300638	132	186345	664					860840	389
				580360	66					300712	132	187007	664					863963	678
				585288	199					302054	585	187008	664					867268	1232
				587802	247					302242	585	187949	832					869195	1251
				588435	766					303151	372	188051	764					869197	1251
				597604	968					303159	372	189835	798					870738	856
				598451	85					303170	372	192112	363					877969	1038
				598452	85					306637	320	192122	363					880167	1278
				598783	85					306740	320	192366	816					895784	900
				600519	1169					306741	320	192467	816					901307	535
				602743	1277					308276	685	192468	816					902467	541
				614148	634					310470	22	192789	816					903225	541
				614150	634					313315	739	192814	816					912349	473
				615894	316					313316	739	194732	925					914036	929
				619757	379					314153	1144	196215	319					914629	929
				622732	84					314160	1144	199045	743					915981	1339
				639635	1082					324817	904	199060	743					916355	134
				640660	1222					327580	621	200113	898					918136	187
				644318	896					327581	621	202094	695					920095	1227
				644335	896					327598	621	203372	653					921624	102
				644684	589					327685	621	206940	788					924544	1216
				646718	967					330390	1268	206954	788					925474	1345
				651762	207					331581	706	207043	788					928500	521
				651915	335					331583	706	207098	788					928922	521
				651984	335					332640	1078	208857	386					931457	680
				666636	400					335543	756	211858	428					934364	1330
				666637	400					336059	756	212099	99					943792	1112
				670697	515					336232	330	213658	1148					945363	622
				672010	1083					339417	556	214004	1148					947350	1354
				672195	1083					339418	556	214334	1148					947422	1354
				672196	1083					339420	556	214896	1148					947425	1354
				672312	1083					339422	556	216631	930					955354	208
				679999	504					339478	556	216695	930					958201	778
				680167	504					339496	556	216697	930					959008	820
				682518	1009					341242	1353	216797	930					965027	89
				683739	629					341323	528	216809	930					970648	916
				687869	487					341574	528	216822	930					979310	482
				688494	487					343032	1062	218435	863					995819	414
				689266	487					343033	1062	218646	863					997727	426
				690495	1206					344453	885	219612	1351					998799	902
				695784	618					344454	885	220411	777					999384	584
				703215	57					346288	595	220525	777					999445	623
				704248	868					350108	131	220623	777					1005265	471
				705784	1126					350183	131	220814	387					1007702	260
				705991	1126					350184	131	222133	221					1010808	21
				712613	1333					350185	131	223282	221					1012598	101
				714797	771					350187	131	223283	221
				727702	570					350696	131	223791	1323
				728442	1176					350698	131	226853	1254
				730440	913					350819	131	227004	1291
				734669	396					350820	131	227906	1291
				738671	796					353612	711	227907	1291
				746337	529					355254	203	228342	56
				746642	583					357729	842	231333	374
				749391	698					359508	98	236281	115
				751431	69					359690	430	238217	947
				752562	104					360988	1240	238218	947
				754424	1165					366572	1343	239607	1101
				755720	493					366910	1343	240879	554
				755955	493					366937	1343	240880	554
				758752	288					367054	1343	241886	554
				761682	805					368485	232	243092	1246
				761685	805					368486	232	243388	1189
				762497	847					370638	157	245731	202
				765551	226					370768	569	247368	1255
				769373	73					372100	569	247406	1255
				770138	166					372141	569	250689	531
				775452	261					373487	655	252747	660
				782289	1132					375279	772	253265	996
				782292	1132					375307	772	253362	996
				784553	149					375309	772	255613	624
				785473	912					375716	681	255614	624
				787689	912					376872	1298	255615	624
				789637	475					376879	1298	255868	624
				791000	458					380639	1001	255869	624
				793538	492					380756	1001	256543	141
				793635	492					381027	1014	256544	141
				795558	636					381028	1014	256684	141
				795728	636					381319	1014	256685	141
				795729	636					381663	356	256732	141
				800188	509					381887	356	256754	141
				801399	1113					384342	1201	260434	1143
				802291	1113					384499	1201	260435	1143
				803416	156					384560	1201	260461	1143
				805325	666					384594	564	260587	1143
				806326	944					387313	1168	260588	1143
				808642	233					387378	1168	263480	191
				813774	227					389139	241	263482	191
				817084	1160					390740	733	263799	152
				817732	1160					390741	733	266497	588
				822550	770					390742	733	267138	1056
				825352	1016					393892	273	267709	689
				825847	1016					394341	273	269752	70
				828829	804					396301	308	269827	70
				833186	1027					398234	244	269836	70
				834214	819					398334	244	269837	70
				838114	245					398335	244	270100	70
				838538	151					399141	1154	270590	183
				841511	423					399142	1154	270946	183
				841547	423					399259	1154	271096	183
				846322	594					401184	1335	271586	383
				850887	730					401624	1335	272258	1011
				855439	802					401812	1335	274201	1011
				857576	173					408089	860	274582	355
				879813	1348					408090	860	274583	355
				887215	1046					409874	294	277419	1051
				890316	1115					409875	294	277646	1051
				891136	1198					413470	1318	278886	782
				899593	505					415358	451	280461	871
				901947	1324					417610	88	280511	871
				905326	757					418064	88	281189	524
				905327	757					418065	88	281423	524
				908255	1334					418178	436	282359	263
				912526	384					418179	436	282380	263
				915570	1339					419670	436	282425	263
				916340	134					421479	401	282457	263
				916993	134					423346	1312	283087	263
				917729	1279					424321	699	284469	326
				917731	1279					424677	699	284498	326
				921471	1015					425439	699	284597	326
				921477	1015					425599	699	284598	326
				921478	1015					425918	1119	284666	326
				922975	615					425919	1119	284671	326
				925754	1301					426456	116	284672	326
				927797	521					426458	116	284673	326
				928390	521					426579	116	284760	326
				931099	90					426797	116	284942	326
				937171	605					426891	116	285026	326
				939093	737					428701	807	286536	343
				939094	737					430005	325	286799	258
				947628	982					430012	325	286800	258
				950864	1103					432781	940	287688	181
				952297	344					432782	940	287797	72
				960219	193					432783	940	287803	72
				965587	89					433427	547	288007	72
				965614	89					433444	547	289081	1031
				968189	1355					433913	547	289082	1031
				969114	1030					436645	496	296145	197
				971031	916					440583	1045	296146	197
				971148	916					440584	1045	296922	691
				971187	916					441639	445	296923	691
				980302	741					442992	683	296925	691
				980681	741					442993	683	297857	132
				980978	741					444185	1161	300568	132
				985442	829					446626	1208	300620	132
				989269	1077					452260	1185	300625	132
				995093	404					454665	958	300737	132
				998415	477					455006	958	302725	585
				999270	584					455060	1274	302728	585
				999445	623					455061	1274	302894	585
				1003434	959					456435	717	303001	372
				1006151	471					457476	304	306236	320
				1006990	471					458891	1275	307122	320
				1007416	260					458899	1275	307369	320
				1007512	260					459239	1275	307528	320
				1010118	614					459891	942	308226	685
				1013029	269					461382	1107	308312	682
				1013052	269					461689	1290	308750	17
				1013053	269					461794	1290	309357	17
				1014009	177					462409	1290	309358	17
										463378	533	311052	22
										464723	1344	312582	668
										467064	1131	313327	739
										468807	974	314753	906
										470239	1093	314901	906
										477010	1273	316408	972
										477017	1273	317637	264
										477889	218	321149	752
										479682	818	322413	675
										479834	818	324497	904
										480029	818	324817	904
										480030	818	325504	712
										484126	888	326562	1094
										485902	776	328278	189
										485903	776	328377	189
										486851	963	328485	189
										493031	714	329285	795
										493676	29	329286	795
										494205	1117	330044	1139
										494646	142	330045	1139
										494700	142	330300	1268
										494702	142	331942	706
										498519	468	331947	706
										499088	390	331981	616
										499410	390	332678	1078
										499443	390	336741	348
										499701	390	338741	861
										499702	390	339417	556
										500554	301	339418	556
										501061	883	339420	556
										501063	883	339422	556
										501203	883	339496	556
										501220	883	340800	848
										504474	255	340801	848
										504478	255	341499	528
										504612	255	342078	528
										506300	1137	342079	528
										508077	560	342586	528
										508382	560	343989	196
										508383	560	346568	595
										510302	970	350108	131
										510303	970	350495	131
										510399	970	351525	38
										510519	970	351526	38
										510681	970	352760	671
										510735	970	352761	671
										510736	970	357729	842
										510858	970	358348	1066
										512601	897	358432	1066
										513919	385	359093	98
										517078	417	359326	98
										518726	512	361060	545
										518727	512	361061	545
										519794	765	361063	545
										519795	765	362470	545
										520289	1258	363735	731
										523265	331	364934	370
										524650	292	366028	1343
										528353	563	366244	1343
										528354	563	367405	1343
										530314	1213	367433	1343
										531146	786	367763	232
										533200	1215	367764	232
										533372	710	371302	569
										533629	710	371303	569
										533630	710	371960	569
										536556	862	371988	569
										536748	862	372098	569
										543200	223	372100	569
										543202	223	372828	569
										545494	619	373028	569
										547854	979	375225	772
										552053	1050	375681	681
										552054	1050	376391	1298
										556115	339	376396	1298
										556958	1269	376954	1298
										557042	1269	377049	1298
										557054	1269	377268	103
										558389	656	377283	103
										558774	1155	377284	103
										558846	1155	377838	443
										559857	265	377839	443
										560436	265	377922	443
										564296	296	378025	443
										565084	593	378316	443
										565161	593	378346	443
										565197	593	382082	1179
										567034	729	382083	1179
										567188	729	383707	1201
										568160	259	384361	1201
										568161	259	384487	1201
										568550	259	384499	1201
										570519	259	384721	564
										570993	603	385145	1000
										572881	71	385154	1000
										574629	534	385160	1000
										574683	534	387652	1168
										574684	534	387661	1168
										574686	534	388589	241
										576030	1099	388794	241
										576031	1099	388820	241
										577705	321	388832	241
										577707	321	388998	241
										577708	321	389000	241
										578047	321	389021	241
										578048	321	390618	733
										578344	1116	390720	733
										578918	1116	390740	733
										580415	66	390741	733
										580447	66	390742	733
										580450	66	393580	273
										581246	1304	394340	273
										586623	1308	396347	308
										587036	1308	399538	1154
										587195	247	399978	178
										587661	247	400197	178
										588481	766	400900	178
										589505	854	400935	1335
										589506	854	400936	1335
										590528	854	400937	1335
										591889	700	400956	1335
										592051	700	400957	1335
										594211	266	401326	1335
										595187	266	401376	1335
										595190	266	401377	1335
										595601	266	401515	1335
										596424	649	401547	1335
										596442	649	402176	248
										598451	85	402579	485
										598452	85	404822	1262
										598468	85	407132	887
										598470	85	407760	860
										598472	85	407812	860
										598473	85	407813	860
										600340	1169	408917	44
										600341	1169	408997	44
										604197	1219	408998	44
										607314	858	409610	694
										607354	858	409789	294
										608987	946	409874	294
										612672	634	409875	294
										612684	634	411481	1184
										614433	634	414363	1054
										614752	249	414375	1054
										615765	316	415082	451
										616095	745	415163	451
										618193	780	415346	451
										618207	780	416041	446
										621500	418	416042	446
										625180	1288	420288	251
										626360	165	420289	251
										627695	693	420860	723
										630263	514	421474	401
										630945	514	421870	401
										636119	962	422000	401
										639118	983	422833	285
										643290	557	422834	285
										643539	557	423346	1312
										652125	335	424319	699
										658061	236	424321	699
										660785	338	424592	699
										662993	2	424685	699
										663419	2	425718	699
										663677	153	425749	699
										664046	975	426289	116
										664052	975	426310	116
										666426	400	426437	116
										667219	350	426472	116
										667306	350	426570	116
										667330	350	426583	116
										672061	1083	426609	116
										672139	1083	426661	116
										672205	1083	427382	116
										676872	1140	428438	375
										680150	504	428504	807
										680151	504	428510	807
										680152	504	428511	807
										680154	504	428567	807
										680167	504	428568	807
										680725	100	428765	807
										680836	100	428766	807
										680968	769	429025	807
										685737	240	431480	325
										686168	240	433914	547
										687834	289	436611	496
										687942	487	436612	496
										688681	487	436749	496
										690787	297	438506	1142
										694204	1124	440049	1045
										694217	1124	440199	1045
										694269	1124	440200	1045
										701481	436	441394	445
										701751	97	441396	445
										704486	868	441477	445
										705274	994	441478	445
										705674	994	441948	234
										706506	1126	441959	234
										707818	1257	443118	683
										709521	880	447811	841
										709544	880	447812	841
										712697	1333	449606	576
										718023	139	451236	126
										718341	139	451865	1185
										718587	792	453071	1185
										718843	792	454869	958
										720770	546	455039	1274
										721509	546	455279	1274
										722190	159	456387	717
										722901	222	457334	174
										722902	222	457368	174
										726957	1329	457476	304
										727353	1199	458430	1178
										727874	1243	458454	1178
										729871	913	459414	942
										731109	61	459894	942
										731110	61	462229	1290
										731136	61	463261	533
										731381	61	463271	533
										732993	481	464746	1344
										734157	396	465237	1344
										736952	522	468470	1146
										736953	522	468471	1146
										737525	672	470193	1093
										742785	1177	470533	1049
										747091	68	470945	1049
										747092	68	471948	1084
										747862	825	472416	60
										752803	104	477017	1273
										753349	870	479354	237
										757087	176	479681	818
										758451	658	479852	818
										762182	169	480284	818
										762366	847	480564	818
										762577	847	482101	607
										765941	226	483236	888
										766293	853	483787	888
										767140	1187	484613	744
										768775	73	484619	744
										770623	166	484779	744
										772123	617	484961	744
										772321	617	484963	744
										772325	617	485484	952
										776052	1182	485536	952
										776117	1182	486266	776
										776183	1281	486283	776
										778648	1164	486329	776
										778681	1164	487249	963
										782289	1132	490724	526
										782292	1132	490961	526
										782557	1132	490962	526
										784358	149	491000	526
										784541	149	491376	526
										785007	149	491558	1087
										785895	814	492309	1087
										785942	814	492717	1249
										785976	814	492718	1249
										785985	814	494206	1117
										786437	794	494700	142
										786562	794	494702	142
										788194	1034	495864	112
										788437	1034	495936	112
										789127	346	496609	874
										789128	346	499216	390
										793914	492	499411	390
										793915	492	499442	390
										793916	492	499484	390
										793917	492	499578	390
										796508	636	499914	1217
										796589	636	501721	638
										800398	509	501722	638
										800399	509	502271	31
										800406	509	504474	255
										800503	509	504478	255
										803060	156	504615	255
										803061	156	504616	255
										804519	376	507980	696
										805433	666	508040	560
										805529	673	508481	560
										805943	673	508611	560
										805991	673	509468	661
										808279	632	509469	661
										810927	877	509600	110
										811462	877	509985	110
										812499	877	512840	1264
										813317	924	515325	417
										813318	924	516445	417
										813854	227	516446	417
										813860	227	516482	417
										813861	227	516483	417
										816626	227	517822	162
										816627	1160	517975	162
										817384	1160	517977	162
										818012	1160	519670	140
										820196	881	519794	765
										820228	881	519795	765
										822143	549	519820	765
										822341	549	521161	1006
										822881	770	521616	951
										823410	536	522661	573
										825925	811	522831	331
										825934	811	523086	331
										826770	42	524623	292
										827036	42	525021	550
										830544	195	525050	550
										836136	965	525293	550
										836976	1203	526244	129
										843897	1053	526270	129
										844191	901	527977	563
										847296	92	528146	563
										847297	92	528185	563
										849602	300	528200	563
										849631	300	528353	563
										851006	730	528354	563
										852767	651	528370	563
										853717	74	528413	563
										857565	173	529653	1213
										858731	559	529654	1213
										858941	1225	530750	1213
										862279	850	533224	710
										863316	1017	533992	921
										865906	306	533993	921
										867404	1232	534725	862
										867405	1232	535062	862
										868278	1008	536135	862
										869224	1251	536327	862
										870246	907	536558	862
										871027	856	536559	862
										877494	185	536560	862
										877495	185	536768	862
										877521	185	536852	862
										877941	1038	537758	953
										877969	1038	538439	1013
										882362	1287	538877	1013
										883495	1029	539393	806
										884620	1029	540352	905
										884621	1029	540381	1319
										886479	360	540394	1319
										886879	1046	540395	1319
										889981	1115	541950	923
										892885	761	541956	923
										892886	761	542528	397
										902582	541	544625	577
										904303	757	545453	1289
										904374	757	545918	619
										904880	757	545999	846
										906073	474	548007	979
										914454	929	548008	979
										914629	929	549400	513
										915702	1339	550666	625
										916443	134	550667	625
										916529	134	553770	956
										916531	134	553935	1035
										920221	1227	554005	1035
										922850	615	554739	926
										924521	498	554814	926
										924955	1216	557107	1269
										925336	1345	557814	656
										925474	1345	558077	656
										932612	15	558462	656
										933870	15	559637	265
										934756	882	559993	265
										936751	605	560496	265
										940057	95	565201	593
										941693	988	565210	593
										942547	552	565211	593
										942605	552	565556	593
										943791	1112	565678	593
										943792	1112	565679	593
										944143	1112	566094	593
										946449	1221	566363	729
										947424	1354	566862	729
										947425	1354	568251	259
										947483	1354	568697	259
										949781	779	569392	259
										949784	779	569437	259
										950586	1103	569612	259
										951077	791	570519	259
										951078	791	571152	603
										951130	791	571804	71
										954030	147	571911	71
										954031	147	571983	71
										955922	295	573653	530
										959158	820	574028	534
										961658	50	574369	534
										963180	1100	574654	534
										965011	89	577653	321
										965026	89	577707	321
										965027	89	577777	321
										965922	89	577786	321
										965947	89	578214	1116
										967536	1355	578217	1116
										967537	1355	578918	116
										972624	1138	579913	26
										973620	740	580220	66
										975059	466	581401	457
										975852	838	581402	457
										980458	741	582663	800
										985441	829	582767	800
										988134	783	583068	6
										988135	783	583894	6
										993118	184	585188	199
										999391	584	586713	1308
										999396	584	587099	1308
										999398	584	587100	1308
										999644	623	587337	247
										999915	623	587385	247
										1002023	228	587422	247
										1002758	228	588814	766
										1002783	228	588929	766
										1005535	471	589019	766
										1005566	471	590760	854
										1006187	471	590872	854
										1006586	741	590902	854
										1008730	138	590903	854
										1010368	614	590907	854
										1011034	21	594933	266
												595088	266
												595241	266
												596356	118
												598451	85
												598452	85
												598468	85
												598470	85
												598472	85
												598473	85
												598528	85
												598529	85
												598580	85
												599232	85
												600441	1169
												600519	1169
												600537	1169
												601595	1133
												601598	1133
												601790	1133
												607167	858
												608670	946
												610375	305
												611561	934
												612141	1150
												612155	1150
												614148	634
												614150	634
												614430	634
												614448	634
												614449	634
												615573	316
												615853	316
												615879	316
												615881	316
												615897	316
												616030	745
												616416	745
												618620	214
												620732	379
												620973	418
												621506	418
												622682	709
												624906	1288
												625631	165
												625632	165
												626328	165
												626981	165
												626982	165
												627401	693
												627432	693
												627561	290
												628502	992
												629162	514
												632052	708
												633672	413
												635212	246
												635834	962
												636236	962
												636396	962
												636399	962
												637574	962
												639145	983
												639634	1082
												639635	1082
												640502	851
												640615	1222
												641113	1222
												641374	25
												641482	337
												641917	337
												641918	337
												642504	813
												642516	813
												642851	813
												642856	557
												643583	217
												644116	217
												644163	217
												646467	967
												646993	1158
												647385	1158
												647747	873
												648473	470
												648572	470
												648835	561
												651501	207
												651669	207
												651804	207
												651846	335
												651915	335
												652434	51
												653345	1036
												657068	981
												658340	686
												658909	686
												659257	399
												665844	371
												665845	371
												665846	371
												666513	400
												666549	400
												666637	400
												667222	350
												668975	224
												669450	604
												669470	604
												671199	631
												671580	631
												671894	1083
												671895	1083
												671896	1083
												671904	1083
												671918	1083
												671919	1083
												671924	1083
												671946	1083
												671947	1083
												671951	1083
												671978	1083
												671979	1083
												671996	1083
												671997	1083
												671998	1083
												672008	1083
												672009	1083
												672012	1083
												672020	1083
												672047	1083
												672060	1083
												672068	1083
												672069	1083
												672083	1083
												672139	1083
												672140	1083
												672173	1083
												672174	1083
												672186	1083
												672191	1083
												672242	1083
												672258	1083
												672264	1083
												672285	1083
												672293	1083
												672294	1083
												672311	1083
												673660	928
												676625	1140
												679999	504
												680150	504
												680151	504
												680152	504
												680154	504
												680167	504
												680641	100
												684790	857
												684909	857
												685836	240
												685837	240
												685838	240
												685987	240
												686171	240
												686533	579
												689404	635
												689535	635
												689537	635
												692086	272
												694235	1124
												694250	1124
												694251	1124
												694764	1130
												695742	618
												696460	47
												696486	47
												696488	47
												698338	663
												700459	734
												703969	868
												703981	868
												704099	868
												704870	994
												706135	1126
												706141	1126
												706506	1126
												706562	1126
												709924	880
												713617	771
												713751	771
												715601	252
												717450	831
												717633	139
												718024	139
												718164	139
												718261	139
												718262	139
												718599	792
												719536	792
												719551	792
												721548	546
												721549	546
												722577	159
												722727	222
												723623	634
												724363	333
												724366	333
												726240	746
												726957	1329
												727305	1199
												727306	1199
												729098	543
												729578	1237
												730407	913
												730887	61
												730888	61
												731658	61
												731659	61
												732216	135
												732762	1004
												733395	396
												734001	396
												734331	396
												736274	522
												736352	522
												736639	522
												737198	672
												737199	672
												737200	672
												738101	672
												739740	113
												740300	109
												740590	109
												740591	109
												742716	1177
												742839	1177
												742965	448
												744611	707
												745829	476
												749276	345
												752140	104
												752162	104
												752562	104
												752696	104
												752803	104
												752804	104
												754424	1165
												754683	1165
												758311	658
												758752	288
												761803	805
												762497	847
												762504	847
												764829	1156
												764841	1156
												764850	1156
												765063	226
												765493	226
												765550	226
												765551	226
												771472	674
												773368	78
												773369	78
												775450	261
												775452	261
												775474	261
												780748	432
												781254	1147
												782289	1132
												782292	1132
												782908	1132
												782909	1132
												783011	1132
												783817	866
												784054	866
												784055	866
												784056	866
												784540	866
												788311	1034
												788924	1034
												789604	475
												790804	458
												795558	636
												795644	636
												795718	636
												795720	636
												795725	636
												796331	636
												796505	636
												796506	636
												798683	179
												798684	179
												798685	179
												799367	509
												799475	509
												800188	509
												800190	509
												801482	1113
												801645	1113
												802286	1113
												803225	156
												803227	156
												803236	156
												803416	156
												803513	156
												803862	146
												804486	376
												809156	380
												812030	87
												813714	227
												813715	227
												813724	227
												813809	227
												813855	227
												813861	227
												813867	227
												813902	227
												816709	1160
												817384	1160
												817730	1160
												817732	1160
												817940	1160
												818469	598
												818688	598
												821172	284
												822611	770
												822823	770
												823765	536
												824681	536
												826294	811
												826300	811
												826301	811
												826377	811
												826733	42
												828996	804
												829693	195
												831053	275
												831792	13
												831794	13
												831795	13
												831798	13
												831833	13
												831939	13
												831948	13
												833186	1027
												833187	1027
												833223	1027
												836770	1203
												843585	1053
												844706	901
												844879	901
												845443	719
												847310	92
												848230	516
												850765	730
												850879	730
												850996	730
												851004	730
												851006	730
												851026	730
												851702	890
												853385	651
												853386	651
												855076	1220
												855225	802
												855226	802
												855227	802
												856323	171
												856522	171
												856960	121
												858858	1225
												859204	1225
												859345	1225
												859386	1225
												859392	1225
												859733	210
												859735	210
												861062	389
												861494	211
												861496	211
												862240	850
												862348	850
												862476	850
												863091	1017
												863092	1017
												863226	1017
												863421	1017
												864745	955
												864747	955
												865880	306
												865897	306
												868278	306
												870317	907
												871017	856
												871018	856
												871039	856
												871627	253
												871734	253
												877813	1038
												877999	1038
												878017	1038
												878773	1348
												879569	1348
												879812	1348
												880065	1278
												880773	701
												880776	701
												881674	1111
												881732	1111
												881871	1111
												884288	1029
												885304	1029
												885743	287
												887215	1046
												887216	1046
												891136	1198
												891188	1198
												895788	900
												897763	505
												898919	505
												899750	1162
												899752	1162
												899756	1162
												899759	1162
												899761	1162
												901600	1324
												901976	1324
												902038	1324
												902055	1324
												902354	541
												902444	541
												902467	541
												902687	541
												903329	541
												903427	1209
												903428	1209
												905327	757
												905632	757
												905633	757
												906301	474
												906302	474
												907297	1075
												907528	1075
												907783	1075
												907784	1075
												912085	473
												912087	473
												912257	473
												913892	929
												914056	929
												914057	929
												914258	929
												915570	929
												916467	134
												916469	134
												916470	134
												916471	134
												916605	134
												918646	10998
												920050	1227
												920222	1227
												920598	1227
												920770	665
												921478	1015
												921481	1015
												923031	615
												923965	718
												924607	1216
												925266	1345
												925468	1345
												926586	568
												928235	521
												928236	521
												928340	521
												928341	521
												928349	521
												928479	521
												928535	521
												929719	93
												929779	93
												930036	93
												931012	90
												931513	680
												932789	15
												933095	15
												934064	1330
												935920	324
												937261	605
												937534	393
												937549	393
												939807	170
												941190	1316
												941849	552
												942005	552
												942942	314
												943650	314
												944010	1112
												945151	938
												946757	1221
												947087	1354
												947319	1354
												947697	982
												947710	982
												947908	982
												949618	779
												949637	779
												950388	262
												950389	262
												951127	791
												952297	344
												952331	344
												954030	147
												954031	147
												954262	147
												954559	147
												955394	208
												956294	295
												956295	295
												958631	820
												958632	2820
												959088	820
												960516	193
												960981	633
												961051	633
												962303	50
												962305	50
												962396	50
												965281	89
												965623	89
												966626	168
												967241	168
												969039	1030
												969354	1030
												969545	238
												970415	1224
												971031	916
												971110	916
												971314	916
												971443	916
												974501	466
												974502	466
												975821	838
												978379	931
												978587	495
												978655	495
												979179	482
												980285	741
												980338	741
												980958	741
												980959	741
												981227	59
												981344	59
												982451	359
												984482	81
												985169	829
												985249	829
												985250	829
												985379	829
												985442	829
												988149	783
												989269	1077
												989953	1077
												990004	1077
												995811	414
												995812	414
												995819	414
												996009	225
												998296	477
												998359	477
												998416	477
												998547	477
												998628	902
												999051	902
												999052	902
												999144	902
												999145	902
												999270	584
												999271	584
												1001709	228
												1001725	228
												1002060	228
												1002575	228
												1002576	228
												1002908	228
												1002909	228
												1003372	959
												1003904	845
												1003905	845
												1005854	471
												1006799	471
												1007526	260
												1007726	260
												1007914	260
												1009337	138
												1009384	138
												1009385	138
												1010593	614
												1013053	269
												1013415	177
												1013548	177
