# Supplementary material for: The synergistic effect of concatenation in phylogenomics: the case in Pantoea
Source: PeerJ. 2019 Apr 16;7:e6698. doi: 10.7717/peerj.6698 (PMC6474361; doi:10.7717/peerj.6698)
Supplement: File S7 — Data pertaining to the randomised subset datasets constructed from 20, 50, 60, 70, 80, 90, 100, 110 and 120 randomly selected genes. [file peerj-07-6698-s013.xlsx]

## Sheet: 20 genes
Supplementary File S7.1 Randomised gene subset datasets constructed with 20 genes
Dataset 1					Dataset 2					Dataset 3					Dataset 4					Dataset 5					Dataset 6					Dataset 7					Dataset 8					Dataset 9					Dataset 10
FILE	START POSITION SUPERMATRIX	END POSITION SUPERMATRIX			FILE	START POSITION SUPERMATRIX	END POSITION SUPERMATRIX			FILE	START POSITION SUPERMATRIX	END POSITION SUPERMATRIX			FILE	START POSITION SUPERMATRIX	END POSITION SUPERMATRIX			FILE	START POSITION SUPERMATRIX	END POSITION SUPERMATRIX			FILE	START POSITION SUPERMATRIX	END POSITION SUPERMATRIX			FILE	START POSITION SUPERMATRIX	END POSITION SUPERMATRIX			FILE	START POSITION SUPERMATRIX	END POSITION SUPERMATRIX			FILE	START POSITION SUPERMATRIX	END POSITION SUPERMATRIX			FILE	START POSITION SUPERMATRIX	END POSITION SUPERMATRIX
gene527	1	98			gene70	1	407			gene515	1	230			gene556	1	694			gene1119	1	144			gene886	1	150			gene665	1	316			gene657	1	212			gene1049	1	434			gene913	1	405
gene850	99	340			gene850	408	649			gene1339	231	489			gene527	695	792			gene1078	145	650			gene474	151	441			gene326	317	635			gene1059	213	579			gene1128	435	709			gene1344	406	870
gene33	341	609			gene69	650	907			gene63	490	850			gene975	793	935			gene181	651	966			gene270	442	757			gene1073	636	1042			gene454	580	1057			gene223	710	949			gene72	871	1178
gene72	610	917			gene678	908	1050			gene1355	851	1479			gene127	936	1258			gene940	967	1363			gene454	758	1235			gene541	1043	1450			gene759	1058	1139			gene395	950	1154			gene753	1179	1269
gene1194	918	1059			gene487	1051	1561			gene123	1480	1922			gene688	1259	1596			gene318	1364	1648			gene276	1236	1643			gene475	1451	1584			gene696	1140	1460			gene738	1155	1251			gene842	1270	1554
gene1087	1060	1425			gene4	1562	2183			gene1253	1923	2112			gene815	1597	1841			gene601	1649	1872			gene464	1644	1890			gene601	1585	1808			gene46	1461	1943			gene1203	1252	1740			gene505	1555	2380
gene689	1426	1813			gene182	2184	2623			gene711	2113	2396			gene33	1842	2110			gene1015	1873	1984			gene529	1891	2223			gene926	1809	2070			gene792	1944	2519			gene1150	1741	2051			gene1317	2381	2463
gene554	1814	2549			gene583	2624	2867			gene1069	2397	2572			gene1166	2111	2208			gene1016	1985	2375			gene1350	2224	2379			gene1117	2071	2173			gene433	2520	2981			gene1250	2052	2294			gene778	2464	2954
gene1027	2550	3085			gene1086	2868	2996			gene162	2573	2989			gene42	2209	2364			gene633	2376	2648			gene535	2380	2628			gene859	2174	2387			gene21	2982	3217			gene879	2295	2465			gene165	2955	3398
gene1203	3086	3574			gene321	2997	3337			gene802	2990	3203			gene904	2365	2773			gene173	2649	2990			gene1106	2629	2769			gene604	2388	2618			gene620	3218	3514			gene325	2466	3625			gene1272	3399	3681
gene760	3575	4035			gene673	3338	3642			gene595	3204	4366			gene495	2774	2946			gene719	2991	3229			gene771	2770	3652			gene528	2619	3206			gene1257	3515	4173			gene151	3626	3952			gene349	3682	3940
gene633	4036	4308			gene999	3643	3927			gene459	4367	4922			gene1336	2947	3525			gene358	3230	3596			gene881	3653	3878			gene119	3207	3477			gene128	4174	4492			gene356	3953	4112			gene866	3941	4316
gene1170	4309	4393			gene257	3928	4204			gene719	4923	5161			gene151	3526	3852			gene343	3597	3875			gene259	3879	4846			gene456	3478	4032			gene407	4493	4633			gene669	4113	4212			gene1079	4317	4897
gene1110	4394	4775			gene1272	4205	4487			gene382	5162	5317			gene577	3853	4380			gene1241	3876	3985			gene434	4847	4916			gene893	4033	4292			gene196	4634	5214			gene1042	4213	4688			gene56	4898	5233
gene538	4776	4988			gene905	4488	4592			gene721	5318	5496			gene1001	4381	5254			gene1275	3986	4413			gene1234	4917	5095			gene64	4293	4637			gene233	5215	5379			gene269	4689	4840			gene1293	5234	5434
gene907	4989	5255			gene784	4593	4839			gene218	5497	5700			gene275	5255	5692			gene1345	4414	4552			gene28	5096	5293			gene942	4638	4915			gene169	5380	5633			gene1321	4841	5431			gene718	5435	5706
gene210	5256	5351			gene1338	4840	5087			gene115	5701	5903			gene1031	5693	6052			gene128	4553	4871			gene679	5294	5416			gene928	4916	5389			gene1302	5634	5724			gene332	5432	5648			gene906	5707	5891
gene1311	5352	5608			gene1144	5088	5262			gene645	5904	6295			gene430	6053	6224			gene918	4872	4953			gene93	5417	5878			gene1337	5390	5855			gene77	5725	5836			gene854	5649	6270			gene1144	5892	6066
gene1052	5609	5757			gene147	5263	5466			gene50	6296	6636			gene235	6225	7044			gene89	4954	5331			gene430	5879	6050			gene551	5856	6048			gene715	5837	6169			gene180	6271	6428			gene840	6067	6287
gene943	5758	5966			gene178	5467	5834			gene135	6637	6859			gene559	7045	7152			gene370	5332	5560			gene1024	6051	6316			gene34	6049	6210			gene484	6170	6517			gene840	6429	6649			gene648	6288	6436
Data matrix					Data matrix					Data matrix					Data matrix					Data matrix					Data matrix					Data matrix					Data matrix					Data matrix					Data matrix
>P_brenneri					>P_brenneri					>P_brenneri					>P_brenneri					>P_brenneri					>P_brenneri					>P_brenneri					>P_brenneri					>P_brenneri					>P_brenneri
MTKSELIERLAGQHTHIPAKVVEDAVKEMLEHMATTLAQGERIEIRGFGSFSLHYRAPRTGRNPKTGDKVDLEGKYVPHFKPGKELRDRANIYG--------MRVTRLITILLLNALGVVLFLSWYLPPEHGFWFGIDKAIFFGFNSQMIIHSGFALLVAITNYRGFDAVSLLAMGLLYLSIWRGETPQARRRMLAIGITMLLTAVVLNQLGHLLPVKHSSPTLFFENVHRVSELTGIPAKDASKDSFPGDHGMMLMIFACFIWRYFGFGRFLIAAAIVVIFSLPRVMAGAHWFTDIAVGSLSVVLVGLSWWLLTPASDALVNWFYRKLPGKYKPLS---MPELPEVETSRRGIEPHLVGETILHAVVRNSRLRWPVSQEILSLSDQPVLSVQRRAKYL…					MQTQGIKKIVLAYSGGLDTSAIIPWLKENYGGCEVVAFVADIGQERSDLEGVEKKALQSGASECHVVDLREEFISDYVYPVLQTGALYEGTYLLGTSMARPIIAKAQVELALKVGADALCHGATGKGNDQVRFETTYTALAPQLKVVAPWREWNLRSREALLDYLKERNIPTTASLEKIYSRDENAWHISTEGGVLESPANAPNKDCWVWTVDPLEAPDQPEEVTVTVEKGRVVAVNGEKLSPFQCLEKLNVIGAKHGVGRIDIVENRLVGIKSRGCYETPGGTIMVNALRAVEQLVLDRDSFKWREQLGQEMSYVVYDGRWFAPLRKSIQAAAESLAEEVNGEVVLQLYKGQATATQKRSPNSLYSEEFATFGEDEVYDHRHAGGFIRLFSLSSRIRA…					-----------------MALREPNGLLAMGGDLSPARLLNAYQHGIFPWFSPGDPILWWSPDPRAVLLPEHFHLSRSMKRFHQRSPYRVTMNEAFAEVIDGCATGREEGTWITFEVKRAWLRLYESGHAHSIEVWDEHKLVGGMYGLALGQIFCGESMFSRQENASKTALLVFCQHFIKHQGRLVDCQVLNPHTASLGALEIPRADYLQYVQSLAWQPVSDGCWRTQTLF--MSIATASADKIQVRNLNFYYGKF					-------MGKRLAQHPYNRVRLMAAGVEVSGDKHEYLIPFNQLLDITCKRGLVWGELEFLLADEKVVRLHGTEWQETQRFHHYLLQSWQQWSLEMSEVCSEVLQALRSAIEAFSTQDRWLNRSELQDLKAQIVKQFDALPLPLTRLNEFATCRDDLEFCQRWLEQGETALRQRNRDWTAAMLTRYHDFFASVETTPLNTAQSEAVVNGEASLLVLAGAGSGKTSVLVARAGWLMQRRLASADQILLLAFGRQAAE					MAMRLNDDLETDGEMHEINVTPFIDVMLVLLIIFMVAAPLATVDVRVNLPASTSAPQPRPEKPVYLSIKADKQLYVGNDQVTPESLVSVLTGQTGGNKETTIFFQADKSVDYETLMSVMDQLRTAGYLKIGLMGMETVKK----MSEQQPQSADAALELNNELKTRREKLSALRANGVAFPNDFRRDTLSNQLHERYDEKSNEELEDLGIEVSVAGRMMTRRIMGKASFVTLQDVGGRIQLYVSRDDLAEGIYNEQFKKWDLGDILGARGKLFKTKTGELSIHCSELRLLTKALRPLPDKFHGLADQETRYRQRYLDLIANDESRNTFKIRSQIMAGIRQFMVSRDFMEVETPMMQVIPGGASARPFITHHNALDIDMYLRIAPELYLKRLVVGGFDRV…					MANESGSTSWFRMFQRGQHYMKTWPADKRLAPVFPENRVSSATRFAIRFMPPLAIFTLTWQIAMGGQLGPAVATALFACSLPMQGLWWLGKRSITPLPPTLLNWFHEVRAKLEEAGQAIAPVEGKPTYQALADVLKRAFKQLDRTFLDDLMSILIDKNTKVICQGFTGGQGTFHSEQALAYGTQLVGGVTPGKGGTTHLGLPVFNTVREAVEATGATATVIYVPAPFCKDGILEAIDAGIKLIITITEGIPTLDMLTVKVKLDEAGVRMIGPNCPGVITPGECKIGIMPGHIHQPGRVGIVSRSGTLTYEAVKQTTDIGYGQSTCVGIGGDPIPGSNFIDILKMFQDDPQTEAIVMIGEIGGSAEEEAAAFIKEHVTKPVVGYIAGVTAPKGKRMGHAG…					----MARYDLVSDMHQCVNDLEQALGELRQQIEAQPLLIARVFSLPPIVKGREHEAITQIAVEQHLGQHALTLALNHYCRLFMQHQSEQLSTKAAVRLPGALCIECDEQREAEISALVDSINQLKARLEQLITVESGLPSEARFEFVHQHLRGLITLNAYRTITLLSAPDSLRFGWANKHIIKNMQREEVIAQLEKSLKAGRAQAPWSREQWAEKVQEELASVRALPASARLKIKRPVKVQPVARVWRAEQKKQT					VNQTKRNEILRRLQQNNPHPTTELNFSSPFELLIAVLLSAQATDVSVNKATARLYPVANTPAAMLALGVEGVKEYIKTIGLFNSKAENVIKTCRILLEQHNGEVPEDRAALEALPGVGRKTANVVLNTAFGWPTIAVDTHIFRVCNRTHFAPGKNVEQVEQKLLKVVPAAYKVDCHHWLILHGRYTCVARKPRCGACLIEDLCEYPDKVD--MNKVLLYCRPGFEKECAAEISAKAAEREVYGFPRVKDDSGYVLFECYQFEDAERLVRELPFDDLIFARQMLVVGELLRDLPQEDRITPIVGMLTGVVEKGGELRVEVPDTNEAKELTKFCRKFTVPLRSALRESKILLNYESPKRPVVHVFFIAPGTCYVGYSLPENSSSFYMGIPRLKFPSDAPSR…					MSKIVKVIGREIIDSRGNPTVEAEVHLEGGFVGLAAAPSGASTGSREALELRDGDKSRFLGKGVTKAVAAVNGPIAEAVKGKDAKDQANIDKIMIDLDGTENKSNFGANAILAVSLAAAKAAAASKGQPLYEHIAELNGTPGKYSMPLPMMNIINGGEHADNNVDIQEFMIQPVGASNVKEAIRMGSEVFHNLAKVLKSKGMSTAVGDEGGYAPNLGSNAEALAVIAEAVKAAGYELGKDITLAMDCAASEFY--KDGKYVLAGEGGKAFTSEEFTHFLEDLTKQYPIVSIEDGLDESDWDGFAYQTKVLGDKIQLVGDDLFVTNTKILKEGIEKGIANSILIKFNQIGSLTETLAAIKMAKDAGYTAVISHRSGETEDATIADLAVGTAAGQIKTGSM…					MSAFWITLLLLLLAACVLFLAAGWRQRQASAGDRDRLNQRFYHQRLSELAEDEEQGVVAERPVMERELQQTLLADIPPT-QTAQAH-SSSRWILLPGLIVLLLVSLGTYLKVGGLAQLTGWMQVQQDYPALRARLMDPAAKPLTMEELARLQLGLRSALQSEPDNLNDWTMLGRLGMVLNNASIASQAFERALQLAPNDPGLKQDYAEVLTRSSDPQDNRQAALLLHELLKADRHNLRTLGLLAFNAFEQQQYDQAIDAWQTLLTLLPANDERRVMIARSIEQAKTAAGQQSSQLALSISLTPQAEKILPQGGVLYISVTDGVSPVPVAVKRLPLSHFPLSLTLDDSNAMMPDRLLSAQHQLQVRARISRDGSANARSGDWFGLSAVMPWDAISRWQ--…
>P_dispersa					>P_dispersa					>P_dispersa					>P_dispersa					>P_dispersa					>P_dispersa					>P_dispersa					>P_dispersa					>P_dispersa					>P_dispersa
MTKSELIERLAGQHTHIPAKVVEDAVKEMLEHMATTLAQGERIEIRGFGSFSLHYRAPRTGRNPKTGDKVELEGKYVPHFKPGKELRDRANIYG--------MRTSRLITILLLNALGVMLFMSWYLPPEHGFWFALDKGIFFGFNDQMVDHHGFALLVAITNFRGFDAVSLLAMGLLYLWFWRRETPQGRRRMLAIGITMLLTAVILNQLGHLLPVKHASPTLFFDNVHRVSELTGIPAKDASRDSFPGDHGMMLIIFACFMWRYFGFRAFLMGLLIVVLFSLPRVMAGAHWFTDIAVGSLSVVLVGLSWWLLTPASDKLVNWLYRSLPGKYKPQA---MPELPEVETSRRGIEPHLVGETILHAIVRNPRLRWPVSHEIHALSDQLVLSVQRRAKYL…					MSTQNIKKIVLAYSGGLDTSAIIPWLKENYGGCEVVAFVANIGQDPADLEGVEKKALQSGASECHVVDLREEFISEYVYPVLQTGALYEGTYLLGTSMARPIIAKAQVELALKVGADALCHGATGKGNDQVRFETTYTALAPQLKVVAPWREWNLRSREALLDYLKERNIPTTASLEKIYSRDENAWHISTEGGVLESPWNAPNKDCWVWTVDPLEAPDQPENVTVSVEKGQVVAVNGEKLSPFQCLEKLNALGAKHGVGRIDIVENRLVGIKSRGCYETPGGTIMVNALRAVEQLVLDRDSFKWREQLGQEMSYVVYDGRWFAPLRQSIQAAAASLAELVNGEVVLQLYKGQATAIQKKSANSLYSEEFATFGEDEVYDHRHAGGFIRLFSLSSRIRA…					MRLVQLSRDSLNFPPPEMALREPNGLLAMGGDLSPARLMNAYQRGIFPWFSPGDPILWWSPDPRAVLLPESFHLSRSMARFHRRSPYRVTMNHAFAQVVEGCASGRQEGTWITFEVKRAWLRLYELGHAHSIEVWQDQRLVGGMYGLALGQIFCGESMFSRAENASKTALWVFSQHFIAHQGRLIDCQVLNPHTASLGAVEIPRVDYLQYVQTLAWQPVQAGCWQTQTLF--MSMATPSAGKIQVRNLNFHYGKFHALKNINLDIAKNQVTAFIGPSGCGKSTLLRTFNKMYSLYPEQRAEGEILLDGDNILASHQDIALLRARVGMVFQKPTPFPMSIYDNIAFGVRLFEKLSRADMDERVQWALSKAALWNETKDKLHQSGYSLSGGQQQRLCIARG…					MELKATSMGKRLAQHPYNRVRLLAAGVEVSGDRHEYLIPFNQLIGITCKRGLVWGELEFLLPEEKVVRLHGTEWQETQRFYHYLQQAWQQWSLEMSEISAQVLSALQQEIVAFTGQDRWLKRSELAAVKETITRQFSALPLPLARLEEFDNCRTLWRFCQQWLEQGESAIRQRNREWSARVISDNHAFFSTVETTPLNPSQCEAVVNGEDALLVLAGAGSGKTSVLVARAGWLLQRKLAQPEQILLLAFGRQAAEEMNDRIQTRLGESAIQARTFHALALHIIREGSNKQPVISRLESDSSARRQLLIENWREQCNSKKAQASGWRQWLQEELAWDVPEGPFWQDDKLAQRLAVRLERWLGLMRMHGGAQAAMIADVPEPLRDNFTKRVRLMAPLLKAW…					MAMRLNDDAVGDGEMHEINVTPFIDVMLVLLIIFMVAAPLATVDVRVNLPASTSAPQPRPEKPVYLSIKADKQIYIGNDAVTKETLVNALTAQTEGNKETTIFFQADKSVDYETLMSVMDQLREAGYLKIGLMGMETVKK----MSEQQPQSADAALELNNELKARREKLSALREKGVAFPNDFRRDTTSDRLHADYDSKENDELEALGVEVSVAGRMMTRRIMGKASFATLQDVGGQIQIYVSRDDLPEGVYNEQFKKWDLGDILGARGKLFKTKTGELSIHISELRLLTKALRPLPDKFHGLADQETRYRQRYLDLISNDDSRKTFKIRSQIMAGIRQFMVNRDFMEVETPMMQVIPGGASARPFITHHNALDIDMYLRIAPELYLKRLVVGGFDRV…					MANDAGNPGWFGLFQRGQHYMKTWPADKRLAPVFPENRVVTATRFAIRFMPPLAIFTLTWQIALGGQLGPAIATALFACSLPMQGLWWLGKRSVTPLPPTLLHWFHEVRAKLEEAGQAIAPVDGKPTYQALADVLKRAFKQLDRTFLDDLMSILIDKNTKVICQGFTGGQGTFHSEQALAYGTQLVGGVTPGKGGTTHLGLPVFNTVREAVEATGATATVIYVPAPFCKDGILEAIDAGIKLIITITEGIPTLDMLTVKVKLDEAGVRMIGPNCPGVITPGECKIGIMPGHIHQPGRVGIVSRSGTLTYEAVKQTTDIGYGQSTCVGIGGDPIPGSNFIDILKMFQDDPQTEAIVMIGEIGGSAEEEAAAFIKEHVTKPVVGYIAGVTAPKGKRMGHAG…					----MARYDLVADLHECVNTLERELTALRASVEQQPLLLARVFSLPEIEKGKEHDEINRIAVTQHLGKRAREMALAHYCRLFMQHQSEKLSTKAAVRLPGALCIEADEAASQRLEQQVTTINTLKQRLEQLITVDSGLPSEARFEFVHQHLRGLITLNAYRSVTLLQAPDTLRFGWANKNIIKKVTREAIVEQLERSLKANRAQAPWTREQWAEKVQQELERVRSLPDGAQLKIKRPVKVQPIARLWRASEKKQL					VNKDKRLQILTRLRDANPHPTTELNFSSPFELLIAVLLSAQATDVSVNKATARLYPVANTPAAMLALGVEGVKEYIKTIGLFNSKAENVIKTCRILLEQHGGVVPEDRAALEALPGVGRKTANVVLNTAFGWPTIAVDTHIFRVSNRTRFAPGKNVEEVEQKLLKVVPADFKVDCHHWLILHGRYTCVARKPRCGSCLIEDLCEFTEKTD--MNKVLLYCRPGFEKECAAEISAKAAEREIYGFPRVKDDAGYVLFECYQPEEAEKLIATLPFAELIFARQMLVVGELLRDLPPEDRITPIVGMLSGVVEKGGELRVEVPDTNEAKELTKFCRKLTVPLRASLRDSKILLNYESNKRPVVHVFFIAPGTCYVGYSLPHNNSPFYMGIPRLKFPADAPSR…					MSKIVKVIGREIIDSRGNPTVEAEVHLEGGFVGLAAAPSGASTGSREALELRDGDKSRFLGKGVTKAVAAVNGPIADAVKGKDAKDQANIDKIMIELDGTDNKSNFGANAILAVSLAAAKAAAASKGLPLYAHIAELNGTPGKYSMPLPMMNIINGGEHADNNVDIQEFMIQPVGAKTVKEAIRMGSEVFHHLAKVLKAKGMNTAVGDEGGYAPNLGSNAEALAVIAEAVKAAGYELGKDITLAMDCAASEFY--KDGKYVLAGEGNKAFTSEEFTHFLEDLTKQYPIVSIEDGLDESDWNGFAYQTKVLGDKIQLVGDDLFVTNTKILKEGIEKGIANSILIKFNQIGSLTETLAAIKMAKDAGYTAVISHRSGETEDATIADLAVGTAAGQIKTGSM…					MTGFWITLIILLAAATALFVGAGWRQRQASSGDRDRLNTDFYQQRLRELEHDEAEGVVSERPEMVRELQQTLLTDVPGD-AASRAH-HSSRWVLLPGVIVLVLVSVGVYLKTGGLAQLAGWQSVQQEYPALRARVMDPNAQPLTMEELARLQLGLRTSLQNDPQNLNDWAMLGRLGMVLNNATDASQAFEHALQLAPDNLELQQDYAEVLTRSSDPQDNRQANMLLKDLLKRDHSNVRTLSLLAFNAFEQQQYGEAIGAWQVMLKLLPAGDRRITMIERSIEQAKTDAGQQNSQLALTVSLTPEAEKMLPPGGVLYISVSDGVSPVPVAVKRLPLSHFPLSLTLDDSNAMMPDRLLSAQHQVQVRVRISRDGSANPQSGDWFGLSAVTPWDGHQPMAVE…
>E_tasmaniensis					>E_tasmaniensis					>E_tasmaniensis					>E_tasmaniensis					>E_tasmaniensis					>E_tasmaniensis					>E_tasmaniensis					>E_tasmaniensis					>E_tasmaniensis					>E_tasmaniensis
MTKSELIERLAGQQSHIPAKVVEDAVKEMLEHMATTLSEGERIEIRGFGSFSLHYRAPRTGRNPKTGDKVELEGKYVPHFKPGKELRDRANIYGG-------MNFKRLSLILLLNVLGLALFFSWYLPPQHGQWFIIDKTIFYWFNQHIRTSPALLWLVAITNFRAFDGVSLLAMGGLYLWFWQRETPQGRRRMFAIGIAMLISAVGLNQLGHLIPVSHPSPTRYFPDVNHVAQLTGIPTKDSSADSFPGDHGLMLIIFACFMLRYFTRGAFVVAAMIVLVFAMPRVMIGAHWFTDIAVGSLSIALVGMSWWLLTPASDYLVNWLHRHLPGKYKPTR---MPELPEVETSRRGIEPHLVGATILHAVVRNERLRWPVSPEIHALSDQPVLSVQRRAKYL…					MQDKSIKKIVLAYSGGLDTSAIIPWLKENYGGCEVVAFVADIGQERGDLEGVEQKALQSGASECHVVDLREEFISEYVYPVLQTGALYEGTYLLGTSMARPIIAKAQVELALKVGADALCHGATGKGNDQVRFETTYTALAPQLKVVAPWREWDLRSREALLDYLKERNIPTTASLEKIYSRDENAWHISTEGGVLESPWNAPNKDCWVWTVDPLEAPDQPEQVTIAVEKGRVVAVNGEALSPFGCLDKLNAIGARHGVGRIDIVENRLVGIKSRGCYETPGGTIMVNALRAVEQLVLDRDSFKWREQLGLEMSYVVYDGRWFAPLRKSIQASAEALAEEVNGEVVLQLYKGQVTAIQKKSANSLYSEEFATFGEDEVYDHRHAGGFIRLFSLSSRIRA…					MRLAQLSHESLNFPPPDRALREPNGLLAMGGDLSPQRLLNAYHRGIFPWFAAGDPILWWSPDPRAILLPQHFHLSRSMKRFHQKSPYRVTLNQRFRQVIEGCASDRQEGTWITYEVKLAWQRLHELGHAHSIEVWQDEELVGGMYGLALGQIFCGESMFSQGENASKTALLVFSRYFLQQGGKLIDCQVLNPHTQSLGAQEIPRASYLSYLHSLAFRPLSSECWSPQRLF-IKMVDNTSAQTIQVRNLNFYYGKFHALKNINLDIAKNQVTAFIGPSGCGKSTLLRTFNKMFSLYPDQRAEGEILLDGENILTASQDIALLRARVGMVFQKPTPFPMSIYDNIAFGVRLFEKLSRADMDERVQWALTKAALWMETKDKLHQSGYSLSGGQQQRLCIARG…					MELKATSLGKHLAQHPYNRVRLLTAGIEVSGEKHEYTIPFNQLQAIKCKRGLVWGELEFTLPDGKVVRLHGTEWNETQRFYHYLSQLWQQWSSEMSDVSATVLTAQQHQIHQAERQDRWLSRGDIAGWQRAIHQAFDSLPLPVERLDEFDNCREAYQFCLKWLNDGERQRFNRNAGWTERVLEQHADFFSQVETSPLNASQARAVVNGEDAVLVLAGAGSGKTSVLVARAGWLMMRKQASAGQVLLLAFGRKAAEEMNERIRARLATGDIQARTFHALALHIIQQGSNKSPAISRLETDSDMRQALLIEVWRQQCSEKKAQANGWRQWLTDELKWDLPDGTFWQDDRLARQLASRLERWLGLMRMHGGTQAEMIESAPEAVRLLFTKRVKLMAPLMKAW…					MAMRLNEDLDSNGEMHEINVTPFIDVMLVLLIIFMVAAPLATVDVRVDLPASTSAPQPRPEKPVYLSIKADKQLFIGNNAVSEETLIDTLTQQTEGKKDTTIFFQADKSVDYETLMSVMDKLRQAGYLKIGLMGMETAGK----MSEQQPQAPDAALELNNELKARREKLVALRATGLAFPNDFRRDRTSDQLHAEFDGKENEELEALGIEVSVAGRMMTRRIMGKASFVTLQDVGGRIQLYVSRDDLAEGIYNEQFKKWDLGDILGARGKLFKTKTGELSIHCSELRLLTKALRPLPDKFHGLADQETRYRQRYLDLIANDDSRNTFKIRSQIMAGIRSFMVDRDFMEVETPMMQAIPGGASARPFITHHNALDLDMYLRIAPELYLKRLVVGGFDRV…					MANESGSVGWFKLFQHGQHYMKTWPVDKRLAPMFPENRVSRATRFSIRFMPPVAVFCLSWQIALGGQLGPAVATALFACSLPMQGLWWLGKRSVTPLPPALLGWFHDVREKLQAAGQAIAPIEGKPTYQSLADVLRRAFKQLDKTFLDDLMSILIDKNTKVICQGFTGGQGTFHSEQALAYGTQLVGGVTPGKGGTEHLGLPVFNTVREAVEATGATASVIYVPAPFCKDGILEAIEAGIKLIITITEGIPTLDMLTVKVKLDEAGVRMIGPNCPGVITPGACKIGIMPGHIHQPGRIGIVSRSGTLTYEAVKQTTDIGYGQSTCVGIGGDPIPGSNFIDILKLFQDDPQTEAIVMIGEIGGSAEEEAAAFIKEHVTKPVVGYIAGVTAPKGKRMGHAG…					----MSRYDVIEQLHAVVAQLEHELHGLQQQIMSLRLLAARVFELPDVAKGQEHEPLTQISVRQLTGQPALQRTLAHFNRLFMQHQSEKLSTKAAVRLPGAICMETSSTQSALLREQTETINQLKRRLEQLITVESGLPSEERFEFVHTHLHGLITLNAYRNIALIDSPDSVRFGWANKHIIKKVSLSEILEKLQKSLKAGRAVAPWSREQWAERVEDEIMLLKALPAGAVLKIKRPVKVQPIARVWHAEQQKQI					VNKEKRHEILVRLRDDNPHPTTELNFTSPFELLISVLLSAQATDVSVNKATARLYPLANTPAAILALGVDGVKEHIKTIGLFNSKAENVIKTCRMLLELHGGEVPQNREALEALPGVGRKTANVVLNTAFGWPTIAVDTHIFRVCNRTRFAPGKNVEEVEERLLKVVPKAFKVDCHHWFILHGRYTCVARKPRCGSCLIEDLCEFKEKVEI-MNKILLYCRQGFEKECAAEITAKAAEREIFGFARVKDDSAYVLFECYQQGEAEKLLAELPFSELIFSRQMIVVGELLRDLPPTNRITPVVGMLTGVVEKGGDLRVEVPDTNASKELLKFCRKFTVPLRASLRKDGILLNFESAKRPVVHVFFIASGCCYVGYSLPANNSPLFMGIPRLKFPSDAPSR…					MSKIVKVIGREIIDSRGNPTVEAEVHLEGGFVGLAAAPSGASTGSREALELRDGDKSRFLGKGVTKAVGAVNGPIAEAVTGKDAKDQANIDKIMIDLDGTENKSKFGANAILAVSLAAAKAAAAAKGMPLYEHIAELNGTPGKFSMPLPMMNIINGGEHADNNVDIQEFMIQPVGAKTLKEAVRIGSEVFHNLAKVLKSKGMSTAVGDEGGYAPNLGSNAEALAVIAEAVKAAGYELGKDITLAMDCAASEFY--KDGKYVLAGEGNKAFTSEEFTHFLEDLTKQYPIVSIEDGLDESDWDGFAYQTKVLGDKIQLVGDDLFVTNTKILKEGIDKGIANSILIKFNQIGSLTETLAAIKMAKDAGYTAVISHRSGETEDATIADLAVGTAAGQIKTGSM…					MSGFWLTIALLLLASSMLIVLAANRRATATATDRDALNQRFYHQRLRELEDDEAQGVVDGRPEMVRELQQTLLLDIPEQ-SAAQRH-PIGRWVLLPGIIVLLLVSLGVYFKAGGLPQLMVWQQVKNELPALRAQVMDPNARPLTKEQLARLALGVRSQLQQSPDNVNDWMLLGRLGMVLNNATTASQAFRRALQLSPTDAEARLSYAEVLTRSSDPQDNRQASAMLNEMVSHDESNLRLLGLLAFNDFSLQNYGGAITRWQKMLQLLPPEDGRVVMIRRSIAEAKSVSGVEKSQLALTIGLSNAAEKMLQPGGVLYISITDGHSPIPVAVKKVPLSHFPLSLTLDDGNAMMPDRLLSAQRQLQVRVRISRDGSATPQPGDWYGLSAITPFAGQQQLAVD…
>P_rodasii					>P_rodasii					>P_rodasii					>P_rodasii					>P_rodasii					>P_rodasii					>P_rodasii					>P_rodasii					>P_rodasii					>P_rodasii
MTKSELIERLAGQHTHIPAKVVEDAVKEMLEHMATTLAQGERIEIRGFGSFSLHYRAPRTGRNPKTGDKVDLEGKYVPHFKPGKELRDRANIYG--------MRASRLITILLLNALGIMLFFSWYLPPDHGFWFGIDKAIFFSFNDKMVDHHGFALLVAITNFRGFDAISLLAMGLLYLWFWRRETPQGRRRMLAIGITMLLTAVVLNQLGHLIPVQHASPTLFFDNVHRVSELTGIPAKDASANSFPGDHGMMLIIFACFMWRYFGFRAFLVGLVIVLVFSLPRVMAGAHWFTDIAVGSMSVILVGLSWCLLTPASDKLVNWLNRTLPGKYKPRT---MPELPEVETSRRGIEPHMVGATIMHAIVRNSRLRWPVSHEIHALSDQPVLSVQRRAKYL…					MSTQNIKKIVLAYSGGLDTSAIIPWLKENYGDCEVVAFVANIGQDPADLEGVEKKALQSGASECHVADLREEFISEYVYPVLQTGALYEGTYLLGTSMARPIIAKAQVELALKVGADALCHGATGKGNDQVRFETTYTALAPQLKVVAPWREWDLRSREALLDYLKERNIPTTASLEKSTAVMRTHGT------------SLQKAACW---------------------KAQ-------------------------PTHRTKIA----------GC-----GPLIH-----------------WKRQISQKT--------------------------------------------------------------------------------------…					--------------------------------------MNAYQRGIFPWFSPGDPILWWSPDPRAVMLPESFHLSRSMARFHRRSPYRVTMNHAFPQVLEGCASGRQEGTWITFEVKRAWLRLYELGHAHSIEVWSDHRLVGGMYGLALGQIFCGESMFSRQENASKTALWVFSQHFLVHQGRLIDCQVLNPHTASLGALEIPRVDYLQYVQTLAWQPVLSGCWQTQTLF--MSMATTSADKIQVRNLNFYYGKF					MELKATSMGKRLAQHPYNRVRLLAAGVEVSGDRHEYLIPFNQLISITCKRGMVWGELEFQLPEEKVVRLHGTEWQETQRFFHYLQHAWQQWSQEMSEVSAQVLTALEQEIVAFTQQDRWLKRSELAAVKESITRQFSALPLPLSRMNEFENCRARWQFCQQWLEQGEIAIRQRNREWTAKVIKDYHEFFSNVETTPLNASQCEAVVNGEDVLLVLAGAGSGKTSVLVARAGWLIKRKLAQPEQILLLAFGRQAAEEMNERIQQRLGESAIQARTFHALALHIIREGSNKQPVISKLESDSKARRTLLIDTWREQCNSKKAQASGWRQWLQEELAWDVAEGPFWQDDKLAQRLASRMERWLGLMRMHGGAQAAMIADVPEDFRDNFSKRVKLMAPLLKAW…					MAMRLNDDSVGDGEMHEINVTPFIDVMLVLLIIFMVAAPLATVDVRVNLPASTSAPQPRPEKPVYLSIKEDKQIYIGNDAVTKETLVNALTAQTEGNKETTIFFQADKSVDYATLMSVMDQLREAGYLKIGLMGMESVKK----MSEQQPQSADAALELNNELKARREKLSALREKGVAFPNDFRRDTTSDKLHASYDAKENEELEALGVEVSVAGRMMTRRIMGKASFATLQDVGGQIQIYVSRDDLPEGVYNEQFKKWDLGDILGARGKLFKTKTGELSIHITELRLLTKALRPLPDKFHGLADQETRYRQRYLDLISNDDSRHTFKVRSQIMAGIRQFMVNREFMEVETPMMQVIPGGASARPFITHHNALDIDMYLRIAPELYLKRLVVGGFDRV…					MANDTSNPGWFGLFQNGQRYMKTWPADKRLAPMFPENRVVTATRFAIRFMPPLAIFTLTWQIAMGGQLGPAIATALFACSLPMQGLWWLGKRSITPLPPTLLHWFHEVRTKLEEAGQAIAPVDGKPTYQALADVLKRAFKQLDRTFLDDLMSILIDKNTKVICQGFTGGQGTFHSEQALAYGTQLVGGVTPGKGGTTHLGLPVFNTVREAVEATGATASVIYVPAPFCKDGILEAIDAGIKLIITITEGIPTLDMLTVKVKLDEAGVRMIGPNCPGVITPGECKIGIMPGHIHQPGRVGIVSRSGTLTYEAVKQTTDIGYGQSTCVGIGGDPIPGSNFIDILQMFQDDAQTEVIVMIGEIGGSAEEEAAAFIKEHVTKPVVGYIAGVTAPKGKRMGHAG…					----MSRYDLVADLHACVNALELGLSTLRQQVEQQPLLIARAFSLPEIEKGHENDEIERIAVTQHLGQKARDMALAHYCRLFMQHQSEKLSTKAAVRLPGAICIEADDAISEQISQQVADINALKLRLEHLITVESGLPSEARFEFVHQHLRGLITLNAYRSVTLLHAPDSLRFGWANKNIIKNLTREAVVEQLERSLKANRAQAPWTREQWSEKVQQELEMILSLPADAKLKIKRPVKVQPIARVWRASDKKQV					VNKDKRLQILTRLRDDNPHPTTELYFSSPFELLIAVLLSAQATDVSVNKATAKMYPVANTPAAILALGVDGVKEFIKTIGLFNSKAENVIKTCRILIEQHGGEVPEDRAALEALPGVGRKTANVVLNTAFGWPTIAVDTHIFRVSNRTRFAPGKNVEEVEDKLVKVVPSAFKVDCHHWLILHGRYTCVARKPRCGSCLIEDLCEFDAKTEV-MNKVLLYCRPGFEKECAAEISAKATEREIFGFARVKDDSGYVLYECYQQEDAEKLIQTLPFSELIFARQMLVVGELLRDLPQEDRISPIVGMLTGVVEKGGDLRVEVPDTNQAKELTKFCRKLTVPLRASLRESKILLNYESPKRPVVHVFFIAPGTCYVGYSLPENNSPFYMGIPRLKFPSDAPSR…					MSKIVKVIGREIIDSRGNPTVEAEVHLEGGFVGLAAAPSGASTGSREALELRDGDKSRFLGKGVTKAVAAVNGPIAGAVTGKDAKDQANIDKIMIELDGTENKSNFGANAILAVSLAAAKAAAASKGLPLYAHIAELNGTPGKYSMPLPMMNIINGGEHADNNVDIQEFMIQPVGAKNVKEAIRMGSEVFHNLAKVLKSKGMSTAVGDEGGYAPNLGSNAEALAVIAEAVKAAGYELGKDITLAMDCAASEFY--KDGKYVLAGEGNKAFTSEEFTHFLEDLTKQYPIVSIEDGLDESDWAGFAYQTKVLGDKIQLVGDDLFVTNTKILKEGIDKGIANSILIKFNQIGSLTETLAAIKMAKDAGYTAVISHRSGETEDATIADLAVGTAAGQIKTGSM…					MTGFWITLIILLVAASALFLSAGWRQRQASSGDRDRLNTDFYQQRLRELERDEEEGVVAERPEMVRELQQTLLTDVPNE-RAARIH-HSSRWVLLPGLIVLILVSVGFYLKTGGLAQLAGWVSVQQEYPQLRARVMDPKAAPLTMEELARLQLGLRTSLQDDPQNLNDWTMLGRLGMVLNNATNASQAFERALQLAPNNLELQQDYAEVLTRSSDPQDNRQANVMLKDLLKREHSNVRTLSLLAFNAFEQQQYDQAIGAWQVMLKLLPAGDKRITMIERSIEQAKTDAGQQNSHLALTVSLAPQAEKMLPQGGVMYISVSDGVSPVPVAVKRLPLSHFPLSLTLDDSNAMMPDRLLSAQHQVQVRVRISRDGSANPQSGDWFGLSAITPWDSHQQLAVE…
>P_sp_A4					>P_sp_A4					>P_sp_A4					>P_sp_A4					>P_sp_A4					>P_sp_A4					>P_sp_A4					>P_sp_A4					>P_sp_A4					>P_sp_A4
MTKSELIERLASQQTHIPAKAIEDAVKEMLEHMATTLAEGERIEIRGFGSFSLHYRAPRTGRNPKTGDKVDLEGKYVPHFKPGKELRDRANIYDQSK-----MRATRLITILLLNLLGLVLFFSWYLPPDHGFWFALDKDIFYSFNSKMVTHPGFAMLVAITNFRGFDLVSLLAMGCLYLFFWRKQTPQGKRRMLAIGVTMLLTAVVLNQLGHLIPVHHASPTLFFKDVHRVSELTGIPAKDASGNSFPGDHGMMLIIFACFMWRYFGARAFIAGLVIVFVFALPRVMAGAHWFTDIAVGSMTVVLVGLSWCLLTPLTDKIIDWLYRKMPGKYKPAA---MPELPEVETSRRGIEPHLVGETILHAVVRNGRLRWPVSQEIHALSDQPVISVQRRAKYL…					MATQNIKKIVLAYSGGLDTSAIIPWLKENYGGCEVVAFVANIGQDPADLEGVEKKALQSGASECHVVDLREEFISDYIYPVLQTGALYEGTYLLGTSMARPIIAKAQVELALKVGADALCHGATGKGNDQVRFETTYTALAPQLKVVAPWREWDLRSREALLDYLKVRNIPTTASLEKIYSRDENAWHISTEGGVLESPANAPTKDCWVWTVDPLDAPDQPENVTVTVEKGRVVAVNGEKLSPFQCLEKLNVLGAKHGVGRIDIVENRLVGIKSRGCYETPGGTIMVNALRAVEQLVLDRDSFKWREQLGHEMAYVVYDGRWFAPLRKSIQAAAESLAEEVNGEVVLQLYKGQAIATQKTSANSLYSEEFATFGEDEVYDHRHAGGFIRLFSLSSRIRA…					MRLIQLSRESLHFPPPEMALREPNGLLAMGGDLSPARLLSAYNSGIFPWFSPGDPILWWSPDPRAVLLPENFHLSRSMKRFHQRSPYRVTMNHAFASVIEGCASQRDEGTWITFEVKRAWLRLFELGHAHSIEVWHQDALVGGMYGLSLGKMFCGESMFSRKENASKTALLVFCQHFLRHQGVLVDCQVINPHTASLGAQEIGRVDYLRYVQELASQSVGVECWQKQTLF----MATTSSGKIQVRNLNFHYGKFHALKSINLDIAKNQVTAFIGPSGCGKSTLLRTFNKMYSLYPEQRAEGEILLDGENILASSQDIALLRARVGMVFQKPTPFPMSIYDNIAFGVRLFEKLSRADMDERVQWALTKAALWNETKDKLHQSGYSLSGGQQQRLCIARG…					VELKATSLGKRLAQHPYNRVRLLSAGVEVSGDKHEYLIPFNQLLDITCKRGMVWGELEFQLLDEKVVRLHGTEWQETQRFHHYLQQAWNGWSTEMSDVCATVLQELQQRILALLEQDRWVKRSELNGLATTVQQQFAALPLPVARLARFENCRELWQFCQQWLNGGKTALRQRNQAWTQQILTRYQDFFAHVERSPLNPSQSEAVVNGEDAVLVLAGAGSGKTSVLVARAGWLLQRQLAKPEQILLLAFGRKAADEMNERVEGRLETKAIQARTFHALALHIIREGSSKQPNVSKLESDTQARRKLLIDEWRKQCSEKKAQANGWRQWLRDELQWELPEGAFWQDNALAQRLVTRFERWLSLIRMHGGAQAAMIAEVPEAIRESFSKRVKLMAPLVKAW…					MAMHLNDGTESDGEMHEINVTPFIDVMLVLLIIFMVAAPLATVDIRVNLPASTSTPQPRPDKPVYLSIKADNQLYVGNDQVTSDNLVNVLNAQTQGDKETTIFFQADKSVSYETLMKAMDELRGAGYLKIGLMGMESVQK----MSEQQPHSADAALELNNELKTRREKLSALREKGVAFPNDFRRDTTSDKLHASYDEKSNEELEALGVEVSVAGRMMTRRIMGKASFATLQDVGGQIQIYVSRDDLPEGVYNEQFKKWDLGDILGARGKLFKTKTGELSIHISELRLLTKALRPLPDKFHGLSDQETRYRQRYLDLIANDDSRNTFKVRSQIMAGIRQFMVNRDFMEVETPMMQVIPGGASARPFITHHNALDIDMYLRIAPELYLKRLVVGGFDRV…					MANDSRTHGWFQIFQRGQHYMKTWPNDKRLAPVFPENRVITATRFAVRFMPPLAVFAMAWQIALGGQLGPAVATALFACTLPMQGLWWLGKRSVTPLPPTLLSWFHEVRAKLEQAGQAIAPVEGKPTYQALADVLKRAFKQLDRTFLDDLMSILIDKNTKVICQGFTGGQGTFHSEQALAYGTQLVGGVTPGKGGTEHLGLPVFNTVREAVEATGATASVIYVPAPFCKDGILEAIDAGIKLIITITEGIPTLDMLTVKVKLDEAGVRMIGPNCPGVITPGECKIGIMPGHIHKPGRVGIVSRSGTLTYEAVKQTTDIGYGQSTCVGIGGDPIPGSNFIDILKLFQEDPQTEAIVMIGEIGGSAEEEAAAYIKANVTKPVVGYIAGVTAPKGKRMGHAG…					----LMRYDLVDDLRRSLNQLEQALSTLREDIEQQPLLIARVFSLPPIEKGQEHEAITQITVEQHLGLAARQKALEHYCRLFMQHQSEKLSTKAAVRLPGAICIECDEEKEASLMDQVSHINQLKQHIELMITQESGLPSEARFDFVHHHFPGLITLNAYRTIPLLSAPDSLRFGWANKNIIKNLQREEVVAMLEKSLKANRAQAPWTREQWAEKVQQELASVRALPANTRLKIKRPVKVQPIARVWRAEEKKQV					VNQNKRVEILSRLQQNNPHPTTELNFSSSFELLIAVLLSAQATDVSVNKATARLYPVANTPAAMLALGVDGVKEYIKTIGLFNSKAENVIKTCRILLEQHNGEVPEDRAALEALPGVGRKTANVVLNTAFGWPTIAVDTHIFRVCNRTNFAPGKNVEQVEDRLLKVVPKDFKVDCHHWLILHGRYTCVARKPRCGSCLIEDLCEFREKVDI-MNKVLLYCRPGFEKECAAEITAKATEREVFGFARVKENSGYVLFECYQQEDAEKLIKTLPFAELIFARQMVVVGELLRDLPPEDRITPIVGMLTGVVEKAGELRVEVPDTNEAKELTKFCRKLTVPLRASLRESKILLNYESPKRPVVHVFFIAPGTCYVGYSLTGNNSPFYMGIPRLKFPSDAPSR…					MSKIVKVIGREIIDSRGNPTVEAEVHLEGGFVGLAAAPSGASTGSREALELRDGDKSRFLGKGVTKAVAAVNGPIAQALVGKDAKDQANVDKVMIDLDGTENKSNFGANAILAVSLAAAKAAAASKGLPLYAHIAELNGTPGKYSMPLPMMNIINGGEHADNNVDIQEFMIQPVGAKNVKEAIRMGSEVFHHLAKVLKAKGLNTAVGDEGGYAPNLGSNAEALAVIAEAVKAAGYELGKDITLAMDCAASEFY--KDGKYVLAGEGNKAFTSEEFTHFLEELTKQYPIVSIEDGLDESDWAGFAYQTKVLGDKIQLVGDDLFVTNTKILKEGIEKGIANSILIKFNQIGSLTETLAAIKMAKDAGYTAVISHRSGETEDATIADLAVGTAAGQIKTGSM…					MSAFWITLLLLLVAASTLFLAAGWRQRNATDGDRDRLNKNFYQQRLIELEQDEAQGKVSERPEMVQELQQTLLTDIPSS-AAMQAH-NSSRWVLLPGVLILVLVSCGMYLKTGGLAQVSSWFQVKAEYPQLRAQLMDPHGRPLTMDELGRLELGLRSQLQEQPNDLNGWAMLGRLGMVLNNATTARLAFQHALQLAPENLELQQDYAEVLARSSDPQDNRQAELLLNDLRKQQPQNLRVLGLFAFNAFQLQKYDSAISTWQTMLPLLPAGDQRITMVERSIEQAKTNAGQQNSGLAVKVALAAQAEKMLPPGGVMYISVTDGVSPVPVAVKRLPLSHFPLSLTLDDSNAMMPSRLLSAQHQVQVRVRISRDGTANPQPGDWFGLSAVTPWDGHQSLTVE…
>P_allii					>P_allii					>P_allii					>P_allii					>P_allii					>P_allii					>P_allii					>P_allii					>P_allii					>P_allii
MTKSELIERLAGQHTHIPAKVVEDAVKEMLEHMATTLAQGERIEIRGFGSFSLHYRAPRTGRNPKTGDKVDLEGKYVPHFKPGKELRDRANIYG--------MHATRLVTILLLNALGMMLFFSWYLPPGHGFWFDIDKGIFFAFNNEMVNYPGFALLVAITNFRGFDAVSLLVMGLLYLWLWQRETPTGRRRMLAIGITMLLTAVILNQAGHLLPVKHASPTLFFEGVHRVSELTGIPAKDASKDSFPGDHGMMLMIFAAFMWRYFGFRTFLVSVVIVVVFSLPRIMAGAHWFTDIAVGSLSVTLVGLSWWLLTPASDYLVNWFYHKLPGKNKPQQ---MPELPEVETSRRGIEPHLVGQTILHAVVRNARLRWPVSQEILALSDQPVLSVQRRAKYL…					MQTQNIKKIVLAYSGGLDTSAIIPWLKENYGGCEVVAFVADIGQERSDLEGVEKKALQSGASECHVVDLREEFISEYVYPVLQTGALYEGTYLLGTSMARPIIAKAQVELALKVGADALCHGATGKGNDQVRFETTYTALAPQLKVVAPWREWNLRSREALLDYLKERNIPTTASLEKIYSRDENAWHISTEGGVLESPSNAPNKDCWVWTVDPLEAPDQPEDVTVTVEKGRVVAVNGEKLSPFQCLEKLNVLGAKHGVGRIDIVENRLVGIKSRGCYETPGGTIMVNALRAVEQLVLDRDSFKWREQLGHEMSYVVYDGRWFAPLRKSIQAAAESLAEEVNGEVVLQLYKGQATATQKRSANSLYSEEFATFGEDEVYDHRHAGGFIRLFSLSSRIRA…					MRLVQLSRESLLFPPPEMALREPNGLLAMGGDLSPARLLSAYQQGIFPWFSPGDPILWWSPDPRAVLIPEHFHLSRSMKRFHQQSPYRVTMNEAFADVVEGCAMGREEGTWITFEVKRAWLKLYELGHAHSIEVWRGQQLAGGMYGLALGQIFCGESMFSLQTNASKTALWVFCQHFIKHKGHLVDCQILNPHTASLGAVEIPREAYLESVKNLSSQPVDSGCWLNQTLF--MSTATASAGKIEVRNLNFYYGKFHALKNINLDIAKNQVTAFIGPSGCGKSTLLRTFNKMYSLYPDQRAEGDILLDGDNILASHQDIALLRARVGMVFQKPTPFPMSIYDNIAFGVRLFEKLSRADMDERVQWALTKAALWNETKDKLHQSGYSLSGGQQQRLCIARG…					-------MGKRLAQHPYNRVRLLAAGVEVSGDKHEYLLPFNQLSDITCKRGMVWGELEFLLADGKVVRLHGTEWQETQRFYHYLMQSWQAWSHEMSEVCAAVLQDLREEIQGFSEQDRWLKRSELQAVKNQILKQFDALPLPLSRIESFDSCRENWAFCQHWLQQGDAAIGQRNRDWTAAMLTRYQDFFATVESTPLNTSQAEAVVNGEDAVLVLAGAGSGKTSVLVARAGWLLARRLASADQILLLAFGRHAAE					MAMRLNDHSETEGEMHEINVTPFIDVMLVLLIIFMVAAPLATVDVRVNLPASTSAPQPRPEKPVYLSIKADKQLYVGNEAVNNASLINVLTQQTQGKKDTTIFFQADKSVDYETLMSVMDELRTAGYLKIGLMGMETVKK----MSEQQPQSADVALELNNELKTRREKLSVLRENGVAFPNDFRRDITSDRLHASYDEKSNEELEDLGIEVSVAGRMMTRRIMGKASFITLQDVGGRIQLYVARDDLAEGIYNEQFKKWDLGDILGARGKLFKTKTGELSIHCSELRLLTKALRPLPDKFHGLADQETRYRQRYLDLIANDDSRNTFKIRSQIMAGIRQFMVGRDFMEVETPMMQVIPGGASARPFITHHNALDIDMYLRIAPELYLKRLVVGGFDRV…					-MANESHTGWFRMFQRGQHYMKTWPNDKRLAPVFPENRVSSATRFSIRFMPPLAVFTLTWQIAMGGQLGPAVATALFACSLPMQGLWWLGKRSVTPLPPTLLRWFHEVRTKLEAAGQAIAPVEGKPTYQALADLLKRAFKQLDRTFLDDLMSILIDKNTKVICQGFTGGQGTFHSEQALAYGTQLVGGVTPGKGGTTHLGLPVFNTVREAVEATGATATVIYVPAPFCKDGILEAIDAGIKLIITITEGIPTLDM					MEKTTVRYDLVTDMQQCVKDLEQALGELRQQTESLPLLIARVFRLPPVEKGHEHDPISQITVEQQLGIAAREMALNHYCRLFMQHQSEKLSTKAAVRLPGALCIECNEQEERELTGRIAGINQSKARLEQLITVESGLPSEARFEFVHQHLRGLITLNAYRTLTAITAPESLRFGWANKQVIKNVKREEIVAQLEKSLKAGRAQAPWTREQWAEKVQQELADVRALPASARLKIKRPVKVQPIARVWRAEEKKQTQLACPSPILVLCRDRSQVPQLGELLNYDADNITHRYKPAAEPLYLLIPRLHLWVDCPV---MSLNYLDFEQPIAELEAKIDSLTSIGRQDDKH-VNLDEEVKRLREKSVELTRKIFADLGAWQIAQLARHPLRPYTFDYVRNAF…					VNQTKRTEILSRLQQANPHPTTELQFSSPFELLIAVLLSAQATDVSVNKATAKLYPVANTPAAMLALGVDGVKEYIKTIGLFNSKAENVIKTCRILLEQHGGNVPEDRAALEALPGVGRKTANVVLNTAFGWPTIAVDTHIFRVCNRTNFAPGKNVEQVEEKLLKVVPKAFKVDCHHWLILHGRYTCVARKPRCGSCLIEDLCEYPDKVE--MNKVLLYCRSGFEKECAAEISAKAAEHNVYGFPRVKEDAGYVLFECYQQPDAERLIRELPFDTLIFARQMLVVGELLRDLPQEDRISPIVGMLSGVVEKGGELRVEVPDTNQAKELTKFCRKFTVPLRASLRESNILLNYESPKRPVVHVFFIAPGTCYVGYSLPENNSPFYMGIPRLKFPSDAPSR…					MAKIVKVIGREIIDSRGNPTVEAEVHLEGGFVGLAAAPSGASTGSREALELRDGDKSRFLGKGVTKAVAAVNGPIAEAVKGKDAKDQANIDKIMIDLDGTENKSNFGANAILAVSLAAAKAAAASKGQALYEHIAELNGTPGKYSMPLPMMNIINGGEHADNNVDIQEFMIQPVGASNVKEAIRMGSEVFHNLAKVLKSKGMSTAVGDEGGYAPNLGSNAEALAVIAEAVKAAGYELGKDITLAMDCAASEFY--KDGKYVLAGEGGKAFTSEEFTHFLEDLTKQYPIVSIEDGLDESDWDGFAYQTKVLGDKIQLVGDDLFVTNTKILKEGIDKGIANSILIKFNQIGSLTETLAAIKMAKDAGYTAVISHRSGETEDATIADLAVGTAAGQIKTGSM…					-------------------------MRAT------ALTHIFYQQRLAELTQDEEQGVIADRAVMERELQQTLLSDIPPA-SETHAHSSSRRWVLLPGLIVLIVVSVASYLKTGGLTQLSSWMQIQEDYPALRAQVMDPHARPLTLEQLSRLQLGLRSQLQSEPDNPGGWAMLGRLGMVLNDATTARQAFERALQLAPNNMALKQDYAEVLTRSGDPQDNRQAGLLLKDLLKQHPQNIRTLSLLAYNAFEQQQYSQ
>P_septica					>P_septica					>P_septica					>P_septica					>P_septica					>P_septica					>P_septica					>P_septica					>P_septica					>P_septica
MTKSELIERLAGQQTHIPAKVVEDAVKEMLEHMATTLAQGERIEIRGFGSFSLHYRAPRTGRNPKTGDKVELEGKYVPHFKPGKELRDRANIYG-----------------VLLNALGVVLFLSWYLPPDHGFWAGIDKGIFFSFNNQMVDHPGFALLVAIANFRGFDLVSLLAMGALYLVYWRRETPPGRRRMLAIGITMLLSAVILNQLGHLLPVQHKSPTLFFENAHRVSELTGIPAKDASSNSFPGDHGMMLMIFACFMWRYFGFRAFLAGAAIVVIFALPRVMAGAHWFTDIAVGSLSVLLVGLSWVLLTPLSDAIVSFFYRKLPGKYKPE----MPELPEVETSRRGIEPHLVGEKILHAVVRNGRLRWPVSQEIHALSDQPVLSVQRRAKYL…					MSTQNIKKIVLAYSGGLDTSAIIPWLKENYGGCEVVAFVADIGQERSDLEGVEKKALQSGASECHVVDLREEFISDYVYPVLQTGALYEGTYLLGTSMARPIIAKAQVELALKVGADALCHGATGKGNDQVRFETTYTALAPQLKVVAPWREWNLRSREALLDYLKERNIPTTASLEKIYSRDENAWHISTEGGVLESPANAPNKDCWVWTVDPLEAPDQPENVTVTVEKGRVVAVNGERLSPFQCLEALNAIGAKHGVGRIDIVENRLVGIKSRGCYETPGGTIMVNALRAVEQLVLDRDSFKWREQLGHEMSYVVYDGRWFAPLRKSIQAAAESLAEEVNGEVVLQLYKGQATAIQKRSSNSLYSEEFATFGEDEVYDHRHAGGFIRLFSLSSRIRA…					-----------------MALREPNGLLAMGGDLSPARLLSAYQRGIFPWFSPGDPILWWSPDPRAVLVPESFHLSRSMARFHRRSPYRVTMNHAFFEVVEGCAAGRQEGTWITFEVKRAWQRLYELGHAHSVEVWQDQQLVGGMYGLALGQIFCGESMFSRSENASKTALWVFCQHFMKHQGRLVDCQVLNPHTASLGAHEIPRVDYLQYVQTLAWQPVSAGCWRTQTLF--MSIATSNSGKIQVRNLNFYYGKF					MELKATSMGKRLAQHPYNRVRLLAAGVEVSGERHEYLIPFNELLNISCKRGMVWGELEFLLPDDKVVRLHGTEWQETQRFYHYLLQAWQAWSAEMSAICAGVLGELRQEIERFGEQDRWIKRSELQALRGTIEKQFAALPLPLARLEEFSDCREPYLLCQRWLEQGDAALRRRNRDWTARMLSAHHDFFATVESSPLNVSQSEAVVNGEDAVLVLAGAGSGKTSVLVARAGWLLRRKLAAPEQILLLAFGRQAAEEMNDRIRSRLGVADIQARTFHALALHIIREGSNKQPVISKLESDIAARHALLIDTWRQQCDEKKAQANGWRQWLRDELEWELPEGHFWQDDRLAKLLASRLERWLGLMRMHGGAQAAMIAHAPEEVRELFGKRVKLMAPLLKAW…					MAMRLNDDLETDGEMHEINVTPFIDVMLVLLIIFMVAAPLATVDVRVNLPASTSAPQPRPEKPVYLSIKADKQFYIGNEQVTPETLVAVLNSQTEGNKETTIFFQADKSVDYETLMSAMDKLRGAGYLKIGLMGMETAAK----MSEQQPQSADAALELNNELKTRREKLSALRENDVAFPNDFRRDTTSDALHAQYDEKSNEELEDLGVEVSVAGRMMTRRIMGKASFVTLQDVGGRIQLYVARDDLAEGLYNEQFKKWDLGDILGARGKLFKTKTGELSIHCHELRLLTKALRPLPDKFHGLADQETRYRQRYLDLIANDESRNTFKIRSQIMAGIRQFMVGRDFMEVETPMMQVIPGGASARPFITHHNALDIDMYLRIAPELYLKRLVVGGFDRV…					MANDSGNTGWFRIFQNGQHYMKTWPNDKRLAPIFPENRVSSVTRFAIRFMPPLAVFTLSWQIALGGQLGPAVATALFACSLPMQGLWWLGKRSVTPLPPTLLHWFHEVRARLEEAGQAIAPVEGKPTYQALADLLKRAFKQLDRTFLDDLMSILIDKNTKVICQGFTGGQGTFHSEQALAYGTQLVGGVTPGKGGTTHLGLPVFNTVREAVEATGATATVIYVPAPFCKDGILEAIDAGIKLIITITEGIPTLDMLTIKVKLDEAGVRMIGPNCPGVITPGECKIGIMPGHIHQPGRVGIVSRSGTLTYEAVKQTTDIGYGQSTCVGIGGDPIPGSNFIDILKMFQDDPQTEAIVMIGEIGGSAEEEAAAFIKEHVTKPVVGYIAGVTAPKGKRMGHAG…					-----MRYDLISDLHDCANRLEASLGELREMIMAQPLLIARVFSLPPIEKGHEHDAVTEIAVEQHLGEAAREMALAHFCRLFMQHQSEKLSTKAAVRLPGALCIEADGERETALIDQIAQVNQYKARLEQIITVESGLPSEARFEFVHQHLRGLITLNAYRTITLLQAPDSLRFGWANKHVIKNVKREEIIAQLEKSLSANRAQAPWTREQWAEKVQDELESVRALPATARLKIKRPVKVQPIARVWRADEKKQT					VNQAKRREILTRLRDNNPHPTTELNFTSPFELLIAVLLSAQATDVSVNKATAKLYPVANTPAAMLSLGVEGVKEHIKTIGLYNSKAENVIKTCRILLEQHGGEVPEDRAALEALPGVGRKTANVVLNTAFGWPTIAVDTHIFRVSNRTRFAPGKNVEEVEAKLLKVVPAEFKVDCHHWLILHGRYTCVARKPRCGACLIEDLCEFPDKTEI-MNKVLLYCRPGFEKECAAEIAACAAEREIYGFPRVKENSGYVLFECYQHEDADRLARDLPFDTLIFARQMLVVGELLKDLPPDDRIAPIVGMLTGVVEKGGELRVEVPDTNEAKELTKFCRKFTVPLRASLREAGILLNYESPKRPVVHVFFIAPGACYVGYSVVGNNSPFYMGIPRLKFPADAPSR…					MAKIVKVIGREIIDSRGNPTVEAEVHLEGGFVGLAAAPSGASTGSREALELRDGDKSRFLGKGVTKAVAAVNGPIADAVKGKDAKDQANIDKIMIDLDGTENKSNFGANAILAVSLAAAKAAAASKGQPLYEHIAELNGTPGKFSMPLPMMNIINGGEHADNNVDIQEFMIQPVGASTVKEAIRMGSEVFHHLAKVLNSKGLNTAVGDEGGYAPNLGSNAEALAVIAEAVKAAGYELGKDITLAMDCAASEFY--KDGKYVLAGEGNKAFTSEEFTHFLEDLTKQYPIVSIEDGLDESDWNGFAYQTKVLGDKIQLVGDDLFVTNTKILKEGIEKGIANSILIKFNQIGSLTETLAAIKMAKDAGYTAVISHRSGETEDATIADLAVGTAAGQIKTGSM…					MSALWISIIILLAAASALFLGAGWRQRQASEADRDRLNTDFYHQRLRELEEDEAQGVIGERATMVSELQQTLLTDIPPQ-NAAPSR-ASSRLALLPGVVALIAVSLGFYLKSGGLTQVAGWMQVQQDYPALRARVMDPQAKPLTMEELARLQLGLRTALQAQPDNLNDWTMLGRLGMVLNNAAIASQAFEHALQLAPNNLALKQDYAEVLTRSSDPQDNRQAGLMLRDMLKEEGGNLRTLGLLAFNAYEQQQYDEAISSWQAMLKQIPADDRRRAMIERSIEQAKTDAGQQNTQLALTVTLTPEAEKMLPPGGVMYISVSDGVSPVPVAVKRLPLSHFPLSLTLDDSNAMMPERLLSAQHQVQVRVRISRDGNASPQSGDWFGLSAVTPWDGHQHMAVE…
>P_sp_At-9b					>P_sp_At-9b					>P_sp_At-9b					>P_sp_At-9b					>P_sp_At-9b					>P_sp_At-9b					>P_sp_At-9b					>P_sp_At-9b					>P_sp_At-9b					>P_sp_At-9b
MTKSELIERLAGQQTHIPAKVVEDAVKEMLEHMATTLAQGERIEIRGFGSFSLHYRAPRTGRNPKTGDKVDLEGKYVPHFKPGKELRDRANIYG--------MRASRLFTILLLNVLGVVIFFSWYLPPDHGFWFGLDKAIFFGFNDQMVVHHGFAILVAITNFRGFDLVSLLAMGLLYLWFWRRETPPGRRRMLAIGITMLLTAVVLNQLGHLLPVQHVSPTLFFENVHRVSELTGIPAKDASSNSFPGDHGMMLIIFACFMWRYFGFRPFLLGLVIVVVFGLPRVMAGAHWFTDIAVGSLSVVLVGLSWWLLTPASDKLVNWLYRTLPGKYKPQA---MPELPEVETSRRGIEPHMVGETILHAVVRNSRLRWPVSSEIHALSDQPVLSVQRRAKYL…					MQTQGIKKIVLAYSGGLDTSAIIPWLKENYGGCEVVAFVANIGQDPADLEGVEKKALQSGASECHVVDLREEFISDYVYPVLQTGALYEGTYLLGTSMARPIIAKAQVELALKVGADALCHGATGKGNDQVRFETTYTALAPQLKVVAPWREWNLRSREALLDYLKERNIPTTASLEKIYSRDENAWHISTEGGVLESPWNAPNKDCWVWTVDPLEAPDQPENVTVTVEKGRVVGVNGEKLSPFACLEKLNTLGAKHGVGRIDIVENRLVGIKSRGCYETPGGTIMVNALRAVEQLVLDRDSFKWREQLGQEMSYVVYDGRWFAPLRQSIQAAAESLAELVNGEVVLQLYKGHATAIQKKSVNSLYSEEFATFGEDEVYDHRHAGGFIRLFSLSSRIRA…					MRLVQLSRDSLHFPPPEMALREPNGLLAMGGDLSPARLMNAYQRGIFPWFSPGDPILWWSPDPRAVLLPESFHLSRSMARFHRQSPYRVTMNQAFAQVLEGCASNRQEGTWITFEVKRAWLRLYELGHAHSVEVWHEQRLVGGLYGLALGQIFCGESMFSRQENASKTALWVFSQHFLQHHGRLIDCQVLNPHTASLGAVDIPRGDYLQYVQTLAWQPVLAGCWQTQTLF--MSMATSSAGKIQVRNLNFHYGKFHALKNINLDIAKNQVTAFIGPSGCGKSTLLRTFNKMYSLYPEQRAEGEILLDGDNILASNQDIALLRARVGMVFQKPTPFPMSIYDNIAFGVRLFEKLSRADMDERVQWALSKAALWNETKDKLHQSGYSLSGGQQQRLCIARG…					MELKATSMGKRLAQHPYNRVRLLEAGVEVSGDRHEYLIPFNQLLDIACKRGLVWGELEFLLPEDKVVRLHGTEWQETQRFFHYLQQAWQQWSQEMSEVCVEVLTGLQQEIFAFTGQDRWLKRSELQAVKENITRQFSALPLPTSRLEKFENCRELWQFCQQWLGQGETAIRQRNREWTAKILQQYQTFFSTVETTPLNPSQCEAVVNGEDALLVLAGAGSGKTSVLVARAGWLLQRKLAQPEQILLLAFGRQAAEEMNDRIQSRLGENAIQARTFHALALHIIREGSNKQPAISKLESDSKARRQLLIESWREQCNSKKAQASGWRQWLQEELEWEIAEGPFWQDDKLAQRLASRLERWLGLMRMHGGAQAAMIADVPEEQREQFSKRIKLMAPILKAW…					MAMRLNDDLESDGEMHEINVTPFIDVMLVLLIIFMVAAPLATVDVRVNLPASTSAPQPRPEKPVYLSIKEDNQVYIGNDQVTKETLVNALTAQTEGNKDTTIFFQADKSVSYETLMSVMDQLREAGYLKIGLMGMESVKK----MSEQQPQSADAALELNNELKTRREKLSALRETGVAFPNDFRRDTTSDQLHASYDEKSNEELEDLGIEVSVAGRMMTRRIMGKASFITLQDVGGRIQLYVARDDLAEGVYNEQFKKWDLGDILGARGKLFKTKTGELSIHCSELRLLTKALRPLPDKFHGLADQETRYRQRYLDLIANDESRHTFQVRSKIMAGIRQFMVGRDFMEVETPMMQVIPGGASARPFITHHNALDIDMYLRIAPELYLKRLVVGGFDRV…					MANDTDNPGWFGLFQRGQHYMKTWPADKRLAPVFPENRVATATRFSIRFMPPLAIFTLTWQIAMGGQLGPAVATALFACSLPMQGLWWLGKRSVTPLPPTLLQWFHEVRAKLEEAGQAIAPVEGKPTYQALADVLKRAFKQLDRTFLDDLMSILIDKNTKVICQGFTGGQGTFHSEQALAYGTQLVGGVTPGKGGTTHLGLPVFNTVREAVEATGATATVIYVPAPFCKDGILEAIDAGIKLIITITEGIPTLDMLTVKVKLDEAGVRMIGPNCPGVITPGECKIGIMPGHIHLPGRVGIVSRSGTLTYEAVKQTTDIGYGQSTCVGIGGDPIPGSNFIDILKMFQEDPQTEAIVMIGEIGGSAEEEAAAYIKAHVTKPVVGYIAGVTAPKGKRMGHAG…					----MARYDLIADLHACVNTLEEHLGALRQQVEQQPLLIARVFGLPDIEKGHEHDEISRIKVTQHLGAEAREMALTHYCRLFMQHQSEKLSTKAAVRLPGAICIEADQLASEMITRQVAEINALKQRLEQLITVESGLPSEARFEFVHQHLRGLITLNAYRNVTLLDSPDSLRFGWANKNIIKNVKREEIIEQLERSLKANRAQAPWSREQWAEKVQQELEAVRDLPISARLKIKRPVKVQPVARVWRAEEKKQT					VNQDKRVQILTRLRDENPHPTTELNFSSPFELLIAVLLSAQATDVSVNKATAKLYPVANTPASLLALGVDGVKEYIKTIGLFNSKAENVIKTCRILLEQHGSEVPEDRAALEALPGVGRKTANVVLNTAFGWPTIAVDTHIFRVSNRTRFAPGKNVEEVEEKLLKVVPKAFKVDCHHWLILHGRYTCVARKPRCGSCLIEDLCEFDAKTE--MNKVLLYCRPGFEKECAAEISAKAAEREIYGFPRVKDDAGYVLFECYQQEDAEKLISQLPFAELIFARQMVVVGELLRDLPPEDRISPIVGMLTGVVEKGGELRVEVPDTNEAKELTKFCRKFTVPLRASLRESKILLNYESPKRPVVHVFFIAPGTCYVGYSLPQNNSPFYMGIPRLKFPSDAPSR…					MSKIVKVIGREIIDSRGNPTVEAEVHLEGGFVGLAAAPSGASTGSREALELRDGDKSRFLGKGVTKAVAAVNGPIADAVKGKDAKDQANIDKIMIELDGTENKSNFGANAILAVSLAAAKAAAASKGQPLYEHIAELNGTPGKYSMPLPMMNIINGGEHADNNVDIQEFMIQPVGAKTVKEAIRMGSEVFHHLAKVLKSKGMNTAVGDEGGYAPNLGSNAEALAVIAEAVKAAGYELGKDITLAMDCAASEFY--KDGKYVLAGEGGKAFTSEEFTHFLEDLTKQYPIVSIEDGLDESDWAGFAYQTKVLGDKIQLVGDDLFVTNTKILKEGIEKGIANSILIKFNQIGSLTETLAAIKMAKDAGYTAVISHRSGETEDATIADLAVGTAAGQIKTGSM…					MSGFWITLIVLLAAATALFLSAGWRQRVASNGDRDRLNTDFYQQRLRELERDEDEGVVAERPEMVRELQQTLLTDVPQQ-DQARSH-QSSRWILLPGVGLLVVVSLGMYLKTGGLAQLAGWTSVQQEYPALRARVMDPQAKPLTMEELARLQLGLRTSLQSDPQNLNDWTMLGRLGMVLNNATDASQAFQRALQLAPNNLELQQDYAEVLTRSSDPQDNRQASMLLRDLLKRDHSNVRTLSLLAFNAFEQQQYDEAIGAWQMMLKLLPAGDQRIAMIERSIEQAKTDAGQQNTHLALTVSLTPQAEKMLPQGGVLYISVTDGVSPVPVAVKRLPLSHFPLSLTLDDSNAMMPDRLLSAQHQVQVRVRVSRDGSANPQSGDWFGLSAATPWDGHQQLAVE…
>P_s_indologenes					>P_s_indologenes					>P_s_indologenes					>P_s_indologenes					>P_s_indologenes					>P_s_indologenes					>P_s_indologenes					>P_s_indologenes					>P_s_indologenes					>P_s_indologenes
MTKSELIERLAGQHTHIPAKVVEDAVKEMLEHMATTLAQGERIEIRGFGSFSLHYRAPRTGRNPKTGDKVDLEGKYVPHFKPGKELRDRANIYG--------MHATRLVTILLLNALGMMLFFSWYLPPHHGFWFEIDKGIFFAFNNEMVAHPAFALLVAITNFRGFDAVSLLAMGLLYLWLWYRETPTGRRRMLAIGITMLVTAVVLNQAGHLLPVKHASPTLFFDGVHRVSELTGIPAKDASKDSFPGDHGMMLMIFAAFMWRYFGFRPFLVGVVIVVLFALPRVMAGAHWFTDITVGSLSVVLVGLSWWLLTPASDYLVNWFYHKLPGKNKPQG---MPELPEVETSRRGIEPHLVGQTILHAVVRNARLRWPVSNEILALSDQPVLSVQRRAKYL…					MQTQNIKKIVLAYSGGLDTSAIIPWLKENYGGCEVVAFVADIGQERSDLEGVEKKALQSGASECHVVDLREEFISDYVYPVLQTGALYEGTYLLGTSMARPIIAKAQVELALKVGADALCHGATGKGNDQVRFETTYTALAPQLKVVAPWREWDLRSREALLDYLKARNIPTTASLEKIYSRDENAWHISTEGGVLESPSNAPNKDCWVWTVDPLEAPDQPEDVTVTVEKGRVVAVNGERLSPFQCLEKLNVLGAKHGVGRIDIVENRLVGIKSRGCYETPGGTIMVNALRAVEQLVLDRDSFKWREQLGHEMSYVVYDGRWFAPLRKSIQAAAESLAEEVNGEVVLQLYKGQATATQKRSANSLYSEEFATFGEDEVYDHRHAGGFIRLFSLSSRIRA…					MRLVQLSQESLRFPPPETALREPNGLLAMGGDLSPARLLSAYQQGIFPWFSPGDPILWWSPDPRAVLFPTQFHLSRSMKRFHQQSPYRVTMNEAFGDVVDGCALGREEGTWITFEVKRAWQKLYELGHAHSIEVWRDQTLAGGMYGLALGQIFCGESMFSLQPNASKTALLVFCQHFIKHGGQLVDCQILNPHTASLGAVEIARDHYLEQVKNLASLAVDSGCWRNQTLF--MSTATASAGKIQVRNLNFYYGKFHALKNINLDIAKNQVTAFIGPSGCGKSTLLRTFNKMYSLYPEQRAEGDILLDGDNILASNQDIALLRARVGMVFQKPTPFPMSIYDNIAFGVRLFEKLSRADMDERVQWALTKAALWTETKDKLHQSGYSLSGGQQQRLCIARG…					VELKATSMGKRLAQHPYHRVRLLSAGVEVSGDKHEYLIPFNQLSDISCKRGMVWGELEFLLADNKVVRLHGTEWQETQRFFHYLMQSWQSWSQEMSEVCAAVLQALRDDIQGFSEQERWLKRSELQAIKDKIRKQFDALPLPLSRIEQFDSCRENWAFCQYWLQQGETAMTQRNRDWTAAMLTRYRDFFATVESTPLNESQAEAVVNGEDAVLVLAGAGSGKTSVLVARAGWLLQRRLAAADQILLLAFGRHAAEEMNDRIQRRLGAGDIQARTFHALALHIIREGSHKQPVISKLESDADARRTWLIDHWRQQCNEKKAQANGWRQWLRDELEWEVSEGPFWQDDRLAQRLASRLERWLGLMRMHGGAQAAMIEDVPDALRDVFSKRIKLMAPLLKAW…					MAMRFNDSSETDGEMHEINVTPFIDVMLVLLIIFMVAAPLATVDVRVNLPASTSAPQPRPEKPVYLSIKADKQLYVGNDQVNKDALINVLTQQTQGNKDTTIFFQADKSVDYETLMSVMDELRTAGYLKIGLMGMETVKK----MSEQQPQSADVALELNNELKTRREKLSVLRENGVAFPNDFRRDTTSDRLHASYDEKSNEELEDLGIEVSVAGRMMTRRIMGKASFITLQDVGGRIQLYVARDDLPEGIYNEQFKKWDLGDILGARGKLFKTKTGELSVHCSELRLLTKALRPLPDKFHGLADQETRYRQRYLDLIANDESRNTFKIRSQIMAGIRQFMVARDFMEVETPMMQVIPGGASARPFITHHNALDIDMYLRIAPELYLKRLVVGGFDRV…					-MANQSNTGWFRMFQRGQHYMKTWPNDKRLAPVFPENRVSTATRFAIRFMPPLAVFTLTWQIAMGGQLGPAVATALFACSLPMQGLWWLGKRSVTPLPPTLLRWFHDVRTKLEAAGQAIAPVEGTPTYQALADLLKRAFKQLDRTFLDDLMSILIDKNTKVICQGFTGGQGTFHSEQALAYGTQLVGGVTPGKGGTTHLGLPVFNTVREAVEATGATATVIYVPAPFCKDGILEAIDAGIKLIITITEGIPTLDM					-------------MQQCVKDLEEALGALRQQIEAQPLLIARVFSLPPIEKGHEHDAITQIAVEQHLGTEARERALNHYCRLFMQHQSEKLSTKAAVRLPGALCIECSEQDTQQLTAFINSINQLKARLEHMITVESGLPSEARFEFVHQHLRGLITLNAYRTITALPAPESVRFGWANKQVIKNVKRDEIIAQLEKSLKAGRAQAPWTREQWAEKVQQELADVRALPASARLKIKRPVKVQPVARIWRAEEKKQT					VNQTKRIEILSRLQQANPHPTTELQFTSPFELLIAVLLSAQATDVSVNKATAKLYPVANTPAAMLALGVDGVKEYIKTIGLFNSKAENVIKTCRILLDQHGGQVPEDRAALEALPGVGRKTANVVLNTAFGWPTIAVDTHIFRVCNRTNFAPGKNVEQVEEKLLKVVPKAFKVDCHHWLILHGRYTCVARKPRCGSCLIEDLCEYPDKVE--MNKVLLYCRAGFEKECAAEISAKAAERNVYGFPRVKEDAGYVLFECYQQPDAERLIRELPFEQLIFARQMLVVGELLRDLPQDDRISPIVGMLSGVVEKGGELRVEVPDTNEAKELTRFCRKFTVPLRASLRESKILLSYESPKRPVVHVFFIAPGTCYVGYSLPENSSPFYMGIPRLKFPSDAPSR…					MAKIVKVIGREIIDSRGNPTVEAEVHLEGGFVGLAAAPSGASTGSREALELRDGDKSRFLGKGVTKAVAAVNGPIAEAVKGKDAKDQANIDKIMIDLDGTENKSNFGANAILAVSLAAAKAAAASKGQALYEHIAELNGTPGKYSMPLPMMNIINGGEHADNNVDIQEFMIQPVGASSVKEAIRMGSEVFHNLAKVLKSKGMSTAVGDEGGYAPNLGSNAEALAVIAEAVKAAGYELGKDITLAMDCAASEFY--KDGKYVLAGEGGKAFTSEEFTHFLEDLTKQYPIVSIEDGLDESDWDGFAYQTKVLGDKIQLVGDDLFVTNTKILKEGIEKGIANSILIKFNQIGSLTETLAAIKMAKDAGYTAVISHRSGETEDATIADLAVGTAAGQIKTGSM…					MAAFLIAILVLLFAACVLFLAAGWRPRASHIVTRDSLNKDFYHQRLAELTQDEDQGVIAERDVMARELQQSLLSDIPPA-PDAQSR-SSRRWVLLPGIIVLLVVPLVCYLNTGGFVPFSGWLQVQKAYPALRAQVLDPHAKPLTPEQLSRLQLGLRSHLQTEPDNLSDWAMLGRLGMVLNNATTARQAFEHALQLAPNNQVLKQDYAEVLARSGDPQENRQAELVLQDLRKQDPHNARTLSLLAYAAFEQQHYAQAIAAWQTLLNALPADDPRRDNIARSIEQARTDAGQQASQLTVDVTLSPQAENMLPPGGVMYISVTDGMSPVPVAVKRLAAGHFPVSLTLDDSNAMMQGRRLSAQKQIQVRVRISRNGRANPEPGDWFGVSAVVPWDGHQHVTVE…
>T_morbirosei					>T_morbirosei					>T_morbirosei					>T_morbirosei					>T_morbirosei					>T_morbirosei					>T_morbirosei					>T_morbirosei					>T_morbirosei					>T_morbirosei
MTKSELIERLASQQTHIPAKAVEDAVKEMLEHMASTLAQGERIEIRGFGSFSLHYRAPRTGRNPKTGDKVELEGKYVPHFKPGKELRDRANISE--------MRPSRLITILLLNALGFALFFSWFVPQHHGFWFTIDKSIFFDFNNRMVTHPWFAKFVAITNFRGFDLVSLIAMGLLYYSYWKKNTIPGRHRMLAIGVTMLLSAVVLNQLGHQIPVVHSSPTLFFKNVHRVGELTGIPTKDASSDSFPGDHGMMLMIFACFMWRYFGGRAFIKAAIIFFVFALPRVMAGAHWFTDIAVGSLSVVLVGMSWWLLTSGSDRLVNFLDRKLPGRRQ------MPELPEVETSRRGIEPHLVGATVLHAVVRNARLRWPVSPEILSLSDQPVLSVQRRAKYL…					----------LAYSGGLDTSAIIPWLKENYG-CEVVAFVANVGQDPEDLVGVESKALQSGASECHIVDLREEFISEYVYPVLQTGALYEGTYLLGTSMARPIIAKAQVELALKVGADALCHGATGKGNDQVRFESTYAALAPQLKVVAPWREWDLRSREALLAYLKERNIPTTATLEKIYSRDENAWHISTEGGVLESPWNAPNKDCWVWTVDPLEAPDQPEEVSVTVEKGRVVAVNGEALSPFECLNKLNTLGA					LYLPQLADHSVSFPDPYTALREPNGLLAFGGDLSVERMISAYRQGIFPWFSEQDPLLWWSPDPRAVLPPGEFHVSRSMARFHRTSHYRVTVDQDFSSVIHGCATQRTDGTWITDQVIAAWQELFGVGLAHSVEVWEGDQLTGGLYGMAVGQLFCAESMFSRAENASKTALMKFCQHFSDHGGRLIDCQILNPHTASLGAREISREHYLQLLGTLQNQPLQADCWQPGHVI--MANLNAAPAKIQVRDLNFYYNKFHALKNINLDIARNQVTAFIGPSGCGKSTLLRTFNKMFQLYPEQRAEGQILLDGDNILDI-QDIALLRARVGMVFQKPTPFPMSIYDNIAFGVRLFEKLSRAEMDERVQWALTKAALWTETKDKLNQSGYSLSGGQQQRLCIARG…					MELKATSMGKRLAQHPYNRVRLLPAGVEVSGDRHEYIIPFNQLLGIQCKRGVVWGELEFQLPEDKVVRLHGTEWQETQQFYHYLLQSWHQWSQQMAEVCYQVLSELQHYLLSQVQRDSWLTRSDIRGFREKIEQKFSALPLPHERIPEFDQCQPLWLFCQSWLKSTEQQRSERNRQWTEEILERYRDFFNTVESSPLNPAQCRAVINGEDNLLVLAGAGSGKTSVLAARAAWLIKRKLASADQILLLAFGRDAADEMNKRVIKSTGEANVTARTFHSLALHIIQQSSNKQPKISQLETDADFRRKMLTDVWQQQCAEKKSFANGWRQWLQEELKWELPSDTFWQDEKLLSRVSGRLERWVSLMRNHGGAQAAMIDESPEDIRLLFGKRIRLLAPLMKAW…					MAMHLKDDLESDGEMSEINVTPFIDVMLVLLIIFMVAAPLATVDVKVNLPASTSVPQPRPDKPVYLSIKADKQLYVGNNEVSKEQLVSAIDSQTTGNKDTTIFFQADKDVDYATLMGVMDELRAAGYLKIGLMGLESAGSSAANMSEQQPQHADDSQELNNELKSRREKLAALRQNGVAFPNDFRRDTLSDKLHKQFDDKDSEQLEDLGIEVSVAGRMMTRRIMGKASFVTLQDNGGRIQLYVSRDDLAEGYYNEQFKKWDLGDILGARGKLFKTKTGELSIHCSELRLLTKALRPLPDKFHGLADQETRYRQRYLDLIANEESRHTFQVRSKIMAGIRQFMVKREFMEVETPMMQVIPGGASARPFITHHNALDIDMYLRIAPELYLKRLVVGGFDRV…					-MSNSGNVSWFGVLQRGQHYMKTWPDDKRLSPVFPEHRVGKAIRFAVRFMPPLAVFTLCWQIALHAQLGPAVASALFACSLPLQGLWWMGKRSMKPLPPSLLNWYHALREKLAEAGQATAMPEGPPTYQSLADILKRAFRQLDKTFLDDLMSILIDKNTKVICQGFTGGQGTFHSEQAIAYGTQMVGGVTPGKGGTTHLGLPVFNTVREAVEQTGATASVIYVPAPFCKDSILEAIDAGIKLIITITEGIPTLDM					-----MRYTLVSEMRECIDRMEWLLGQLSQQLQQLPLLSARVFALPPVMKGDEQQAVERISVRQITGEAALKLSLEHFSRLFMQQQSETVSTRSAVRLPGMLCLKADAGSFQKAEEWVQEINQLKKLLEKLITRDSGLSSEARFPFVHQHFPGLITLNAYRSVTLLPAPASVHFGWANKHIIKNVSRDDICRQLEKSLSAGRARAPWTREQWAEKVTEELEMITALPADAVLKIKRPVKVQPVARIWDTQQKKQR					VNKEKRYQILSRLRANNPHPTTELNFSSPFELLIAVLLSAQATDVSVNKATVGLFSKAPTPEKMLELGEEGVRECIKTIGLFNSKAANVIRTCQILVSKHLSQVPENREALEALPGVGRKTANVVLNTAFGWPTIAVDTHIFRVSNRTGFAPGKNVDLVEQKLLKVVPAEFKVDCHHWLILHGRYTCIARKPRCGSCLIEDLCEYREKTD--MNKVLLYCRSGFEKECAAEITARATELQVFGFARVKDNSGYVIFECYQYEDADKLIREIAFQSLIFARQMIVVGELLRDLPQEDRISPIVGMLTGVVEKGGDLRVEVPDTNEAKELLKFCRKFTVPLRAALRKEGILLNYESSKRPVVHVFFIASGTCYVGYSLPENNSSLFMGIPRLKFPSDAPSR…					MSKIVKVIGREIIDSRGNPTVEAEVHLEGGFVGLAAAPSGASTGSREALELRDGDKSRFLGKGVTKAVAAVNGPIADAVTGKDAKDQANIDKIMIELDGTENKSKFGANAILAVSLAAAKAAAASKGLPLYAHIAELNGTAGKFSMPLPMMNIINGGEHADNNVDIQEFMIQPVGASSIKEAIRIGSEVFHHLAKVLKAKGLNTAVGDEGGYAPNLASNAEALAVIAEAVKAAGYELGKDVTLAMDCAASEFYNKETGNYELKGEG-KTFTSQEFTHYLEQLTQQYPIVSIEDGLNESDWEGFAYQTKVLGDKLQLVGDDLFVTNTKILKEGIEKGIANSILIKFNQIGSLTETLAAIKMAKDAGYTAVISHRSGETEDATIADLAVGTAAGQIKTGSM…					MSALWLSICILLLAACALILTSGWRSGKDTSNQRDQLNKSFYRQRLTELEEDEQQGVVAEKHEMIAELQQTLLTDIPENQQQAKAR-TSGRWVLWLGLIVLVLITLGMYLKTGGLLQVMQWNQIRNDYPALRQRLMDPNAKNLSMQELQEFEVGLRTSLQSEPDNLNDWEMLGRLGMVLNNVPLSSQAFQRALKLSPNNTALKLDYAEVLVRSPDPEDNRQAEVMLGDMLKAEPQNLRILSLLAADSFTEQNYDKAIGYWQKMLTMIPADSKEADAVRKGIEQARTNAGQQTSKLTLNIAIAPAAEKMLTPNGILYISVTDGVSPVPVAVKRLPLSHFPLTITLDDSNAMMPERLLSAQHTIQVRARISRNGAANPQSGDWFGQTDKIQYNGQQTVAVE…
>T_sp_NML_06					>T_sp_NML_06					>T_sp_NML_06					>T_sp_NML_06					>T_sp_NML_06					>T_sp_NML_06					>T_sp_NML_06					>T_sp_NML_06					>T_sp_NML_06					>T_sp_NML_06
MTKSELIERLASQQTHIPAKAVEDAVKEMLEHMASTLAQGDRIEIRGFGSFSLHYRAPRTGRNPKTGDKVELEGKYVPHFKPGKELRDRANLALNAKA----MRLSRLFLILLLNAVGIALFFSWYLPANHGAWFDLDKSIFFAFNDRMVTHHGFAIFVAITNFRGFDVVSLIAMGLLYYSYWRKNDANGRHRMLAIGITMLISAVVLNQLGHRIPVVHSSPSLFFQNAHRAGELTGIPTKDGSSDSFPGDHGMMLMIFACFMWRYFGGRAFIKALIILVVFATPRVMAGAHWFTDIAVGSLSVVLVGMSWWLLTPGSDYLVNYLDKKLPRRKR------MPELPEVETSRRGIEPYLKGATVLHAVVRNSRLRWPVSAEILALSDQPILSVRRRAKYI…					MQTQEIKKIVLAYSGGLDTSAIIPWLKENYG-CEVVAFVANVGQDPEDLVGVEGKALQSGASECHVVDLREEFISDYVYPVLQTGALYEGTYLLGTSMARPIIAKAQVELALKVGADALCHGATGKGNDQVRFESTYTALAPQLKVVAPWREWDLRSREALLDYLKERNIPTTASLEKIYSRDENAWHISTEGGVLESTWNASNKDCWVWTTDPLEAPDQPEQVSVKVEKGQVVAVNGEALSPFKCLEKLNVLGAKHGVGRIDIVENRLVGMKSRGCYETPGGTIMVNALRAVEQLVLDRDSFKWREQLGLEMSYVVYDGRWFTPLRKALQASSESLAEDVNGEVVLQLYKGQVTAIQKKSDNSLYSEEFATFGEDEVYDHSHAGGFIRLYSLSSRIRA…					-VLPQLTTDPRHFPPPARALKDPQGLLAFGGDLSPPRMLSAYQQGIFPWFSPQDPILWWSPDPRAVIFPEQFHLSRSMARFHRRSPFHLTLDQDFSGVIQGCAQQRQDGTWITEEVITAWLMLFRLGHAHSVEVWQDDRLVGGLYGLSLGRLFCAESMFSRQENASKTALMMFCRHFQAFGGQLIDCQILNPHTASLGATEISRQDYLTRMRTLITQPLLPSCWQGMLQGMNRLNTHTSSAKIQVKDLNFHYGKF					MELKATSMGKRLAQHPYNRVRLLAAGVEVSGDRHEYIIPFNQLLGIQCKRGMVWGELEFQLADNQVVRLHGTEWQETQQFFQHLSTVWHQWSDEMAAISFQVLSDIHGQVMKLCQRDSWLTRREITGLRQTIEQGFAALPLPVARLSEFDDCRPLWAFCKAWLEATEAQRQERNRQWSQQVIERYAAFFSQCDSGPLNPSQCQAVVNGEDNLLVLAGAGSGKTSVLAARAAWLLERRAATPDQILLLSFGRGAASELSQRVACATGEAEVTASTFHSLALEILRQGSNKSPKITELESDEKQRRELLTRVWQQQCAEKKSAANGWRQWLQDELQWPLPEGPFWESDALANRLAVRLERWLALMREHGGAQAAMIEQAPEEIRALFGKRLRLMAPLLKAW…					MAMRLNEEADSDGEMSEINVTPFIDVMLVLLIIFMVAAPLATTDVRVNLPASTSKPQPRPEKPVYLSIKADNQLFVGEEAVSSPQLIAAIDALTGGNKETTIFFQADKEVDYASLMSVMDQLRGAGYLKIGLMGLESTAAH---MSEQQPQQADAIRELNNELKNRREKLSALRQNGVAFPNDFRRDTQSDKLHAEYDAKENEELEATGIEVSVAGRMMTRRIMGKAAFVTLQDAGGRIQLYVSRDDLPEGYYNEQFKKWDLGDILGARGKLFKTKTGELSIHCTELRLLTKALRPLPDKFHGLADQETRYRQRYLDLIANEESRNTFQIRSKIMAGIRQFMVEREFMEVETPMMQVIPGGASARPFITHHNALDIDMYLRIAPELYLKRLVVGGFDRV…					-MSSSGNVSWIGVLKRGQHYMETWPDDKRLSPVFPEQRIRKAVRFGVRFMPPLAVFTLCWQIALHAQLGPAVASALFACSLPVQGLWWMGKRSLKPLPPALLKWYHSLREKLEQAGQPTALPEGTPTYQSLADLLKRAFRQLDKAFLDDLMSILIDKNTKVICQGFTGGQGTFHSEQALAYGTQLVGGVTPGKGGTTHLGLPVFNTVREAVEQTGATASVIYVPAPFCKDSILEAIDAGIRLIITITEGIPTLDM					-----MRYTLISEIRDCVEQIEHGLQHLTAQLAEMPLVSARAFRLPGVQKGDELSEISSLKVQPFHGEGARRMALEHLRLLFMQQQSESLSTRSASRLPGILCVSADAESRARLTDQAQQINQQKALLEKLITRDSGLAPEARFPFVHQHLPGLITLNAYRTLTLEAAPASVHFGWANKHVIKNVTRDDICRQLEKSLAAGRARAPWTREQWAEKVAAELELISGLPVDAPLKIKRPVKVQPVARLRAEGSARQR					VNKEKRYQILSRLRDNNPHPTTELNFSSPFELLIAVLLSAQATDVSVNKATVSLFAQAPTPEKMLELGEEGVREAIKTIGLFNTKAVNVIKTCRILLEKHQGQVPENREALEALPGVGRKTANVVLNTAFGWPTIAVDTHIFRVSNRTGFAVGKNVDQVEEKLLKVVPAEFKVDCHHWLILHGRYTCIARKPRCGSCLIEDLCEYREKTE--MNKVLLYCRTGFEKECAAEITARATALEVFGFARVKDNSGYVIFECYQYEDADKLIRSIPFQSLIFARQMIVVGELLRDLPAEDRVTPITGMLTGAVEKGGELRVEVPDTNEAKELLKFCRKFTVPLRAALRQAGILLNYESAKRPVVHVFFIASGTCYVGYSYPENNSALFMGIPRLKFPADAPSR…					MSKIVKVIGREIIDSRGNPTVEAEVHLEGGFVGLAAAPSGASTGSREALELRDGDKSRFLGKGVTKAVAAVNGPIADAVTGKDAKDQANIDKIMIELDGTDNKSKFGANAILAVSLAVAKAAAASKGLPLYAHIAELNGTAGKFSMPLPMMNIINGGEHADNNVDIQEFMIQPVGAASIKDAIRIGSEVFHHLAKVLKAKGLNTAVGDEGGYAPNLSSNAEALAVIAEAVKAAGYELGKDITLAMDCAASEFYNKETGNYELKGEG-KTFTSQEFTHYLEELTKEYPIVSIEDGLDESDWDGFAYQTKVLGDKLQLVGDDLFVTNTKILKEGIEKGIANSILIKFNQIGSLTETLAAIKMAKDAGYTAVISHRSGETEDATIADLAVGTAAGQIKTGSM…					MSALWLSICILLLAAIALFLTSGWRAGKDTSNQRDQLNKTFYRQRLTELEQDEQQGVVAERQEMITELQQTLLTDIPDQ-QHQTSR-TSGRWVLWPGVVVLVVVTLGMYLKTGGLAQVMQWEQINAQYPQLRAQLMNPNDRSLSMQQLQEFAVGLRTSLQSDPQNMDNWAMLGRLGMVLNDIPLSTQAFQRALRLAPDNTALKLDYAEVLVRSPDPQDNRQAQLMLTELLKANPGNLRIYSLLAAVNYTQQNYDTAIGFWQKMLTMVPAGSKQADAIEQGIEQARTNAGQQTSKLTLNVGITPQAEKMLTPNGILYISVTDGVSPVPVAVKRIPLSHFPLTITLDDSNAMMQQRLLSAQHTIQVRARISRDGSANPQTGDWFGLTNKQPYNGHQTVTVE…
>P_sp_GM01					>P_sp_GM01					>P_sp_GM01					>P_sp_GM01					>P_sp_GM01					>P_sp_GM01					>P_sp_GM01					>P_sp_GM01					>P_sp_GM01					>P_sp_GM01
MTKSELIERLAGQHTHIPAKVVEDAVKEMLEHMATTLAQGERIEIRGFGSFSLHYRAPRTGRNPKTGDKVDLEGKYVPHFKPGKELRDRANIYG--------MRASRLITILLLNALGVMLFFSWYLPPDHGFWFGIDKAIFYGFNDQMVDHHGFALLVAITNFRGFDLVSLLAMGLLYLWFWRRETPQDRRRMLAIGITMLLSAVVLNQLGHLLPVQHSSPTLFFENVHRVSELTGIPAKDASKDSFPGDHGMMLIIFTCFMWRYFGFRAFLVGLVITVVFALPRVMAGAHWFTDIAVGSLSVVLVGMSWCLLTPFSDKLVNWLNRSLPGKYKPRT---MPELPEVETSRRGIEPHMVGATILHAVVRNPRLRWPVSHEIHALSDQPVLSVQRRAKYL…					MSTQNIKKIVLAYSGGLDTSAIIPWLKENYGGCEVVAFVADIGQERGDLEGVEKKALQSGASECHVVDLREEFISEYVYPVLQTGALYEGTYLLGTSMARPIIAKAQVELALKVGADALCHGATGKGNDQVRFETTYTALAPQLKVVAPWREWDLRSREALLDYLKERNIPTTASLEKIYSRDENAWHISTEGGVLESPANAPNKDCWVWTVDPLEAPDQPENVTVTVEKGRVVAVNGEKLSPFQCLEKLNVLGAKHGVGRIDIVENRLVGIKSRGCYETPGGTIMVNALRAVEQLVLDRDSFKWREQLGHEMSYVVYDGRWFAPLRKSIQAAAESLAAEVNGEVVLQLYKGQATAIQKTSANSLYSEEFATFGEDEVYDHRHAGGFIRLFSLSSRIRA…					MRLIQLSRDSLNFPPPEMALREPNGLLAMGGDLSPARLMNAYQRGIFPWFSPGDPILWWSPDPRAVMLPESFHLSRSMARFHKRSPFRVTMNHAFPQVLEGCASGRQEGTWITFEVKRAWLRLYELGHAHSIEVWCGQQLVGGMYGLALGQIFCGESMFSRQENASKTALWVFSQHFLAHQGRLIDCQVLNPHTASLGAVEIPRVDYLQYVQTLAWQPVSESCWQTQTLF--MSNVTSSAGKIQVRNLNFYYGKFHALKNINLDITKNQVTAFIGPSGCGKSTLLRTFNKMYSLYPEQRAEGDILLDGDNILASNQDIALLRARVGMVFQKPTPFPMSIYDNIAFGVRLFEKLSRADMDERVQWALTKAALWNETKDKLHQSGYSLSGGQQQRLCIARG…					MELKATSMGKRLAQHPYNRVRLLAAGVEVSGDRHEYLIPFNQLLNIACKRGMVWGELEFLLPEEKVVRLHGTEWQETQRFFHYLQHAWQQWSQEMSEVSAEVLVVLEQEILAFTEQDRWLKRSELSAVKESISRQFSALPLPLERIAEFDNCRERWAFCQQWLEQGETAIRQRNRAWTSKILKDYQEFFSTIETTPLNPSQCEAVVNGEDALLVLAGAGSGKTSVLVARAGWLLKRKLAQPDQILLLAFGRQAAEEMNDRIQTRLGESAIQARTFHALALHIIREGSNKQPVISKLESDSKARRQLLIETWREQCNSKKAQASGWRQWLQDELEWEIPEGPFWQDDKLAQRIASRMERWLGLMRMHGGAQAAMIADVAEEQRDNFSKRVKLMAPLLKAW…					MAMRLNDDSVGDGEMHEINVTPFIDVMLVLLIIFMVAAPLATVDVRVNLPASTSAPQPRPEKPVYLSIKEDKQIYIGNDAVTKETLVNTLTAQTEGKKDTTIFFQADKSVDYATLMEVMDQLREAGYLKIGLMGMETVKK----MSEQQPQSADAALELNNELKARREKLNALREKGVAFPNDFRRDTTSDLLHASYDAKENEELEALGVEVSVAGRMMTRRIMGKASFATLQDVGGQIQIYVSRDDLPEGVYNEQFKKWDLGDILGARGKLFKTKTGELSIHISELRLLTKALRPLPDKFHGLADQETRYRQRYLDLISNDESRNTFKVRSKIMAGIRQFMVNRDFMEVETPMMQVIPGGASARPFITHHNALDIDMYLRIAPELYLKRLVVGGFDRV…					MANETDNPGWFSLFQRGQRYMKTWPADKRLAPVFPENRVVNTTRFAIRFMPPLAIFTLTWQIALGGQLGPAIATALFACSLPMQGLWWLGKRSVTPLPPTLLQWFHEVRTKLEEAGQAIAPVDGKPTYQSLADVLKRAFKQLDRTFLDDLMSILIDKNTKVICQGFTGGQGTFHSEQALAYGTQLVGGVTPGKGGTTHLGLPVFNTVREAVEATGATATVIYVPAPFCKDGILEAIDAGIKLIITITEGIPTLDMLTVKVKLDEAGVRMIGPNCPGVITPGECKIGIMPGHIHQPGRVGIVSRSGTLTYEAVKQTTDIGYGQSTCVGIGGDPIPGSNFIDILKLFQDDPQTEAIVMIGEIGGSAEEEAAAYIKAHVTKPVVGYIAGVTAPKGKRMGHAG…					----MARYDLVADLHECVNALEAALSALRQQIELQPLLIARVFSLPEIEKGREHDEIERIAVTQHLGKTAREMALAHYCRLFMQHQSEKLSTKAAVRLPGAICIQAEGEMHAQITQQVAEINTLKQRLEQLITVESGLPSEARFEFVHQHLRGLITLNAYRSVTLLNSPDSLRFGWANKNIIKNVTRDAVVEQLERSLKANRAQAPWTREQWAEKVQQELEAILALPAGAKLKIKRPVKVQPIARVWRASEKKQV					VNKEKRAQILTRLRDENPHPTTELHFSSPFELLIAVLLSAQATDVSVNKATAKLYPVANTPATILALGVDGVKEYIKTIGLFNSKAENVIKTCRILLEQHGGEVPEDRAALEALPGVGRKTANVVLNTAFGWPTIAVDTHIFRVSNRTRFAPGKNVEEVEDKLLKVVPSAFKVDCHHWLILHGRYTCVARKPRCGSCLIEDLCEFDAKTEL-MNKVLLYCRPGFEKECAAEISAKAAEREIYGFPRVKDDSGYVLYECYQQEDAEKLIQTLPFAELIFARQMLVVGELLRDLPQEDRITPIVGMLTGVVEKGGELRVEVPDTNEAKELTKFCRKLTVPLRASLRESKILLNYETPKRPVVHVFFIAPGTCYVGYSLPENNSPFYMGIPRLKFPSDAPSR…					------------------------------------------------------------------------------------------------------------------------AAAASKGLPLYAHIAELNGTPGKYSMPLPMMNIINGGEHADNNVDIQEFMIQPVGAPTLKEAIRMGSEVFHHLAKVLKSKGMGTAVGDEGGYAPNLGSNAEALAVIAEAVKAAGYELGKDITLAMDCAASEFY--					MTGFWITLIILLLAAIALFLRAGWRQREAVTGDRDRLNTDFYQQRLRELEHDEEEGVVAERPEMVRELQQTLLTDVPQQ-DAATIH-HSSRWVLLPGVIVLLVVSVGMYLKTGGLTQQTAFVSVQQEYPALRARVMDPKAQPLTMEELARLQLGLRNSLQNDANNLNDWAMLGRLGMVLNNATDASQAFEHALQLAPDNLELQQDYAEVLTRSSDPQDNRQANVMLKELLKRDHSDVRTLSLLAFNAFEQQQYNEAIGAWQVMLKLLPPGDRRITMIERSIEQAKTDAGQQNSQLALTVSLTPQAEKMLPQGGVMYISVSDGVSPVPVAVKRLPLSHFPLSLTLDDSNAMMPDRLLSAQHQVQVRVRISRDGSANPQSGDWFGLSAVTPWDGHQQLAVE…
>E_pyrifoliae					>E_pyrifoliae					>E_pyrifoliae					>E_pyrifoliae					>E_pyrifoliae					>E_pyrifoliae					>E_pyrifoliae					>E_pyrifoliae					>E_pyrifoliae					>E_pyrifoliae
MTKSELIERLAGQQSHIQAKVVEDAVKEMLEHMATTLSEGERIEVRGFGSFSLHYRAPRTGRNPKTGDKVELEGKYVPHFKPGKELRDRANIYGG-------MTLKRILIILLLNTVGLLLFFSWYLPADHGLWFIIDKTIFYWFNRHMVTSPTLLWLVAITNFRAFDGVSLLAMGGLYLWFWRRQTPAGRRRMFAIGITMLISAVGLNQLGHLIPVSHPSPTRFFPDVNHVAELTGIPTKDSSADSYPGDHGLMLMIFACFMLRYFTRGAFAVAVLIVLLFALPRVMIGAHWFTDIAVGSLSIALVGMSWWLLTPASDYLVNWLYRHLPGKYKPVK---MPELPEVETSRRGIEPHLVGATILHAVVRNARLRWPVSQEIHALSDQPVLSVQRRAKYL…					MQDKSIKKIVLAYSGGLDTSAIIPWLKENYGGCEVVAFVADIGQERGDLEGVEQKALQSGASECHVVDLREEFISEYVYPVLQTGALYEGTYLLGTSMARPIIAKAQVELALKVGADALCHGATGKGNDQVRFETTYTALAPQLKVVAPWREWDLRSREALLDYLKERNIPTTASLEKIYSRDENAWHISTEGGVLESPWNAPNKDCWVWTVDPLEAPDQPEQVTVAVEKGRVVAVNGEALSPFGCLDKLNAIGARHGVGRIDIVENRLVGIKSRGCYETPGGTIMVNALRAVEQLVLDRDSFKWREQLGLEMSYVVYDGRWFAPLRKSIQASAEALAEEVNGEVVLQLYKGQVTAIQKKSANSLYSEEFATFGEDEVYDHRHAGGFIRLFSLSSRIRA…					MRLIQLSRESLNFPPPEKALREPNGLLAMGGDLSPQRLLNAYHRGIFPWFSPGDPILWWSPDPRAILLPQHFHLSRSMKRFHQHSSYRVTLNQRFREVIEGCACDRQEGTWITHEVKHAWQRLHALGHAHSVEVWHGDELVGGMYGLALGQIFCGESMFSRRENASKTALLVFCHYFLQQGGKLIDCQVLNPHTRSLGAQEISRASYLEYVSSLAFQPLSANCWRAQRLF-IKMVDNSSAQTIQVRNLNFYYGKFHALKNINLDIAKNQVTAFIGPSGCGKSTLLRTFNKMFSLYPDQRAEGEILLDGENILTASQDIALLRARVGMVFQKPTPFPMSIYDNIAFGVRLFEKLSRADMDERVQWALTKAALWTETKDKLHQSGYSLSGGQQQRLCIARG…					MELKATSLGKHLAQHPYNRVRLLTAGVEVSGEKHEYMIPFNQLLAIKCKRGLVWGELEFTLPDNKVVRLHGTEWSETQRFYHHLSQLWQQWSREMSDVSATVLAEQKHQIQQAERQDKWLTRSDITGWQQAIHRAFASVPLPAERLEEFDNCRSAYYFCLKWLNEGEYQRIKRNEDWTERMLQQHTGFFNQVESSPLNASQARSVVNGEDAVLVLAGAGSGKTSVLVARAGWLMMRRQANAGQLLLLAFGRQAAEEMNDRIRARLGTEDLQARTFHALALHIIQQAGNKSPAISRLETDSDKRQSLLINVWRQQCDEKKAQANGWRQWLTDELKWDVSDGSFWQDDRLARRLVGRLESWLGLMRMHGVAQAAMIETAPEEVRLLFTKRVKLMAPLMKAW…					MAMRLDEELDSNGEMHEINVTPFIDVMLVLLIIFMVAAPLATVDVRVDLPASTSAPQPRPEKPVYLSIKADKQLFIGNDAVSEETLIDTLIQQTEGKKDTTIFFQADKSVEYETLMNVMDKLRQAGYLKIGLMGMEAAGK----MSEQQPQAADAALELNNELKARREKLVALRETGVAFPNDFRRDRTSDQLHAEFDGKENDELEALGIEVSVAGRMMTRRIMGKASFVTLQDVGGRIQLYVSRDDLADGIYNEQFKKWDLGDILGARGKLFKTKTGELSIHCSELRLLTKALRPLPDKFHGLADQETRYRQRYLDLIANDDSRKTFKIRSQIMAGIRNFMVGRDFMEVETPMMQAIPGGASARPFITHHNALDLDMYLRIAPELYLKRLVVGGFDRV…					MANESGSVGWFKLFQHGQHYMKTWPVDKRLAPMFPENRVARATRFATRFMPPLAVFCLSWQIALGGQLGPAVATALFACSLPMQGLWWLGKRSVTPLPPGLLGWFHDVRQKLQAAGQALAPLEGKPTYQSLADVLRRAFKQLDKTFLDDLMSILIDKNTKVICQGFTGGQGTFHSEQALAYGTQLVGGVTPGKGGSEHLGLPVFNTVREAVEATGATASVIYVPAPFCKDGILEAIDAGIKLIITITEGIPTLDMLTVKVKLDEAGVRMIGPNCPGVITPGACKIGIMPGHIHQPGRIGIVSRSGTLTYEAVKQTTDIGYGQSTCVGIGGDPIPGSNFIDILKLFQDDPQTEAIVMIGEIGGSAEEEAAAFIKEHVTKPVVGYIAGVTAPKGKRMGHAG…					----MSRYDVVEQLHLCVAQLEQELNALQQQMLNLRLLAARVFELPGVEKGKEHDPLTQIAVTQLTGQPALVRALSHYGRLFMQHQSEKLSTKAAVRLPGAICLEAGNAQSALLRQQTVAINQLKQRLEQLITVESGLPSEERFEFVHTHLRGLITLNAYRTIVLVDDADSVRFGWANKHIIKKVSVEEMLEKLQKSQQSGRAVAPWTREQWAERVADEIATLKSLPPGAALKIKRPVKVQPVARIWHAQQQKQI					VNKEKRHNILLRLRDNNPHPTTELNFTSPFELLISVLLSAQATDVSVNKATARLYPAANTPAAILALGVDGVKEYIKTIGLFNSKAENVIKTCRMLLELHGGKVPQSREALEALPGVGRKTANVVLNTAFGWPTIAVDTHIFRVCNRTRFAPGKNVEEVEERLLKFVPKEFKVDCHHWFILHGRYTCVARKPRCGSCLIEDLCEFKDKVEI-MNKILLYCRQGFEKECAAEITAKAAGHEIFGFARVKEGSAYVLFECYQQGEAEKLLAELPFSELIFSRQMIVVGELLRDLPPEDRITPLSGMLTGVVEKGGELRVEVPDTNASKELLKFCRKFTVPLRASLRKDGILLNYESNKRPVVHVFFIASGCCYVGYSLPGNNSPLFMGIPRLKFPSDAPSR…					MSKIVKVIGREIIDSRGNPTVEAEVHLEGGFVGLAAAPSGASTGSREALELRDGDKSRFLGKGVTKAVGAVNGPIAEAVTGKDAKDQANIDKIMIDLDGTENKSKFGANAILAVSLAAAKAAAAAKGMPLYEHIAELNGTPGKFSMPLPMMNIINGGEHADNNVDIQEFMIQPVGAKTLKEAVRIGSEVFHNLAKVLKSKGMSTAVGDEGGYAPDLGSNAEALAVIAEAVKAAGYELGKDVTLAMDCAASEFY--KDGKYVLAGEGNKAFTSEEFTHFLEDLTKQYPIVSIEDGLDESDWDGFAYQTKVLGDKIQLVGDDLFVTNTKILKEGIDKGIANSILIKFNQIGSLTETLAAIKMAKDAGYTAVISHRSGETEDATIADLAVGTAAGQIKTGSM…					MSGFWLLIALLLLASCTLVVLAGSRSSTGSAPDRDTLNQRFYHQRLRELEDDEAQGVVDGRPEIIHELQQALLMDIPEQ-PAAQRR-QISRWVLLPGVLVLLLVCCGVYFKAGGLQQLLAWQQVQNELPVLRARAMNPNARPLTMEQLARLALGVRSELQQSPDNFNDWMLLGRLGMVLNNASTASQAFRRALQLSPNDTGARMSYAEVLARSGDPQDNREASAILNEMVSHDRRNLQLLGLLAFNNFSLQNYAQAMDIWQKMLQLLAADDGRVALIQRSIAEAKSALGGQENRLALTVRLSDAAEKMLPLRGVLYISVTDGNSPIPVAVKEVPLSHFPLSLTLDDSNAMMPDRLLSAQRQLQVRVRISRDGSAHPQPGDWYGLSAVTPFTGQQQLAVD…
>P_wallisii					>P_wallisii					>P_wallisii					>P_wallisii					>P_wallisii					>P_wallisii					>P_wallisii					>P_wallisii					>P_wallisii					>P_wallisii
MTKSELIERLAGQHTHIPAKVVEDAVKEMLEHMATTLAQGERIEIRGFGSFSLHYRAPRTGRNPKTGDKVELEGKYVPHFKPGKELRDRANIYG--------MRASRLITILLLNALGVMLFLSWYLPPDHGFWFAIDKGIFFGFNDQMVDHHGFALLVAITNFRGFDAVSLLAMGLLYLWFWRRETPEGRRRMLAIGITMLLTAVILNQLGHLLPVKHSSPTLFFENVHRVSELTGIPAKDASKDSFPGDHGMMLIIFACFMWRYFGFRAFLVGMAIVVIFALPRIMAGAHWFTDIAVGSLSVILVGLSWWLLTPASDKLVNWLFRSLPGKYKPRA---MPELPEVETSRRGIEPHLVGETILHAIVRNPRLRWPVSHEIHTLSDQPVISVQRRAKYL…					MSTQNIKKIVLAYSGGLDTSAIIPWLKENYGGCEVVAFVANIGQDPADLEGVEKKALQSGASECHVVDLREEFISEYVYPVLQTGALYEGTYLLGTSMARPIIAKAQVELALKVGADALCHGATGKGNDQVRFETTYTALAPQLKVVAPWREWDLRSREALLDYLKARDIPTTASLEKIYSRDENAWHISTEVA------------CW----------------------------------------------RAHGMRQTKIA----------GC-----GPLI-----------------RRKRRISQRMS----------P--------------------------------------------------------------------------…					MRLIQLSRDSLNFPPPEMALREPNGLLAMGGDLSPARLINAYQQGIFPWFSPGDPILWWSPDPRAVMLPDAFHLSRSMARFHRRSPYRVTMNHAFAQVLEGCATGRQEGTWITFEVKRAWLRLYELGHAHSIEVWDDNRLVGGLYGLALGQIFCGESMFSRQENASKTALWVFSQHFVAHQGRLIDCQVLNPHTASLGAVEIARVDYLQYVQTLAAEPVLSGCWQTQTLF--MSMANTAAGKIQVRNLNFYYGKFHALKNINLDIAKNQVTAFIGPSGCGKSTLLRTFNKMYSLYPEQRAEGDILLDGDNILASHQDIALLRARVGMVFQKPTPFPMSIYDNIAFGVRLFEKLSRADMDERVQWALTKAALWNETKDKLHQSGYSLSGGQQQRLCIARG…					---------------------------------------------------------------------------------------------------------------------------------------------------------------------------------------------------------------------------------------------------------------					MAMRLNDDSVGDGEMHEINVTPFIDVMLVLLIIFMVAAPLATVDVRVNLPASTSAPQPRPEKPVYLSIKADKQIYIGNDAVTKETLVNALTAQTEGNKETTIFFQADKSVDYETLMSVMDQLREAGYLKIGLMGMETVKK----MSEQQPQSADAALELNNELKARREKLSALREKGVAFPNDFRRDSLSDQLHASYDEKSNEELEALGVEVSVAGRMMTRRIMGKASFATLQDVGGQIQIYVSRDDLPEGVYNEQFKKWDLGDILGARGKLFKTKTGELSIHISELRLLTKALRPLPDKFHGLADQETRYRQRYLDLISNDESRHTFKVRSKIMAGIRQFMVNRDFMEVETPMMQVIPGGASARPFITHHNALDIDMYLRIAPELYLKRLVVGGFDRV…					----------------------------------------------------------------------------------MQGLWWLGKRSVTPLPPTLLSWFHEVRTKLEEAGQAIAPVDGKPTYQALADVLRRAFKQLDRTFLDDLMSILIDKNTKVICQGFTGGQGTFHSEQALAYGTQLVGGVTPGKGGTTHLGLPVFNTVREAVEATGATATVIYVPAPFCKDGILEAIDAGIKLIITITEGIPTLDM					-----MRYDLVADLHECVNALEYGLGELRQMLEQQPLLVARVFSLPEIEKGHEHDEIARIDVTQHLGKRAREMALAHYCRLFMQHQSEKLSTKAAVRLPGAICIEADDQMNQHITQQVAEINALKQRLEHLITVESGLPSEARFEFVHQHLRGLITLNAYRSVTVLNAPDTLRFGWANKNIIKNVTREAVIEQLERSLKANRAQAPWTREQWAEKVQQELEAIRALPATAKLKIKRPVKVQPIARIWRASEKKQI					VNKEKRLQILTRLRDENPHPTTELNFSSPFELLIAVLLSAQATDVSVNKATAKLYPVANTPAAIMALGVDGVKEYIKTIGLFNSKAENVIKTCRILLEQHGGEVPEDRAALEALPGVGRKTANVVLNTAFGWPTIAVDTHIFRVSNRTRFAPGKNVEEVEEKLLKVVPPAFKVDCHHWLILHGRYTCVARKPRCGSCLIEDLCEYDAKNDTPMNKVLLYCRPGFEKECAAEISAKAAEREIYGFPRVKDDAGYVLFECYQPEDAEKLLRTLPFAELIFARQMLVVGELLRDLPPEDRITPITGMLTGVVEKGGELRVEVPDTNEAKELTKFCRKLTVPLRASLRDSKILLNYESPKRPVVHVFFIAPGTCYVGYSLPENNSPFYMGIPRLKFPSDAPSR…					-------------------------------------------------------------------------------------------------------------------------------------------------MPLPMMNIINGGEHADNNVDIQEFMIQPVGAKNVKEAIRMGSEVFHNLAKVLKAKGMSTAVGDEGGYAPNLGSNAEALAVIAEAVKAAGYELGKDITLAMDCAASEFY--					MTGFWITLIILLAAATALFLGAGWRQREASRGDRDRLNTDFYQQRLHELARDEAEGVVGERPEMVRELQQTLLTDVPGA-DAVRSH-TSSRWILLPGVIVLLLVSVGMYLKTGGLSQLAGWLSVQQAYPALRARVMDPNAQPLTMEELARLQLGLRTSLQNDPQNLNDWAMLGRLGMVLNNATDASQAFEHALQLAPDNLELQQDYAEVLTRSSDPQDNRQANILLKDLLKRDHSNVRTLSLLAFNAFEQQQYNEAIGAWQVMLKLLPAGDKRITMIERSIEQAKTDAGQQNTQLNLTVSLAPEAEKMLPQGGVMYISVSDGVSPVPVAVKRLPLSHFPLSLTLDDSNAMMPDRLLSAQHQVQVRVRISRDGSANPQSGDWFGLSALTPWDGHPQLAVE…
>P_agglomerans					>P_agglomerans					>P_agglomerans					>P_agglomerans					>P_agglomerans					>P_agglomerans					>P_agglomerans					>P_agglomerans					>P_agglomerans					>P_agglomerans
MTKSELIERLAGQHTHIPAKVVEDAVKEMLEHMATTLAQGERIEIRGFGSFSLHYRAPRTGRNPKTGDKVDLEGKYVPHFKPGKELRDRANIYG--------MRVTRLITILLLNALGVVLFLSWYLPPEHGFWFGVDKSIFFGFNSQMVTHPLFALIVAITNYRGFDAVSLLAMGLLYLSIWRRETPQAQRRMLAIGITMLLTAVVLNQLGHLLPVKHSSPTLFFENVHRVSELTGIPAKDASKDSFPGDHGMMLIIFACFIWRYFGFSRFLIATAIVVIFSLPRIMAGAHWFTDVAVGSMSVVLVGLSWWLLTPASDVLVNWFYRKLPGKYKPVT---MPELPEVETSRRGIEPHLVGETILHAVVRNSRLRWPVSQEILELSDQPVLSVQRRAKYL…					MQTQNIKKIVLAYSGGLDTSAIIPWLKENYGGCEVVAFVADIGQERGDLEGVEKKALQSGASECHVVDLREEFISDYVYPVLQTGALYEGTYLLGTSMARPIIAKAQVELALKVGADALCHGATGKGNDQVRFETTYTALAPQLKVVAPWREWNLRSREALLDYLKERNIPTTASLEKIYSRDENAWHISTEGGVLESPANAPNKDCWVWTVDPLEAPDQPEEVTVTVEKGRVVAVNGEKLSPFQCLEKLNVLGAKHGVGRIDIVENRLVGIKSRGCYETPGGTIMVNALRAVEQLVLDRDSFKWREQLGHEMSYVVYDGRWFAPLRKSIQAAAESLAEEVNGEVVLQLYKGQATATQKRSANSLYSEEFATFGEDEVYDHRHAGGFIRLFSLSSRIRA…					MRLVQLSRESLQFPPPEMALREPNGLLAMGGDLSPARLLNAYQRGIFPWFSSGDPILWWSPDPRAVLLPEQFHLSRSMKRFHSRSPYRVTMNESFAEVIEGCATGREEGTWITFEMKRAWLRLYELGHAHSIEVWDEHQLAGGMYGLAMGQIFCGESMFSRQQNASKTALWVFCQHFLRHQGRLVDCQVLNPHTASLGAQEIPRADYLQYVQSLACQPVSDGCWQTQTLF--MSIATASADKIQVRNLNFYYGKYHALKNINLDIAKNQVTAFIGPSGCGKSTLLRTFNKMYSLYPDQRAEGDILLDGENILATQQDISLLRARVGMVFQKPTPFPMSIYDNIAFGVRLFEKLSRADMDARVQWALTKAALWNETKDKLHQSGYSLSGGQQQRLCIARG…					VELKATSMGKRLAQHPYNRVRLMAAGVEVSGDKHEYLIPFNQLLDIACKRGLVWGELEFLLADEKVVRLHGTEWQETQRFHHYLLQAWQSWSLEMSAVCREVLQALRDEIEAFGAQDRWLNRHELQALKTNILKQFDALPMPLSRLKDFADCRDNWQFCQRWLEQGETALRQRNRDWTAAMLTRYQDFFASVESTPLNQSQCEAVVNGENSLLVLAGAGSGKTSVLVARAGWLMQRKLASADQILLLAFGRQAAEEMNARIQSRLSAADIQARTFHSLALHIIREGSNKQPVISKLESDADARRTLLIQQWRQQCHEKKAQANGWRQWLRDELEWELPEGPFWEDDRLANRLASRLERWLGLMRMHGGAQAAMIADVPEEIRDLFSKCIKLMAPLLKAW…					MAMRLNDDLETDGEMHEINVTPFIDVMLVLLIIFMVAAPLATVDVRVNLPASTSAPQPRPEKPVYLSIKADKQLYVGNDQVTPESLVNVLTNQTQGNKETTIFFQADKSVDYETLMSVMDKLRTAGYLKIGLMGMETVKK----MSEQQPQSADAAVELNNELKARREKLSVLRANGVAFPNDFRRDSLSNQLHESYGEKSNEELEDLGIEVSVAGRMMTRRIMGKASFVTLQDVGGRIQLYVSRDDLAEGIYNEQFKKWDLGDILGARGKLFKTKTGELSIHCSELRLLTKALRPLPDKFHGLADQETRYRQRYLDLIANEESRNTFRIRSQIMAGIRQFMVGRDFMEVETPMMQVIPGGASARPFITHHNALDIDMYLRIAPELYLKRLVVGGFDRV…					MANESGSTNWFRMFQRGQHYMKTWPADKRLAPMFPENRVSSATRFAIRFMPPLAIFTLTWQIAMGGQLGPAVATALFACTLPMQGLWWLGKRSVTPLPPTLLNWFHEVRARLEEAGQATAPVEGKPTYQALADLLKRAFKQLDRTFLDDLMSILIDKNTKVICQGFTGGQGTFHSEQALAYGTQLVGGVTPGKGGTTHLGLPVFNTVREAVEATGATATVIYVPAPFCKDGILEAIDAGIKLIITITEGIPTLDMLTVKVKLDEAGVRMIGPNCPGVITPGECKIGIMPGHIHQPGRVGIVSRSGTLTYEAVKQTTDIGYGQSTCVGIGGDPIPGSNFIDILKMFQDDPQTEVIVMIGEIGGSAEEEAAAFIKEHVTKPVVGYIAGVTAPKGKRMGHAG…					----MTRYDLVADMHQCVNDLELALGELRQQIEAQPLLIARVFSLPPVVKGREHEAITRIAVEQHLGESALKMALDHYCRLFMQHQSEQLSTKAAVRLPGALCIECDAQQEAEIGALVDVINQLKARLEQLITVDSGLPSEARFEFVHQHLRGLITLNAYRTITLLSAPDSLRFGWANKHIIKNLKREEVIAQLEKSLKSGRAKAPWSREQWAEKVQEELASVRALPASARLKIKRPVKVQPVARVWRADEQKQT					VNQTKRTEILRRLQQNNPHPTTELNFSTPFELLIAVLLSAQATDVSVNKATAKLYPVANTPAAMLALGVDGVKEYIKTIGLFNSKAENVIKTCRILLEQHNGEVPEDRAALEALPGVGRKTANVVLNTAFGWPTIAVDTHIFRVSNRTKFAPGKNVEEVEQKLLKVVPAAYKVDCHHWLILHGRYTCVARKPRCGSCLIEDLCEYPDKVE--MNKVLLYCRPGFEKECAAEISAKAAEREIYGFPRVKDDSGYVLFECYQFEDAERLARELPFEDLIFARQMLVVGEMLRDLPQEDRITPIVGMLTGVVEKGGELRVEVPDTNEAKELTKFCRKFTVPLRSALRESKILLNYESPKRPVVHVFFIAPGTCYVGYSIRENSSPFYMGIPRLKFPSDAPSR…					MSKIVKVIGREIIDSRGNPTVEAEVHLEGGFVGLAAAPSGASTGSREALELRDGDKSRYLGKGVTKAVAAVNGPIAEAVKGKDAKDQANIDKIMIDLDGTENKSNFGANAILAVSLAAAKAAAASKGQPLYEHIAELNGTPGKYSMPLPMMNIINGGEHADNNVDIQEFMIQPVGAPNLKEAIRMGSEVFHSLAKVLKSKGMSTAVGDEGGYAPNLGSNAEALAVIAEAVKAAGYELGKDITLAMDCAASEFY--KDGKYVLAGEGGKSFTSEEFTHFLEDLTKQYPIVSIEDGLDESDWDGFAYQTKVLGDKIQLVGDDLFVTNTKILKEGIDKGIANSILIKFNQIGSLTETLAAIKMAKDAGYTAVISHRSGETEDATIADLAVGTAAGQIKTGSM…					MSAFWITLFLLLLAACTLFLAAGWRQRQASTGDRDRLNQRFYHQRIDELAQDEDQGVVAERPLMERELQQTLLADIPPA-QTMKSH-SSSRWILLPGLIVLIGVSLGTYLKTGGLAQLTGWKQVQQAYPELRARLMDPGAKPLSMEELARLQLGLRTALQTEPDNLADWTMLGRLGMVLNNTDTASQAFEHALQLAPNDLALKQDYAEVLTRSPDPQDNRQASLLLQALLKADPQNLRTLSLLAFNAYGQQQYGQAIDAWQTLLGLLPAGDSRHAMIARSIEKARSAAGQQSRQLALTVTLAPKAEKMLPQDGVLYISVSDGASPMPVAVKRMPLSHFPLSLTLDDSNAMMPDRLLSAQHQVEVRVRISRDGSANPRPGDWLGLSAVTPWDGHQPIAVE…
>P_s_stewartii					>P_s_stewartii					>P_s_stewartii					>P_s_stewartii					>P_s_stewartii					>P_s_stewartii					>P_s_stewartii					>P_s_stewartii					>P_s_stewartii					>P_s_stewartii
MTKSELIERLAGQHTHIPAKVVEDAVKEMLEHMATTLAQGERIEIRGFGSFSLHYRAPRTGRNPKTGDKVDLEGKYVPHFKPGKELRDRANIYG--------MHATRLVTILLLNALGMMLFFSWYLPPHHGFWFEIDKGIFFAFNNEMVAHPAFALLVAITNFRGFDAVSLLAMGLLYLWLWYRETPTGRRRMLAIGITMLVTAVVLNQAGHLLPVKHASPTLFFDGVHRVSELTGIPAKDASKDSFPGDHGMMLMIFAAFMWRYFGFRPFLVGVVIVVLFALPRVMAGAHWFTDITVGSLSVVLVGLSWWLLTPASDYLVNWFYHKLPGKNKPQG---MPELPEVETSRRGIEPHLVGQTILHAVVRNARLRWPVSNEILALSDQPVLSVQRRAKYL…					MQTQNIKKIVLAYSGGLDTSAIIPWLKENYGGCEVVAFVADIGQERSDLEGVDKKALQSGASECHVVDLREEFISDYVYPVLQTGALYEGTYLLGTSMARPIIAKAQVELALKVGADALCHGATGKGNDQVRFETTYTALAPQLKVVAPWREWDLRSREALLDYLKARNIPTTASLEKIYSRDENAWHISTEGGVLESPSNAPNKDCWVWTVDPLEAPDQPEDVTVTVEKGRVVAVNGERLSPFQCLEKLNVLGAKHGVGRIDIVENRLVGIKSRGCYETPGGTIMVNALRAVEQLVLDRDSFKWREQLGHEMSYVVYDGRWFAPLRKSIQAAAESLAEEVNGEVVLQLYKGQATATQKRSANSLYSEEFATFGEDEVYDHRHAGGFIRLFSLSSRIRA…					MRLVQLSQESLRFPPPETALREPNGLLAMGGDLSPARLLSAYQQGIFPWFSPGDPILWWSPDPRAVLFPTQFHLSRSMKRFHQQSPYRVTMNEAFGDVVDGCALGREEGTWITFEVKRAWQKLYELGHAHSIEVWRDQTLAGGMYGLALGQIFCGESMFSLQPNASKTALLVFCQHFIKHGGQLVDCQILNPHTASLGAVEIARDRYLEQVKNLASLAVDSGCWRNQTLF--MSTATASAGKIQVRNLNFYYGKFHALKNINLDIAKNQVTAFIGPSGCGKSTLLRTFNKMYSLYPEQRAEGDILLDGDNILASNQDIALLRARIGMVFQKPTPFPMSIYDNIAFGVRLFEKLSRADMDERVQWALTKAALWTETKDKLHQSGYSLSGGQQQRLCIARG…					VELKATSMGKRLAQHPYHRVRLLSAGVEVSGDKHEYLIPFNQLSDITCKRGMVWGELEFLLADNKVVRLHGTEWQETQRFFHYLMQSWQSWSQEMSEVCAAVLQALRDDIQGFSEQERWLKRSELQAIKDKIRKQFDALPLPLSRIEQFDSCRENWAFCQYWLQQGETAMTQRNRDWTAAMLTRYRDFFATVESTPLNESQAEAVVNGEDAVLVLAGAGSGKTSVLVARAGWLLQRRLAAADQILLLAFGRHAAEEMNDRIQSRLGAGDIQARTFHALALHIIREGSHKQPVISKLESDPDARRTWLIDHWRQQCNEKKAQANGWRQWLRDELEWEVSEGPFWQDDRLAQRLASRLERWLGLMRMHGGAQAAMIEDVPDALRDVFSKRIKLMAPLLKAW…					MAMRFNDSSETDGEMHEINVTPFIDVMLVLLIIFMVAAPLATVDVRVNLPASTSAPQPRPEKPVYLSIKADKQLYVGNDQVNKDALINVLMQQTQGNKDTTIFFQADKSVDYETLMSVMDELRTAGYLKIGLMGMETVKK----MSEQQPQSADVALELNNELKTRREKLSVLRENGVAFPNDFRRDTTSDRLHASYDEKSNEELEDLGIEVSVAGRMMTRRIMGKASFITLQDVGGRIQLYVARDDLPEGIYNEQFKKWDLGDILGARGKLFKTKTGELSVHCSELRLLTKALRPLPDKFHGLADQETRYRQRYLDLIANDESRNTFKIRSQIMAGIRQFMVARDFMEVETPMMQVIPGGASARPFITHHNALDIDMYLRIAPELYLKRLVVGGFDRV…					-MANQSNTGWFRMFQRGQHYMKTWPNDKRLAPVFPENRVSTATRFAIRFMPPLAVFTLTWQIAMGGQLGPAVATALFACSLPMQGLWWLGKRSVTPLPPTLLRWFHDVRTKLEAAGQAIAPVEGTPTYQALADLLKRAFKQLDRTFLDDLMSILIDKNTKVICQGFTGGQGTFHSEQALAYGTQLVGGVTPGKGGTTHLGLPVFNTVREAVEATGATATVIYVPAPFCKDGILEAIDAGIKLIITITEGIPTLDM					-------------MQQCVKDLEEALGALRQQIEAQPLLIARVFSLPPIEKGHEHDAITQIAVEQHLGTEARERALNHYCRLFMQHQSEKLSTKAAVRLPGALCIECSEQDAQQLTAFINSINQLKARLEHMITVESGLPSEARFEFVHQHLRGLITLNAYRTITALPAPESVRFGWANKQVIKNVKRDEIIAQLEKSLKAGRAQAPWTREQWAEKVQQELADVRALPASARLKIKRPVKVQPVARIWRAEEKKQT					VNQTKRIEILSRLQQANPHPTTELQFTSPFELLIAVLLSAQATDVSVNKATAKLYPVANTPAAMLALGVDGVKEYIKTIGLFNSKAENVIKTCRILLDQHGGQVPEDRAALEALPGVGRKTANVVLNTAFGWPTIAVDTHIFRVCNRTNFAPGKNVEQVEEKLLKVVPKAFKVDCHHWLILHGRYTCVARKPRCGSCLIEDLCEYPDKVE--MNKVLLYCRAGFEKECAAEISAKAAERNVYGFPRVKEDAGYVLFECYQQSDAERLIRELPFDQLIFARQMLVVGELLRDLPQDDRISPIVGMLSGVVEKGGELRVEVPDTNEAKELTRFCRKFTVPLRASLRESKILLNYESPKRPVVHVFFIAPGTCYVGYSLPENSSPFYMGIPRLKFPSDAPSR…					MAKIVKVIGREIIDSRGNPTVEAEVHLEGGFVGLAAAPSGASTGSREALELRDGDKSRFLGKGVTKAVAAVNGPIAEAVKGKDAKDQANIDKIMIDLDGTENKSNFGANAILAVSLAAAKAAAASKGQALYEHIAELNGTPGKYSMPLPMMNIINGGEHADNNVDIQEFMIQPVGASSVKEAIRMGSEVFHNLAKVLKSKGMSTAVGDEGGYAPNLGSNAEALAVIAEAVKAAGYELGKDITLAMDCAASEFY--KDGKYVLAGEGGKAFTSEEFTHFLEDLTKQYPIVSIEDGLDESDWDGFAYQTKVLGDKIQLVGDDLFVTNTKILKEGIEKGIANSILIKFNQIGSLTETLAAIKMAKDAGYTAVISHRSGETEDATIADLAVGTAAGQIKTGSM…					MAAFLIAILVLLFAACVLFLAAGWRPRASHIVTRDSLNKDFYHQRLVELTQDEDQGVIAERDVMARELQQSLLSDIPPT-PDAQSR-SSRRWVLLPGIIVLLVVPLVCYLNTGGFVPFSGWLQVQKAYPALRAQVLDPHAKPLTPEQLSRLQLGLRSHLQTEPDNLSDWAMLGRLGMVLNNATTARQAFEHALQLAPNNQVLKQDYAEVLARSGDPQENRQAELVLQDLRKQDPHNARTLSLLAYAAFEQQHYAQAIAAWQTLLNALPADDPRRDNIARSIEQARTDAGQQASQLTVDVTLSPQAENMLPPGGVMYISVTDGMSPVPVAVKRLAAGHFPVSLTLDDSNAMMQGRRLSAQKQIQVRVRISRNGRANPEPGDWFGVSAVVPWDGHQHVTVE…
>P_cypripedii					>P_cypripedii					>P_cypripedii					>P_cypripedii					>P_cypripedii					>P_cypripedii					>P_cypripedii					>P_cypripedii					>P_cypripedii					>P_cypripedii
MTKSELIERLAGQHTHIPAKVVEDAVKEMLEHMATTLAQGERIEIRGFGSFSLHYRAPRTGRNPKTGDKVDLEGKYVPHFKPGKELRDRANIYG--------MRASRLFTILLLNVLGVVIFFSWYLPPEHGFWFGLDKAIFFGFNDQMVVHHGFAVLVAITNFRGFDLVSLLAMGSLYMWFWRRETPQGRRRMLAIGITMLLTAVILNQLGHLIPVQHASPTLFFAHVHRVSELTGIPAKDASSDSFPGDHGMMLMIFACFMWRYFGCRAFLMGLLIVVVFGLPRVMAGAHWFTDIAVGSLSVVLVGLSWWLLTPASDKLVNWLYRSLPGKHKPQA---MPELPEVETSRRGIEPHMVGETILHAIVRNSRLRWPVSSEIHALSDQPVLSVQRRAKYL…					MQTQGIKKIVLAYSGGLDTSAIIPWLKENYGGCEVVAFVANIGQDPADLDGVEKKALQSGASECHVVDLREEFISEYVYPVLQTGALYEGTYLLGTSMARPIIAKAQVELALKVGADALCHGATGKGNDQVRFETTYTALAPQLKVVAPWREWNLRSREALLDYLKERNIPTTASLEKIYSRDENAWHISTEGGVLESPWNAPNKDCWVWTVDPLEAPDQPENVTVTVEKGRVVAVNGEKLSPFACLEKLNVLGAKHGVGRIDIVENRLVGIKSRGCYETPGGTIMVNALRAVEQLVLDRDSFKWREQLGQEMSYVVYDGRWFAPLRQSIQAAAESLAELVNGEVVLQLYKGQATAIQKKSANSLYSEEFATFGEDEVYDHRHAGGFIRLFSLSSRIRA…					MRLVQLSRDSLHFPPPEMALREPNGLLAMGGDLSPARLMNAYQRGIFPWFSPGDPILWWSPDPRAVMLPESFHLSRSMARFHRSSPYRVTMNQAFAQVLEGCASHRQEGTWITFEVKRAWLRLYELGHAHSVEVWQDQRLVGGLYGLALGQIFCGESMFSREENASKTALWVFSQHFLGHNGRLIDCQVLNPHTASLGAVEIPRVDYLQYVQTLAWQPVLPGCWQTQTLF--MSMATSSAGKIQVRNLNFHYGKFHALKNINLDIAKNQVTAFIGPSGCGKSTLLRTFNKMYSLYPEQRAEGEILLDGDNILASSQDIALLRARVGMVFQKPTPFPMSIYDNIAFGVRLFEKLSRADMDERVQWALSKAALWNETKDKLHQSGYSLSGGQQQRLCIARG…					MELKATSMGKRLAQHPYNRVRLLAAGVEVSGDRHEYLIPFNQLLDIVCKRGLVWGELEFLLPEDKVVRLHGTEWQETQRFFHYLQQAWQRWSQEMSEVCVEVLTHLQQEIFAFTGQDRWLKRSELNAVKENITRQFSALPLPTSRLEKFENCRELWQFCQQWLEQGDAAIRQRNREWTAKILQEYQEFFSTVETTPLNPSQCEAVVNGEDALLVLAGAGSGKTSVLVARAGWLLKRKLAQPEQILLLAFGRQATDEMNDRIQARLGESAIQARTFHALALHIIREGSNKQPVISKLESDSKVRRQLLIEAWREQCNGKKAQASGWRQWLQDELEWDIAEGPFWQDDKLAQRLASRLERWLGLMRMHGGAQAAMIADVPEEQRDQFSKRIKLMAPILKAW…					MAMRLNDDLESDGEMHEINVTPFIDVMLVLLIIFMVAAPLATVDVRVNLPASTSAPQPRPEKPVYLSIKEDNQVYIGNDQVTKETLVNALTAQTEGNKDTTIFFQADKSVSYETLMSVMDQLREAGYLKIGLMGMETVKK----MSEQQPQSADAALELNNELKTRREKLSALRETGVAFPNDFRRDTTSDKLHASYDEKSNEELEDLGIEVSVAGRMMTRRIMGKASFVTLQDVGGRIQLYVARDDLAEGIYNEQFKKWDLGDILGARGKLFKTKTGELSIHCSELRLLTKALRPLPDKFHGLADQETRYRQRYLDLIANDESRHTFQVRSKIMAGIRQFMVGRDFMEVETPMMQVIPGGASARPFITHHNALDIDMYLRIAPELYLKRLVVGGFDRV…					MANDTGNPGWFGLFQRGQHYMKTWPADKRLAPVFPENRVVTATRFSIRFMPPLAIFTLTWQIAMGGQLGPAVATALFACSLPMQGLWWLGKRSMTPLPPSLLQWFHEVRAKLEEAGQAIAPVEGKPTYQALADVLKRAFKQLDRTFLDDLMSILIDKNTKVICQGFTGGQGTFHSEQALAYGTQLVGGVTPGKGGTTHLGLPVFNTVREAVEATGATATVIYVPAPFCKDGILEAIDAGIKLIITITEGIPTLDMLTVKVKLDEAGVRMIGPNCPGVITPGECKIGIMPGHIHLPGRVGIVSRSGTLTYEAVKQTTDIGYGQSTCVGIGGDPIPGSNFIDILKMFQEDPQTEAIVMIGEIGGSAEEEAAAYIKEHVTKPVVGYIAGVTAPKGKRMGHAG…					----MARYDLISDLHACVNALEQNLAALRQQVEQQPLLIARVFSLPDIEKGHEHDEISRIKVTQHLGDVAREMALAHYCRLFMQHQSEKLSTKAAVRLPGAICIEADEASSDTITRLVAEINALKLRLEQLITVESGLPAEARFEFVHQHLRGLITLNAYRNVTLLDAPDSLRFGWANKNIIKNVKREEIIEQLERSLKANRAQAPWTREQWAEKVQQELETVRDLPLNARLKIKRPVKVQPVARVWRAEEKKQT					VNQDKRVQILTRLRDENPHPTTELNFTSPFELLIAVLLSAQATDVSVNKATAKLYPVANTPAAILALGVDGVKEYIKTIGLFNSKAENVIKTCRILLEQHGGAVPEDRAALEALPGVGRKTANVVLNTAFGWPTIAVDTHIFRVSNRTRFAPGKNVEEVEEKLLKVVPKAFKVDCHHWLILHGRYTCVARKPRCGSCLIEDLCEFDAKTE--MNKVLLYCRPGFEKECAAEISAKAAEREIYGFPRVKDDAGYVLFECYQQEDAEKLISQLPFAELIFARQMVVVGELLRDLPPDDRISPIVGMLMGVVEKGGELRVEVPDTNEAKELTKFCRKFTVPLRASLRENRILLNYESPKRPVVHVFFIAPGTCYVGYSLPQNNSPFYMGIPRLKFPSDAPSR…					MSKIVKVIGREIIDSRGNPTVEAEVHLEGGFVGLAAAPSGASTGSREALELRDGDKSRFLGKGVTKAVAAVNGPIADAVKGKDAKDQANIDKIMIELDGTENKSNFGANAILAVSLAAAKAAAASKGQPLYEHIAELNGTPGKYSMPLPMMNIINGGEHADNNVDIQEFMIQPVGAKTVKEAIRMGSEVFHHLAKVLKSKGMNTAVGDEGGYAPNLGSNAEALAVIAEAVKAAGYELGKDITLAMDCAASEFY--KDGKYVLAGEGGKAFTSEEFTHFLEDLTKQYPIVSIEDGLDESDWAGFAYQTKVLGDKIQLVGDDLFVTNTKILREGIDKGIANSILIKFNQIGSLTETLAAIKMAKDAGYTAVISHRSGETEDATIADLAVGTAAGQIKTGSM…					MSGFWITLIILLAAACALFLSAGWRQRVASNGDRDRLNTDFYQQRLRELERDEEEGVVAERPEMVRELQQTLLTDVPQPGEAARNQ-QSSRWILLPGVGLLVVVSLGMYLKTGGLAQLAGWTSVQEEYPALRARVMDPQAKPLTMEELARLQLGLRTSLQSDPQNLNDWTMLGRLGMVLNNASDASQAFERALQLAPNNLELQQDYAEVLTRSSDPQDNRQASVLLRDLLKRDHSNVRTLSLLAFNAFEQQQYDEAIGAWQMMLKLLPAGDKRIAMIERSIEQAKTDAGQQNTHLALTVSLNPQAEKMLPQGGVMYISVTDGVSPVPVAVKRFPLSHFPLSLTLDDSNAMMPDRLLSAQHQVQIRVRISRDGSANPQSGDWFGLSAVTPWDGHQQLAVE…
>P_vagans					>P_vagans					>P_vagans					>P_vagans					>P_vagans					>P_vagans					>P_vagans					>P_vagans					>P_vagans					>P_vagans
MTKSELIERLAGQHTHIPAKVVEDAVKEMLEHMATTLAQGERIEIRGFGSFSLHYRAPRTGRNPKTGDKVDLEGKYVPHFKPGKELRDRANIYG--------MRATRLITILLLNALGVVLFLSWYLPPEHGFWFGIDKTIFYGFNNQMVSHPLFALIVAITNFRGFDAVSLLAMGLLYLSIWRRETPQARRRMLAIGITMLLTAVVLNQLGHLLPVKHSSPTLFFENVHRVSELTGIPAKDASKDSFPGDHGMMLIIFACFIWRYFGFSRFLIATAIVVIFSLPRVMAGAHWFTDIAVGSMSVILVGLSWWLLTPASDVLVNWFYRKLPGKYKPVT---MPELPEVETSRRGIEPHLVGETILHAVVRNSRLRWPVSQEILALSDQPVLSVQRRAKYL…					MQTQNIKKIVLAYSGGLDTSAIIPWLKENYGGCEVVAFVADIGQERGDLEGVEKKALQSGASECHVVDLREEFISDYVYPVLQTGALYEGTYLLGTSMARPIIAKAQVELALKVGADALCHGATGKGNDQVRFETTYTALAPQLKVVAPWREWNLRSREALLDYLKERNIPTTASLEKIYSRDENAWHISTEGGVLESPANAPNKDCWVWTVDPLEAPDQPEEVTVTVEKGRVVSVNGEKLSPFQCLEKLNVLGAKHGVGRIDIVENRLVGIKSRGCYETPGGTIMVNALRAVEQLVLDRDSFKWREQLGHEMSYVVYDGRWFAPLRKSIQAAAESLAEEVNGEVVLQLYKGQATATQKRSANSLYSEEFATFGEDEVYDHRHAGGFIRLFSLSSRIRA…					MRLVQLSRESLLFPPPEMALREPNGLLAMGGDLSPARLLNAYKHGIFPWFSPGDPILWWSPDPRAVLLPEQFHLSRSMKRFHNRSPYRVTMNESFAEVLEGCASGREEGTWITFEMKRAWLRLYELGHAHSIEVWDEHQLVGGMYGLAMGQIFCGESMFSRQQNASKTALWVFCQHFIRHQGRLVDCQVLNPHTASLGAQEIPRADYLQYVQRLADQPVSDGCWQTQTLF--MSIATATADKIQVRNLNFYYGKFHALKNINLDIAKNQVTAFIGPSGCGKSTLLRTFNKMYSLYPEQRAEGDILLDGENILATQQDIALLRARVGMVFQKPTPFPMSIYDNIAFGVRLFEKLSRADMDERVQWALTKAALWNETKDKLHQSGYSLSGGQQQRLCIARG…					VELKATSMGKRLAQHPYNRVRLLAAGVEVSGDKHEYLIPFNQLLDIACKRGLVWGELEFLLADEKVVRLHGTEWQETQRFHHYLLQAWQNWSLEMSAVCREVLQSLRDEIGTFSAQDRWLNRHELQALKTKILKQFDALPMPFTRLNDFPDCRDNLAFCQRWLDQGESALRQRNRDWTAAMLTRYQSFFASVESTPLNQSQCEAVVNGEDSLLVLAGAGSGKTSVLVARAGWLMERRLASADQILLLAFGRQAAEEMNARIQSRLSAGDIQARTFHSLALHIIREGSNKQPVISKLESDADARRTLLLREWRQQCHEKKAMANGWRQWLRDELEWEVPEGPFWEDERLANRLASRLERWLGLMRMHGGAQAAMIADVPEEIRDHFSKRIKLMAPLLKAW…					MAMRLNDDLETDGEMHEINVTPFIDVMLVLLIIFMVAAPLATVDVRVNLPASTSAPQPRPEKPVYLSIKADKQLYVGNDQVTPDSLVNVLTSQTQGNKETTIFFQADKSVDYETLMSVMDKLRTAGYLKIGLMGMETVKK----MSEQQPQSADAAVELNNELKTRREKLSALRANGLAFPNDFRRDSLSNQLLESYGEKSNEELEALGIEVSVAGRMMTRRIMGKASFVTLQDVGGRIQLYVSRDDLAEGIYNEQFKKWDLGDILGARGKLFRTKTGELSIHCSELRLLTKALRPLPDKFHGLADQETRYRQRYLDLIANEESRNTFKIRSQIMAGIRQFMVGRDFMEVETPMMQVIPGGASARPFITHHNALDIDMYLRIAPELYLKRLVVGGFDRV…					MANESGSTSWFRMFQRGQHYMKTWPADKRLAPVFPENRVSSATRFAIRFMPPLAIFTLTWQIAMGGQLGPAVATALFACSLPMQGLWWLGKRSVTPLPPTLLNWFHEVRARLEEAGQAIAPVEGKPTYQALADLLKRAFKQLDRTFLDDLMSILIDKNTKVICQGFTGGQGTFHSEQALAYGTQLVGGVTPGKGGTTHLGLPVFNTVREAVEATGATATVIYVPAPFCKDGILEAIEAGIKLIITITEGIPTLDMLTVKVKLDEAGVRMIGPNCPGVITPGECKIGIMPGHIHQPGRVGIVSRSGTLTYEAVKQTTDIGYGQSTCVGIGGDPIPGSNFIDILKMFQDDPQTEAIVMIGEIGGSAEEEAAAFIKEHVTKPVVGYIAGVTAPKGKRMGHAG…					----MTRYDLVADMHQCVNDLELALGELRQQIEAQPLLIARVFSLPPVVKGREHEAITQIAVEQHLGDSALKMALDHYCRLFMQHQSEQLSTKAAVRLPGALCIECDEQREAEIGSLVDLINQLKARLEQLITVDSGLPSEARFEFVHQHLRGLITLNAYRTITLLSAPDSLRFGWANKHIIKNLKREEVIAQLEKSLKAGRAQAPWSREQWAEKVQEELASVRALPASARLKIKRPVKVQPVARVWRADEKKQT					VNQTKRTEILHRLQQNNPHPTTELNFSSPFELLIAVLLSAQATDVSVNKATAKLYPVANTPAAMLALGVDGVKEYIKTIGLFNSKAENVIKTCRILLEQHNGEVPEDRAALEALPGVGRKTANVVLNTAFGWPTIAVDTHIFRVSNRTKFAPGKNVEEVEQKLLKVVPAAYKVDCHHWLILHGRYTCVARKPRCGSCLIEDLCEYPDKVE--MNKVLLYCRPGFEKECAAEISAKAAESEIYGFPRVKDDSGYVLFECYQFEDAERLARELPFDELIFARQMLVVGEMLRDLPQEDRITPIVGMLTGVVEKGGELRVEVPDTNEAKELTKFCRKFTVPLRSALRESKILLNYESPKRPVVHVFFIAPGTCYVGYSIRENSSPFYMGIPRLKFPSDAPSR…					MSKIVKVIGREIIDSRGNPTVEAEVHLEGGFVGLAAAPSGASTGSREALELRDGDKSRFLGKGVTKAVAAVNGPIAEAVKGKDAKDQANIDKIMIDLDGTENKSNFGANAILAVSLAAAKAAAASKGQALYEHIAELNGTPGKYSMPLPMMNIINGGEHADNNVDIQEFMIQPVGASNVKEAIRMGSEVFHNLAKVLKSKGMSTAVGDEGGYAPNLGSNAEALAVIAEAVKAAGYELGKDITLAMDCAASEFY--KDGKYVLAGEGGKAFTSEEFTHFLEDLTKQYPIVSIEDGLDESDWDGFAYQTKVLGDKIQLVGDDLFVTNTKILKEGIDKGIANSILIKFNQIGSLTETLAAIKMAKDAGYTAVISHRSGETEDATIADLAVGTAAGQIKTGSM…					MSAFWITLFLLLLAACTLFLAAGWRQRQASAGDRDRLNQRFYHQRIEELAQDEAQGVVAERPLMERELQQTLLADIPPA-QTLQSH-SSNRWILLPGLIVLVAVSLGTYLKTGGLAQFTGWMQVQQAYPELRARLMDPGAKPLSMEELARLQLGLRTALQTEPDNLADWTMLGRLGMVLNNAEMASQAFERALQLSPNDLALKQDYAEVLTRSSDPQDNRQASLLLQSLLKVDPQNLRTLSLLAYNAYGQQHYDQAINAWQTLLGLLPAGDSRHAMIARSIEKARSDAGQQSRQLALTVTLTPEAEKMLPQDGVLYISVSDGDSPVPVAVKRIPLSHFPLSLTLDDSNAMMPDRLLSAQHQVEVRVRVSRDGSANPQPGDWLGLSAVTPWDGHQPIAVE…
>P_ananatis					>P_ananatis					>P_ananatis					>P_ananatis					>P_ananatis					>P_ananatis					>P_ananatis					>P_ananatis					>P_ananatis					>P_ananatis
MTKSELIERLAGQHTHIPAKVVEDAVKEMLEHMATTLAQGERIEIRGFGSFSLHYRAPRTGRNPKTGDKVDLEGKYVPHFKPGKELRDRANIYG--------MHATRLVTILLLNALGLVLFFSWYLPPHHGFWFDIDKGIFFAFNNEIVDHPGFALLVAITNFRGFDAVSLLAMGLLYLWLWRRETPAGRRRMFAIGITMLLTAVVLNQAGHLIPEKHASPTLFFENVHRVSELTGIPAKDASSDSFPGDHGMMLIIFAAFMWRYFGFRTFLVGVVIVGLFSLPRVMAGAHWFSDIAVGSLSVALVGLSWWLLTPASDYLVNWFYHKLPGKNKP-----MPELPEVETSRRGIEPHLVGQTILHAVVRNARLRWPVSQEILALSDQPVLSVQRRAKYL…					MQTQNIKKIVLAYSGGLDTSAIIPWLKENYGGCEVVAFVADIGQERSDLEGVEKKALQSGASECHVVDLREEFISDYVYPVLQTGALYEGTYLLGTSMARPIIAKAQVELALKVGADALCHGATGKGNDQVRFETTYTALAPQLKVVAPWREWNLRSREALLDYLKERNIPTTASLEKIYSRDENAWHISTEGGVLESPSNAPNKDCWVWTVDPLEAPDQPEDVTVTVEKGRVVAVNGEKLSPFQCLEKLNVLGAKHGVGRIDIVENRLVGIKSRGCYETPGGTIMVNALRAVEQLVLDRDSFKWREQLGHEMSYVVYDGRWFAPLRKSIQAAAESLAEEVNGEVVLQLYKGQATATQKRSANSLYSEEFATFGEDEVYDHRHAGGFIRLFSLSSRIRA…					MRLVQLSRESLLFPPPETALREPNGLLAMGGDLSPARLLNAYQQGIFPWFSPGDPILWWSPDPRAVLLPDRFHLSRSMKRFHQQSPYRVTMNEAFSDVVEGCAAGREEGTWITFEVKRAWLKLYELGHAHSIEVWREQDLVGGMYGLALGQIFCGESMFSLQTNASKTAFWVFCQHFIKHKGRLVDCQILNPHTASLGAVDIPREAYLDAVKNLSSQPVDSGCWRNQTLF--MSTATASAGKIEVRNLNFYYGKFHALKNINLDIAKNQVTAFIGPSGCGKSTLLRTFNKMYSLYPDQRAEGDILLDGDNILASHQDIALLRARVGMVFQKPTPFPMSIYDNIAFGVRLFEKLSRADMDERVQWALTKAALWNETKDKLHQSGYSLSGGQQQRLCIARG…					VELKATSMGKRLAQHPYNRVRLLTAGVEVSGDKHEYLIPFNQLSDITCKRGMVWGELEFLLADNKVVRLHGTEWQETQRFYHYLMQAWQDWSHEMSDVCASVLQGLRAEINGFSEQDRWLKRSELQAINDQILKQFDALPLPLSRINDFESCRENWAFCQHWLQQGEAAIRQRNRDWTAAMLTRYQDFFATVESTPLNGSQAEAVVNGEDAVLVLAGAGSGKTSVLVARAGWLLQRRLASADQILLLAFGRHAAEEMNDRIQSRLQATDMQARTFHSLALHIIREGSNKQPVISKLESDAAARRALLIDNWRQQCHEKKAQANGWRQWLRDELAWEVGEGPFWQDDRLAERLAPRLERWLSLMRMHGGAQAAMIDGVPEALRELFSKRIKLMAPLLKAW…					MAMRLNDQAETDGEMHEINVTPFIDVMLVLLIIFMVAAPLATVDVRVNLPASTSAPQPRPEKPVYLSIKADKQLYVGNEVVNKASLINVLTQQTEGNKDTTIFFQADKSVDYETLMSVMDELRTAGYLKIGLMGMETVKK----MSEQQPQSADVALELNNELKTRREKLSVLRENGVAFPNDFRRDTTSDRLHASYDEKSNEELEDLGIEVSVAGRMMTRRIMGKASFITLQDVGGRIQLYVARDDLAEGIYNEQFKKWDLGDILGARGKLFKTKTGELSIHCSELRLLTKALRPLPDKFHGLADQETRYRQRYLDLIANDESRNTFKIRSQIMAGIRQFMVGRDFMEVETPMMQVIPGGASARPFITHHNALDIDMYLRIAPELYLKRLVVGGFDRV…					-MANESHTGWFRMFQRGQHYMKTWPNDKRLAPVFPENRVSTATRFAIRFMPPLAVFTLTWQIAMGGQLGPAVATALFACSLPMQGLWWLGKRSVTPLPPTLLRWFHEVRTKLEAAGQAIAPVEGKPTYQALADLLKRAFKQLDRTFLDDLMSILIDKNTKVICQGFTGGQGTFHSEQALAYGTQLVGGVTPGKGGTTHLGLPVFNTVREAVEATGATATVIYVPAPFCKDGILEAIDAGIKLIITITEGIPTLDM					----MARYDLVTDMQQCVKDLEQALGALRQQIESLPLLIARVFRLPPVEKGHEHDPVTQLAVEQLLGIQARDMAMNHYCRLFMQHQSEKLSTKAAVRLPGALCLACSEQEETELTERIAGINHLKARLEHLITVESGLPSEARFEFVHQHLRGLITLNAYRTITAIPAPESVRFGWANKQVIKNVKREEIVAQLERSLKAGRAQAPWTREQWAEKVQQELADVRALPASARLKIKRPVKVQPIARIWRAEEKKQT					VNQTKRTEILSRLQQANPHPTTELQFSSPFELLIAVLLSAQATDVSVNKATAKLYPVANTPAAMLALGVDGVKEYIKTIGLFNSKAENVIKTCRILLEQHGGVVPEDRAALEALPGVGRKTANVVLNTAFGWPTIAVDTHIFRVCNRTNFAPGKNVEQVEEKLLKVVPKAFKVDCHHWLILHGRYTCVARKPRCGACLIEDLCEYPDKVE--MNKVLLYCRSGFEKECAAEISAKAAERNVYGFPRVKEEAGYVLFECYQQPDAERLIRELPFETLIFARQMLVVGELLRDLPQDDRISPIVGMLSGVVEKGGELRVEVPDTNEAKELTKFCRKFTVPLRASLRESKILLNYESPKRPVVHVFFIAPGTCYVGYSLPENNSPFYMGIPRLKFPSDAPSR…					MAKIVKVIGREIIDSRGNPTVEAEVHLEGGFVGLAAAPSGASTGSREALELRDGDKSRFLGKGVTKAVAAVNGPIAEAVKGKDAKDQANIDKIMIDLDGTENKSNFGANAILAVSLAAAKAAAASKGQALYEHIAELNGTPGKYSMPLPMMNIINGGEHADNNVDIQEFMIQPVGASNVKEAIRMGSEVFHNLAKVLKSKGMSTAVGDEGGYAPNLGSNAEALAVIAEAVKAAGYELGKDITLAMDCAASEFY--KDGKYVLAGEGGKAFTSEEFTHFLEDLTKQYPIVSIEDGLDESDWDGFAYQTKVLGDKIQLVGDDLFVTNTKILKEGIEKGIANSILIKFNQIGSLTETLAAIKMAKDAGYTAVISHRSGETEDATIADLAVGTAAGQIKTGSM…					MAVFLLTIFLLLLAASVLFLAAGWRQRETHAAARDNLNTHFYRQRLAEITLDEEQGVIADRAVMEQELQQTLLSDIPPA-SDAHSH-RSRRWVLLPGLIVLVIVSLASYLKTGGLTQLSGWLQVQEAYPALRAQLMDPHARPLTQEQLSRLQLGLRSQLQTEPDNLSGWAMLGRLGMVLNNATGARQAFEHALQLAPNNFALQQDYAEVLTRSGDPQDNRLAGLLLTDLLKQHPQDIRTLSLLAYNAFEQQQYSQAIDSWQTLLQVLPADDPRREGIARSIEQAKTDAGQQSSQLTVEVTLSPQAEKMLPPGGVMYISVTDGVSPVPVAVKRVSPGHFPVSLTLDDSNAMLQDRRLSTQKQIQVRVRIARNGRANPEPGDWFGVSAVVPWDGHQHIDVA…
>P_anthophila					>P_anthophila					>P_anthophila					>P_anthophila					>P_anthophila					>P_anthophila					>P_anthophila					>P_anthophila					>P_anthophila					>P_anthophila
MTKSELIERLAGQHTHIPAKVVEDAVKEMLEHMATTLAQGERIEIRGFGSFSLHYRAPRTGRNPKTGDKVDLEGKYVPHFKPGKELRDRANIYG--------MRAIRLITILLLNALGVVLFLSWYLPPQHGFWFGIDKSIFYGFNNQMVTHPLFALIVAITNFRGFDVVSLLAMGLLYLSIWRHEAPQARRRMLAIGITMLLTAVVLNQLGHLLPVKHSSPTLFFENVHRVSELTGIPAKDASKDSFPGDHGMMLIIFACFIWRYFGFRRFLIALAIVVLFSLPRVMAGAHWFTDIAVGSLSVVLVGLSWWLLTPASDALVNWFYRKLPGKYKPVM---MPELPEVETSRRGIEPHLVGETILHAVVRNSRLRWPVSQEIHALSDQPVLSVQRRAKYL…					MQTQNIKKIVLAYSGGLDTSAIIPWLKENYGGCEVVAFVADIGQERGDLEGVEKKALQSGASECHVVDLREEFISDYVYPVLQTGALYEGTYLLGTSMARPIIAKAQVELALKVGADALCHGATGKGNDQVRFETTYTALAPQLKVVAPWREWNLRSREALLDYLKERNIPTTASLEKIYSRDENAWHISTEGGVLESPANAPNKDCWVWTVDPLEAPDQPEEVTVTVEKGRVVAVNGEKLSPFQCLEKLNVLGAKHGVGRIDIVENRLVGIKSRGCYETPGGTIMVSALRAVEQLVLDRDSFKWREQLGHEMSYVVYDGRWFAPLRKSIQAAAESLAEEVNGEVVVQLYKGHATATQKRSANSLYSEEFATFGEDEVYDHRHAGGFIRLFSLSSRIRA…					MRLIQLSRESLQFPPPEMALREPNGLLAMGGDLSPARLLNAYQRGIFPWFSSGDPILWWSPDPRAVLLPEQFHLSRSMKRFHNQSPYRVTMNEAFAEVIEGCASGREEGTWITFEMKRAWLRLYELGHAHSIEVWDAHQLVGGMYGLAMGQIFCGESMFSRQQNASKTALLVFCQHFIRHQGRLVDCQVLNPHTASLGAQEIPRSDYLHYVQNFASQPVSEGCWQTQTLF--MSIATASADKIQVRNLNFYYGKFHALKNINLDIAKNQVTAFIGPSGCGKSTLLRTFNKMYSLYPEQRAEGDILLDGENILTAQQDIALLRARVGMVFQKPTPFPMSIYDNIAFGVRLFEKLSRADMDERVQWALTKAALWNETKDKLHQSGYSLSGGQQQRLCIARG…					VELKATSMGKRLARHPYNRVRLMAAGVEVSGDKHEYLIPFNQLLDIACKRGVVWGELEFLLADEKVVRLHGTEWQETQRFYHYLLQAWQSWSLEMSAVCRDVLQTLRDDIEAFSAQDRWLNRHELQALKNTIIQQFDALPLPLSRLKDFADCRENQAFCERWLEQGEAALRQRNRDWTAAMLTRYRAFFDTVESTPLNQSQCEAVVNGEDSLLVLAGAGSGKTSVLVARAGWLMQRNLASADQILLLAFGRQAAEEMNARIQSRLSASDIQARTFHSLALHIIREGSNKQPVISKLESDADSRRALLIQEWQQQCHEKKAQANGWRQWLRDELEWEVPEGPFWEDDKLAKRLASRLERWLGLMRMHGGAQAAMIAEVPEDVRDLFSKRIRLMAPLLKAW…					MAMRLNDDLQTDGEMHEINVTPFIDVMLVLLIIFMVAAPLATVDVRVNLPASTSAPQPRPEKPVYLSIKADKQLYVGNDAVTPDSLVNVLTSQTQGNKETTIFFQADKSVDYETLMSVMDKLRTAGYLKIGLMGMETVKK----MSEQQPQSADAAVELNNELKTRREKLSVLRANGVAFPNDFRRDSLSDQLHASYGEKSNEELEDLGIEVSVAGRMMTRRIMGKASFVTLQDVGGRIQLYVSRDDLAEGIYNEQFKKWDLGDILGARGKLFKTKTGELSIHCSELRLLTKALRPLPDKFHGLADQETRYRQRYLDLIANDESRNTFRIRSQIMAGIRQFMVSRDFMEVETPMMQVIPGGASARPFITHHNALDIDMYLRIAPELYLKRLVVGGFDRV…					MANESGSTNWFQMFQRGQHYMKTWPADKRLAPVFPENRVSSVTRFAIRFMPPLAIFTLTWQIAMGGQLGPAVATALFACSLPMQGLWWLGKRSVTPLPPTLLSWFHEVRARLEEAGQAIAPVEGKPTYQALADLLKRAFKQLDRTFLDDLMSILIDKNTKVICQGFTGGQGTFHSEQALAYGTQLVGGVTPGKGGTTHLGLPVFNTVREAVEATGATATVIYVPAPFCKDGILEAIEAGIKLIITITEGIPTLDMLTVKVKLDEAGVRMIGPNCPGVITPGECKIGIMPGHIHQPGRVGIVSRSGTLTYEAVKQTTDIGYGQSTCVGIGGDPIPGSNFIDILKLFQDDPQTEAIVMIGEIGGSAEEEAAAFIKEHVTKPVVGYIAGVTAPKGKRMGHAG…					----MTRYDLVADMHQCVNDLEQALGELREQIEAQPLLIARVFSLPPVVKGREHDAITRIAVEQHLGDSARKMALDHYCRLFMQHQSEQLSTKAAVRLPGALCIECDAEREAEIGALVDLINQLKARLEQLITVESGLPSEARFEFVHQHLRGLITLNAYRTITLLSAPDSLRFGWANKHIIKNLKREEVIAQLEKSLKAGRAQAPWSREQWAEKVQEELASVRALPASARLKIKRPVKVQPVARVWRAEEKKQT					VNQTKRTEILRRLQEHNPHPTTELHFSSPFELLIAVLLSAQATDVSVNKATAKLYPVANTPAAMLALGVDGVKSYIKTIGLFNSKAENVIKTCRILLEQHNGEVPEDRAALEALPGVGRKTANVVLNTAFGWPTIAVDTHIFRVSNRTRFAPGKNVEEVEQKLLKVVPAAYKVDCHHWLILHGRYTCVARKPRCGSCLIEDLCEYPEKAD--MNKVLLYCRPGFEKECAAEISAKAAEREVYGFPRVKEDAGYVLFECYQFEDAERLVRELPFQELIFARQMLVVGELLRDLPQEDRITPIVGMLTGVVEKGGELRVEVPDTNEAKELTKFCRKFTVPLRAALRESKILLNYESPKRPVVHVFFIAPGTCYVGYSLPENSSPFYMGIPRLKFPSDAPSR…					MSKIVKVIGREIIDSRGNPTVEAEVHLEGGFVGLAAAPSGASTGSREALELRDGDKSRFLGKGVTKAVAAVNGPIAEAVKGKDAKDQANIDKIMIDLDGTENKSNFGANAILAVSLAAAKAAAASKGQPLYEHIAELNGTPGKYSMPLPMMNIINGGEHADNNVDIQEFMIQPVGAANVKEAIRMGSEVFHNLAKVLKSKGMSTAVGDEGGYAPNLGSNAEALAVIAEAVKAAGYELGKDITLAMDCAASEFY--KDGKYVLAGEGGKAFTSEEFTHFLEDLTKQYPIVSIEDGLDESDWNGFAYQTKVLGDKIQLVGDDLFVTNTKILKEGIEKGIANSILIKFNQIGSLTETLAAIKMAKDAGYTAVISHRSGETEDATIADLAVGTAAGQIKTGSM…					MSAFWITLFLLLLAACTLFLAAGWRQRQASPGDRDRLNQRFYHQRIDELAQDEEQGVVAERPVMERELQQTLLADIPPA-QSLPSH-SSSRWILLPGLLVLIGVSLGTYLKTGGLTQYTGWMQVQQAYPALRARLMDPGGRPLSMEELARLELGLRTALQTEPDNLADWTMLGRLGMVLNQADIASQAFEHALQLSPNDMTLKQDYAEVLTRSPDPQDNRQASLLLRALLKAEPQNPRTLGLLAFNAYGQQQYDQAIEAWQALLNVLPADDTRRAMIARSIEQARSDAGEQSRQLALTVRLTPQAEKMLPQDGVLYISVSDGTSPVPVAVKRMPLSHFPLSLTLDDSNAMMPDRLLSAQHQVAVRVRISRDGSATPQPGDWLGESAVTPWDGHQPITVE…
>P_conspicua					>P_conspicua					>P_conspicua					>P_conspicua					>P_conspicua					>P_conspicua					>P_conspicua					>P_conspicua					>P_conspicua					>P_conspicua
MTKSELIERLAGQHTHIPAKVVEDAVKEMLEHMATTLAQGERIEIRGFGSFSLHYRAPRTGRNPKTGDKVDLEGKYVPHFKPGKELRDRANIYG--------MRVTRLITILLLNALGVVLFLSWYLPPAHGFWFGIDKSIFFGFNSRMIIHSGFALLVAITNYRGFDAVSLLAMGLLYLSIWRSETPQARRRMLAIGITMLLTAVVLNQLGHLLPVKHSSPTLFFENVHRVSELTGIPAKDASKDSFPGDHGMMLMIFACFIWRYFGFSRFLIAAAIVVIFSLPRIMAGAHWFTDIAVGSLSVVLVGLSWWLLTPASDLLVNWFYRKLPGQYKPLA---MPELPEVETSRRGIEPHLVGETILHAVVRNSRLRWPVSQEILSLSDQPVLSVQRRAKYL…					MQTQGIKKIVLAYSGGLDTSAIIPWLKENYGGCEVVAFVADIGQERSDLEGVEKKALQSGASECHVVDLREEFISDYVYPVLQTGALYEGTYLLGTSMARPIIAKAQVELALKVGADALCHGATGKGNDQVRFETTYTALAPQLKVVAPWREWNLRSREALLDYLKERNIPTTASLEKIYSRDENAWHISTEGGVLESPANAPNKDCWVWTVDPLEAPDQPEEVTVTVEKGRVVAVNGEKLSPFQCLEKLNVIGAKHGVGRIDIVENRLVGIKSRGCYETPGGTIMVNALRAVEQLVLDRDSFKWREQLGQEMSYVVYDGRWFAPLRKSIQAAAESLAEEVNGEVVLQLYKGQATATQKRSPNSLYSEEFATFGEDEVYDHRHAGGFIRLFSLSSRIRA…					MRLVQLSRESLQFPPPEMALREPNGLLAMGGDLSPARLLNAYQHGIFPWFSPGDPILWWSPDPRAVLLPEHFHLSRSMKRFHQRSPYRVTMNEAFADVIDGCASGREEGTWITFEVKRAWLRLYESGHAHSIEVWNEQKLVGGMYGLALGQIFCGESMFSRQENASKTALLVFCQHFIKHQGRLLDCQVLNPHTASLGALEIPRTDYLQYVQSLAWQPVSDGCWRTQTLF--MSIATASADKIQVRNLNFYYGKFHALKNINLDIAKNQVTAFIGPSGCGKSTLLRTFNKMYSLYPDQRAEGDILLDGDNILAAQQDIALLRARVGMVFQKPTPFPMSIYDNIAFGVRLFEKLSRADMDERVQWALTKAALWNETKDKLHQSGYSLSGGQQQRLCIARG…					VELKATSMGKRLAQHPYNRVRLMAAGVEVSGDKHEYLIPFNQLLAITCKRGLVWGELEFLLADEKVVRLHGTEWQETQRFHHYLLQSWQQWSLEMSAVCGEVLQALRSDIEAFSTQDRWLNRSELQTLKTQIVKQFDALPLPLTRLGEFAQCRDDWEFCQRWLEQGETVLHQRNRDWTADILTRYHDFFARVESTPLNTSQCEAAVNGEASLLVLAGAGSGKTSVLVARAGWLMQRKLASADQILLLAFGRQAAEEMNHRIQSRLGASDIQARTFHSLALHIIREGSNKQPAISKLESDPQARRDLLIHHWRQQCSEKKAQANGWRQWLREELEWDLPEGAFWQDDKLANRLVTRLERWLSLMRMHGGAQAAMIGDVPDENRELFSKRIKLMAPLLKAW…					MAMRLNDDLETDGEMHEINVTPFIDVMLVLLIIFMVAAPLATVDVRVNLPASTSAPQPRPEKPVYLSIKADKQLYVGNDQVTPESLVSVLTGQTGGNKETTIFFQADKSVDYETLMSVMDQLRSAGYLKIGLMGMETVKK----MSEQQPQSADAALELNNELKTRREKLSALRENGVAFPNDFRRDTLSNQLHERYDEKSNEELEDLGIEVSVAGRMMTRRIMGKASFVTLQDVGGRIQLYVSRDDLAEGIYNEQFKKWDLGDILGARGKLFKTKTGELSIHCSELRLLTKALRPLPDKFHGLADQETRYRQRYLDLIANDESRKTFQIRSQIMAGIRQFMVSRDFMEVETPMMQVIPGGASARPFITHHNALDIDMYLRIAPELYLKRLVVGGFDRV…					MANESGSTSWFRMFQRGQHYMKTWPADKRLAPVFPENRVSSATRFAIRFMPPLAIFTLTWQIAMGGQLGPAVATALFACSLPMQGLWWLGKRSVTPLPPTLLNWFHEVRAKLEEAGQAIAPIEGKPTYQALADVLKRAFKQLDRTFLDDLMSILIDKNTKVICQGFTGGQGTFHSEQALAYGTQLVGGVTPGKGGTTHLGLPVFNTVREAVEATGATATVIYVPAPFCKDGILEAIDAGIKLIITITEGIPTLDMLTVKVKLDEAGVRMIGPNCPGVITPGECKIGIMPGHIHQPGRVGIVSRSGTLTYEAVKQTTDIGYGQSTCVGIGGDPIPGSNFIDILKMFQDDPQTEAIVMIGEIGGSAEEEAAAFIKEHVTKPVVGYIAGVTAPKGKRMGHAG…					----MARYDLVSDMHQCVNDLEQALGQLRQQIEAQPLLIARVFSLPPIVKGREHEAITQITVEQHLGQQALDLALNHYCRLFMQHQSEQLSTKAAVRLPGALCIECDEPREAEISAQVDAINQLKARLEQLITVDSGLPSEARFEFVHQHLRGLITLNAYRTITLLSAPDSLRFGWANKHIIKNMKREEVIAQLEKSLKAGRAQAPWSREQWAEKVQEELASVRALPASARLKIKRPVKVQPVARVWRADQKKQT					VNQTKRNEILRRLQQNNPHPTTELNFSSPFELLIAVLLSAQATDVSVNKATARLYPVANTPAAMLALGVEGVKEYIKTIGLFNSKAENVIKTCRILLEQHNGEVPEDRAALEALPGVGRKTANVVLNTAFGWPTIAVDTHIFRVCNRTRFAPGKNVEEVEQKLLKVVPAAYKVDCHHWLILHGRYTCVARKPRCGACLIEDLCEYPDKVD--MNKVLLYCRPGFEKECAAEISAKAAEREIYGFPRVKENSGYVLFECYQFEDAERLARELPFDDLIFARQMLVVGELLRDLPQEDRITPIVGMLTGVVEKGGELRVEVPDTNEAKELTKFCRKFTVPLRTALRESKILLNYESPKRPVVHVFFIAPGTCYVGYSLPENSSPFYMGIPRLKFPSDAPSR…					MSKIVKVIGREIIDSRGNPTVEAEVHLEGGFVGLAAAPSGASTGSREALELRDGDKSRFLGKGVTKAVAAVNGPIAEAVKGKDAKDQANIDKIMIDLDGTENKSNFGANAILAVSLAAAKAAAASKGQPLYEHIAELNGTPGKYSMPLPMMNIINGGEHADNNVDIQEFMIQPVGASSVKEAIRMGSEVFHNLAKVLKSKGMSTAVGDEGGYAPNLGSNAEALAVIAEAVKAAGYELGKDITLAMDCAASEFY--KDGKYVLAGEGGKAFTSEEFTHFLEDLTKQYPIVSIEDGLDESDWDGFAYQTKVLGDKIQLVGDDLFVTNTKILKEGIDKGIANSILIKFNQIGSLTETLAAIKMAKDAGYTAVISHRSGETEDATIADLAVGTAAGQIKTGSM…					MSAFWITLLLLLLAACALFLVAGWRQRQASAGDRDRLNQRFYHQRLSELAQDEEQGVVAERPVMERELQQTLLADIPPA-TALQPH-SSSRWILVPGLILLLVVSLGTYLKVGGLTQLIGWKQVEQAYPDLRARLMDPAAKPLSMEELARLQLGLRSALQAEPDNLNDWTMLGRLGMVLNNASVASQAFERALQLAPNDTALKQDYAEVLTRSSDPQDNRQAALLLHELLKADGHNLRTLGLLAFNAYEQQQYDQAIDAWQTLLALLPASDERRAMIARSIEQAKTAAGQQNSQLALTISLTPQAEKMLPQGGVLYISVSDGVSPVPVAVKRMPLSHFPLSLTLDDSNAMMPDRLLSAQHQIQVRARISRDGSANPRSGDWSGLSAVTPWDGHQQMAVE…
>P_sp_aB					>P_sp_aB					>P_sp_aB					>P_sp_aB					>P_sp_aB					>P_sp_aB					>P_sp_aB					>P_sp_aB					>P_sp_aB					>P_sp_aB
MTKSELIERLAGQHTHIPAKVVEDAVKEMLEHMATTLAQGERIEIRGFGSFSLHYRAPRTGRNPKTGDKVDLEGKYVPHFKPGKELRDRANIYG--------MRVTRLITILLLNALGIVLFLSWYLPPEHGFWFGIDKSVFFGFNNQMGTHPLFALIVAITNFRGFDAVSLLAMGLLYLSIWRQETPEARRRMLAIGITMLLTAVVLNQLGHLLPVKHSSPTRFFDHVYRVSELTGIPAKDASKDSFPGDHGMMLIIFACFIWRYFGFSRFIVAAAIVVIFSLPRVMAGAHWFTDIAVGSLSVVLVGLSWWLLTPASDVLVNWFYRKLPGKYKPVT---MPELPEVETSRRGIEPHLVGETILHAVVRNSRLRWPVSQEILALSDQPVLSVQRRAKYL…					MQTQNIKKIVLAYSGGLDTSAIIPWLKENYGGCEVVAFVADIGQERGDLEGVEKKALQSGASECHVVDLREEFISDYVYPVLQTGALYEGTYLLGTSMARPIIAKAQVELALKVGADALCHGATGKGNDQVRFETTYTALAPQLKVVAPWREWNLRSREALLDYLKERNIPTTASLEKIYSRDENAWHISTEGGVLESPANAPNKDCWVWTVDPLEAPDQPEDVTVTVEKGRVVAVNGEKLSPFQCLEKLNVLGAKHGVGRIDIVENRLVGIKSRGCYETPGGTIMVNALRAVEQLVLDRDSFKWREQLGHEMSYVVYDGRWFAPLRKSIQAAAESLAEEVNGEVVLQLYKGQATATQKRSANSLYSEEFATFGEDEVYDHRHAGGFIRLFSLSSRIRA…					MRLVQLSRESLQFPPPEMALREPNGLLAMGGDLSPARLLSAYQCGIFPWFSPGDPILWWSPDPRAVLLPEQFHLSRSMKRFHSRSPYRVTMNESFDEVIEGCATGREEGTWITFEMKRAWLRLYELGHAHSIEVWDEHQLVGGMYGLAMGQIFCGESMFSRQQNASKTALWVFCQHFIRHQGRLVDCQVLNPHTASLGAQEIPRADYLQYVQSLASQPVSDGCWQTQTLF--MSIATASADKIQVRNLNFYYGKFHALKNINLDIAKNEVTAFIGPSGCGKSTLLRTFNKMYSLYPEQRAEGDILLDGENILATQQDIALLRARVGMVFQKPTPFPMSIYDNIAFGVRLFEKLSRADMDERVQWALTKAALWNETKDKLHQSGYSLSGGQQQRLCIARG…					VELKATSMGKRLAQHPYNRVRLMAAGVEVSGDKHEYLIPFNQLLDIACKRGLVWGELEFLLADEKVVRLHGTEWQETQRFHHYLMQAWQSWSLEMSAVCREVLQSLHDEIETFGAQDRWLNRHELQGLKTKILKQFDALPMPLIRLKEFADCRENWAFCQRWLDQGDAALQQRNRDWTAAMLSRYQAFFASVESTPLNQSQCEAVVNGENSLLVLAGAGSGKTSVLVARAGWLMQRKLASADQILLLAFGREAAKEMNERIQSRLSADDIQARTFHSLALHIIREGSNKQPVISKLESDADARRALLIREWQQQCHEKKAMANGWRQWLRDELQWELPEGPFWEDDRLAKRLASRLERWLGLMRMHGGAQAAMIADVPEEVRDLFSKRIKLMAPLLKAW…					MAMRLNDDLQTDGEMHEINVTPFIDVMLVLLIIFMVAAPLATVDVRVNLPASTSAPQPRPEKPVYLSIKADKQLYVGNDQVTPDSLVNVLTSQTQGNKETTIFFQADKSVDYETLMSVMDKLRTAGYLKIGLMGMETVKK----MSEQQPQSADAAVELNNELKTRREKLSALRANGLAFPNDFRRDSLSNQLLESYGEKSNEELEALDIEVSVAGRMMTRRIMGKASFVTLQDVGGRIQLYVSRDDLAEGIYNEQFKKWDLGDILGARGKLFRTKTGELSIHCSELRLLTKALRPLPDKFHGLADQETRYRQRYLDLIANEESRNTFKIRSQIMAGIRQFMVGRDFMEVETPMMQVIPGGASARPFITHHNALDIDMYLRIAPELYLKRLVVGGFDRV…					MANESGSTNWFRMFQRGQHYMKTWPADKRLAPVFPENRVSSATRFAIRFMPPLAIFTLTWQIAMGGQLGPAVATALFACSLPMQGLWWLGKRSVTPLPPTLLNWFHEVRTRLEEAGQAIAPVEGKPTYQALADLLKRAFKQLDRTFLDDLMSILIDKNTKVICQGFTGGQGTFHSEQALAYGTQLVGGVTPGKGGTTHLGLPVFNTVREAVEATGATATVIYVPAPFCKDGILEAIEAGIKLIITITEGIPTLDMLTVKVKLDEAGVRMIGPNCPGVITPGECKIGIMPGHIHQPGRVGIVSRSGTLTYEAVKQTTDIGYGQSTCVGIGGDPIPGSNFIDILKMFQDDPQTEVIVMIGEIGGSAEEEAAAFIKEHVTKPVVGYIAGVTAPKGKRMGHAG…					----MTRYDLVADMHQCVNDLELALGELRQLIEATPLLIARVFSLPPVVKGREHEAITRIAVEQHLGERALKMALDHYCRLFMQHQSEQLSTKAAVRLPGALCIECDAQQEAEIVSLVELINQLKARLEQLITVDSGLPSEARFEFVHQHLRGLITLNAYRTITLLSAPDSLRFGWANKHIIKNLRREEVIAQLEKSLKSGRAKAPWSREQWAEKVQEELASVRALPASARLKIKRPVKVQPVARVWRADEQKQT					VNQTKRTEILHRLQQNNPHPTTELNFSSPFELLIAVLLSAQATDVSVNKATAKLYPVANTPAAMLALGVDGVKEYIKTIGLFNSKAENVIKTCRILLEQHNGEVPEDRAALEALPGVGRKTANVVLNTAFGWPTIAVDTHIFRVSNRTKFAPGKNVEEVEQKLLKVVPAAYKVDCHHWLILHGRYTCVARKPRCGSCLIEDLCEYPDKVE--MNKVLLYCRPGFEKECAAEISAKAAEREIYGFPRVKDDSGYVLFECYQFEDADRLARELPFDELIFARQMLVVGEMLRDLPQEDRITPIVGMLTGVVEKGGELRVEVPDTNEAKELTKFCRKFTVPLRSALRESKILLNYESPKRPVVHVFFIAPGTCYVGYSIRENSSPFYMGIPRLKFPSDAPSR…					MSKIVKVIGREIIDSRGNPTVEAEVHLEGGFVGLAAAPSGASTGSREALELRDGDKSRFLGKGVTKAVAAVNGPIAEAVKGKDAKDQANIDKIMIDLDGTENKSNFGANAILAVSLAAAKAAAASKGQPLYEHIAELNGTPGKYSMPLPMMNIINGGEHADNNVDIQEFMIQPVGAANLKEAIRMGSEVFHNLAKVLKSKGMSTAVGDEGGYAPNLGSNAEALAVIAEAVKAAGYELGKDITLAMDCAASEFY--KDGKYVLAGEGGKAFTSEEFTHFLEDLTKQYPIVSIEDGLDESDWDGFAYQTKVLGDKIQLVGDDLFVTNTKILKEGIDKGIANSILIKFNQIGSLTETLAAIKMAKDAGYTAVISHRSGETEDATIADLAVGTAAGQIKTGSM…					MSAFWITLFLLLLAACTLFMAAGWRQRQASTDDRDRLNQRFYHQRIDELAQDEAQGVVAERPLMERELQQTLLADIPPS-QAMQSH-TSSRWILLPGLIVLIAVSLGTYLKTGGLAQFTGWMQVQQAYPELRARLMDPGAKPLSMEELARLELGLRTALQTEPDNLADWTMLGRLGMVLNNTEIASQAFEHALQLAPNDLALKQDYAEVLTRSSDPQDNRQASLLLQSLLKADPHNLRTLSLLAFNAYGQQQYDQAIDAWQTLLALLPADDKRHAMIARSIEKARSEAGQQSRQLALTVTLTPEAEKMLPPDGVLYISVSDGDSPVPVAVKRMPLSHFPLTLTLDDSNAMMPDRLLSAQHQVAVRVRVSRDGSANPQPGDWLGLSAVTPWDGHQSIAVE…
>P_deleyi					>P_deleyi					>P_deleyi					>P_deleyi					>P_deleyi					>P_deleyi					>P_deleyi					>P_deleyi					>P_deleyi					>P_deleyi
MTKSELIERLAGQHTHIPAKVVEDAVKEMLEHMATTLAQGERIEIRGFGSFSLHYRAPRTGRNPKTGDKVDLEGKYVPHFKPGKELRDRANIYG--------MRATRLVTILLLNALGVVLFLSWYLPPQHGFWFGIDKAIFYGFNNQMVTHPLFALIVAITNFRGFDVVSLLAMGLLYLSIWRQETPPARRRMLAIGITMLLTAVILNQLGHLLPVKHSSPTLFFENVHRVSELTGIPAKDASKDSFPGDHGMMLIIFACFIWRYFGFSRFLIAAAIVVLFSLPRVMAGAHWFTDIAVGSLSVILVGLSWWLLTPASDVLVNWFNRKLPGKYKPVM---MPELPEVETSRRGIEPHLVGETILHAVVRNSRLRWPVSQEILALSDQPVLSVQRRAKYL…					MQTQNIKKIVLAYSGGLDTSAIIPWLKENYGGCEVVAFVADIGQERSDLEGVEKKALQSGASECHVVDLREEFISDYVYPVLQTGALYEGTYLLGTSMARPIIAKAQVELALKVGADALCHGATGKGNDQVRFETTYTALAPQLKVVAPWREWNLRSREALLDYLKERNIPTTASLEKIYSRDENAWHISTEGGVLESPANAPNKDCWVWTVDPLEAPDQPEDVTVTVEKGRVVAVNGEKMSPFQCLEKLNVLGAKHGVGRIDIVENRLVGIKSRGCYETPGGTIMVNALRAVEQLVLDRDSFKWREQLGHEMSYVVYDGRWFAPLRKSIQAAAESLAEEVNGEVVLQLFKGHATATRKRSANSLYSEEFATFGEDEVYDHRHAGGFIRLFSLSSRIRA…					-----------------MALREPNGLLAMGGDLSPARLLNAYQHGIFPWFSSGDPILWWSPDPRAVLLPGQFHLSRSMKRFHSRSPYRVTMNQAFDAVIEGCASGREEGTWITFEMKRAWLRLYELGHAHSIEVWDEQQLVGGLYGLALGQIFCGESMFSRQQNASKTALWVFCQHFIRHQGQLIDCQVLNPHTASLGAQEIPRADYLQYVQRLASQPVSEGCWQTQTLF--MSIATASAGKIQVRNLNFYYGRF					-------MGKRLAQHPYNRVRLLAAGVEVSGDKHEYLIPFNQLLDIACKRGLVWGELEFLLADEKVVRLHGTEWQETQRFHHYLMQAWQRWSLEMSEVCCEVLQALSDEIRTFSEQDRWLNRHELQGLKSRILNQFDALPLPLARLNAFAACRDNLAFCQQWLEQGEAALRQRNRDWTAAMLTRYQAFFASVESTPLNPSQCEAVVNGEDSLLVLAGAGSGKTSVLVARAGWLMQRNLASAGQILLLAFGREAAE					MAMRLNDDLETQGEMHEINVTPFIDVMLVLLIIFMVAAPLATVDVRVNLPASTSAPQPRPEKPVYLSIKADKQLYVGNDRVTPDSLVNVLTSQTQGNKETTIFFQADKSVDYETLMSVMDKLRTAGYLKIGLMGMETVKK----MSEQEPQSADAAVELNNELKTRREKLSALRANGVAFPNDFRRDSLSGQLHERYDEKSNEELEDLGIEVSVAGRMMTRRIMGKASFVTLQDVGGRIQLYVARDDLAEGIYNEQFKKWDLGDILGARGKLFKTKTGELSIHCSELRLLTKALRPLPDKFHGLADQETRYRQRYLDLIANDESRNTFKIRSQIMAGIRQFMVGRDFMEVETPMMQVIPGGASARPFITHHNALDIDMYLRIAPELYLKRLVVGGFDRV…					------------MFQRGQHYMKTWPADKRLAPVFPENRVSTATRFAIRFMPPLAIFTLTWQVAMGGQLGPAVATALFACSLPMQGLWWLGKRSITPLPPTLLNWFHEVRARLEDAGQAIAPVEGKPTYQALADLLKRAFKQLDRTFLDDLMSILIDKNTKVICQGFTGGQGTFHSEQALAYGTQLVGGVTPGKGGTTHLGLPVFNTVREAVEATGATATVIYVPAPFCKDGILEAIEAGIKLIITITEGIPTLDM					----MTRYDLVADMHQCVNDLELALGELRQQIDAQPLLIARVFSLPPVVKGREHEAITRIAVDQHLGERARTMALDHYCRLFMQHQSEQLSTKAAVRLPGALCIECDAAREAELDALVTVINQLKARLEQLITVESGLPSEARFEFVHQHLRGLITLNAYRTITLLSAPDSLRFGWANKHIIKNLKREEVIAQLEKA----------------------------------------------------------					VNQTKRTEILRRLQQNNPHPTTELSFSSPFELLIAVLLSAQATDVSVNKATAKLYPVANTPAAMLALGVEGVKSYIKTIGLFNSKAENVIRTCRILLEQHNGEVPEDRAALEALPGVGRKTANVVLNTAFGWPTIAVDTHIFRVSNRTKFAPGRNVEEVEQKLLKVVPAAYKVDCHHWLILHGRYTCVARKPRCGSCLIEDLCEFPDKTE--MNKVLLYCRPGFEKECAAEISARAAEREIYGFPRVKDDAGYVLFECYQFEDAERLARELPFDELIFARQMLVVGELLRDLPQEDRITPIVGMLTGVVEKGGELRVEVPDTNEAKELTKFCRKFTVPLRAALRESKILLNYESPKRPVVHVFFIAPGTCYVGYSFRENSSPLYMGIPRLKFPADAPSR…					MSKIVKVIGREIIDSRGNPTVEAEVHLEGGFVGLAAAPSGASTGSREALELRDGDKSRFLGKGVTKAVAAVNGPIAEAVKGKDAKDQANIDKIMIDLDGTENKSNFGANAILAVSLAAAKAAAASKGQALYEHIAELNGTPGKYSMPLPMMNIINGGEHADNNVDIQEFMIQPVGASNVKEAIRMGSEVFHNLAKVLKSKGMSTAVGDEGGYAPNLGSNAEALAVIAEAVKAAGYELGKDITLAMDCAASEFY--KDGKYVLAGEGGKAYTSEEFTHFLEDLTKQYPIVSIEDGLDESDWDGFAYQTKVLGDKIQLVGDDLFVTNTKILKEGIEKGIANSILIKFNQIGSLTETLAAIKMAKDAGYTAVISHRSGETEDATIADLAVGTAAGQIKTGSM…					MSAFWITLFLLLLAACTLFLAAGWRQRQASTGDRDRLNQRFYHQRVEELAQDEAQGVVAERPLMERELQQTLLADIPPA-EAQASH-RSSRWILLPGVIVLVVVSLGTYLKTGGLAQFTGWMQVRQAYPELRARLMDPGAKPLSMEELARLQLGLRTALQQEPDNLADWTMLGRLGMVLNNAEIASQAFERALQLAPNDLALKQDYAEVLTRSSDPQDNRQATLLLKSLRKADPQNLRTLSLLAFNAYGQQQYDQAIDAWQTLQGLLPAGDARHAMIARSIEKARSAAGQQGRQLALNVTLTPQAEKMLPQDGVLYISVSDGVSPVPVAVKRLPLSHFPLALTLDDSNAMMPDRLLSAQHQVAVRVRISRDGSATPQPGDWQGQSAVTPWDGQQPIAVE…
>P_eucrina					>P_eucrina					>P_eucrina					>P_eucrina					>P_eucrina					>P_eucrina					>P_eucrina					>P_eucrina					>P_eucrina					>P_eucrina
MTKSELIERLAGQHTHIPAKVVEDAVKEMLEHMATTLAQGERIEIRGFGSFSLHYRAPRTGRNPKTGDKVELEGKYVPHFKPGKELRDRANIYG----VLLFMRATRLVTILLLNALGVMLFLSWYLPANHGFWFTIDKGIFFSFNDLMVDHHAFAVLVAITNYRGFDAVSLLAMGLLYLAFWRRETPEGRRRMLAIGITMLLTAVLLNQLGHLLPVKHASPTLFFDNVHRVSELTGIPAKDASRDSFPGDHGMMLIIFACFMWRYFGFRAFLTGVLIVVLFALPRIMAGAHWFTDIAVGSLSVILVGLSWWLLTPASDKLVAWLYRTLPGKYKPRG---MPELPEVETSRRGIEPHLVGETILHAIVRNGRLRWPVSSEIHALSDQPVLSVQRRAKYL…					MSTQNIKKIVLAYSGGLDTSAIIPWLKENYGGCEVVAFVANIGQDPADLEGVEKKALQSGASECHVVDLREEFISDYVYPVLQTGALYEGTYLLGTSMARPIIAKAQVELALKVGADALCHGATGKGNDQVRFETTYTALAPQLKVVAPWREWDLRSREALLDYLKERNIPTTASLEKIYSRDENAWHISTEGGVLESPWNAPNKDCWVWTVDPLEAPDQPENVTVTVEKGCVVAVNGEQLSPFQCLEKLNVLGAKHGVGRIDIVENRLVGIKSRGCYETPGGTIMVNALRAVEQLVLDRDSFKWREQLGQEMSYVVYDGRWFAPLRQSIQAAAASLAEEVNGEVVLQLYKGQATAIQKKSANSLYSEEFATFGEDEVYDHRHAGGFIRLFSLSSRIRA…					MRLVQLSRDSLHFPPPEMALREPNGLLAMGGDLSPARLINAYQHGIFPWFSPGDPILWWSPDPRAVLMPDAFHLSRSMARFHRRSPYRVTMNHAFAQVLEGCATGRQEGTWITFEVKRAWLRLYELGHAHSVEVWHENSLVGGMYGLALGQMFCGESMFSRQENASKTALWVFSQHFRAHQGRLIDCQVLNPHTASLGATEIPRANYLQELKKLAWQPVAEGCWQTQTLF--MSMATPSAGKIQVRNLNFHYGKFHALKDINLDIARNQVTAFIGPSGCGKSTLLRTFNKMYSLYPEQRAEGEILLDGDNILASHQDIALLRARVGMVFQKPTPFPMSIYDNIAFGVRLFEKLSRADMDERVQWALTKAALWNETKDKLHQSGYSLSGGQQQRLCIARG…					MELKATAMGKRLAQHPYNRVRLLTAGVEVSGDRHEYLIPFNQLLDISCKRGLVWGELEFLLAENQVVRLHGTEWQETQRFYHYLQHAWQQWSAEMSHISTGVLDELLQHISQLTAEDRWLKRSELAAILARVNETIAALPLPLARLEALDNCRERWHRCRQWLEQGEATIRQRNRRWSEQVIQANPDFFATVERSPLNRAQAEAVVNGEETLLVLAGAGSGKTAVLVARAGWLLQRRLAHPDQILLLAFGREAAEEINQRLDTQLNVKALQARTFHALALHIIRESGRKPPVISQLESDSAARRQLLLESWREQCAAKKAQASGWRQWLEEDLAWTLPDGAFWQDSAIAQRLAPRLEQWLGLLRMQSGNQAETIAAVPEAWRDSFSKRIKLMAPLLKAW…					MAMRLNDEAAGDSEMHEINVTPFIDVMLVLLIIFMVAAPLATVDVRVNLPASTSAPQPRPEKPVYLSIKADKQIYIGNDAVTKETLVNALTAQTAGDKQTTIFFQADQSVDYATLMAVMDQLRAAGYLKIGLMGMETAGK----MSEQQPQNADAALELNNELKARREKLSALREKGVAFPNDFRRDTTSDRLHASYDDKSNEELEALGVEVSVAGRMMTRRIMGKASFATLQDVGGQIQIYVSRDDLPEGVYNEQFKKWDLGDILGARGKLFKTKTGELSIHISELRLLTKALRPLPDKFHGLADQETRYRQRYLDLISNDESRHTFQVRSKIMAGIRQFMVNRDFMEVETPMMQVIPGGASARPFITHHNALDIDMYLRIAPELYLKRLVVGGFDRV…					MANDAGNPGWFGLFQRGQHYMKTWPADKRLAPVFPENRVVTATRFAIRFMPPLAVFTLTWQIALGGQLGPAIATALFACSLPMQGLWWLGKRAGTPLPPALLQWFNEVRSKLEEAGQAIAPVEGKPTYQALADVLKRAFRQLDRTFLDDLMSILIDKNTKVICQGFTGGQGTFHSEQALAYGTQLVGGVTPGKGGTTHLGLPVFNTVREAVEATGATATVIYVPAPFCKDGILEAIDAGIKLIITITEGIPTLDMLTVKMKLDEAGVRMIGPNCPGVITPGECKIGIMPGHIHQPGRVGIVSRSGTLTYEAVKQTTDIGYGQSTCVGIGGDPIPGSNFIDILQMFQDDPQTEAIVMIGEIGGSAEEEAAAFIKEHVTKPVVGYIAGVTAPKGKRMGHAG…					----MARYDLVADLHECVNTLEQRLGALRTSIEQQPLLVARVFSLPAIEKGHEHDEIDKIAVTQHLGKSAREMALTHYCRLFMQHQSEKISTKAAVRLPGAICIEADEQAAEQIAQQVSEINALKQRLEQLITVESGLPSEARFEFVHQHLRGLITLNAYRSVPLLNAPDTLRFGWANKNIIKNLTREAVIEQLERSLKANRAQAPWTREQWAEKVQLELELVRSLPAGAKLKIKRPVKVQPIARVWRASEKKQT					VNKEKRLQILTRLRDNNPHPTTELQFSSPFELLIAVLLSAQATDVSVNKATARLYPVANTPAAMLALGVDGVKEYIKTIGLFNSKAENVIKTCRILLEQHGGAVPEDRAALEALPGVGRKTANVVLNTAFGWPTIAVDTHIFRVSNRTRFAPGKNVEEVEDKLLKVVPAAFKVDCHHWLILHGRYTCIARKPRCGACLIEDLCEYRDKTEI-MNKVLLYCRPGFEKECAAEISAKAAEREIYGFPRVKEEAGYVLFECYQPEDAEKLLRSLPFAELIFARQMLVVGELLRDLPPEDRITPITGMLTGVVEKGGELRVEVPDTNEAKELTKFCRKLTVPLRASLRASNILLNYESPKRPVVHVFFIAPGTCYVGYSLPENNSPFYMGIPRLKFPSDAPSR…					MSKIVKVIGREIIDSRGNPTVEAEVHLEGGFVGLAAAPSGASTGSREALELRDGDKSRFLGKGVTKAVAAVNGPIADAVKGKDAKDQANIDKIMIELDGTDNKSNFGANAILAVSLAAAKAAAASKGLPLYAHIAELNGTPGKYSMPLPMMNIINGGEHADNNVDIQEFMIQPVGAKNIKEAIRMGSEVFHNLAKVLKAKGMSTAVGDEGGYAPNLGSNAEALAVIAEAVKAAGYELGKDITLAMDCAASEFY--KDGKYVLAGEGNKAFSSEEFTHFLEDLTKQYPIVSIEDGLDESDWNGFAYQTKVLGDKIQLVGDDLFVTNTKILKEGIDKGIANSILIKFNQIGSLTETLAAIKMAKDAGYTAVISHRSGETEDATIADLAVGTAAGQIKTGSM…					MIVFCTTLIVLLAAAVALFLAAGWRQREHHAGERDRLNTAFYQQRLRELQRDETEGVVADRAEMERDLQQMLLTDVPDG-QTLPAR-QSSRWILLPGVILLLLVTTGVYLQTGGYAQLAGWLAVQRDYPALRARVMDPDAQPLTMEELARLQLGLRTALQQTPGSADEWAMLGRLGMVLNNATAAGQAFERALQRAPDSLELQQDYAEVLTRSGDPQDNRQAGLLLHALLKRDSANLRTLSLLAFNASGQQNYTEALDAWRAMLALLPAGDPRITLIQRSIEQAKTAAGQQAVALSLRVKLSPQAEKMLPPDGVLYISVSDGVSPVPVAVKRLPLSHFPLSLTLDDSNAMMPDRLLSAQHQVQVRVRIARDGSANPQAGDWFGLSAITSWEGHQPLTVE…
>E_billingiae					>E_billingiae					>E_billingiae					>E_billingiae					>E_billingiae					>E_billingiae					>E_billingiae					>E_billingiae					>E_billingiae					>E_billingiae
MTKSELIERLAGQHSHIPAKVVEDAVKEMLEHMATTLAQGERIEIRGFGSFSLHYRAPRTGRNPKTGDKVELEGKYVPHFKPGKELRDRANIYG--------MTTKRLLMILLLNALGFALFFSWYLPENHGFWFPIDKDLFYWFNTHLVTSKPLLWLLAITNFRAFDGVSLLAMGALYLHFWRRETPVGRRRLLAIGIAMLICAVVLNQLGHLIPVSHPSPTKFFPDVNHVSKLTGIPAKDASADSFPGDHGMMLMIFACFMLRYFSRRAFMLAVAIVLIFAAPRIMIGAHWFTDVVVGSLSIVLVGMSWCLMTPLSDFIVNALYRHLPGKYKPVQSSSMPELPEVETSRRGIEPHLVGATILHAIVRNDRLRWPVSLEIQSLSDQPVLSVQRRAKYL…					MQDKSIKKIVLAYSGGLDTSAIIPWLKENYGGCEVVAFVADIGQERGDLEGVEQKALQSGASECHVVDLREEFISEYVYPVLQTGALYEGTYLLGTSMARPIIAKAQVELALKVGADALCHGATGKGNDQVRFETTYTALAPQLKVVAPWREWNLRSREALLDYLKERNIPTTASLEKIYSRDENAWHISTEGGVLESPWNAPNKDCWVWTVDPLEAPDQPEQVTVTVEKGRVVAVNGKAMSPFQCLDALNVIGAKHGVGRIDIVENRLVGIKSRGCYETPGGTIMVNALRAVEQLVLDRDSFKWREQLGHEMSYVVYDGRWFAPLRKSIQAAAESLAEDVNGEVVLQLYKGTVTATQKKSANSLYSEEFATFGEDEVYDHRHAGGFIRLFSLSSRIRA…					MRLIQLSRESLNFPPPEMALREPNGLLAMGGDLSPARLLSAYHRGIFPWFSPGDPILWWSPDPRAVLYPESFHLSRSMKRFHQQSPYRVTLNQSFYDVIEGCASNREEGTWITNEVRRAWLKLFEAGHAQSIEVWHENELVGGIYGLALGQIFCGESMFSRRENASKTALLVFSRYFQQQGGKVIDCQVLNPHTASLGAEEIGRADYLHQVNSLADQPLSANCWQPQTLF---MADNTSSKMIQVRDLNFYYGKFHALKNINLDIAKNQVTAFIGPSGCGKSTLLRTFNKMFSLYPEQRAEGEIMLDGENILTASQDIALLRARVGMVFQKPTPFPMSIYDNIAFGVRLFEKLSRADMDERVQWALTKAALWTETKDKLHQSGYSLSGGQQQRLCIARG…					MELKATSLGKHLAQHPYNRVRMLAAGVEVSGEKHEYLIPFNQLLAIKCKRGMVWGELEFALPEDKVVRLHGTEWQETQRFYHYLNQAWQQWSEEMSLVSSEVLQQLVTRLQEGEQQDKWLKRSDMAGWRTAIQEAFCSLPLPVERLDEFDNCRENYQFCLAWLNNSDAQRQKRNGQWSEKMLAQYADFFNTVETSPLNSSQAKAVVNGEDALLVLAGAGSGKTSVLVARAGWLLMRKQASAEQILLLAFGRQAAEEMNERIKARLNTDGIQARTFHSLALNIIQQGSSKSPSISKLETDTTLRHKLLIDVWRQQCGEKKAHANGWRQWLQDELEWEIGEGDYWKEERLAKRLASRLERWLGLMRMHGGAQAAMIESAPEEVRDLFSKRVKLMAPLMKAW…					MAMRLNEDLESNGEMHEINVTPFIDVMLVLLIIFMVAAPLATVDVRVNLPASTSAPQPRPEKPVYLSIKADKQLFIGNNAVTPETLLNALNSQTEGNKETTIFFQADKSVDYETLMGVMDKLRQAGYLKIGLMGMETAGK----MSEQQPQGADVALELNNELKARREKLSALRENGVAFPNDFRRDHISEQLHAEYDGRENEELEALGIEVSVAGRMMTRRIMGKASFVTLQDVGGRIQLYVSRDDLAEGIYNEQFKKWDLGDIVGARGKLFKTKTGELSIHCSELRLLTKALRPLPDKFHGLADQETRYRQRYLDLIANEESRKTFKIRSQIMAGIRSFMVGREFMEVETPMMQVIPGGASARPFTTHHNALDIDMYLRIAPELYLKRLVVGGFDRV…					MANESGTVGWFKLFQCGQHYMKTWPADKRLAAIFPENRVSRATRFSIRFMPPLAVFAMSWQIALGGQLGPAVATALFACSLPMQGLWWLGKRSVTPLPPTLLNWFHEVREKLQAAGQAIAPVEGKPTYQSLADVLKRAFKQLDKTFLDDLMSILIDKNTKVICQGFTGGQGTFHSEQALAYGTQLVGGVTPGKGGTEHLGLPVFNTVREAVEATGATASVIYVPAPFCKDGILEAIEAGIKLIITITEGIPTLDMLTVKVKLDEAGVRMIGPNCPGVITPGACKIGIMPGHIHQPGRIGIVSRSGTLTYEAVKQTTDIGYGQSTCVGIGGDPIPGSNFIDILKLFQEDPQTEAIVMIGEIGGSAEEEAAAFIKEHVTKPVVGYIAGVTAPKGKRMGHAG…					----MSRYDAVDNLHRCVEALQTALAALTQQLPQLRLLMARVFELPPVHKGQEHQPLLEINVTQHLAQSALNLALSHYSRLFIQHQSESLSTKAAVRLPGAICFEANPEQSALIRQHVEAINSLKYRLEQIITVESGVEAEERFEFVHTHLRGLITLNAYRAITLLESPDSLRFGWANKHIIKNVSREEMLEKLKKSVASGRAMAPWTREQWAEKLEEEMAIINSLPKEAKLKIKRPVKVQPIARVWNKQQQKQT					VNKDKRQQILSRLRDNDPHPTTELVFTSPFELLIAVLLSAQATDVSVNKATAKLYPVANTPEAMLALGVEGVKAYIKTIGLFNTKAENVIKTCRILHEQHQGVVPEDRAALEALPGVGRKTANVVLNTAFGWPTIAVDTHIFRVCNRTNFAPGKNVELVEDKLLKVVPNEFKVDCHHWFILHGRYTCVARKPRCGSCLIEDLCEFGEKTEV-MNKVLLYCRQGFEKECAAEITAKAAQREVFGFARVKDDSGYVLFECYQAEEAEKLIAELPFSELIFARQMIVVGELLRDLPPEDRVTPVTGMLTGFVEKGGELRVEVPDTNESKELLKFCRKFTVPLRSSLRAAGILLKYETDRRPVVHVFFIAPGCCYVGYSMPKNNSPLFMGIQRLKFPSDAPSR…					MSKIVKVIGREIIDSRGNPTVEAEVHLEGGFVGMAAAPSGASTGSREALELRDGDKSRFLGKGVTKAVAAVNGPIANAVTGKDAKDQANIDKIMIDLDGTENKSQFGANAILAVSLAAAKAAAAAKGMPLYEHIAELNGTPGKFSMPLPMMNIINGGEHADNNVDIQEFMIQPVGAKTLKEAIRMGSEVFHTLAKVLKSKGMGTAVGDEGGYAPNLGSNAEALAVIAEAVKAAGYELGKDITLAMDCAASEFY--KDGKYVLAGEGNKEFTSEEFTHFLEDLTKQYPIVSIEDGLDESDWAGFAYQTKVLGDKIQLVGDDLFVTNTKILKEGIDKGIANSILIKFNQIGSLTETLAAIKMAKDAGYTAVISHRSGETEDATIADLAVGTAAGQIKTGSM…					MGGFWLTILALLIASCALLLIAGGRKHRPVSIERDALNKAFYHQRLKELEEDEDQGVVGERPEMVRELQQTLLHDIPKD-EEIVER-SVGRWVLLPGVLVLILVSLGFYFKTGGFAQVMSWQQVKNDLPALRAQVMDPAAKPLTMEELARLGLGVRSSLQDDPQNVNDWLMLGRIGMVLNNADTATKAFQRAMQLAPNNPEVKLSYADVLTRSPDPEDNRQASVMLNEMIKADGDNLRVLSLLAFNAFSQQHYPEAIAVWQKMLQLLPADDKRGVMIQRSIEQAKTESGKQNSHLALSVTLAPGAEKMLPAGGVLYISVADGVSPVPVAVKKLPLSHFPLSLTLDDSNAMMPERLLSAQHQVQVRVRISRDGSANPQSGDWFGTSAVTPFDGHQQLSVE…
>P_rwandensis					>P_rwandensis					>P_rwandensis					>P_rwandensis					>P_rwandensis					>P_rwandensis					>P_rwandensis					>P_rwandensis					>P_rwandensis					>P_rwandensis
MTKSELIDRLAGQHTHIPAKVVEDAVKEMLEHMATTLAQGERIEIRGFGSFSLHYRAPRTGRNPKTGDKVDLEGKYVPHFKPGKELRDRANIYG--------MRASRLITILLLNVLGLVLFFSWYLPPDHGFWFGLDKAIFFGFNNQMVDHPGFALLVAITNFRGFDAVSLLAMGLLYLWFWRRETPQGRRRMLAIGIAMLLTAVVLNQLGHLIPVQHASPTLFFENVHRVSELTGIPAKDASSNSFPGDHGMMLIIFACFMWRYFGFRAFLMGMVIVVVFSLPRVMAGAHWFTDIAVGSLSVILVGLSWWLLTPASDKLVNWLYRALPGKHKPRT---MPELPEVETSRRGIEPHMVGATILHAIVRNSRLRWPVSHEIHALSDQPVLSVQRRAKYL…					MSTQNIKKIVLAYSGGLDTSAIIPWLKENYGGCEVVAFVANIGQDPADLEGVEKKALQSGASECHVADLREEFISEYVYPVLQTGALYEGTYLLGTSMARPIIAKAQVELALKVGADALCHGATGKGNDQVRFETTYTALAPQLKVVAPWREWDLRSREALLDYLKERNIPTTASLEKIYSRDENAWHISTEGGVLESPANAPNKDCWVWTVDPLEAPDQPENVTVTVEKGRVVAVNGEKLSPFQCLEKLNVLGAKHGVGRIDIVENRLVGIKSRGCYETPGGTIMVNALRAVEQLVLDRDSFKWREQLGHEMSYVVYDGRWFAPLRKSIQAAAESLAEDVNGEVVLQLYKGQAIATQKTSANSMYSEEFATFGEDEVYDHSHAGGFIRLFSLSSRIRA…					-----------------MALREPNGLLAMGGDLSPARLMNAYQRGIFPWFSPGDPILWWSPDPRAVMLPESFHLSRSMERFHRKSPYRVTMNQAFPQVLEGCASGRQEGTWITFEVKRAWLRLYELGHAHSIEVWSDHRLVGGMYGLALGQIFCGESMFSRQENASKTALWVFAQHFLAHQGRLIDCQVLNPHTASLGAVEIPRVDYLQYVQTLAWQPVLSGCWQTQTLF--MSMATTSAGKIQVRNLNFYYGKF					MELKATSMGKRLAQHPYNRVRLLAAGVEVSGDRHEYLIPFNQLMDITCKRGMVWGELEFQLPEDKVVRLHGTEWQETQRFFHFLQQAWQQWSQEMSDVSAEVLTALEQEILTFTQQDRWLKRSELSTVKESIRRQFSALPLPLARLETFDNCRALWRFCQQWLEQGETAIRQRNREWTTKVIKEYHDFFSTIETTPLNLSQSEAVVNGEDALLVLAGAGSGKTSVLVARAGWLLKRKLAQPDQILLLAFGRQAADEMNERIQARLGESAIQARTFHALAMHIIREGSNKQPVISKLESDSKVRRQLLIETWREQCNSKKAQASGWRQWLQDEMEWDVAEGAFWQDDKLAQRLASRLERWLGLMRMHGGAQAVMIDDVPEALRENFSKRIKLMAPLLKAW…					MAMRLNDDSVGDGEMHEINVTPFIDVMLVLLIIFMVAAPLATVDVRVNLPASTSAPQPRPEKPVYLSIKEDKQIYIGNDAVTKETLVNALMAQTEGNKDTTIFFQADKSVDYETLMSVMDQLREAGYLKIGLMGMETVKR----MSEQQPQSADAALELNNELKARREKLSALREKGIAFPNDFRRDTTSDLLHASYDAKENEELEALGVEVSVAGRMMTRRIMGKASFATLQDVGGQIQIYVSRDDLPEGVYNEQFKKWDLGDILGARGKLFKTKTGELSIHITELRLLTKALRPLPDKFHGLADQETRYRQRYLDLISNDDSRNTFKVRSKIMAGIRQFMVNRDFMEVETPMMQVIPGGASARPFITHHNALDIDMYLRIAPELYLKRLVVGGFDRV…					--------------------MKTWPSDKRLAPMFPENRVVTATRFAIRFMPPLAIFTLTWQIAMGGQLGPAIATALFACSLPMQGLWWLGKRSVTPLPPTLLHWFHEVRAKLEEAGQAIAPVDGKPTYQALADVLKRAFKQLDRTFLDDLMSILIDKNTKVICQGFTGGQGTFHSEQALAYGTQLVGGVTPGKGGTTHLGLPVFNTVREAVEATGATATVIYVPAPFCKDGILEAIDAGIKLIITITEGIPTLDM					----MPRYDLVADLHECVNALELGLSTLRQQVEQQPLLIARAFSLPEIEKGHENDEIERIAVTQHLGQKARDMALAHYCRLFMQHQSDKLSTKSAVRLPGAICIEADETATEQIRQQVADINALKLRLEHLITVESGLPSEARFEFVHQHLRGLITLNAYRSVTLLQAPDSLRFGWANKNIIKNLTREAVVEQLERSLKANRAQAPWTREQWAEKVQQELEMILSLPADAKLKIKRPVKVQPIARVWRANEKKQV					VNKDKRLQILTRLRDDNPHPTTELNFSSPFELLIAVLLSAQATDVSVNKATAKLYPVANTPAAVLALGVDGVKEYIKTIGLFNSKAENVIKTCRILIEQHGGEVPEDRAALEALPGVGRKTANVVLNTAFGWPTIAVDTHIFRVSNRTRFAPGKNVEEVEDKLIKVVPSAFKVDCHHWLILHGRYTCIARKPRCGSCLIEDLCEFDAKTDL-MNKVLLYCRPGFEKECAAEISAKAAEREIYGFPRVKDDSGYVLFECYQLEDAEKLMKTLPFAELIFARQMLVVGELLRELPTEDRITPIVGMLMGVVEKGGDLRVEVPDTNEAKELTKFCRKLTVPLRASLRASNILLNYESPKRPVVHVFFIAPGTCYVGYSLPENNSPFYMGIPRLKFPSDAPSR…					MSKIVKVIGREIIDSRGNPTVEAEVHLEGGFVGLAAAPSGASTGSREALELRDGDKSRFLGKGVTKAVAAVNGPIAGAVTGKDAKDQANIDKIMIELDGTENKSNFGANAILAVSLAAAKAAAASKGLPLYAHIAELNGTPGKYSMPLPMMNIINGGEHADNNVDIQEFMIQPVGAKNVKEAIRMGSEVFHNLAKVLKAKGMSTAVGDEGGYAPNLGSNAEALAVIAEAVKAAGYELGKDITLAMDCAASEFY--KDGKYVLAGEGNKAFTSEEFTHFLEDLTKQYPIVSIEDGLDESDWAGFAYQTKVLGDKIQLVGDDLFVTNTKILKEGIDKGIANSILIKFNQIGSLTETLAAIKMAKDAGYTAVISHRSGETEDATIADLAVGTAAGQIKTGSM…					MTGFWITLIILLVAASVLFVSAGWRQREASSGDRDRLNTDFYQQRLRELERDEEEGVVAERPEMVRELQQTLLTDVPTE-HAARIH-HSSRWVLLPGVVVLLLVSVGFYLKTGGLGQLAGWVSVQQEYPELRARLMDPKATPLTMEELARLQLGLRSSLQNDPQNLNDWTMLGRLGMVLNNATSASQAFQRALQLAPNNLELQQDYAEVLTRSSDPQDNRQANVLLKDLLNHDRNNVRTLSLLAFNAFQQQQYDEAISTWQVMLKVLPAGDKRITMIQRSIEQAKTDAGQQNSHLALTVSLAPQAEKMLPQGGVMYISVSDGASPVPVAVKRLPLSHFPLSLTLDDSNAMMQDRLLSAQHQVQVRVRISRDGSANPQSGDWFGLSAVTPWDGHQQMAVE…
>T_ptyseos					>T_ptyseos					>T_ptyseos					>T_ptyseos					>T_ptyseos					>T_ptyseos					>T_ptyseos					>T_ptyseos					>T_ptyseos					>T_ptyseos
MTKSELIERLASQQTHIPAKAVEDAVKEMLEHMASTLAQGERIEIRGFGSFSLHYRAPRTGRNPKTGDKVELEGKYVPHFKPGKELRDRANLAVNAKA----MRLSRLMIILLLNALGIALFFSWYLPEHHGFWFGLDKAIFFGFNNQMVTHHAFAIFVAITNFRGFDLVSLIAMGLLYYSYWRKTDAAGHHRMLAIGVTMLISAVVLNQLGHRIPVVHSSPTLFFHNAHRAGELTGIPTKDASGDSFPGDHGMMLMIFACFMWRYFGGRAFIKALVIFFVFAMPRVMAGAHWFTDIAVGSLSVVLVGMSWWLLTPGSDMLVNYLDKKLPRRKK------MPELPEVETSRRGIEPHLTGATVLHAVVRNSRLRWPVSPEILSLSDQPVLSVQRRAKYL…					MQTQGIKKIVLAYSGGLDTSAIIPWLKENYG-CEVVAFVANVGQDPEDLVGVEGKALQSGASECHVVDLREEFISDYVYPVLQTGALYEGTYLLGTSMARPIIAKAQVELALKVGADAVCHGATGKGNDQVRFESTYAALAPQLKVVAPWREWDLRSREALLAYLKERNIPTTATLEKIYSRDENAWHISTEGGVLESPWNASNKDCWVWTTDPLEAPDQPEQVTVKVEKGQVVAVNGEALTPFGCLEKLNVLGAKHGVGRIDIVENRLVGMKSRGCYETPGGTIMVNALRAVEQLVLDRDSYKWREQLGLEMSYVVYDGRWFTPLRKSLQASAESLAEEVNGEVVLQLYKGQVSAIQKKSENSLYSEEFATFGEDEVYDHSHAGGFIRLYSLSSRIRA…					LILPQLAADTLSFPPPSQALTEPDGLLAFGGDLSWQRMREAYRQGIFPWFSEQDPLLWWSPDPRAVLYPEAFHLSRSMARFHRHSPYQVTINRDFEGVIRGCAAERTGGTWITDEVIAAWLTLSQKGYAHSVEVWQDGHLAGGLYGMAVGQLFCAESMFSTRPNASKTALMLFCRHFKAHGGQLIDCQILNPHTASLGATEIPREAYLQQVAALQVLPLADGCWQTGEPG--MAQINAAAAKIQVRDLNFHYGKFHALKNINLDIARNEVTAFIGPSGCGKSTLLRTLNKMYQLYPEQRAEGQILLDGENILENSQDIALLRARVGMVFQKPTPFPMSIYDNIAFGVRLFEKLSRAEMDERVQWALTKAALWTETKDKLNQSGYSLSGGQQQRLCIARG…					MELKATSMGKRLAQHPYNRVRLLPAGVEVSGDRHEYIIPFNQLLGIQCKRGMVWGELEFQLPDNQVVRLHGTEWQETQQFYQHLTNAWQHWTGEMAAVCYQVLSTLHQELLGLLQRDSWLTRADISGVRDKIESRFAALPVPAERITEFESCRPSWFFCQDWLTSAEQQRIERNRQWTEQVMERYGDFFATVGSGPLNPSQCRAVINGEDQLLVLAGAGSGKTSVLAARAAWLLRRNYASADQVLLLSFGREAAREMDQRVQQCTGDTAVTARTFHSLALHIIQQSSNKPPTISALESDAALRRKLLTETWQQQCAQKKSFANGWRQWIEDELAWECADTEFWNDKQLLNRLAGRLEHWVSLIRTHGGSQSVMTEEAPEAIRTLFGKRLKLLAPLLKAW…					MAMRLNEDVENDGEMSEINVTPFIDVMLVLLIIFMVAAPLSTVDVKVNLPASTSKPAPRPEKPVYLSIKADKSLYVGNEPVSAGQLMASIDALTSGNKDTTIFFQADKDVDYATLMSVMDELRAGGYLKVGLMGLESAAH----MSEQQPQQADAIRELNNELKSRSEKLAALRQNGVAFPNDFRRDTQSDKLHAEFDAKENEELEATGIEVSVAGRMMTRRIMGKASFVTLQDAGGRIQLYVSRDDLPEGYYNEQFKKWDLGDILGARGKLFKTKTGELSIHCSELRLLTKALRPLPDKFHGLADQETRYRQRYLDLIANEESRNTFRIRSKIMAGIRQFMVEREFMEVETPMMQVIPGGASARPFVTHHNALDIDMYLRIAPELYLKRLVVGGFDRV…					-MSNTGNVNWFGVLKRGQHYMNTWPNDKRLSPVFPEHRIGKAIRFGIRFMPPVAVFTLCWQIALHAQTGPAVASALFACSLPVQGLWWMGKRAMKPLPPTLLQWYHSVRTKLEQAGQPTAIPDGEPTYQSLADLLKRAFRQLDKTFLDDLMSILIDKNTKVICQGFTGGQGTFHSEQAIDYGTQMVGGVTPGKGGTTHLGLPVFNTVREAVEQTGATASVIYVPAPFCKDSILEAIDAGIKLIITITEGIPTLDM					-----MRYTLVSEMRQCIDEMEQRLGELSLALEALPLLAARVFTLPGVKKGDEQLPLETIPVHLYSGTTARRLALEHLKLLFMQQQSESLSTRSAVRLPGALFFQADKACLSALQDQTCEINRLKQQLERLISRDSGLPSEARFPFVHQHFPGLITLNAYRSVTLEPAPASVHFGWANKHIIKKVTRDDICRQLEKSLKAGRARAPWTREQWAEKVAQELETLLSLPADAPLKIKRPVKVQPIARLRAEGSRKQR					VNKEKRYQILSRLRDNNPHPTTELNFTSPFELLIAVLLSAQATDVSVNKATVGLFAAAPTPQKMLELGVEGVREAIKTIGLFNTKAANVIKTCQILTEKHQGQVPENREALEALPGVGRKTANVVLNTAFGWPTIAVDTHIFRVSNRTGFAPGKNVDQVEAKLLKVVPAEFKVDCHHWLILHGRYTCIARKPRCGSCLIEDLCEYREKTE--MNKVLLYCRSGFEKECAAEITARATALEVFGFARVKDNSGYVIFECYQYEDADKLIRQIPFASLIFARQMIVVGELLRDLPPDDRITPVCGMLTGAVEKGGELRVEVPDTNEAKELLKFCRKFTVPLRAALRQNGILLNYESAKRPVVHVFFIASGTCYVGYSYPENNSPLFMGIPRLKFPSDAPSR…					MSKIVKVIGREIIDSRGNPTVEAEVHLEGGFVGLAAAPSGASTGSREALELRDGDKSRFLGKGVTKAVAAVNGPIAEAVTGKDAKDQANIDKIMIDLDGTENKSKFGANAILAVSLAAAKAAAASKGLPLYAHIAELNGTAGKFSMPLPMMNIINGGEHADNNVDIQEFMIQPVGASSIKEAIRIGSEVFHHLAKVLKAKGLNTAVGDEGGYAPNLASNAEALAVIAEAVKAAGYELGKDVTLAMDCAASEFYNKETGNYELKGEG-KTFTSQEFTHYLEELTQQYPIVSIEDGLNESDWDGFAYQTKVLGDKLQLVGDDLFVTNTKILKEGIEKGIANSILIKFNQIGSLTETLAAIKMAKDAGYTAVISHRSGETEDATIADLAVGTAAGQIKTGSM…					MSALWLSICIILLAACALVLTSGWRSGKDTSTQRDQLNKTFYRQRLNELDEDEQQGVVAEKQEMITELQQTLLTDIPEQ-QTVIRR-SSGRWVLWPGLIILVLVTLGMYLKTGGLAQVLAWEQINAQYPKLRAQLMNPQDKALNIRELEEFEVGLRTSLQSHPDNINDWAMLGRLGMVLNNTPLASQAFQRALKLSPNNNELKLAYASVLVRSQDPQDNRQAQVMLSNMLTAEPNSLRILSLLAAVNYTQQNYDTAIGYWQKMLPLLPANSKEANAVEQGIELARTNAGQQSSKLTLNVAISPTAEKMLTPNGILYISVTDGVSPVPVAVKRIPLSHFPLTVTLDDSNAMVQQRLLSAQHNIQVRVRISRDGSADPQSGDWYGQTGKLPYNGHQTVAVV…
Tree					Tree					Tree					Tree					Tree					Tree					Tree					Tree					Tree					Tree
(P_agglomerans:0.01126,P_sp_aB:0.01498,(P_vagans:0.00959,(P_deleyi:0.02923,(P_anthophila:0.02079,((((P_s_indologenes:0.00055,P_s_stewartii:0.00180)1.000:0.03248,(P_allii:0.01930,P_ananatis:0.01733)1.000:0.01375)1.000:0.05287,(P_septica:0.06862,(((P_sp_At-9b:0.02165,P_cypripedii:0.02498)1.000:0.02608,((P_sp_GM01:0.04348,(P_rodasii:0.02309,P_rwandensis:0.02237)1.000:0.01848)0.950:0.00920,((P_disper…					(P_dispersa:0.02179,(((P_sp_At-9b:0.01784,P_cypripedii:0.01917)1.000:0.02141,(((T_morbirosei:0.07153,(T_sp_NML_06:0.08773,T_ptyseos:0.05473)0.993:0.02555)1.000:0.11725,(E_billingiae:0.07618,(E_tasmaniensis:0.03016,E_pyrifoliae:0.02991)1.000:0.06259)1.000:0.07737)1.000:0.03177,(P_sp_A4:0.10940,(P_septica:0.05966,(((P_s_indologenes:0.04765,P_s_stewartii:0.00183)1.000:0.02193,(P_allii:0.01236,P_anan…					(((P_sp_At-9b:0.01759,P_cypripedii:0.02068)1.000:0.02544,((P_sp_A4:0.09427,((T_morbirosei:0.09284,(T_sp_NML_06:0.11855,T_ptyseos:0.07623)1.000:0.04065)1.000:0.15861,(E_billingiae:0.07780,(E_tasmaniensis:0.03671,E_pyrifoliae:0.03478)1.000:0.07568)1.000:0.06492)1.000:0.02743)1.000:0.02146,(P_septica:0.05472,(((P_s_indologenes:0.00078,P_s_stewartii:0.00290)1.000:0.02268,(P_allii:0.02468,P_ananatis:0…					(P_vagans:0.01106,P_sp_aB:0.01619,(P_agglomerans:0.00941,(P_anthophila:0.02665,(P_deleyi:0.02166,((((P_s_indologenes:0.00121,P_s_stewartii:0.00196)1.000:0.02266,(P_allii:0.01612,P_ananatis:0.01436)1.000:0.01212)1.000:0.03560,(P_septica:0.06029,((((P_sp_GM01:0.02464,(P_rodasii:0.02037,P_rwandensis:0.01758)1.000:0.01416)1.000:0.01064,(P_sp_At-9b:0.01462,P_cypripedii:0.01666)1.000:0.02521)0.000:0.00…					(P_vagans:0.00539,P_sp_aB:0.01302,(P_agglomerans:0.00968,(P_deleyi:0.02388,(P_anthophila:0.01901,((((P_s_indologenes:0.00112,P_s_stewartii:0.00286)1.000:0.02699,(P_allii:0.01433,P_ananatis:0.01500)1.000:0.01263)1.000:0.04706,(P_septica:0.06222,(((P_sp_At-9b:0.01701,P_cypripedii:0.02025)1.000:0.01703,((P_sp_GM01:0.02592,(P_rodasii:0.02302,P_rwandensis:0.02210)1.000:0.01120)0.950:0.00651,(P_wallisi…					(P_agglomerans:0.00708,P_sp_aB:0.00970,(P_vagans:0.00868,(P_deleyi:0.02071,(P_anthophila:0.01856,((((P_s_indologenes:0.00064,P_s_stewartii:0.00296)1.000:0.01964,(P_allii:0.01836,P_ananatis:0.01236)0.991:0.00819)1.000:0.03694,(P_septica:0.05638,(((P_sp_At-9b:0.01472,P_cypripedii:0.01858)1.000:0.02170,((P_sp_GM01:0.02871,(P_rodasii:0.01770,P_rwandensis:0.02096)1.000:0.01712)1.000:0.01422,(P_wallisi…					((P_agglomerans:0.00814,(P_vagans:0.00975,P_sp_aB:0.01166)0.600:0.00356)0.997:0.00551,((((P_s_indologenes:0.00095,P_s_stewartii:0.00229)1.000:0.02572,(P_allii:0.01663,P_ananatis:0.01541)1.000:0.01632)1.000:0.05065,(P_septica:0.06203,(P_sp_A4:0.10300,(((P_sp_At-9b:0.01967,P_cypripedii:0.01642)1.000:0.01876,((P_sp_GM01:0.03275,(P_rodasii:0.02553,P_rwandensis:0.01735)1.000:0.01620)0.999:0.01050,(P_e…					(((P_sp_At-9b:0.01486,P_cypripedii:0.01584)1.000:0.02141,((P_sp_GM01:0.02878,(P_rodasii:0.03447,P_rwandensis:0.01394)1.000:0.02022)1.000:0.01391,(P_dispersa:0.02250,(P_eucrina:0.05220,P_wallisii:0.03279)0.221:0.00583)1.000:0.01006)1.000:0.01680)1.000:0.02286,(P_sp_A4:0.08862,((T_morbirosei:0.07160,(T_sp_NML_06:0.08635,T_ptyseos:0.05995)1.000:0.03147)1.000:0.11176,(E_billingiae:0.07569,(E_tasmanie…					(P_agglomerans:0.00760,P_sp_aB:0.01095,(P_vagans:0.00707,(((((P_s_indologenes:0.00164,P_s_stewartii:0.00140)1.000:0.01444,(P_allii:0.01036,P_ananatis:0.01055)0.999:0.00762)1.000:0.03109,(P_septica:0.04463,((P_sp_A4:0.07678,((T_morbirosei:0.06777,(T_sp_NML_06:0.07664,T_ptyseos:0.05124)1.000:0.02437)1.000:0.11417,(E_billingiae:0.05931,(E_tasmaniensis:0.02170,E_pyrifoliae:0.02186)1.000:0.05306)1.000…					((P_sp_GM01:0.03399,(P_rodasii:0.02215,P_rwandensis:0.02219)1.000:0.02081)0.982:0.00998,((P_sp_At-9b:0.02181,P_cypripedii:0.02251)1.000:0.02827,((P_sp_A4:0.11664,((T_morbirosei:0.08288,(T_sp_NML_06:0.10683,T_ptyseos:0.07952)1.000:0.04325)1.000:0.16355,(E_billingiae:0.08425,(E_tasmaniensis:0.03081,E_pyrifoliae:0.04146)1.000:0.08228)1.000:0.07992)1.000:0.03447)0.906:0.01673,(P_septica:0.06928,(((P_…

## Sheet: 50 genes
Supplementary File S7.2 Randomised gene subset datasets constructed with 50 genes
Dataset 1					Dataset 2					Dataset 3					Dataset 4					Dataset 5					Dataset 6					Dataset 7					Dataset 8					Dataset 9					Dataset 10
FILE	START POSITION SUPERMATRIX	END POSITION SUPERMATRIX			FILE	START POSITION SUPERMATRIX	END POSITION SUPERMATRIX			FILE	START POSITION SUPERMATRIX	END POSITION SUPERMATRIX			FILE	START POSITION SUPERMATRIX	END POSITION SUPERMATRIX			FILE	START POSITION SUPERMATRIX	END POSITION SUPERMATRIX			FILE	START POSITION SUPERMATRIX	END POSITION SUPERMATRIX			FILE	START POSITION SUPERMATRIX	END POSITION SUPERMATRIX			FILE	START POSITION SUPERMATRIX	END POSITION SUPERMATRIX			FILE	START POSITION SUPERMATRIX	END POSITION SUPERMATRIX			FILE	START POSITION SUPERMATRIX	END POSITION SUPERMATRIX
gene432	1	184			gene826	1	193			gene1246	1	103			gene1254	1	64			gene479	1	180			gene699	1	786			gene694	1	223			gene688	1	338			gene219	1	275			gene1003	8772	8870
gene611	185	702			gene3	194	708			gene1077	104	492			gene95	65	445			gene1077	181	569			gene527	787	884			gene460	224	373			gene568	339	860			gene296	276	1146			gene1024	8506	8771
gene1098	703	1009			gene36	709	1133			gene1013	493	818			gene181	446	761			gene1355	570	1198			gene1078	885	1390			gene238	374	690			gene11	861	1317			gene774	1147	1246			gene103	2839	3577
gene99	1010	1291			gene1285	1134	1391			gene1019	819	938			gene1	762	908			gene834	1199	1568			gene1019	1391	1510			gene1344	691	1155			gene212	1318	1422			gene1131	1247	1740			gene1042	12430	12905
gene317	1292	1542			gene586	1392	1732			gene522	939	1353			gene885	909	1110			gene930	1569	1909			gene1259	1511	1712			gene12	1156	1628			gene1005	1423	1582			gene558	1741	1832			gene1043	181	482
gene170	1543	1639			gene961	1733	1950			gene320	1354	2165			gene706	1111	1367			gene917	1910	2073			gene899	1713	1932			gene224	1629	1872			gene307	1583	1697			gene1326	1833	2040			gene1079	6895	7475
gene1259	1640	1841			gene198	1951	2128			gene1303	2166	2374			gene930	1368	1708			gene597	2074	2309			gene674	1933	2071			gene1285	1873	2130			gene802	1698	1911			gene966	2041	2528			gene1108	12246	12429
gene311	1842	2124			gene1027	2129	2664			gene659	2375	2586			gene601	1709	1932			gene1192	2310	2522			gene9	2072	2320			gene536	2131	3626			gene5	1912	2121			gene802	2529	2742			gene1124	9207	9451
gene143	2125	2713			gene1301	2665	3315			gene752	2587	2874			gene468	1933	2047			gene1336	2523	3101			gene738	2321	2417			gene539	3627	4024			gene838	2122	2368			gene58	2743	3027			gene1143	10116	10507
gene387	2714	2793			gene104	3316	3634			gene778	2875	3365			gene1011	2048	2906			gene1253	3102	3291			gene1045	2418	2997			gene1100	4025	4408			gene279	2369	2652			gene1230	3028	3193			gene1186	9516	9698
gene1100	2794	3177			gene103	3635	4373			gene525	3366	3601			gene387	2907	2986			gene185	3292	3736			gene185	2998	3442			gene544	4409	5126			gene1277	2653	3368			gene778	3194	3684			gene121	13086	13585
gene961	3178	3395			gene920	4374	4593			gene140	3602	3927			gene1193	2987	3116			gene83	3737	4228			gene433	3443	3904			gene1184	5127	5367			gene1176	3369	3596			gene1170	3685	3769			gene1258	3781	4048
gene873	3396	3495			gene702	4594	4701			gene142	3928	4379			gene535	3117	3365			gene577	4229	4756			gene838	3905	4151			gene701	5368	5440			gene439	3597	3669			gene1275	3770	4197			gene1264	13668	13877
gene1184	3496	3736			gene394	4702	4810			gene25	4380	4506			gene1230	3366	3531			gene425	4757	5218			gene807	4152	4456			gene279	5441	5724			gene2	3670	4155			gene217	4198	4425			gene1310	11257	11403
gene702	3737	3844			gene1275	4811	5238			gene523	4507	4867			gene638	3532	3685			gene377	5219	5600			gene552	4457	4818			gene377	5725	6106			gene394	4156	4264			gene1352	4426	4697			gene153	8343	8505
gene1207	3845	4191			gene465	5239	5484			gene852	4868	5271			gene283	3686	3878			gene1056	5601	5885			gene874	4819	5002			gene978	6107	6541			gene386	4265	4563			gene13	4698	5046			gene155	4049	4402
gene139	4192	4722			gene1217	5485	5692			gene609	5272	5353			gene13	3879	4227			gene1095	5886	6096			gene305	5003	5241			gene1296	6542	6656			gene1292	4564	5009			gene785	5047	5194			gene19	8871	9206
gene990	4723	4965			gene852	5693	6096			gene588	5354	5620			gene609	4228	4309			gene139	6097	6627			gene1308	5242	5640			gene383	6657	6795			gene721	5010	5188			gene588	5195	5461			gene199	9699	10033
gene773	4966	5086			gene210	6097	6192			gene210	5621	5716			gene291	4310	4760			gene898	6628	6934			gene563	5641	6116			gene319	6796	7245			gene1089	5189	5580			gene1053	5462	5726			gene232	8047	8342
gene746	5087	5529			gene444	6193	6564			gene149	5717	6066			gene938	4761	4987			gene506	6935	7705			gene613	6117	6210			gene968	7246	8061			gene106	5581	5893			gene1004	5727	5870			gene258	1629	1854
gene116	5530	6074			gene1263	6565	6716			gene1055	6067	6257			gene968	4988	5803			gene1217	7706	7913			gene111	6211	6534			gene56	8062	8397			gene570	5894	5994			gene676	5871	6190			gene26	11404	11690
gene928	6075	6548			gene861	6717	6932			gene14	6258	6726			gene874	5804	5987			gene736	7914	8555			gene1299	6535	6876			gene294	8398	9044			gene116	5995	6539			gene1031	6191	6550			gene291	5970	6420
gene1082	6549	6748			gene76	6933	7300			gene1338	6727	6974			gene1308	5988	6386			gene134	8556	8911			gene396	6877	7546			gene1082	9045	9244			gene580	6540	6712			gene421	6551	6679			gene337	5323	5477
gene341	6749	6812			gene50	7301	7641			gene1322	6975	7281			gene1014	6387	6660			gene1341	8912	9254			gene67	7547	8357			gene796	9245	9506			gene749	6713	6890			gene327	6680	6810			gene341	9452	9515
gene592	6813	7163			gene939	7642	7937			gene147	7282	7485			gene169	6661	6914			gene1133	9255	9515			gene276	8358	8765			gene330	9507	9640			gene1014	6891	7164			gene1302	6811	6901			gene362	783	883
gene723	7164	7492			gene600	7938	8436			gene780	7486	7809			gene797	6915	7446			gene1306	9516	9712			gene1283	8766	8933			gene1346	9641	10105			gene76	7165	7532			gene757	6902	7545			gene369	10508	10919
gene148	7493	7665			gene67	8437	9247			gene1057	7810	8284			gene1302	7447	7537			gene803	9713	10031			gene777	8934	9425			gene345	10106	10327			gene796	7533	7794			gene67	7546	8356			gene381	14271	14422
gene541	7666	8073			gene1157	9248	9336			gene39	8285	8608			gene1124	7538	7782			gene364	10032	10308			gene132	9426	10832			gene1242	10328	10600			gene575	7795	8045			gene657	8357	8568			gene479	1	180
gene498	8074	8229			gene953	9337	9680			gene63	8609	8969			gene1282	7783	8021			gene1282	10309	10547			gene1323	10833	11521			gene606	10601	10681			gene606	8046	8126			gene1135	8569	8709			gene501	11691	11823
gene82	8230	8845			gene448	9681	10023			gene138	8970	9398			gene490	8022	8379			gene186	10548	11406			gene1327	11522	11847			gene685	10682	11571			gene357	8127	8545			gene385	8710	9342			gene526	7476	8046
gene1129	8846	8986			gene461	10024	10199			gene267	9399	9561			gene1157	8380	8468			gene1300	11407	11628			gene494	11848	12175			gene403	11572	11995			gene403	8546	8969			gene926	9343	9604			gene528	2251	2838
gene507	8987	9167			gene869	10200	10751			gene759	9562	9643			gene239	8469	8704			gene227	11629	12183			gene1150	12176	12486			gene454	11996	12473			gene1209	8970	9174			gene729	9605	9939			gene537	11824	12006
gene367	9168	9265			gene132	10752	12158			gene385	9644	10276			gene108	8705	8911			gene747	12184	12720			gene937	12487	12653			gene164	12474	13072			gene518	9175	9384			gene287	9940	10186			gene557	1855	2250
gene85	9266	9759			gene1323	12159	12847			gene74	10277	10494			gene101	8912	9217			gene369	12721	13132			gene760	12654	13114			gene288	13073	13471			gene385	9385	10017			gene521	10187	10616			gene599	13878	14181
gene151	9760	10086			gene636	12848	13642			gene287	10495	10741			gene771	9218	10100			gene711	13133	13416			gene712	13115	13473			gene31	13472	13700			gene608	10018	10236			gene1141	10617	10968			gene632	483	782
gene914	10087	10239			gene926	13643	13904			gene26	10742	11028			gene995	10101	10256			gene879	13417	13587			gene221	13474	13936			gene818	13701	14172			gene1086	10237	10365			gene343	10969	11247			gene719	12007	12245
gene612	10240	10437			gene79	13905	14453			gene336	11029	11274			gene1007	10257	10368			gene1208	13588	13935			gene870	13937	14423			gene237	14173	14603			gene821	10366	10702			gene1032	11248	11412			gene751	14423	14531
gene184	10438	10771			gene790	14454	14707			gene931	11275	11355			gene768	10369	10604			gene31	13936	14164			gene438	14424	14492			gene456	14604	15158			gene278	10703	11194			gene261	11413	11813			gene759	10034	10115
gene187	10772	11016			gene164	14708	15306			gene800	11356	11652			gene513	10605	10723			gene492	14165	14845			gene610	14493	14855			gene268	15159	15495			gene827	11195	11407			gene829	11814	12260			gene791	3578	3780
gene1158	11017	11334			gene698	15307	15637			gene1345	11653	11791			gene878	10724	11171			gene184	14846	15179			gene626	14856	15132			gene669	15496	15595			gene855	11408	11502			gene808	12261	12390			gene809	5478	5969
gene700	11335	12002			gene937	15638	15804			gene1188	11792	11881			gene1140	11172	11311			gene1010	15180	15631			gene24	15133	15386			gene261	15596	15996			gene1072	11503	11854			gene1264	12391	12600			gene821	10920	11256
gene500	12003	12239			gene1074	15805	16392			gene97	11882	12221			gene373	11312	11752			gene545	15632	16273			gene629	15387	15626			gene64	15997	16341			gene823	11855	12585			gene100	12601	12836			gene833	5015	5322
gene1287	12240	12491			gene949	16393	16767			gene829	12222	12668			gene1118	11753	12010			gene1191	16274	16470			gene1264	15627	15836			gene1042	16342	16817			gene261	12586	12986			gene150	12837	12947			gene857	1145	1219
gene52	12492	12843			gene159	16768	16931			gene848	12669	13080			gene15	12011	12617			gene973	16471	16843			gene360	15837	15961			gene1168	16818	17306			gene434	12987	13056			gene1151	12948	13123			gene867	14182	14270
gene1262	12844	13135			gene1054	16932	17042			gene560	13081	13299			gene867	12618	12706			gene1266	16844	17083			gene754	15962	16343			gene918	17307	17388			gene1030	13057	13234			gene784	13124	13370			gene872	4403	5014
gene582	13136	13452			gene28	17043	17240			gene1130	13300	13511			gene1224	12707	12834			gene1142	17084	17698			gene779	16344	16672			gene621	17389	17753			gene447	13235	13339			gene353	13371	13633			gene875	12906	13085
gene98	13453	14308			gene332	17241	17457			gene1065	13512	14206			gene480	12835	13112			gene878	17699	18146			gene776	16673	17116			gene548	17754	17955			gene44	13340	13612			gene849	13634	13823			gene904	1220	1628
gene1047	14309	14430			gene787	17458	17747			gene208	14207	14514			gene1274	13113	13311			gene511	18147	18562			gene34	17117	17278			gene365	17956	18114			gene776	13613	14056			gene767	13824	14508			gene918	13586	13667
gene211	14431	14563			gene549	17748	17919			gene1224	14515	14642			gene1318	13312	13755			gene635	18563	18745			gene235	17279	18098			gene776	18115	18558			gene849	14057	14246			gene135	14509	14731			gene928	6421	6894
gene572	14564	14890			gene452	17920	18079			gene1229	14643	14701			gene476	13756	13983			gene40	18746	19059			gene40	18099	18412			gene380	18559	18880			gene722	14247	14411			gene587	14732	14942			gene981	884	1144
Data matrix					Data matrix					Data matrix					Data matrix					Data matrix					Data matrix					Data matrix					Data matrix					Data matrix					Data matrix
>P_brenneri					>P_brenneri					>P_brenneri					>P_brenneri					>P_brenneri					>P_brenneri					>P_brenneri					>P_brenneri					>P_brenneri					>P_brenneri
--------------------MVTFQTNHGDIVIKTFDDKAPATVKNFLDYCREGFYDNTIFHRVINGFMIQGGGFEPGMKQKATKDEIQNEANNGLKNTKGTLAMARTSAPHSATAQFFINVADNDFLNFRDESVQGWGYCVFAEVVEGMDVVEKIKGVSTGRSGMHQDVPKDDVIIQKVTVSE-MLLSSTRKDW---------LGN-------VRGDVLAGIVVALALIPEAIAFSIIAGVDPQVGLYSAFCIP					MRLCDRDIEAWLDNGKLAIEPRPPVERINGATVDVRLGNQFRTFSGHTAAYIDLSGPKHEVSAALDRVMSDEIVLPDGEAFFLHPGELALAVTLESVTLPDDLVGWLDGRSSLARLGLMVHVTAHRIDPGWQGRIVLEFYNSGKLPLALRPGMLIGALSFEPLSGPAARPYNRREDAKYRGQQGADASRIDKD---------------VIMAQPHLLAERISRLSNALEKGLYERHHAIRLCLLAALSGESVFLLGPPGIAKSLIARRLKYAFQHARAFEYLMTRFSTPEEVFGPLSIQALKDEGRYQRLTKGYLPDAEIVFLDEIWKAGPAILNTLLTAINERRFRNGDSEEKIPMRLLVTASNELPEADSGLEALYDRMLIRLWLDNVHEKQNFRSM…					MQNQRIRIRLKAFDHRLIDQSTAEIVETAKRTGAQVRGPIPLPTRKERFTVLISPHVNKDARDQYEIRTHKRLVDIVEPTEKTVDALMRLDLAAGVDVQISLGMPVALLALALSAFAIGTTEFVIMGLLPDVAADLQVSIPSAGWLISGYALGVAIGAPIMALLTARLPRKKTLTLLMVIFIVGNLLCALAYNYNLLMLARIVTALCHGAFFGIGAVVAASLVAPGRQASAVALMFTGLTLANVLGVPLGTWFGQLFGWRATFWGVAVIGVLAFIALIVSLPNNKQEKPVDLASEVSALANGKLWLSLLMTVFFAAAMFALFSYIAPLLLQVTGISDRGVSWTLFLIGAGLTVGNILGGKMADWKVSFSLILSFSLIAIFSLLFSWTSHALWLAEITLF…					MRKRFIAGATCPHCQEKDTLAMWRENNVDVVECVKCGHQMREADKQARDQVRTNEQVIGIFHPE---------------------------------------------------------------------------------------------------------------------------VISGNDVRSWLLAQADYLVKLAGRKLWSDQDVTTAAALLKSADASLADMNDPSVMNVRRALTQDISTLSSVSQVDYDGVILKLNQLSNNVDNLRLADNDSDDAPMDSDGGELSGSVREWRQNLVKSWHNFMDDFITIRRRDNTAQPLLAPNQDVYLRENIRSRLLIAAQAVPRHQDEIYKQSIDTVSAWVRAWYDTNDAATKAFLAQLDELS…					MQLNKVLKGLMLALPVLAVAACSSHKNNNNDQT-GMGA-DGAY--GANSGMNGN-GGNMSSDEQARLQMQQLQQNNIVYFGLDKYDVQSDYAQMLDQHAAFLRSNPSYKVTIEGHADERGTPEYNIALGERRASAVKMYLQGKGVSADQMSIVSYGKEKPAVLGHDEAAYSKNRRAVLVYMPVALLALALSAFAIGTTEFVIMGLLPDVAADLQVSIPSAGWLISGYALGVAIGAPIMALLTARLPRKKTLTLLMVIFIVGNLLCALAYNYNLLMLARIVTALCHGAFFGIGAVVAASLVAPGRQASAVALMFTGLTLANVLGVPLGTWFGQLFGWRATFWGVAVIGVLAFIALIVSLPNNKQEKPVDLASEVSALANGKLWLSLLMTVFFAAAMFALF…					-MKFKRQ---IKPYRAAAGGWGSLEATTRFVLDSKAALKNMRNLMRMNKARGFDCPGCAWGD-DNKSTFSFCENGAKAVTWEATRRVVDSEFFARHSVTTLYTQSDYFLEYQGRLTHPLRYNAETDHYEPISWDDAFALIARHIKAMDNPDQMELYTSGRASNEASWLYQLFGRLMGTNNFPDCSNMCHEASGTGLKRSIGVGKGTIRLDDFDHADAIFVFGQNPGTNHPRMLHSLRHAADHGAKIVTFNTLRER					MGIFSRFADIVNANINSLLERAEDPQKLVRLMIQEMEDTLVEVRSTSARALAEKKQLTRRIEQAEIQQAEWQEKAELALRKDKDDLARSALIEKQKLTDLIAALKQEVSQVEETLERMKGEISELEKKLSETRARQQALTLRHQAASSSRDVRRQLDSGKIDEAMARFESFERRINHMEAEAESHGFGKPKTLDQQFTDLKADDEISQQLNALKAKMNRSE--MTDNNTALKKAGLKVTLPRLKILEVLQ--EPECHHVSAEDLYKRLIDIGEEIGLATVYRVLNQFDDAGIVTRHNFEGGKSVFELTQQHHHDHLICLDCGKVIEFSDESIETRQREIATRHGIKLTNHSLYLYGHCALGDCREDETLHDQ-MTDKLTSLRQLTTVVADTGDIAAMKL…					-------------------------------VTSSKEQYNFNKLQKRLRRHVGEAIADFNMIEEGDRIMVCLSGGKDSYTMLEILRSLQKSAPVNFSLIAVNLDQKQPGFPEHILPEYLASQGVEYRIIEEDTYSIVKDKIPEGKTTCSLCSRLRRGILYRAASDLGCTKIALGHHRDDILQTLFLNMFYGGKMKGMPPKLMSDDGKHIVIRPLAYCREKDIIRFSEARQFPIIPCNLCGSQPNLQRQVVADMLR					--MRFIDTHCHFDFPPFEGDTVASLARAAAAGVEKIIIPAIDASRFSRVCELAAGHAALYAALGLHPIAIEAHQEA-HLDRLEEKLKQRPRKLVAIGEIGLDLYRDD--PQFDKQQRFLDAQLKLAKRYDLPVILHSRRTHDKLAQHLRRHDLPRRGVVHGFAGSLQQAQAFIKLGYAIGVGGTITYERASKTRQTLAQLPLSSLLLETDAPDMPLKGFQGQPNRPERARQVWETLCTLRDEPPEVIAGALWRNS					MQLNKVLKGLMLALPVLAVAACSSHKNNNNDQT-GMGA-DGAY--GANSGMNGN-GGNMSSDEQARLQMQQLQQNNIVYFGLDKYDVQSDYAQMLDQHAAFLRSNPSYKVTIEGHADERGTPEYNIALGERRASAVKMYLQGKGVSADQMSIVSYGKEKPAVLGHDEAAYSKNRRAVLVYMDQKRLTHLRQLEAESIHIIREVAAEFSNPVMMYSIGKDSSVMLHLARKAFYPGTLPFPLLHVDTGWKFREMYEFRDRTVKAMGAELLVHRNPEGVAMGINPFVHGSAKHTDIMKTEGLKQALNKYGFDAAFGGARRDEEKSRAKERIYSFRDRFHRWDPKNQRPELWHNYNGQINKGESIRVFPLSNWTELDIWQYIFLENIEIVPLYLAAPRPVLER…
>P_dispersa					>P_dispersa					>P_dispersa					>P_dispersa					>P_dispersa					>P_dispersa					>P_dispersa					>P_dispersa					>P_dispersa					>P_dispersa
--------------------MVTFQTNHGDIVIKTFDDKAPATVQNFLDYCREGFYDNTIFHRVINGFMIQGGGFEPGMKQKATKADIRNEANNGLKNTKGTLAMARTQAPHSATAQFFINVADNDFLNFRDESLQGWGYCVFAEVVEGMDVVEKIKAVKTGRSGMHQDVPVDDVIIQKVTVSE-MSQTADRPAA---TASDITVARVLRSPSLFTRECLAGVITALALIPEVISFSVIAGVDPKVSLVASVVLC					MRLCDRDIESWLDSGKLAIDPRPPVERINGATVDVRLGNQFRTFSGHTAPFIDLSGPKHEVSAALDRVMSDEIVLPEGEAFFLHPGELALAVTLESVTIPDDLVGWLDGRSSLARLGLMVHVTAHRIDPGWQGRIVLEFYNSGKLPLALRPGMLIGALSFEPLSGPAARPYNRREDAKYRGQQGADASRIDKD-----------------MAQPHLLAERISRLSNALEKGLYERHHAIRLCLLAALSGESVFLLGPPGIAKSLIARRLKYAFQHARAFEYLMTRFSTPEEVFGPLSIQALKDEGRYQRLTKGYLPDAEIVFLDEIWKAGPAILNTLLTAINERRFRNGDSEEPIPMRLLVTASNELPEADSGLEALYDRMLIRLWLDNVHEKQNFRSM…					MSNQRIRIRLKAFDHRLIDQSTAEIVETAKRTGAQVRGPIPLPTRKERFTVLISPHVNKDARDQYEIRTHKRLVDIVEPTEKTVDALMRLDLAAGVDVQISLGMPVALLALALSAFAIGTTEFVIMGLLPEVAGDLQVSIPSAGWLISGYALGVAIGAPIMALLTAKLPRKRTLILLMIIFIIGNVLCALAYTYNLLMLARVITALCHGAFFGIGSVVAASLVAPSRQASAVALMFTGLTLANVLGVPLGTWFGQLFGWRATFWGVAIIGILAFIALIVSLPTNKDEKPVHLASEISALANGKLWLSLLMTVCFAAAMFALFSYIAPLLLQVTGISDRGVSWTLFLIGAGLTVGNIVGGKLADWKVSFSLILSFSLIAVFSLLFSWTSHALWLAEITLF…					MRKRFIAGAVCPHCQEKDTLAMWRENNVDVVECVKCGHQMREADKQARDQVRSTEQVIGIFHPEMTEQKDSSAMVEETTPA-DTSPTPASQPPRAKKSDGKVLSAVAIVIALAIGAGLYLNGKHQADLQAQTNQNLSEQLSALQQQLGSDKQQLSQQLADANTALQEARSQQDNSAKELETLREKVATISGNDTRTWLLAQADYLVKLAGRKLWSDQDVTTAAALLKSADSSLAEMNDPSIMNVRRALTQDISSLAAVSQVDYDGIILKLNQLSNGVDNLRLADNDSDESPMDADSGELSSSLHEWRQNLVKSWHNFMDDFITIRRRDNTAQPLLAPNQDVYLRENIRSRLLIAAQAVPRHQDEIYKQSIDAVSTWVRAWYDTNDAATKAFLAQLDELS…					MQLNKVLKGLMLALPVIAVAACSSHKNNNNDQT-GMGA-DGAY--GAGAGQN----GNMSSDEQARLQMQQLQQNNIVYFGLDKYDVQSEYAQMLDQHAAFLRSNPSYKVTIEGHADERGTPEYNIALGERRANAVKMYLQGKGVSADQMSIVSYGKEKPAVLGHDEAAYAKNRRAVLVYMPVALLALALSAFAIGTTEFVIMGLLPEVAGDLQVSIPSAGWLISGYALGVAIGAPIMALLTAKLPRKRTLILLMIIFIIGNVLCALAYTYNLLMLARVITALCHGAFFGIGSVVAASLVAPSRQASAVALMFTGLTLANVLGVPLGTWFGQLFGWRATFWGVAIIGILAFIALIVSLPTNKDEKPVHLASEISALANGKLWLSLLMTVCFAAAMFALF…					-MKFKRK---IQPYRAAAGGWGSLEATTRFVLDSKAALKNMRNLMRMNKARGFDCPGCAWGD-DNKSTFSFCENGAKAVTWEATRRVVEPEFFAQHSVSTLYQQSDYFLEYQGRLTHPMRYNSATDHYEPISWDDAFALIAQHLQAMDHPDQLELYTSGRASNEASWLYQLFGRVLGTNNFPDCSNMCHEASGTGLKRSIGVGKGTIRLDDFDHADAIFVFGQNPGTNHPRMLHSLRHAADHGARIVTFNTLRER					MGIFSRFADIVNANINSLLERAEDPQKLVRLMIQEMEDTLVEVRSTSARALAEKKQLLRRIEQAETQQAEWQEKAELALSKEKEDLARSALIEKQKLTDLIAALQQEASHVEETLDRMKGEIGELEKKLSETRARQQALTLRHQAASSSRDVRRQLDSGKLDEAMARFESFERRIDHMEAEAESQRFGKSKTLDQQFADLKADDEISQQLAALKAKMNRSE--MTDNNSALKKAGLKVTLPRLKILEVLQGPGPESHHVSAEDLYKRLIDMGEEIGLATVYRVLNQFDDAGIVTRHNFEGGKSVFELTQQHHHDHLICLDCGKVIEFSDESIETRQREIATRHGIKLSNHSLYLYGHCALGDCREDETLHDQ-MTDKLTSLRQLTTVVADTGDIAAMKL…					--------------------------MSEHQEVNKKEQYNLNKLQKRLRRNVGEAIADFNMIEEGDRIMVCLSGGKDSYTMLEILRNLQQSAPVNFSLVAVNLDQKQPGFPAHVLPAYLDTLGVEYQIVNEDTYSIVKEKIPEGKTTCSLCSRLRRGILYRTATELGCTKIALGHHRDDILQTLFLNMFYGGKMKGMPPKLMSDDGKHIVIRPLAYCREKDIVRFAEARQYPIIPCNLCGSQPNLQRQVVADMLR					--MRFIDTHCHFDFPPFVTAAEQSIAQAAQAGVERIIVPCVDASRFAVVSQLAQQHPALYSALGLHPINIAQHQDD-DLDRLEQYLQTPDVKRVAIGEIGLDLYMEA--PDFARQTRLLEAQLKLARRYDLPVILHSRRTHDQLAQHLRRHDVPRRGVVHGFAGSQQQAERFIALGYAIGVGGTITYTRASKTRHTIASLPLQALLLETDAPDMPLHGFQGQPNRPERARNVFEVLCQLRPEPPDEIADALWHNS					MQLNKVLKGLMLALPVIAVAACSSHKNNNNDQT-GMGA-DGAY--GAGAGQN----GNMSSDEQARLQMQQLQQNNIVYFGLDKYDVQSEYAQMLDQHAAFLRSNPSYKVTIEGHADERGTPEYNIALGERRANAVKMYLQGKGVSADQMSIVSYGKEKPAVLGHDEAAYAKNRRAVLVYMDQNRLTHLRQLEAESIHIIREVAAEFSNPVMMYSIGKDSSVMLHLARKAFYPGTLPFPLLHVDTGWKFREMYEFRDRTVKAMGAELLVHRNPEGVAMGINPFVHGSAKHTDIMKTEGLKQALNKYGFDAAFGGARRDEEKSRAKERIYSFRDRFHRWDPKNQRPELWHNYNGQINKGESIRVFPLSNWTELDIWQYIFLENIEIVPLYLAAPRPVLER…
>E_tasmaniensis					>E_tasmaniensis					>E_tasmaniensis					>E_tasmaniensis					>E_tasmaniensis					>E_tasmaniensis					>E_tasmaniensis					>E_tasmaniensis					>E_tasmaniensis					>E_tasmaniensis
--------------------MVTFQTNHGDIVIKTFDDKAPATVKNFLEYCREGFYDNTIFHRVINGFMVQGGGFEPGMKQKDTKDEIRNEASNGLKNTKGTLAMARTQAPHSATAQFFINVADNDFLNFRDESLQGWGYCVFAEVVEGMDVVEKIKAVSTGRSGMHQDVPKDDVIIQKVTVSEMFNLKNLRASD-------------------VKNDVLAGAVVSVALIPEATAFSLLAGLSPTIGLHTAFILG					MRLCDRDIEAWLDNGKLGIDPRPPVERINGATVDVRLGNQFRTFRGHTAAFIDLSGPKAEVSAALDRVMSDEIVLPEGDAFFLHPGELALAVTLESVTLPDDLVGWLDGRSSLARLGLMVHVTAHRIDPGWQGRIVLEFYNSGKLPLALRPGMLIGALSFEPLSGPAARPYNSRQDAKYKGQQGAVASRIDKD-----------------MAHSQLLAERISRLSNALEKGLYERHHAIRLCLLAALCGESVFLLGPPGIAKSLIARRLKFAFQHARAFEYLMTRFSTPEEVFGPLSIQALKDEGRYQRLTKGYLPDAEIVFLDEIWKAGPAILNTLLTAINERRFRNGDSEEKIPMRLLVTASNELPEADSGLEALYDRMLIRLWLDNVHEKQNFRSL…					MQNQRIRIRLKAFDHRLIDQSTAEIVETAKRTGAQVRGPIPLPTRKERFTVLISPHVNKDARDQYEIRTHKRLVDIVEPTEKTVDALMRLDLAAGVDVQISLGMPVSLLALALSAFAIGTTEFVIMGLLPEVANDLQVSLPSAGWLISGYALGVAIGAPIMALLTARLPRKGTLMLLMAIFIVGNIFCALAYNYNLLMLARVVTALCHGAFFGIGAVVAASLVAPGRQASAVALMFTGLTLANVLGVPLGTWFGQMFGWRATFWGVAAIGVLAIIGLIASLPTNRNEKPIHLASEVGALNNGRLWLSLLMTVFFAAAMFALFSYIAPLLLEVTGISKRGVSWTLFLIGAGLTVGNILGGRLADWKVSFSLILCFSLIALFSLLFSWTSHSLWLAEITLF…					MRKRFIAGAVCPKCQAKDTLALWRENNVDVVECVKCGHQMREADKQAREQVRSHEQVIGIFHPEMTEHKDSSAMVEETTPAVET-SAAEPQQPSQGGRSGTVLGAVAIAIALAVGAGLYMYGKHQAQLQAETNQSLAAQLSGLQKQSANDKQSLVEKLTAQTGALDTARQQQAVLNQQLDELKQKVATISGSDAQTWMLAQADYLVKMAGRKLWNDRDVTSAAALLKSADASLADMNDPSLIGARRALAQDISTLSALSQVDYDGVILKLNQLSNGIDNLRLADNTSDDEPMDADSGALSSSLREWRQNLVKSWHNFMDDFITIRRRDATAEPLLAPNQDVYLRENIRSRLLIAAQAVPRHQDEIYKQSIDTVSAWIRAWYDTSDANTKAYLSQLDDLS…					MQLNKVLKGLMLALPVIAVAACSSHKNNNNDQTNGMGL-DGSA----NGGMN---SGNMSSDEQARLQMQELQKNNIVYFGLDKYDIQSDFAQMLDAHATFLRSNPSYKVTVEGHADERGTPEYNIALGERRSSAVKMYLQGKGVAEDQISIVSYGKEKPAVLGHDESAYAKNRRAVLVYMPVSLLALALSAFAIGTTEFVIMGLLPEVANDLQVSLPSAGWLISGYALGVAIGAPIMALLTARLPRKGTLMLLMAIFIVGNIFCALAYNYNLLMLARVVTALCHGAFFGIGAVVAASLVAPGRQASAVALMFTGLTLANVLGVPLGTWFGQMFGWRATFWGVAAIGVLAIIGLIASLPTNRNEKPIHLASEVGALNNGRLWLSLLMTVFFAAAMFALF…					-MKFKQA---IKPYQAAAGGWGSLEATTRFVFDSKEVLKNMRNLMRMNKAKGFDCPGCAWGD-DNKSTFSFCENGAKAVTWEATRRHIGAEFFAQYSVSALYQQSDYFLEYQGRLTEPLRYNRATDRYEPIGWQEAFELIASHIKAMDNPDQMELYTSGRASNEASWLYQLFGRMNGSNNFPDCSNMCHEASGTGLKRSIGVGKGTIRLDDFDHANAIFVFGQNPGTNHPRMLHSLRHAADHGAKIVTFNTLRER					MGIFSRFADIVNANINSLLEKAEDPQKLVRLMIQEMEDTLVELRSTSARALAEKKQLLRRTGQAESQQSEWQHKAELALYKEKEDLARAALMEKQKLTDLIAALQQEASQVEESLTRLKGEIGELENKLAETRARQQALTLRHQAASTSRDVRRQLDSGKLDEAMARFESFERRIDHMEAEAESQSFGKQKNLDRQFAELQADDEISKQLAALKAKLNRNDSEMTDNNTALKKAGLKVTLPRLKILEVLQ--EPEGHHVSAEDLYKRLIDMGEEIGLATVYRVLNQFDDAGIVTRHNFEGGKSVFELTQQQHHDHLICLDCGKVIEFSDESIESRQRDIATRHGIKLSNHSLYLYGHCALGDCREDETLHDK-MTDKLSSLRQVTTVVADTGDIAAMER…					--------------------------MQSNQENSKKGQYNLNKLQKRLRRNVGEAIADFNMIEEGDRIMVCLSGGKDSYTMLEILRNLQQSAPISFSLVAVNLDQKQPGFPAHILPEYLEQQGVEYKIVDEDTYSIVKEKIPEGKTTCSLCSRLRRGILYRTASELGCTKIALGHHRDDILQTLFLNMFYGGKMKGMPPKLMSDDGQHIVIRPLAYCREKDIERFAIARQYPIIPCNLCGSQPNLQRQVIGDMLR					MTLCFVDTHCHFDFPPFVGDEEASLARAAHAGVEKIIAVGVSAPRFAGVMAQAERHPAVYAALGLHPMAVAEHNEQ-SLAALEQQLRRRHPKLVAIGEIGLDLYIDN--PQFARQQALLEAQLRLARDYALPVILHSRRTHDKLAQQLRRIDLPRRGVVHGFAGSEQQALAFIRAGYAIGVGGTISYERASKTRQAIARLPLTSLLLETDAPDMPLQGFQGQPNRPERVKDVWHALCALRDESPQHIAETLRENTRALFDV--------------------VLEEYRKHVAERAAQGIVPKPLDASQMAALVELLKAPPAGEEEFLSDLLINRVPPGVDEAAYVKAGFLAAVTKGEATSPLVTPEKAIKLLGTMQGGYNIHALIDALDNDKLAPLAAES…					MQLNKVLKGLMLALPVIAVAACSSHKNNNNDQTNGMGL-DGSA----NGGMN---SGNMSSDEQARLQMQELQKNNIVYFGLDKYDIQSDFAQMLDAHATFLRSNPSYKVTVEGHADERGTPEYNIALGERRSSAVKMYLQGKGVAEDQISIVSYGKEKPAVLGHDESAYAKNRRAVLVYMDQQRLTHLRQLEAESIHIIREVAAEFANPVMMYSIGKDSSVMLHLARKAFYPGTLPFPLLHVDTGWKFREMYEFRDRMVKNIGAELLVHRNPEGLAMGINPFVHGSAKHTDIMKTEGLKQALDKYGFDAAFGGARRDEEKSRAKERIYSFRDRFHRWDPKNQRPELWHNYNGQVNKGESIRVFPLSNWTELDIWQYIFLENIEIVPLYLAAPRPVLER…
>P_rodasii					>P_rodasii					>P_rodasii					>P_rodasii					>P_rodasii					>P_rodasii					>P_rodasii					>P_rodasii					>P_rodasii					>P_rodasii
--------------------MVTFQTNHGDIVIKTFDDKAPATVKNFLDYCREGFYDNTIFHRVINGFMVQGGGFEPGMKQKDTKEDIRNEANNGVKNTKGTLAMARTQAPHSATAQFFINVADNDFLNFRDESLQGWGYCVFAEVVEGMDVVEKIKAVKTGRSGMHQDVPVDDVVIQKVTVSV-MSKSPDHAPE----ANDITVGSVLRSPALLTRECLAGVITALALIPEVISFSVIAGVDPKVSLVASVVLC					MRLCDRDIEAWLDNGKLVIDPRPPVERINGATVDVRLGNQFRTFSGHTAPFIDLSGPKHEVSAALDRVMSDEIVLPEGEAFFLHPGELALAVTLESVTIPDDLVGWLDGRSSLARLGLMVHVTAHRIDPGWQGRIVLEFYNSGKLPLALRPGMLIGALSFEPLSGPAARPYNRREDAKYRGQQGADASRIDKD---------------VIMAQPHLLAERISRLSNALEKGLYERHHAIRLCLLAALSGESVFLLGPPGIAKSLIARRLKYAFQNARAFEYLMTRFSTPEEVFGPLSIQALKDEGRYQRLTKGYLPDAEIVFLDEIWKAGPAILNTLLTAINERRFRNGDSEEKIPMRLLVTASNELPEADSGLEALYDRMLIRLWLDNVHEKQNFRSM…					MSNQRIRIRLKAFDHRLIDQSTAEIVETAKRTGAQVRGPIPLPTRKERFTVLISPHVNKDARDQYEIRTHKRLVDIVEPTEK---PLMH--------------MPVALLALALSAFAIGTTEFVIMGLLPEVAGDLQVSIPSAGWLISGYALGVAIGAPIMALLTAKLPRKRTLTLLMVIFIIGNVLCALAYTYNLLMLARVVTALCHGAFFGIGSVVAASLVAPSRQASAVALMFTGLTLANVLGVPLGTWFGQLFGWRATFWGVAIIGIFAFIALIVSLPANKEEKPVHLASEIGALANGKLWLSLLMTVFFAAAMFALFSYIAPLLLQVTGITDRGVSWTLFLIGAGLTVGNILGGKLADWKVSFSLILSFVLIAVFSLLFSWTSHALWLAELTLF…					----------MSAMSGKDTLALWRENNVEVVECVQCGHQMREADKQVRDKVRSNEQVIGIFHPEMTEQKASSAMVEETTPA-DTSPTPAGKKPRDKKSDGKVLSAVAIVIALAIGAGLYLNGKHQADLQAQTNQNLSEQLSALQQQLGSDKQQLTQQLDAANTALQEARTQQDNSAKELETLRDKVATISGNDTRTWLLAQADYLVKLAGRKLWSDQDVTTAATLLKSADTSLADMNDPSVMNVRRALTQDISSL					MQLNKVLKGLMLALPVIAVAACSSHKNNNNDQT-GMGADNGAY----GAGQN----GNMSSDEQARLQMQQLQQNNIVYFGLDKYDVASDYAQMLDQHAAFLRGNPSYKVTIEGHADERGTPEYNIALGERRASAVKMYLQGKGVSADQMSIVSYGKEKPAVPGHDEAAYAKNRRAVLVYMPVALLALALSAFAIGTTEFVIMGLLPEVAGDLQVSIPSAGWLISGYALGVAIGAPIMALLTAKLPRKRTLTLLMVIFIIGNVLCALAYTYNLLMLARVVTALCHGAFFGIGSVVAASLVAPSRQASAVALMFTGLTLANVLGVPLGTWFGQLFGWRATFWGVAIIGIFAFIALIVSLPANKEEKPVHLASEIGALANGKLWLSLLMTVFFAAAMFALF…					-MKFKRK---IQPYRAAAGGWGSLEATTRFVLDSKAALKNMRNLMRMNKARGFDCPGCAWGD-DNKSTFSFCENGAKAVTWEATRRVVEPEFFAQHSVSTLYQQSDYFLEYQGRLTHPMRYNNATDHYEPISWDDALAMIARHLKAMDHPDQMELYTSGRASNEASWLYQLFGRVMGTNNFPDCSNMCHEASGTGLKRSIGVGKGTIRLDDFDNANAIFVIGQNPGTNHPRMLHSLRHAADHGAKIVTFNTLRER					----------VNANINSLLERAEDPQKLVRLMIQEMEDTLVEVRSTSARALAERKQLLRRIEQAEIQQAEWQEKAELAISKEKEDLARSALIEKQKLTDLIASLQQESTQVEETLERMKGEIGELEKKLSETRARQQALTLRHQAASSSRDVRRQLDSGKLDDAMARFESFERRIDHMEAEAESQRFGKPKGLDQEFAELKADDEISQQLAALKAKMNRSE--MTDNNSALKKAGLKVTLPRLKILEVLQGPGPE					--------------------------MSENQEVTKKDQYNLNKLQKRLRRNVGEAIADYNMIEEGDRIMVCLSGGKDSYTMLEILRNLQKSAPVNFSLVAVNLDQKQPGFPAHILPAYLDDLGVEYHIVTEDTYSIVKDKIPEGKTTCSLCSRLRRGILYRTATELGCTKIALGHHRDDILQTLFLNMFYGGKMKGMPPKLMSDDGKHIVIRPLAYCREKDIIRFAEARQYPIIPCNLCGSQPNLQRQVVADMLR					--MKFIDTHCHFDFPPFVDDAAGSIARAAQSGVERIIVPSVDASRFALVSQLAQQHDALFAALGLHPINIAVHEEE-HLDQLEQWLKTPDSKRVAIGEIGLDLYMED--AQFDKQARLLDAQLKLAKQYELPVILHSRRTHDQLALHLRRHEVPRRGVVHGFAGSQQQAERFIQLGYAIGVGGTITYQRASKTRNTIANLPLSSLLLETDAPDMPLQGYQGQPNRPERARNVFEVLCELRSEPADIIADALWHNS					MQLNKVLKGLMLALPVIAVAACSSHKNNNNDQT-GMGADNGAY----GAGQN----GNMSSDEQARLQMQQLQQNNIVYFGLDKYDVASDYAQMLDQHAAFLRGNPSYKVTIEGHADERGTPEYNIALGERRASAVKMYLQGKGVSADQMSIVSYGKEKPAVPGHDEAAYAKNRRAVLVYMDQNRLTHLRQLEAESIHIIREVAAEFSNPVMMYSIGKDSSVMLHLARKAFYPGTLPFPLLHVDTGWKFREMYEFRDRTVKNMGAELLVHRNPEGVAMGINPFVHGSAKHTDIMKTEGLKQALNKYGFDAAFGGARRDEEKSRAKERIYSFRDRFHRWDPKNQRPELWHNYNGQINKGESIRVFPLSNWTELDIWQYIFLENIEIVPLYLAAPRPVLER…
>P_sp_A4					>P_sp_A4					>P_sp_A4					>P_sp_A4					>P_sp_A4					>P_sp_A4					>P_sp_A4					>P_sp_A4					>P_sp_A4					>P_sp_A4
--------------------MVTFQTNHGDIVIKTFDDKAPATVKNFLDYCREGFYDNTIFHRVINGFMIQGGGFEPGMDQKETKGEIKNEANNGLKNTKGTLAMARTQAPHSATAQFFINVADNDFLNYRSADLQGWGYCVFAEVVEGMDVVDKIKAVKTGRSGMHQDVPVDDVVIQKVTVSE-MSKTETMSAG---QTDDIRVSHVLRSPKLLTRETLAGVITALALIPEVISFSVIAGVDPKVSLIASVVLC					MRLCDRDIEAWLDSGKLAIEPRPPVERINGATVDVRLGNQFRTFSGHTAAFIDLSGPKQEVAAALDRVMSDEIVLPEGEAFFLHPGELALAVTLESVTIPDDLVGWLDGRSSLARLGLMVHVTAHRIDPGWQGRIVLEFFNSGKLPLALRPGMLIGALSFEPLSAPAARPYNRREDAKYRGQQGADASRIDKD-----------------MAQPHLLAERISRLSNALEKGLYERHHAIRLCLLAALSGESVFLLGPPGIAKSLIARRLKYAFQHARAFEYLMTRFSTPEEVFGPLSIQALKDEGRYQRLTKGYLPDAEIVFLDEIWKAGPAILNTLLTAINERRFRNGDIEEKIPMRLLVTASNELPEADSGLEALYDRMLIRLWLDNVHEKQNFRNM…					MKNQRIRIRLKAFDHRLIDQSTAEIVETAKRTGAQVVGPIPLPTRKERFTVLISPHVNKDARDQYEIRTHKRLIDIVEPTEKTVDALMRLDLAAGVDVQISLGMPIALLALAMSAFAIGTTEFVIMGLLPEVAGDLNVSIPSAGWLISGYALGVAIGAPIMALLTAKLPRKRTLVLLMSIFIVGNILCAIAYSYNLLMLARIVTALCHGAFFGIGSVVAASLVAPGKQASAVALMFTGLTLANVLGVPLGTWFGQLFGWRATFWGVAIIGVLAFISLIMSLPTNKDEKPVDLSREFGALGNGKLWLSLAMTVFFAAAMFALFSYIAPMLLQVTGISNRGVSWTLFLIGAGLTVGNILGGKLADWKVSVALILSFALIALFSLLFSWTSHSFMLAEVTLF…					MRKRFIAGAVCPQCQQKDTLALWRENNVDVVECVKCGHQMREADKQAKSQVRENEQVIGIFHPEMTEHKDSSAMVEETTPAEKSLSSAQNPQTHQKKNGGLVLGAVAIVIALALGTGLYLHGKQQADLQAQVNQQLNDQLSALQQQNNRENQQLAQQLDSANTALQQARSQQEATAKALDDLRQRVAMISGNDVNTWLISQADYLVKLAGRKLWSDQDVTTAAALLKSADDSLADMNDPSVMNVRRALTEDISTLSAISQVDYDGIILRLNQLSNGVDNLRLADNDSDDSPMDNDSGELSSSLREWRQNLVKSWHNFMDDFITIRRRDTTAQPLLAPNQDIYLRENIRSRLLIAAQAVPRHQNEVYKQSIDAVSTWVRAWYDTNDAATKAFLSQLDDLS…					MQLNKVLKGLLLAVPVLAVAACSSHKNNNNDQT-GVGADNGAY----GAGAN---GGNMSSDEQARLQMQQLQQNNIVYFGLDKYDIQSEYAQMLDQHAAFLRSNPSYKVTIEGHADERGTPEYNIALGERRASAVKMYLQGKGVSPDQMSIVSYGKEKPAVLGHDEAAWSKNRRAVLVYMPIALLALAMSAFAIGTTEFVIMGLLPEVAGDLNVSIPSAGWLISGYALGVAIGAPIMALLTAKLPRKRTLVLLMSIFIVGNILCAIAYSYNLLMLARIVTALCHGAFFGIGSVVAASLVAPGKQASAVALMFTGLTLANVLGVPLGTWFGQLFGWRATFWGVAIIGVLAFISLIMSLPTNKDEKPVDLSREFGALGNGKLWLSLAMTVFFAAAMFALF…					-MKFKRK---IQPYRAAAGGWGSLEATTRFVLDSKAALKNMRNLLRMNKARGFDCPGCAWGD-DNKSTFSFCENGAKAVTWEATRRIVDNAFFAQHSVSKLYQQSDYFLEYQGRLTQPMRYNSETDHYEPVTWDDAFALIAEHIQAMDNPDQMELYTSGRASNEASWLYQLFGRMHGSNNFPDCSNMCHEASGSGLKRSIGVGKGTIRLDDFDHAEAIFVFGQNPGTNHPRMLHSLRHAADHGARIVTFNTLRER					MGIFSRFADIVNANINSLLERAEDPQKLVRLMIQEMEDTLIEVRSTSARALAEKKHLQRRIEQAEVQQAEWQEKAELALRREKDDLARAALIEKQKLTDLIGSLRDEVVQVEETLNRLKGEIGELEKKLSETRARQQALTLRHQAASNSRDVRRQLDSGKIDEAMARFESFERRIDHMEAEAESQRFGKSKSLDQQFAELQADDEISEQLAALKAKMNRSE--MTDNNSALKKAGLKVTLPRLKILEVLQ--EPACHHVSAEDLYKRLIDIGEEIGLATVYRVLNQFDDAGIVTRHNFEGGKSVFELTQQQHHDHLICLDCGKVIEFSDESIETRQKDIATRHGIKLTNHSLYLYGHCASGDCREDETLHND-MTDKLTSLRQLTTVVADTGDIAAMKL…					----------------------------MNHTDTRKETLEFNKLAKRLRRNVGNAITDYNMIEEGDVVMACMSGGKDSFAMLDILLSLQKVAPIHFEVIAVNLDQKQPGFPEHILPDYFETLNIPYYIVDKDTYSVVKEKVPEGKTTCGLCSRLRRGTLYSFAEKIGATKIALGHHMDDMVETLFLNMFHGARLKGMPPKLRSDDGRNVVIRPLTYCREKDLIRFAEEKNFPIIPCNLCGSQENLQRQAIKAMLT					--MRFIDTHCHFDFPPFIDDVAGSIARAAAAGVERIIIPAVEASRFATVSQLAQQHDALYAALGLHPIAIARHQDS-DLDELETCLQFPDSKRVAIGEVGLDLYMPE--PQFERQKWLLEVQLKLAKKYDLPLILHSRRTHDQLALLLRRHNVARCGVVHGFAGSLQQAQAFIKLGYAIGVGGTITYERASKTRQTISQLPLSALLLETDAPDMPLNGFQGEPNRPERARNVWQTLCELRPEAPEVIAEALWHNS					MQLNKVLKGLLLAVPVLAVAACSSHKNNNNDQT-GVGADNGAY----GAGAN---GGNMSSDEQARLQMQQLQQNNIVYFGLDKYDIQSEYAQMLDQHAAFLRSNPSYKVTIEGHADERGTPEYNIALGERRASAVKMYLQGKGVSPDQMSIVSYGKEKPAVLGHDEAAWSKNRRAVLVYMDQKRLTHLRQLEAESIHIIREVAAEFSNPVMMYSIGKDSSVMLHLARKAFYPGTLPFPLLHVDTGWKFREMYEFRDRTVKQIGAELLVHRNPEGVAMGISPFVHGSAKHTDIMKTEGLKQALNKYGFDAAFGGARRDEEKSRAKERIYSFRDRFHRWDPKNQRPELWHNYNGQINKGESIRVFPLSNWTELDIWQYIFLENIEIVPLYLAAPRPVLER…
>P_allii					>P_allii					>P_allii					>P_allii					>P_allii					>P_allii					>P_allii					>P_allii					>P_allii					>P_allii
--------------------MVTFQTNHGDIVIKTFDDKAPATVKNFLDYCREGFYDNTIFHRVINGFMIQGGGFEPGMKQKATKEEIRNEASNGLKNTKGTLAMARTSAPHSATAQFFINVADNDFLNFRDESLQGWGYCVFAEVVEGMDVVEKIKAVSTGRSGMHQDVPKDDVIIQKVTVSE-MLLSSTRKDW---------LGN-------VRGDVLAGIVVALALIPEAIAFSAIAGVDPQVGLYSAFCIP					MRLCDRDIEAWLDSGKLAITPRPPVERINGATVDVRLGNQFRTFSGHTAAFIDLSGPKDEVSAALDRVMSDEIVLPEGEAFFLHPGELALAVTLESVTIPDDLVGWLDGRSSLARLGLMVHVTAHRIDPGWQGRIVLEFYNSGKLPLALRPGMLIGALSFEPLSGPAARPYNRRENAKYRGQQGADASRIDKD---------------VIMAQPHLLAERISRLSNALEKGLYERHHAIRLCLLAALSGESVFLLGPPGIAKSLIARRLKCAFQHARAFEYLMTRFSTPEEVFGPLSIQALKDEGRYQRLTKGYLPDAEIVFLDEIWKAGPAILNTLLTAINERRFRNGDSEEKIPMRLLVTASNELPEADSGLEALYDRMLIRLWLDNVHEKQNFRSM…					MSNQRIRIRLKAFDHRLIDQSTAEIVETAKRTGAQVRGPIPLPTRKERFTVLISPHVNKDARDQYEIRTHKRLVDIVEPTEKTVDALMRLDLAAGVDVQISLGMPVALLALALSAFAIGTTEFVIMGLLPEVANDLRVTIPSAGWLISGYALGVAIGAPVMALLTAKLPRKKTLILLMVIFIIGNLLCALAYSYNLLMLARVVTALCHGAFFGIGSVVAASLVSADRQASAVALMFTGLTLANVLGVPLGTWFGQLFGWRATFWGVSAIGVLAFIALITSLPGNKNEKPVNLASEISALANGKLWLSLLMTVCFAAAMFALFSYIAPLLLQVTGIGDRGVSWTLFLIGAGLTVGNILGGKMADRKVSLSLIGSFSLITLFSLLFSWTSHALWLAEITLF…					MRKRFIAGAVCPHCQEKDTLAMWRENNVDVVECVKCGHQMREADKQARDQVRGNEQVIGIFHPEMTEQKDTSAVVEETTPAVDRPSSTQEKSPRKRHNGGMVLGAVAIVIALAIGAGLYLNDKHQAERQAQTNQDLSDQLAKLQQQANSDKQQLTQQLNAAEKTLETAQSQQAASAKELETLREKMASISGNDVRSWLVAQADYLVKLAGRKLWSDQDVTTAAALLKSADASLADMNDPSVMNVRRALTQDISTLSSLSQVDYDGIILKLNQLSNGVDNLRLADNDSDEAPMDSDSGELSSSIREWRQNLVKSWHNFMDDFITIRRRDNTAQPLLAPNQDVYLRENIRSRLLIAAQAVPRHQEEIYKQSLETVSAWVRAWYDTNDASTKAFLAQLDELS…					MQLNKVLKGLMLALPIMAVAACSSHKNNNNDQS-GAGA-DGAY--GANSGMNG--NGNMSSDEQARLQMQQLQQNNIVYFGLDKFDVQSDYAQMLDQHANFLRSNPSYKVTIEGHADERGTPEYNIALGERRANAVKMYLQGKGVSADQMSIVSYGKEKPAVLGHDEAAYAKNRRAVLVYMPVALLALALSAFAIGTTEFVIMGLLPEVANDLRVTIPSAGWLISGYALGVAIGAPVMALLTAKLPRKKTLILLMVIFIIGNLLCALAYSYNLLMLARVVTALCHGAFFGIGSVVAASLVSADRQASAVALMFTGLTLANVLGVPLGTWFGQLFGWRATFWGVSAIGVLAFIALITSLPGNKNEKPVNLASEISALANGKLWLSLLMTVCFAAAMFALF…					MMKFKRQ---IKPYRAAAGGWGSLEATTRFVFDSKAALKNLRNLMRMNKARGFDCPGCAWGD-DNKSTFSFCENGAKAVTWEATRRVVDTDFFAKHSVTTLYAQSDYFLEYQGRLTHPLRYNAESDHYEPISWDDAYALIAKHIKAMDNPDQMELYTSGRASNEASWLYQLFGRMSGTNNFPDCSNMCHEASGAGLKRSIGVGKGTIRLDDFDHADAIFVFGQNPGTNHPRMLHSLRHAADHGAKIVTFNTLRERGLERFADPQKPLEIVTSKAGTISSAYYQPHLGGDMAAVRGMVKALLETHRARIAAGESGLFDQAFLNAKTHGVEAYFDAVDNTDWMQIVAQSGLTEAQIREAAAIYQSADRVICTWAMGITQHKHSVDTVREITNLQLLFGQLG…					MGIFSRFTDIVNANINSLLERAEDPQKLVRLMIQEMEDTLVEVRSTSARALAEKKQLSRRIEQAEIQQVEWQDKAELALRKDKEDLARSALIEKQKLTDLIASLKQEVAQVEETLARMKGEITELEKKLSETRARQQALTLRHQAASSSRDVRRQLDSGKIDEAMARFESFERRIDHMEAEAESHGFGKPKTLDQQFTDLKADDEISQQLNALKAKMNRSE--MTDNNTALKKAGLKVTLPRLKILEVLQ--EPACHHVSAEDLYKRLLDMGEEIGLATVYRVLNQFDDAGIVTRHNFEGGKSVFELTQQHHHDHLICLDCGKVIEFSDESIETRQREIATRHGIKLTNHSLYLYGHCALGDCREDETLHDK-MTDKLTSLRQLTTVVADTGDIAAMKL…					--------------------------MQQDQEINKKEQYNLNKLQKRLRRNVGEAIADFNMIEEGDRIMVCLSGGKDSYTMLEILRNLQKSAPVKFSLVAVNLDQKQPGFPGHILPEYLEAQGVEYKIVEEDTYSIVKDKIPEGKTTCSLCSRLRRGILYRTATELGCTKIALGHHRDDILQTLFLNMFYGGKMKGMPPKLMSDDGKHIVIRPLAYCREKDIIRFSEARQFPIIPCNLCGSQPNLQRQVIADMLR					--MRFVDTHCHFDFPPFVDEVDASLRQAANAGVEKIIVPSVEAGRFDLVCQLAREHQALYAALGLHPIVIEHHKEP-HLAELERLLQQRPAKLVALGEIGLDRYRED--PHFDQQTYFLDAQLKLAKRYDLPVILHSRRTHDQLALHLRRHDLPRRGVVHGFAGSLQQAQAFIKLGYAIGVGGTITYPRASKTRQTIAQLPLSSLLLETDAPDMPLNGFQGQPNRPERAFQVWQVLCELRDESPETIADALWHNS					MQLNKVLKGLMLALPIMAVAACSSHKNNNNDQS-GAGA-DGAY--GANSGMNG--NGNMSSDEQARLQMQQLQQNNIVYFGLDKFDVQSDYAQMLDQHANFLRSNPSYKVTIEGHADERGTPEYNIALGERRANAVKMYLQGKGVSADQMSIVSYGKEKPAVLGHDEAAYAKNRRAVLVYMDQKRLTHLRQLEAESIHIIREVAAEFGNPVMMYSIGKDSSVMLHLARKAFYPGTLPFPLLHVDTGWKFREMYEFRDRTVKAMGAELLVHRNPEGVAMGINPFVHGSAKHTDIMKTEGLKQALNKYGFDAAFGGARRDEEKSRAKERIYSFRDRFHRWDPKNQRPELWHNYNGQINKGESIRVFPLSNWTELDIWQYIFLENIEIVPLYLAAPRPVLER…
>P_septica					>P_septica					>P_septica					>P_septica					>P_septica					>P_septica					>P_septica					>P_septica					>P_septica					>P_septica
MASALCGGQTADDNLYRTRMMVTFQTNHGDIVIKTFDDKAPATVQNFLEYCREGFYDNTIFHRVINGFMIQGGGFEPGMKQKETKAEIRNEANNGLKNTRGTLAMARTSAPHSATAQFFINVADNDFLNFRDESLQGWGYCVFAEVVEGMDVVDKIKAVSTGRSGMHQDVPKDDVVIQKVTVSE-MNQPDNVIHS---LDNDLSMGRVLRSPALLTRECLAGVITALALIPEVISFSVIAGVDPRVSLVASVVLCLTLSILGGRPAMVTAAAGSVALVIGPMVHTHGVAYILPAVVLGGVIQILFGLAGLARMMRYIPRSVMLGFVNALGVLIFFAQVPHVWGQNSLVWLLFAVTLTIVLLLPRLLKSVPSPLVAILVVTAVALLMGWRVPNVGDEGPM…					MRLCDRDIEAWLDDGRLAIDPRPPVERINGATVDVRLGNQFRTFRGHTAAFIDLSGPKDEVSAALDRVMSDEIVLPEGEAFFLHPGELALAVTFESVTIPDDLVGWLDGRSSLARLGLMVHVTAHRIDPGWQGRIVLEFYNSGKLPLALRPGMLIGALSFEPLSGPAARPYNRREDAKYRGQQGAVASRIDKD---------------VIMAQPHLLAERISRLSNALEKGLYERHDAIRLCLLAALSGESVFLLGPPGIAKSLIARRLKYAFQNARAFEYLMTRFSTPEEVFGPLSIQALKDEGRYQRLTKGYLPDAEIVFLDEIWKAGPAILNTLLTAINERRFRNGDSEEKIPMRLLVTASNELPEADSGLEALYDRMLIRLWLDNVHEKQNFRSM…					MQNQRIRIRLKAFDHRLIDQSTAEIVETAKRTGAQVRGPIPLPTRKERFTVLISPHVNKDARDQYEIRTHKRLVDIVEPTEKTVDALMRLDLAAGVDVQISLGMPVALLALALSAFAIGTTEFVIMGLLPDVAGDLQVSIPSAGWLISGYALGVAIGAPIMALLTAKLPRKKTLILLMSIFIIGNVLCALAYTYNLLMMARVITALCHGAFFGIGAVVASSLVAPSRQASAVALMFTGLTLANVLGVPLGTWFGQLFGWRATFWGVAIIGVLAFIALIVSLPTNKEEKPVHLASEISALANGKLWLSLLMTVFFAAAMFALFSYIAPLLLQVTGISARGVSWTLFLIGAGLTVGNILGGKLADWKVSFSLILSFSLIAIFSLLFSWTSHALWLAEVTLF…					MRKRFIAGAVCPHCQEKDTLAMWRENNVDVVECVKCGHQMREADKQVRDQVRSQEQVIGIFHPEMTEQKATSATVEETTPAADTSPSSRPQPPRDKKSGGMVLGAVAIVIALATGAGLYLNGKHQAELQAQANQSLSDKLDALQQQAGSDKQQLTQQLSGAQTALNDARTQQAATAKELEALREKVATISSNDVNAWLVSQADYLVKLAGRKLWSDQDVTTAAALLKSADASLADMNDPSVTSVRRALTQDISALSSIDQIDYDGIILKLNQLSNGVDNLRLADNDSDDAPMDSDGGELTSSLREWRQNLVKSWHNFMDDFITIRRRDNTAQPLLAPNQDVYLRENIRSRLLIAAQAVPRHQDEIYKQSIDTVSSWVRAWYDTNDPATKAFLAQLDELS…					MQLNKVLKGLMLALPVLAVAACSSHKNNNNDQT-GMGA-DGAY--GNGAGMNGSGNGNMSSDEQARLQMQQLQQNNIVYFGLDKYDVQSDYAQMLDQHAAFLRSNPSYKVTIEGHADERGTPEYNIALGERRANAVKMYLQGKGVSADQMSIVSYGKEKPAVLGHDEAAYSKNRRAVLVYMPVALLALALSAFAIGTTEFVIMGLLPDVAGDLQVSIPSAGWLISGYALGVAIGAPIMALLTAKLPRKKTLILLMSIFIIGNVLCALAYTYNLLMMARVITALCHGAFFGIGAVVASSLVAPSRQASAVALMFTGLTLANVLGVPLGTWFGQLFGWRATFWGVAIIGVLAFIALIVSLPTNKEEKPVHLASEISALANGKLWLSLLMTVFFAAAMFALF…					-MKFKRK---IKPYRAAAGGWGSLEATTRFVLDSKAALKNMRNLMRMNKARGFDCPGCAWGD-DNKSTFSFCENGAKAVTWEATRRVVDTDFFAQHSVTKLYAQSDYFLEYQGRLTHPMRYNAETDHYEPVSWDDAFALIAQHIKAMDNPNQMELYTSGRASNEASWLYQLFGRLAGTNNFPDCSNMCHEASGAGLKRSIGVGKGTIRLDDFDHADAIFVFGQNPGTNHPRMLHSLRHAADHGAKIVTFNTLRER					MGIFSRFADIVNANINSLLERAEDPQKLVRLMIQEMEDTLIEVRSTSARALAEKKQLNRRIEQAEVQQAEWQEKAELALRKDKDDLARAALIEKQKLTDLIASLQQEVAHVEETLERMKGEIGELEKKLSETRARQQALTLRHQAASTSRDARRQLDSGKLDEAMARFESFERRIDHMEAEAESQRFGKSKSLDAQFADLQADDEISQQLEALKAKMNRSE--MTDNNTALKKAGLKVTLPRLKILEVLQ--EPQCHHVSAEDLYKRLIDMGEEIGLATVYRVLNQFDDAGIVTRHNFEGGKSVFELTQQHHHDHLICLDCGKVIEFSDESIESRQRDIATRHGIKLTNHSLYLYGHCSLGDCREDETLHDQ-MTDKLTSLRQLTTVVADTGDIAAMKL…					--------------------------MQENQTVDKKEQYNLNKLQKRLRRNVGAAIADYNMIEEGDRIMVCLSGGKDSYTLLEILRNLQQSAPVNFSLVAVNLDQKQPGFPGHILPEYLETLGVEYKIVEEDTYSIVKEKIPEGKTTCSLCSRLRRGILYRTATELGCTKIALGHHRDDIMQTLFLNMFYGGKMKGMPPKLMSDDGRHIVIRPLAYCREKDIVRFSEARKFPIIPCNLCGSQPNLQRQVIGDMLR					--MRFTDTHCHFDFPPFVGDESASIARAAEAGVERIIVPAVEASRFARIVSLAAQHRALYAALGLHPIAIDRHEDA-HLEQLENWLRQQPPKLTAIGEIGLDLYMEN--PQFARQEFLLDAQLRLAKRYDLPVILHSRRTHDKLALHLRRHDLPRRGVVHGFAGSLQQAQAFIKLGYAIGVGGTLTYERASKTRNTLAQLPLDALLLETDAPDMPLHGFQGEPNRPERARLVWQTLCELRPEPPQVIAEALWRNT					MQLNKVLKGLMLALPVLAVAACSSHKNNNNDQT-GMGA-DGAY--GNGAGMNGSGNGNMSSDEQARLQMQQLQQNNIVYFGLDKYDVQSDYAQMLDQHAAFLRSNPSYKVTIEGHADERGTPEYNIALGERRANAVKMYLQGKGVSADQMSIVSYGKEKPAVLGHDEAAYSKNRRAVLVYMDQKRLTHLRQLEAESIHIIREVAAEFGNPVMMYSIGKDSSVMLHLARKAFYPGTLPFPLLHVDTGWKFREMYAFRDRTVKEMGAELLVHRNPEGVAMGINPFVHGSAKHTDIMKTEGLKQALNKYGFDAAFGGARRDEEKSRAKERIYSFRDRFHRWDPKNQRPELWHNYNGQINKGESIRVFPLSNWTELDIWQYIFLENIEIVPLYLAAPRPVLER…
>P_sp_At-9b					>P_sp_At-9b					>P_sp_At-9b					>P_sp_At-9b					>P_sp_At-9b					>P_sp_At-9b					>P_sp_At-9b					>P_sp_At-9b					>P_sp_At-9b					>P_sp_At-9b
--------------------MVTFQTNHGDIVIKTFDDKAPATVKNFLDYCREGFYDNTIFHRVINGFMIQGGGFEPGMKQKATKEDIRNEANNGLKNTRGTLAMARTQAPHSATAQFFINVADNDFLNFRDESLQGWGYCVFAEVVEGMDVVDKIKAVATGRSGMHQDVPKDDVIIQKVTVSE-MSQPTEDLT----------VRRVLRSPALLTRECLAGVITALALIPEVISFSVIAGVDPKVSLVASVVLC					MRLCDRDIETWLDSGKLAISPRPPVERINGATVDVRLGNQFRTFRGHTAAFIDLSGPKHEVSAALDRVMSDEIVLPEGEAFFLHPGELALAVTLESVTLPDDLVGWLDGRSSLARLGLMVHVTAHRIDPGWQGRIVLEFYNSGKLPLALRPGMLIGALSFEPLSGPAARPYNRREDAKYRGQQGADASRIDKD-----------------MAQPHLLAERISRLSNALEKGLYERHHAIRLCLLAALSGESVFLLGPPGIAKSLIARRLKYAFQHARAFEYLMTRFSTPEEVFGPLSIQALKDEGRYQRLTKGYLPDAEIVFLDEIWKAGPAILNTLLTAINERRFRNGDSEDKIPMRLLVTASNELPEADSGLEALYDRMLIRLWLDNVHEKQNFRSM…					MSNQRIRIRLKAFDHRLIDQSTAEIVETAKRTGAQVRGPIPLPTRKERFTVLISPHVNKDARDQYEIRTHKRLVDIVEPTEKTVDALMRLDLAAGVDVQISLGMPVALLALALSAFAIGTTEFVIMGLLPEVAGDLHVSIPSAGWLISGYALGVAIGAPIMALLTAKLPRKRTLVLLMSIFIIGNVLCALAYSYDLLMMARIVTALCHGAFFGIGSVVAASLVAPSRQASAVALMFTGLTLANVLGVPLGTWFGQMFGWRATFWGVAIIGILAFVALIVSLPTNKEEKPVHLASEVSALANGKLWLSLLMTVCFAAAMFALFSYIAPLLLQVTGISDRGVSWTLFLIGAGLTVGNILGGKLADWKVSFSLILSFSLIALFSLLFSWTSHALWLAEVTLF…					MRKRFIAGAVCPHCQQKDTLAMWRENNVDVVECVKCGHQMREADKQVRDQVRSQEQVIGIFHPEMTEQKASSAVVEETTPAGDNATPPAKKSPRDTKRDGKVLGAVAIVIALAIGAGLYLNGKHQADLQAQTNQNLSEQLSALQQQLGSDKQQLTQQLESANSALQEARNQQDASAKELEALRQKVATISGNDTRTWLLAQADYLVKLAGRKLWSDQDVTTAAALLKSADTSLAEMNDPSVMNVRRALTQDISSLSAVSQVDYDGIILKLNQLSNGVDNLRLADNDNDDSPMDADSSELSSSLHEWRQNLVKSWHNFMDGFITIRRRDNTAQPLLAPNQDVYLRENIRSRLLIAAQAVPRHQDEIYKQSIDAVSSWVRAWYDTNDAATKAFLDQLDELS…					MQLNKVLKGLMLALPVIAVAACSSHKNNNNDQT-GMGA-DGAY----GSGQN----GNMSSDEQARLQMQQLQQNNIVYFGLDKYDVQSEYAQMLDQHAAFLRSNPSYKVTIEGHADERGTPEYNIALGERRANAVKMYLQGKGVSADQMSIVSYGKEKPAVLGHDEAAYAKNRRAVLVYMPVALLALALSAFAIGTTEFVIMGLLPEVAGDLHVSIPSAGWLISGYALGVAIGAPIMALLTAKLPRKRTLVLLMSIFIIGNVLCALAYSYDLLMMARIVTALCHGAFFGIGSVVAASLVAPSRQASAVALMFTGLTLANVLGVPLGTWFGQMFGWRATFWGVAIIGILAFVALIVSLPTNKEEKPVHLASEVSALANGKLWLSLLMTVCFAAAMFALF…					-MKFKRK---IQPYRAAAGGWGSLEATTRFVLDSKAALKNMRNLLRMNKARGFDCPGCAWGD-DNKSTFSFCENGAKAVTWEATRRVVEPAFFAQHSVSTLYQQSDYFLEYQGRLTHPLRYNRDTDHYEPISWDEAFALVASHLQAMDHPDQMELYTSGRASNEASWLYQLFGRLMGTNNFPDCSNMCHEASGSGLKRSIGVGKGTIRLDDFDHADAIFVFGQNPGTNHPRMLHSLRHAADHGARIVTFNTLRER					MGIFSRFADIVNANINSLLERAEDPQKLVRLMIQEMEDTLVEVRSTSARALAEKKQLLRRIEQADIQQAEWQEKAELALRKDKDDLARSALIEKQKLTDLIAALQQEVAQVEETLERMKGEIGELEKKLSETRARQQALTLRHQAASSSRDVRRQLDSGKLDDAMARFESFERRIDHMEAEAESQRFGKPKSLDQEFAELKADDEISQQLAALKEKMNRGE--MTDNNSALKKAGLKVTLPRLKILEVLQ--EPECHHVSAEDLYKRLIDMGEEIGLATVYRVLNQFDDAGIVTRHNFEGGKSVFELTQQHHHDHLICLDCGKVIEFSDESIETRQREIATRHGIKLTNHSLYLYGHCALGDCREDETLHDKQMTDKLTSLRQLTTVVADTGDIAAMKL…					--------------------------MQQNQDNTKKEQYNLNKLQKRLRRNVGEAIADFNMIEEGDRIMVCLSGGKDSYTLLEILRNLQQSAPVNFSLVAVNLDQKQPGFPAHVLPAYLDKLGVEYKIVNEDTYSIVKEKIPEGKTTCSLCSRLRRGILYRTATELGCTKIALGHHRDDILQTLFLNMFYGGKMKGMPPKLMSDDGKHIVIRPLAYCREKDIIRFAEARQYPIIPCNLCGSQPNLQRQVVADMLR					--MRFIDTHCHFDFPPFVDAAEASIAQAAQAGVERIIVPSVDASRFARVSQLAQQHAALYAALGLHPIQIAVHQDT-HLDQLAECLDTPDAKRVALGEIGLDLYMDD--PQFDKQTRLLDGQLKLAKRYDLPVILHSRRTHDQLALHLRRHDLPRRGVVHGFAGSLQQAQRFIQLGYAIGVGGTITYERASKTRNTIAALPLDSLLLETDAPDMPLNGYQGEPNRPERARLVFEVLCQLRHESPDVIADALWQNS					MQLNKVLKGLMLALPVIAVAACSSHKNNNNDQT-GMGA-DGAY----GSGQN----GNMSSDEQARLQMQQLQQNNIVYFGLDKYDVQSEYAQMLDQHAAFLRSNPSYKVTIEGHADERGTPEYNIALGERRANAVKMYLQGKGVSADQMSIVSYGKEKPAVLGHDEAAYAKNRRAVLVYMDQNRLTHLRQLEAESIHIIREVAAEFSNPVMMYSIGKDSSVMLHLARKAFYPGTLPFPLLHVDTGWKFREMYEFRDRTIKAMGAELLVHRNPEGVAMGINPFVHGSAKHTDIMKTEGLKQALNKYGFDAAFGGARRDEEKSRAKERIYSFRDRFHRWDPKNQRPELWHNYNGQINKGESIRVFPLSNWTELDIWQYIFLENIEIVPLYLAAPRPVLER…
>P_s_indologenes					>P_s_indologenes					>P_s_indologenes					>P_s_indologenes					>P_s_indologenes					>P_s_indologenes					>P_s_indologenes					>P_s_indologenes					>P_s_indologenes					>P_s_indologenes
--------------------MVTFQTNHGDIVIKTFDDKAPATVKNFLDYCREGFYDNTIFHRVINGFMIQGGGFEPGMKQKATKEEIRNEANNGLKNTKGTLAMARTSAPHSATAQFFINVADNDFLNFRDESLQGWGYCVFAEVVEGMDVVEKIKAVSTGRSGMHQDVPKDDVIIQKVTVSE--LLSSTRKDW---------LGN-------VRGDVLAGIVVALALIPEAIAFSIIAGVDPQVGLYSAFCIP					MRLCDRDIEAWLDTGKLAITPRPTVEHINGATVDVRLGNQFRTFSGHTAPFIDLSGPKHEVSAALDRVMSDEIVLPEGEAFFLHPGELALAVTLESVTIPDDLVGWLDGRSSLARLGLMVHVTAHRIDPGWQGRIVLEFYNSGKLPLALRPGMLIGALSFEPLSGPAARPYNRRENAKYRGQQGADASRIDKD-----------------MAQPHLLAERISRLSNALEKGLYERHHAIRLCLLAALSGESVFLLGPPGIAKSLIARRLKCAFQHARAFEYLMTRFSTPEEVFGPLSIQALKDEGRYQRLTKGYLPDAEIVFLDEIWKAGPAILNTLLTAINERRFRNGDSEEKIPMRLLVTASNELPEADSGLEALYDRMLIRLWLDNVHEKQNFRSM…					MSNQRIRIRLKAFDHRLIDQSTAEIVETAKRTGAQVRGPIPLPTRKERFTVLISPHVNKDARDQYEIRTHKRLVDIVEPTEKTVDALMRLDLAAGVDVQISLGMPVALLALALSAFAIGTTEFVIMGLLPEVANDLQVTIPSAGWLISGYALGVAIGAPVMALLTAKLPRKKTLILLMAIFIIGNLLCALAYSYNLLMLARVITALCHGAFFGIGAVVAASLVAADRQASAVALMFTGLTLANVLGVPLGTWFGQLFGWRATFWGVAVIGVLAFIALITSLPENKNEKPVNLASEISALANGKLWLSLLMTVCFAAAMFTLFSYIAPLLLQVTGISDHGVSWTLFLIGAGLTAGNILGGKLADRNVALSLTGSFLLIALFSLLFSWTSHALWLAEITLF…					MRKRFIAGAVCPHCQEKDTLAMWRENNVDVVECVKCGHQMREADKQARDQVRSNEQVIGIFHPEMTEQKDTSAVVEETTPAVDRDASLQEQPPRKQKNGGMVLGAVAIVIALAIGAGLYLNDKHQAELQAQTNQSLSEQLAKLQQQANSDKQQLSQQLSTTEKALETAQAQQAASEKALQALREKLASISGNDVRSWLVAQADYLVKLAGRKLWSDQDVTTAAALLKSADASLADMNDPSVMNVRRALTQDISTLSAISQVDYDGIILKLNQLSNNVDNLRLADNDSDDAPMDSDNGELSGSIREWRQNLVKSWHNFMDDFITIRRRDNTAQPLLAPNQDVYLRENIRSRLLIAAQAVPRHQEEIYKQSLETVSTWVRAWYDTNDASTKAFLAQLDELS…					MQLNKVLKGLMLALPIMAVAACSSHKNNNNDQS-GAGA-DGAY--GANSGMN---NGNMSSDEQARLQMQQLQQNNIVYFGLDKYDVQPDYAQMLDQHANFLRSNPSYKVTIEGHADERGTPEYNIALGERRANAVKMYLQGKGVSADQMSIVSYGKEKPAVLGHDEAAYAKNRRAVLVYMPVALLALALSAFAIGTTEFVIMGLLPEVANDLQVTIPSAGWLISGYALGVAIGAPVMALLTAKLPRKKTLILLMAIFIIGNLLCALAYSYNLLMLARVITALCHGAFFGIGAVVAASLVAADRQASAVALMFTGLTLANVLGVPLGTWFGQLFGWRATFWGVAVIGVLAFIALITSLPENKNEKPVNLASEISALANGKLWLSLLMTVCFAAAMFTLF…					-MKEQNRTEGVKPYDGAAGGWGALKAVAGAIRGQMAVKQDVIALFKVNQPEGFDCPGCAWPDPKHTSSFEFCENGAKAVSWEATSKRTTPEFFAAHPVSELWQRSAYELEGEGRLTHPMKYDPVTDTYQPIEWQTAFNEIGERLRSYHNPDSVEFYTSGRASNEAAFLWQLFAREFGTNNFPDCSNMCHEPTSVGLPESIGIGKGTVELDDFDHCDLVICIGHNPGTNHPRMLATLQEVSKRGAKIVAINPLRER					MGIFSRFADIVNANINSLLERAEDPQKLVRLMIQEMEDTLVEVRSTSARALAEKKQLSRRIEQAELQQAEWQEKAELAIRKDKEDLARSALIEKQKLTDLIASLKREVEQVDETLTRMKGEIAELEKKLSETRARQQALTLRHQAASSSRDVRRQLDSGKIDEAMARFESFERRIDHMEAEAESHGFGKPKTLDQQFTELKADDEISQQLNALKAKMNRSE--MTDNNTALKKAGLKVTLPRLKILEVLQ--EPACHHVSAEDLYKRLIDMGEEIGLATVYRVLNQFDDAGIVTRHNFEGGKSVFELTQQHHHDHLICLDCGKVIEFSDESIETRQRDIATRHGIKLTNHSLYLYGHCALGDCREDETLHDK-MTDKLTSLRQLTTVVADTGDIAAMKL…					--------------------------MLQNQEINKKEQYNLNKLQKRLRRHVGEAIADFNMIEEGDRIMVCLSGGKDSYTMLEILRSLQKSAPVSFSLVAVNLDQKQPGFLGHILPEYLEAQGVEYKIVEEDTYSIVKEKIPEGKTTCSLCSRLRRGILYRTATELGCTKIALGHHRDDILQTLFLNMFYGGKMKGMPPKLMSDDGKHIVIRPLAYCREKDIIRFSEARQFPIIPCNLCGSQPNLQRQVVADMLR					--MRFVDTHCHFDFPPFVDAADVSLRQAADAGVEKIIVPSVEAGRFDLVCQLARQHRALYAALGLHPIVTEQHEEQ-HLAQLESLLQQRPPKLVALGEIGLDLYRDD--PQFDKQTCFLDAQLKLAKRYDLPVILHSRRTHDQLALHLRRQAVPRRGVVHGFAGSLQQAQAFIKLGYAIGVGGTITYPRASKTRQTIARLPLSSLLLETDAPDMPLNGYQGQPNRPERAVLVWQVLCELRDEPPAEIADALWHNS					MQLNKVLKGLMLALPIMAVAACSSHKNNNNDQS-GAGA-DGAY--GANSGMN---NGNMSSDEQARLQMQQLQQNNIVYFGLDKYDVQPDYAQMLDQHANFLRSNPSYKVTIEGHADERGTPEYNIALGERRANAVKMYLQGKGVSADQMSIVSYGKEKPAVLGHDEAAYAKNRRAVLVYMDQKRLTHLRQLEAESIHIIREVAAEFGNPVMMYSIGKDSSVMLHLARKAFYPGTLPFPLLHVDTGWKFREMYEFRDRTVKAMGAELLVHRNPEGVAMGINPFVHGSAKHTDIMKTEGLKQALNKYGFDAAFGGARRDEEKSRAKERIYSFRDRFHRWDPKNQRPELWHNYNGQINKGESIRVFPLSNWTELDIWQYIFLENIEIVPLYLAAPRPVLER…
>T_morbirosei					>T_morbirosei					>T_morbirosei					>T_morbirosei					>T_morbirosei					>T_morbirosei					>T_morbirosei					>T_morbirosei					>T_morbirosei					>T_morbirosei
--------------------MVTFQTNFGDIVIKTFDDKAPTTVQNFLEYCREGFYDNTIFHRVINGFMIQGGGFEPGMKQKSTKAEIRNEANNGLKNTRGTLAMARTSAPHSATAQFFINVADNDFLNFRDESLQGWGYCVFAEVVEGMDVVEKIKAVSTGRSGMHQDVPKDDVVIQKVTVSE-MNQENSPASASVTSHHSPGVTSVLRSPALMTRECLAGVITALALIPEVISFSVVSGVAPQVSLIASVVIC					MRLCDRDIEVWLDTGRLEILPRPPVERISGATVDVRLGNKFRTFRGHTAAFIDLSGPKDEVSAALDRVMSDEIVLPEGDAFFLHPGELALAVTLESVTLPDDLVGWLDGRSSLARLGLMVHVTAHRIDPGWKGRIVLEFYNSGKLPLALRPGMLIGALSFEPLSGPALRPYNRREDAKYRDQQGAVASRIDKD-----------------MALTHLLADRITRLSNMLEKGLYERHHTIRLCLLAALAGESVFLMGPPGIAKSLIARRLKHAFLDASAFEYLMTRFSTPEEVFGPLSIQALKDEGRYQRLTHGYLPEAEIVFLDEIWKAGPAILNTLLTAINERRFRNGDHETTIPMRLLIAASNELPDADSGLAALYDRMLIRLRLDNVSSKNNFRSM…					MQNQRIRIRLKAFDHRLIDQSTAEIVETAKRTGAQVRGPIPLPTRKERFTVLISPHVNKDARDQYEIRTHKRLVDIVEPTEKTVDALMRLDLAAGVDVQISLGMPVALLALALSAFAIGTTEFVIMGLLPEVAGNLQVSIPSAGWLISGYALGVAIGAPIMALVTARLPRKRTLLLLMLIFILGNLMCAMAPNYHLLMLARIVTALCHGAFFGIGSVVAASLVAPNRQASAVALMFTGLTLANVLGVPLGTWFGQLYGWRATFWAVGGIGVLAFIGLALSLPVNHEEKPVDLMSEISALANGKLWLSLLMTVCFAAAMFALFSYIAPLLLQVTGISDKGVSWTLFLMGAGLTLGNILGGRLADWKVSFSLLLSFTLIAVFSLVFRWTSSEIWLAEITLF…					MRKRFIAGAVCPECQQKDTLAMWQENNIDVVECVKCGHQMREADKKVTENIRHHEQIIGVFTPKMTEHKDPSAIPEVTPPEEQLTPGTEDKTS-TARNSGTPLAIVAIIIALATGAGSYWYIKQQQSADAQSLSALNDKLNTLQQQSGNAQQQLTEQLSAANQALQDAKLRQETTSKALDTLQEKVTALTGNDSNNWLIAQADYLVKLAGRKLWSDQDATTAAALLKSADGSLAEMNDPSVLNVRRALTQDISSLAAVSQVDYDGIILQLNQLANGVDNLRLADNEDHSNPMDEDSNELSGSLAHWRENLVKSWHDFMDNFITIRRRDNTAQPLLAPNQDIYLRENIRSSLLIAAQAVPRHQQEIYKQSLESVSTWVRAWYDTSDPATKAFLAQIDTLE…					MQLNKLLKGLMLALPVMAVAACSSHKNDNDSGATTGGA-DSAY----GNGAN---GGNMSSDAQARLQMQQLQQNNIVYFGLDKYDILPEFAQMLDQHANFLRSNPSYKVTIEGHADERGTPEYNIALGERRANAVKMYLQGKGVAEDQMSIVSYGKEKPAVLGHDEAAWAKNRRAVLVYMPVALLALALSAFAIGTTEFVIMGLLPEVAGNLQVSIPSAGWLISGYALGVAIGAPIMALVTARLPRKRTLLLLMLIFILGNLMCAMAPNYHLLMLARIVTALCHGAFFGIGSVVAASLVAPNRQASAVALMFTGLTLANVLGVPLGTWFGQLYGWRATFWAVGGIGVLAFIGLALSLPVNHEEKPVDLMSEISALANGKLWLSLLMTVCFAAAMFALF…					-MKFKRQ---IKPYRAAAGGWGSLEATTRYVFESKAVLKNMRNLLRMNKARGFDCPGCAWGD-DNKSTFSFCENGAKAVTWEATRRVVDNDFFAAHSVSRLYLESDYFLEYQGRLTHPLSYNAETDHYEPISWEDAFTLIAQHIGEMDNPDQIELYTSGRASNEASWLYQLFGRMLGTNNFPDCSNMCHEASGTGLKRSIGVGKGTIRLDDFDHADAIFVFGQNPGTNHPRMLHSLRHAADHGAKIVTFNTLRER					MGIFSRFTDIVNANINSLLERAEDPQKLVRLMIQEMEDTLVEVRTTSARALAEKKQLTRRAEQSAAQAVEWQEKAELAIRKDKEDLARAALLEKQKLDALTVSLHQEIAQTDDTLDRMKGEITELENKLTETRARQQALTLRHQAASASRDVRRQLDNGKIDQAMARFESFERRIDHMEAEAESQRFGKPQTLDQQFASLKADDDISQQLAALKEKMQRNDGQMTDNNSALKKAGLKVTLPRLKILEVLQ--EPECHHVSAEDLYKRLIDMGEEIGLATVYRVLNQFDDAGIVTRHNFEGGKSVFELTQQQHHDHLICLDCGKVIEFSDESIEQRQREIATRFGIKLTNHSLYLYGHCTEGDCREDESLHNDKMTDKLTSLRKLTTVVADTGDIAAMKL…					----------------------------MIQTDTRKETLEFNKLQKRLRRNVGNAITDYQMIEDNDVVMACMSGGKDSFAMLDILLSLQKVAPIKFEVIAVNLDQKQPGFPEHILPDYFERLDIPYYIVDKDTYSVVKEKIPEGKTTCGLCSRLRRGTLYSFAEKIGATKIALGHHMDDIVETLFLNMFHGARMKAMPPKLRSDDGRNVVIRPLTYCREKDLISFAEHKDFPIIPCNLCGSQENLQRQSIKSMLT					--LRFIDTHCHYDFPPFEHHETTELARARSAGVEKIIVPAVSQARFAAVMQLADTCSPLYAALGLHPVWSEDHCDD-DIDKLQQWLHQQPEKLVAIGETGLDYFTPALAAQSAKQITFLKAQFALAKRYDLPLILHSRRTHDPLASLLRQAQLPATGVIHGFAGSLSQAMAFVKLGYRIGVGGTITYPRAAKTRHTIASLPLSSLVLETDAPDMPLQGFQGQPNRPEQVAVVCRILAELRLEPEEQIAEVMLANT					MQLNKLLKGLMLALPVMAVAACSSHKNDNDSGATTGGA-DSAY----GNGAN---GGNMSSDAQARLQMQQLQQNNIVYFGLDKYDILPEFAQMLDQHANFLRSNPSYKVTIEGHADERGTPEYNIALGERRANAVKMYLQGKGVAEDQMSIVSYGKEKPAVLGHDEAAWAKNRRAVLVYMDQKRLTHLRQLEAESIHIIREVAAEFSNPVMMYSIGKDSSVMLHLARKAFHPGKLPFPLLHVDTGWKFREMYEFRDRTVKNIGAELLVHRNPEGVAMGINPFVHGSAKHTDIMKTEGLKQALNKYGFDAAFGGARRDEEKSRAKERIYSFRDRFHRWDPKNQRPELWHNYNGQINKGESIRVFPLSNWTELDIWQYIFLENIEIVPLYLAAPRPVLER…
>T_sp_NML_06					>T_sp_NML_06					>T_sp_NML_06					>T_sp_NML_06					>T_sp_NML_06					>T_sp_NML_06					>T_sp_NML_06					>T_sp_NML_06					>T_sp_NML_06					>T_sp_NML_06
--------------------MVTFQTNFGDIVIKTFDDKAPATVANFLEYCREGFYDNTIFHRVINGFMIQGGGFEPGMNQKDTKAEIRNEANNGLKNTRGTLAMARTSAPHSATAQFFINVADNDFLNFRDESMQGWGYCVFAEVVEGMDVVEKIKGVSTGRSGMHQDVPKEDVVINKVIVSE-MNQETSPAQP---SPVSPGIFEVIRKPTLLSRETLAGIVTALALIPEVISFSVVAGVDPKVSLIASVVIC					MRLCDRDIESWLDDGRLDISPRPPVERINGATVDVRLGNQFRTFRGHTAAFIDLSGPKAEVSAALDRVMSEEIILPEGEAFFLHPGELALAVTLESVTLPDDLVGWLDGRSSLARLGLMVHVTAHRIDPGWKGRIVLEFYNSGKLPLALRPGMLIGALSFEPLSGPAARPYNRRQDAKYRDQQGAVASRIDKD-----------------MALTPLLADRITRLSDMLEKGLYERHHVIRLCLLAALAGESVFLMGPPGIAKSLIARRLKYAFRDASAFEYLMTRFSTPEEVFGPLSIQALKDEGRYQRLTKGYLPEAEIVFLDEIWKAGPAILNTLLTAINERRFRNGDNESPIPMRLLIAASNELPEADSGLTALYDRMLIRLCIDNVTNKQNFRNM…					MQNQRIRIRLKAFDHRLIDQSTAEIVETAKRTGAQVRGPIPLPTRKERFTVLISPHVNKDARDQYEIRTHKRLVDIVEPTEKTVDALMRLDLAAGVDVQISLGMPIALLALALSAFAIGTTEFVIMGLLPEVAGNLSVSVPAAGWLISGYALGVAFGAPVMALITARLPRKRTLLLLMLIFILGNLMCALAGDYHWLMLARVVTALCHGAFFGIGSVVAARLVAPHRQASAVALMFTGLTLANVLGVPLGTWFGQLYGWRATFWAVSVIGVLAFIALWVSLPADRQEKPVDLLSEVRALRGGKLWLSLLTTVWFSAAMFALFSYIAPLLLQVTGISQRGVSWTLFLIGAGLTVGNTLGGRLADRNLRLSLILSFSLLTLLSLLFRWTSLTVTLAEITLF…					MAKRFIAGAVCPHCGETDSLALWREHKIDTVECVKCGHQMREADKQVRGKLKHDGQIIGVFTPEMTEHKDPSAMSEATPPEENHSPATAGKKT-SAKNIGTPLAIVAIIIALASAGGSYWYVTQQQKMDSASRDALSQKLSTLMQQSDASRQQLSQQLNDAAQALQNARQHQDASDKELNSLRDRVASLTGNDGSTWLIAQADYLVKLAGRKLWSDQDVITAEALLKSADGSLAEMDDPSVLNVRRALTADISTLSSLSQVDYDGIILKLNQLSDNVDNLRLADDENNESPMDADSKEVSGSLAQWRENLAKSWHDFMDNFITIRRRDNTAEPLLAPNQDIYLRENIRSKLLIASQAVPRHQNDIYRQSLQAVSSWVRAWYDTNAPATKAFLAQIDGLE…					MQLNKMLKGLMLALPVLAVAACSSHKNDNDQTGSTVGA-DSAY---GANGAN---GGNMSSDEQARLQMQQLQQNNIVYFGLDKYDIQPEYAQMLDQHANFLRSNPSYKVTIEGHADERGTPEYNIALGERRASAVKMYLQGKGVSADQMSIVSYGKEKPAVLGHTEAAWAKNRRAVLVYMPIALLALALSAFAIGTTEFVIMGLLPEVAGNLSVSVPAAGWLISGYALGVAFGAPVMALITARLPRKRTLLLLMLIFILGNLMCALAGDYHWLMLARVVTALCHGAFFGIGSVVAARLVAPHRQASAVALMFTGLTLANVLGVPLGTWFGQLYGWRATFWAVSVIGVLAFIALWVSLPADRQEKPVDLLSEVRALRGGKLWLSLLTTVWFSAAMFALF…					-MKFKRQ---IKPYHAAAGGWGSLEATTRFVLDSKAALKNMRNLMRMNKARGFDCPGCAWGD-DNKSTFSFCENGAKAVTWEATRRTVDPAFFASHSVSRLYAESDYFLEYQGRLTHPLSYNAETDHYEPISWEDAFSIIARHIDAMDNQNQIELYTSGRASNEASWLYQLFGRMLGTNNFPDCSNMCHEASGTGLKRSIGVGKGTIRLDDFDSADAIFVFGQNPGTNHPRMLHSLRHAADHGAKIVTFNTLRER					MGIFSRFSDIVNANINSLLERAEDPQKMVRLMIQEMEDTLIEVRTTSARALAEKKQLQRRIDQAQLQSQDWQEKAELALRKDKDDLARAALQEKQKLTAVTETLTQELSQTEESLDRMKTEITELESKLTETRARQQALTLRYQAASTSRDVRRQLDSGKIDQAMARFESFERRIDHMEAEAESQRFGKSPSLDQQFASLREDDEISQQLAALKEKMQRTDGQMTDNNSALKKAGLKVTLPRLKILEVLQ--EPNCHHVSAEDLYKRLIDIGEEIGLATVYRVLNQFDDAGIVTRHNFEGGKSVFELTQQQHHDHLICLDCGKVIEFRDEFIEQRQREIAKRFGIKLSNHSLYLYGHCAEGDCRENEGLHNDDMTDKLTSLRKITTVVADTGDIAAMKL…					----------------------------MNQTDTRKDTLEFNKLQKRLRRNVGNAITDYQMIEENDVVMACMSGGKDSFAMLDILLSLQKVAPINFSVIAVNLDQKQPGFPEHILPEYFEQLDIPYYIVDKDTYSVVKEKIPEGKTTCGLCSRLRRGTLYSFAEKIGATKIALGHHMDDIVETLFLNMFHGARMKAMPPKLRSDDGRNVVIRPLTYCREKDLIRYADHKAFPIIPCNLCGSQENLQRQAIKAMLT					--VSFIDTHCHFDFPPFSEDARQALGRARLAGVSDIIIPSVSADRIDGIAELSQQYRGLWFAVGLHPLWINEHQPQ-DIDRLQQWLAQPAQQLVAIGETGLDLYTPSGVASSERQQSLLQQQLQLARRYDLPLILHSRRSHDLLASMLRKASVPASGVIHGFSGSLQQAQAFVRLGYFIGIGGTITYPRARKTRDTVAALPLSSLVLETDAPDMPLNGFQGQPNRPEQVVQVCNALAELRSEPFELICQTLLANS					MQLNKMLKGLMLALPVLAVAACSSHKNDNDQTGSTVGA-DSAY---GANGAN---GGNMSSDEQARLQMQQLQQNNIVYFGLDKYDIQPEYAQMLDQHANFLRSNPSYKVTIEGHADERGTPEYNIALGERRASAVKMYLQGKGVSADQMSIVSYGKEKPAVLGHTEAAWAKNRRAVLVYMDQKRLTHLRQLEAESIHIIREVAAEFSNPVMMYSIGKDSSVMLHLARKAFYPGTLPFPLLHVDTGWKFREMYEFRDRTVKNIGAELLVHRNPEGVAMGINPFVHGSAKHTDIMKTEGLKQALNKYGFDAAFGGARRDEEKSRAKERIYSFRDRFHRWDPKNQRPELWHNYNGQINKGESIRVFPLSNWTELDIWQYIFLENIEIVPLYLAAERPVLER…
>P_sp_GM01					>P_sp_GM01					>P_sp_GM01					>P_sp_GM01					>P_sp_GM01					>P_sp_GM01					>P_sp_GM01					>P_sp_GM01					>P_sp_GM01					>P_sp_GM01
--------------------MVTFQTNHGDIVIKTFDDKAPATVKNFLEYCAEGFYDNTIFHRVINGFMVQGGGFEPGMKQKDTKADIRNEANNGLKNTKGTLAMARTQAPHSATAQFFINVADNDFLNFRDESLQGWGYCVFAEVVEGMDVVEKIKAVKTGRSGMHQDVPVEDVVIQKVTISE-MSQPTDRATA---VESDITVGRVLRSPALLTRECLAGIITALALIPEVISFSVIAGVDPKVSLVASVVLC					MRLCDRDIEAWLDNGKLAIEPRPPVERINGATVDVRLGNQFRTFSGHTAAFIDLSGPKHEVSAALDRVMSDEIVLPEGEAFFLHPGELALAVTLESVTIPDDLVGWLDGRSSLARLGLMVHVTAHRIDPGWQGRIVLEFYNSGKLPLALRPGMLIGALSFEPLSGPAARPYNRREDAKYRGQQGADASRIDKD-----------------MAQPHLLAERISRLSNALEKGLYERHHAIRLCLLAALSGESVFLLGPPGIAKSLIARRLKYAFQHARAFEYLMTRFSTPEEVFGPLSIQALKDEGRYQRLTKGYLPDAEIVFLDEIWKAGPAILNTLLTAINERRFRNGDSEEKIPMRLLVTASNELPEADSGLEALYDRMLIRLWLDNVHEKQNFRSM…					MSNQRIRIRLKAFDHRLIDQSTAEIVETAKRTGAQVRGPIPLPTRKERFTVLISPHVNKDARDQYEIRTHKRLVDIVEPTEKTVDALMRLDLAAGVDVQISLGMPVALLALALSAFAIGTTEFVIMGLLPDVAGDLQVTIPSAGWLISGYALGVAIGAPIMALLTAKLPRKKTLILLMIIFIIGNVLCALAYTYNLLMLARVVTALCHGAFFGIGAVVAASLVAPSRQASAVALMFTGLTLANVLGVPLGTWFGQMFGWRATFWGVAIIGIFAFIALIVSLPNNKEEQPVHLASEISALANGKLWLSLLMTVFFAAAMFALFSYIAPLLLQVTGISDRGVSWTLFLIGAGLTVGNILGGKLADWKVSFSLILSFVLIALFSLLFSWTSHALWLAEITLF…					MRKQFIAGAVCPHCQEKDTLALWRENNVDVVECVECGHQMREADKQVRDQVRSNEQVIGIFHPEMTEQKASSAMVEETTPA-DNSPSPATKPPRDKKSDGKVLSAVAIVIALAIGAGLYLNGKHQADLQAQTNQNLTEQLSALQQQLGSDKQQLTQQLESANSALQETRTQQDNSAKELETLRDKVATISGNDTRTWLLAQADYLVKLAGRKLWSDQDVTTAAALLKSADTSLADMNDPSVMNVRRALTQDISSLSAVSQVDYDGTILKLNQLSNGVDNLRLADNDSDDSPMDADGGELSSSLHEWRQNLVKSWHNFMDDFITIRRRDNTAQPLLAPNQDVYLRENIRSRLLIAAQAVPRHQDEIYKQSIDAVSTWVRAWYDTNDAATKAFLAQLDELS…					MQLNKVLKGLMLALPVIAVAACSSHKNNNNDQT-GMGANDGAY--GAGAGQN----GNMSSDEQARLQMQQLQQNNIVYFGLDKYDVQSDYAQMLDQHAAFLRGNPSYKVTIEGHADERGTPEYNIALGERRASAVKMYLQGKGVSADQMSIVSYGKEKPAVLGHDEAAYAKNRRAVLVYMPVALLALALSAFAIGTTEFVIMGLLPDVAGDLQVTIPSAGWLISGYALGVAIGAPIMALLTAKLPRKKTLILLMIIFIIGNVLCALAYTYNLLMLARVVTALCHGAFFGIGAVVAASLVAPSRQASAVALMFTGLTLANVLGVPLGTWFGQMFGWRATFWGVAIIGIFAFIALIVSLPNNKEEQPVHLASEISALANGKLWLSLLMTVFFAAAMFALF…					-MKFKRK---IQPYRAAAGGWGSLEATTRFVLDSKAALKNMRNLMRMNKARGFDCPGCAWGD-DNKSTFSFCENGAKAVTWEATRRVVEPEFFAQHSVSTLYQQSDYFLEYQGRLTHPMRYNSATDHYEPISWDDAFALIARHLQAMDHPNQMELYTSGRASNEASWLYQLFGRVMGSNNFPDCSNMCHEASGTGLKRSIGVGKGTIRLDDFDHADAIFVLGQNPGTNHPRMLHSLRHAADHGAKIVTFNTLRER					MGIFSRFADIVNANINSLLERAEDPQKLVRLMIQEMEDTLVEVRSTSARALAEKKQLARRMEQAEIQQAEWQEKAELAINKGKEDLARAALIEKQKLTDLIAALQQESAQVEETLERMKGEIGELEKKLTETRARQQALTLRHQAASSSRDVRRQLDSGKIDDAMARFESFERRIDHMEAEAESQRFGKPKGLDQEFAELKADDEISQQLAALKAKMNRPE--MTDNNSALKKAGLKVTLPRLKILEVLQGPGPESHHVSAEDLYKRLIDMGEEIGLATVYRVLNQFDDAGIVTRHNFEGGKSVFELTQQHHHDHLICLDCGKVIEFSDESIETRQREIATRHGIKLSNHSLYLYGHCALGDCREDDTLHDK-MTDKLTSLRQLTTVVADTGDIAAMKL…					--------------------------MSENQEVTKKEQYNLNKLQKRLRRNVGEAIADFNMIEEGDRIMVCLSGGKDSYTMLEILRNLQQSAPVNFSLVAVNLDQKQPGFPEHILPAYLDELGVEYHIVNEDTYSIVKDKIPEGKTTCSLCSRLRRGILYRTASELGCTKIALGHHRDDILQTMFLNMFYGGKMKGMPPKLMSDDGKHIVIRPLAYCREKDIIRFAEARQFPIIPCNLCGSQPNLQRQVVADMLR					--MKFIDTHCHFDFPPFVDAAPASIARAAQAGVERIIVPSVDASRFALVSQLAQQHDALYAALGLHPINIAQHQEDAHLGELESWLKKPDSKRVAIGEIGLDLYMQE--AQFAKQTRLLDKQLKLAKQYDLPVILHSRRTHDQLAVHLRRHDLPRRGVVHGFAGSQQQAERFIQLGYAIGVGGTITYERASKTRNTIANLPLHSLLLETDAPDMPLQGFQGQPNRPERARNVFDVLCQLRSESPEVIADALWQNS					MQLNKVLKGLMLALPVIAVAACSSHKNNNNDQT-GMGANDGAY--GAGAGQN----GNMSSDEQARLQMQQLQQNNIVYFGLDKYDVQSDYAQMLDQHAAFLRGNPSYKVTIEGHADERGTPEYNIALGERRASAVKMYLQGKGVSADQMSIVSYGKEKPAVLGHDEAAYAKNRRAVLVYMDQNRLTHLRQLEAESIHIIREVAAEFSNPVMMYSIGKDSSVMLHLARKAFYPGTLPFPLLHVDTGWKFREMYEFRDRTVKAMGAELLVHRNPEGVAMGINPFVHGSAKHTDIMKTEGLKQALNKYGFDAAFGGARRDEEKSRAKERIYSFRDRFHRWDPKNQRPELWHNYNGQINKGESIRVFPLSNWTELDIWQYIFLENIEIVPLYLAAPRPVLER…
>E_pyrifoliae					>E_pyrifoliae					>E_pyrifoliae					>E_pyrifoliae					>E_pyrifoliae					>E_pyrifoliae					>E_pyrifoliae					>E_pyrifoliae					>E_pyrifoliae					>E_pyrifoliae
--------------------MVTFQTNHGDIVIKTFDDKAPATVKNFLEYCREGFYDNTIFHRVINGFMIQGGGFEPGMKQKDTKDEIRNEASNGLKNTKGTLAMARTQAPHSATAQFFINVADNDFLNFRDESLQGWGYCVFAEVVEGMDVVEKIKAVSTGRSGMHQDVPKDDVIIQKVTVSEMFNLKDFRAKD-------------------VKNDVLAGAVVSVALIPEATAFSLLAGLSPTIGLHTAFILG					MRLCDRDIEAWLDNGKLGIDPRPPVERINGATVDVRLGNQFRTFRGHTAAFIDLSGPKDEVSAALDRVMSDEIVLPQGDAFFLHPGELALAVTLESVTLPDNLVGWLDGRSSLARLGLMVHVTAHRIDPGWQGRIVLEFYNSGKLPLALRPGMLIGALSFEPLSGPAARPYNSRQDAKYKGQQGAVASRIDKD-----------------MAHSQLLAERISRLSNALEKGLYERHHAIRLCLLAALCGESVFLLGPPGIAKSLIARRLKFAFQHARAFEYLMTRFSTPEEVFGPLSIQALKDEGRYQRLTKGYLPDAEIVFLDEIWKAGPAILNTLLTAINERRFRNGDSEETIPMRLLVTASNELPEADSGLEALYDRMLIRLWLDNVHAKQNFRSL…					MQNQRIRIRLKAFDHRLIDQSTAEIVETAKRTGAQVRGPIPLPTRKERFTVLISPHVNKDARDQYEIRTHKRLVDIVEPTEKTVDALMRLDLAAGVDVQISLGMPVSLLALALCAFAIGTTEFVIIGLLPEVVNDLHISIPSAGWLISGYALGVAIGAPIMALLTARLPRKHALMLLMAIFIVGNMLSSLALSYNLLMLARVVTALCHGAFFGIGAVVAASLVVPGKQASAVALMFTGLTLANVLGVPLGTWVGQTFGWRTTFLCVAVAGVLAFAGLMTSLPAQHDEKAVHLAAEFSALKNGKLWLSLLMSMFFAAAMFSLFSYVAPLLLQVTGISQRGVSWTLFLMGIGLTVGNLLGGKLADWKISFSLILSFSLIAVFSLLFSWTSHSFWPAELTLF…					MRKRFIAGAVCPQCQAKDTLALWRENNVDVVECVKCGHQMREADKQAREQVRSHEQVIGIFHPEMTEHKASSAMVEETTPAVET-STNEPQPPPEARRSGMVPGVVAIAIALAVGAGLYMYGKHQAQRLTAANQTLAAQIAELQQQSISDKQSLVEKLTVQTSALDTARQQQSAMNQQLDELKRKVASISGSDAQTWMLAQADYLVKMAGRKLWSDRDVTSAAALLKSADASLADMNDPSLIGARRALAQDISTLSALSQVDYDGVILKLNQLSNGIDNLRLADNNSDDEPMDADSGALSSSLREWRQNLVKSWHNFMDDFITIRRRDATAEPLLAPNQDVYLRENIRSRLLIAAQAVPRHQDEIYKQSIDTVSAWIRAWYDTNDANTKAYLNQLDDLS…					MQLNKVLKGLMLALPVIAVAACSSHKNNNNDQTNGMGL-DGSA----NSGMN---SGNMSSDEQARLQMQELQKNNIVYFGLDKYDIQSDFAQMLDAHANFLRSNPSYKVTVEGHADERGTPEYNIALGERRASAVKMYLQGKGVADDQISIVSYGKEKPAVLGHDESAYAKNRRAVLVYMPVSLLALALCAFAIGTTEFVIIGLLPEVVNDLHISIPSAGWLISGYALGVAIGAPIMALLTARLPRKHALMLLMAIFIVGNMLSSLALSYNLLMLARVVTALCHGAFFGIGAVVAASLVVPGKQASAVALMFTGLTLANVLGVPLGTWVGQTFGWRTTFLCVAVAGVLAFAGLMTSLPAQHDEKAVHLAAEFSALKNGKLWLSLLMSMFFAAAMFSLF…					-MKFKQS---IKPYQAAAGGWGSLEATTRFVFDSKEVLKNMRNLMRMNKAKGFDCPGCAWGD-DNKSTFSFCENGAKAVTWEATRRHIGADFFAQYSVSALFQQSDYFLEYQGRLTEPLRYNRTTDRYEPISWERAFELIASHIKAMDNPDQMELYTSGRASNEASWLYQLFGRMNGSNNFPDCSNMCHEASGAGLKRSIGVGKGTIHLDDFDHANAIFVFGQNPGTNHPRMLHSLRHAADNGAKIVTFNTLRER					MGIFSRFADIVNANINALLEKAEDPQKLVRLMIQEMEDTLVELRSTSARALAEKKQLLRRIGQAEVQQAEWQQKAELALFKEKEDLARAALIEKQKLTDLLAALQQEASQVEESLARLKGEIGELESKLAETRARQQALTLRHQAAASSRSVRRQLDSGKLDEAMARFESFERRIDHMEAEAESHSFGKQKDLDRQFAELQADDEISQQLAALKAKMNRSDGEMTDNNTALKKAGLKVTLPRLKILEVLQ--EPEGHHVSAEDLYKRLIDMGEEIGLATVYRVLNQFDDAGIVTRHNFEGGKSVFELTQQHHHDHLICLDCGKVIEFSDESIESRQREIATRHGIKLSNHSLYLYGHCALGDCRENETLHDK-MTDKLSSLRQVTTVVADTGDIAAMKL…					--------------------------MPENQQDTKKEQYNLNKLQKRLRRNVGEAIADFNMIEEGDRIMVCLSGGKDSYTMLEILRNLQQSAPVSFSLVAVNLDQKQPGFPAHILPEYLEQLGVEYKIVNEDTYSIVKEKIPEGKTTCSLCSRLRRGILYRTASELGCSKIALGHHRDDILQTLFLNMFYGGKMKGMPPKLMSDDGQHIVIRPLAYCREKDIQRFAIARQYPIIPCNLCGSQPNLQRQVIGDMLR					MTPCFVDTHCHFDFPPFVGDEEASLQRAAQAGVEKMIAVSVSATRFDRVMALAERHYAVYAALGLHPMAVAEHNEQ-SLVALEQHLQRRHHKVVAIGEIGLDLFIDN--PQFERQQALLDAQLRLARDYSLPVILHSRRTHDKLAQQLRRFDLARRGVVHGFAGSEQQALAFIRAGYAIGVGGTITYERASKTRQTIARLPLTSLVLETDSPDMPLQGFQGQPNRPERVRDIWHALCALRDESPQQITETLRENTRTLFGV--------------------VLEEYRKHVAERAAQGIVPKPLDASQMAALVELLKAPPAGEEEFLSDLLTNRVPPGVDEAAYVKAGFLAAVAKGEATSPLVTPEQAVELLGTMQGGYNIHALIDALDDEKLAPLAAES…					MQLNKVLKGLMLALPVIAVAACSSHKNNNNDQTNGMGL-DGSA----NSGMN---SGNMSSDEQARLQMQELQKNNIVYFGLDKYDIQSDFAQMLDAHANFLRSNPSYKVTVEGHADERGTPEYNIALGERRASAVKMYLQGKGVADDQISIVSYGKEKPAVLGHDESAYAKNRRAVLVYMDQKRLTHLRQLEAESIHIIREVAAEFANPVMMYSIGKDSSVMLHLARKAFYPGTLPFPLLHVDTGWKFREMYAFRDRMVKNIGAELLVHRNPEGVAMGINPFVHGSAKHTDIMKTEGLKQALDKYGFDAAFGGARRDEEKSRAKERIYSFRDRFHRWDPKNQRPELWHNYNGQVNKGESIRVFPLSNWTELDIWQYIFLEDIEIVPLYLAAPRPVLER…
>P_wallisii					>P_wallisii					>P_wallisii					>P_wallisii					>P_wallisii					>P_wallisii					>P_wallisii					>P_wallisii					>P_wallisii					>P_wallisii
--------------------MVTFQTNHGDIVIKTFDDKAPATVQNFLDYCREGFYDNTIFHRVINGFMIQGGGFEPGMNQKATKADIRNEANNGLKNTKGTLAMARTQAPHSATAQFFINVADNDFLNFRDESLQGWGYCVFAEVVEGMDVVEKIKAVKTGRSGMHQDVPVDDVVIQKVTVSE-MSHPSDPAAA---AASDITVGRVLRSPALLTRECLAGVITALALIPEVISFSVIAGVDPKVSLVASVVLC					MRLCDRDIEIWLDSGKLAIEPRPPVERINGATVDVRLGNQFRTFSGHTAPFIDLSGPKHEVSAALDRVMSDEIVLPEGEAFFLHPGELALAVTLESVTLPDDLVGWLDGRSSLARLGLMVHVTAHRIDPGWQGRIVLEFYNSGKLPLALRPGMLIGALSFEPLSGPAARPYNRREDAKYRGQQGADASRIDKD---------------VIMAQPHLLAERISRLSNALEKGLYERHHAIRLCLLAALSGESVFLLGPPGIAKSLIARRLKYAFQHARAFEYLMTRFSTPEEVFGPLSIQALKDEGRYQRLTKGYLPDAEIVFLDEIWKAGPAILNTLLTAINERRFRNGDSEEKIPMRLLVTASNELPEADSGLEALYDRMLIRLWLDNVHEKQNFRSM…					MSNQRIRIRLKAFDHRLIDQSTAEIVETAKRTGAQVRGPIPLPTRKERFTVLISPHVNKDARDQYEIRTHKRLVDIVEPTEKTVDALMRLDLAAGVDVQISLGMPVALLALALSAFAIGTTEFVIMGLLPEVAGDLQVTIPSAGWLISGYALGVAIGAPIMALLTAKLPRKRTLILLMIIFIIGNVLCALAYTYNLLMLARVVTALCHGAFFGIGAVVAASLVAPGRQASAVALMFTGLTLANVLGVPLGTWFGQLFGWRATFWGVAIIGIFAFIALIVSLPTNKEEKPVHLASEVSALANGKLWLSLLMTVFFAAAMFALFSYIAPLLLQVTGISDRGVSWTLFLIGAGLTVGNILGGKLADWKVSFSLILSFSLIAIFSLLFSWTSHALWLAEITLF…					MRKRFIAGAVCPHCQEKDTLAMWRENNIDVVECVKCGHQMREADKQARDQVRSTEQVIGIFHPEMTEQKASSAMVEETTPA-DTSPTPANKPPRDKQRDGKVLSAVAIVIALAIGAGLYLNGKHQADLQAQTNQQLSDQLSALQQQLGSDKQQLTQQLTDANTALQEARTQQDNSAKELETLREKVATISGNDTRTWLLAQADYLVKLAGRKLWSDQDVTTAATLLKSADASLAEMNDPSIMNVRRALTQDISSLSAVSQVDYDGIILKLNQLSNGVDNLRLADNDSDDSPMDADGGELSSSLHEWRQNLVKSWHNFMDDFITIRRRDNTAQPLLAPNQDVYLRENIRSRLLIAAQAVPRHQDEIYRQSIDAVSSWVRAWYDTNDAATKAFLAQLDELS…					MQLNKVLKGLMLALPVIAVAACSSHKNNNNDQT-GMGGADGAY--GAGAGQN----GNMSSDEQARLQMQQLQQNNIVYFGLDKYDVQSDYAQMLDQHAAFLRGNPSYKVTIEGHADERGTPEYNIALGERRANAVKMYLQGKGVSADQMSIVSYGKEKPAVLGHDEAAYSKNRRAVLVYMPVALLALALSAFAIGTTEFVIMGLLPEVAGDLQVTIPSAGWLISGYALGVAIGAPIMALLTAKLPRKRTLILLMIIFIIGNVLCALAYTYNLLMLARVVTALCHGAFFGIGAVVAASLVAPGRQASAVALMFTGLTLANVLGVPLGTWFGQLFGWRATFWGVAIIGIFAFIALIVSLPTNKEEKPVHLASEVSALANGKLWLSLLMTVFFAAAMFALF…					-MKFKRK---IQPYRAAAGGWGSLEATTRFVLDSKAALKNMRNLMRMNKARGFDCPGCAWGD-DNKSTFSFCENGAKAVTWEATRRVVEPEFFAQHSVSTLYQQSDYFLEYQGRLTHPMRYNSETDHYEPISWDEAFALIAQHLKAMDHPNQMELYTSGRASNEASWLYQLFGRVMGTNNFPDCSNMCHEASGTGLKRSIGVGKGTIRLDDFDHANAIFVFGQNPGTNHPRMLHSLRHAADHGAKIVTFNTLRER					MGIFSRFADIVNANINSLLERAEDPQKLVRLMIQEMEDTLVEVRSTSARALAEKKQLLRRIEQAEIQQAEWQEKAELAISKEKEDLARSALIEKQKLTDLIAALHQEATQVEETLERMKGEIAELEKKLSETRARQQALTLRHQAASSSRDVRRQLDSGKLDEAMARFESFERRIDHMEAEAESQRFGKPKSLDQEFAELKADDEISQQLAALKAKMNRSE--MTDNNSALKKAGLKVTLPRLKILEVLQGPGPESHHVSAEDLYKRLIDMGEEIGLATVYRVLNQFDDAGIVTRHNFEGGKSVFELTQQHHHDHLICLDCGKVIEFSDESIETRQREIATRHGIKLSNHSLYLYGHCALGDCREDDTLHDQ--------LRQLTTVVADTGDIAAMKL…					--------------------------MSENQEVNKKEQYNLNKLQKRLRRNVGEAIADFNMIEEGDRIMVCLSGGKDSYTMLEILRNLQQSAPVNFSLIAVNLDQKQPGFPEHILPAYLDELGVEYKIVNEDTYSIVKEKIPEGKTTCSLCSRLRRGILYRTATELGCTKIALGHHRDDILQTLFLNMFYGGKMKGMPPKLMSDDGKHIVIRPLAYCREKDIIRFAEARQFPIIPCNLCGSQPNLQRQVVADMLR					--MKFIDTHCHFDFPPFVDDAENSIARAAQAGVEHIIVPCVDASRFALVSQLAQQHAALYAALGLHPINIAQHQED-HLDRLEQHLQTADAKRVAIGEIGLDLYMND--PDFDKQTRLLDAQLKLAKRYDLPVILHSRRTHDQLAMHLRRHDVPRRGVVHGFAGSQQQAERFIQLGYAIGVGGTITYERASKTRNTIASLPLDALLLETDAPDMPLHGFQGQPNRPERARNVFEVLCQLRSEPPAEIADALWHNS					MQLNKVLKGLMLALPVIAVAACSSHKNNNNDQT-GMGGADGAY--GAGAGQN----GNMSSDEQARLQMQQLQQNNIVYFGLDKYDVQSDYAQMLDQHAAFLRGNPSYKVTIEGHADERGTPEYNIALGERRANAVKMYLQGKGVSADQMSIVSYGKEKPAVLGHDEAAYSKNRRAVLVYMDQNRLTHLRQLEAESIHIIREVAAEFSNPVMMYSIGKDSSVMLHLARKAFYPGTLPFPLLHVDTGWKFREMYAFRDRTVKNMGAELLVHRNPEGVAMGINPFVHGSAKHTDIMKTEALSRHSTNMGLMLP-SVARAAMKRSRVLKSVST--------------------HSATVSTAGTRKTNVLSC-------------------------------…
>P_agglomerans					>P_agglomerans					>P_agglomerans					>P_agglomerans					>P_agglomerans					>P_agglomerans					>P_agglomerans					>P_agglomerans					>P_agglomerans					>P_agglomerans
--------------------MVTFQTNHGDIVIKTFDDKAPATVKNFLDYCREGFYDNTIFHRVINGFMIQGGGFEPGMKQKETKAEIQNEASNGLKNTKGTLAMARTSAPHSATAQFFINVADNDFLNFRDESVQGWGYCVFAEVVEGMDVVEKIKAVSTGRSGMHQDVPKDDVVIQKVTVSE-MTQTNDIAAT-DVVAGDISVGRVLRSPALLTRECLAGVITALALIPEVISFSVIAGVDPKVSLVASVVLC					MRLCDRDIEAWLDNGKLAIEPRPPVERINGATVDVRLGNQFRTFSGHTAAFIDLSGPKQEVSAALDRVMSDEIVLPDGEAFFLHPGELALAVTLESVTLPDDLVGWLDGRSSLARLGLMVHVTAHRIDPGWQGRIVLEFYNSGKLPLALRPGMLIGALSFEPLSGPAARPYNRREDAKYRGQQGADASRIDKD-----------------MAQPHLLAERISRLSNALEKGLYERHHAIRLCLLAALSGESVFLLGPPGIAKSLIARRLKYAFQHARAFEYLMTRFSTPEEVFGPLSIQALKDEGRYQRLTKGYLPDAEIVFLDEIWKAGPAILNTLLTAINERRFRNGDSEEAIPMRLLVTASNEMPEADSGLEALYDRMLIRLWLDNVHEKQNFRSM…					MQNQRIRIRLKAFDHRLIDQSTAEIVETAKRTGAQVRGPIPLPTRKERFTVLISPHVNKDARDQYEIRTHKRLVDIVEPTEKTVDALMRLDLAAGVDVQISLGMPVALMALALSAFAIGTTEFVIMGLLPEVARDLQVSIPSAGWLISGYALGVAIGAPIMALLTARLPRKKTLILLMVIFIVGNLLCALAYNYNLLMLARIVTALCHGAFFGIGAVVAASLVPAGRQASAVALMFTGLTLANVLGVPLGTSFGQMFGWRATFWGVAVIGVLAFIALIVSLPNNKQEKPVHLASEIGALANGKLWLSLLMTVFFAAAMFALFSYIAPLLLEVTGISDRGVSWTLFLIGAGLTVGNILGGKLADWKVSFSLILSFSLIAIFSLLFSWTSHALWLAEITLF…					MRKRFIAGATCPHCQEKDTLAMWRENNVDVVECVKCGHQMREADKQARDQVRTNEQVIGIFHPEMTEQKDSSAMVEETTPAVDRSPSSNSTPPRNAKNGGMVLGAVAIVIALAIGAGLYLNGKHQADLQAQTNQKLSEQLSALQQQASSDKQQLTQQLSGAETALQTAQTQQNASAKELETLREKVAVISGNDVRSWLLAQADYLVKLAGRKLWSDQDVTTAAALLKSADASLADMNDPSVMNVRRALTQDISNLSSVTQVDYDGVILKLNQLSNNVDNLRLADNDSDDAPMDSDGGELSGSVREWRQNLVKSWHNFMDDFITIRRRDNTAQPLLAPNQDVYLRENIRSRLLIAAQAVPRHQDEIYKQSIDTVSAWVRAWYDTNDAATKAFLAQLDELS…					MQLNKVLKGLMLALPVLAVAACSSHKNNNNDQT-GMGADGGAY--GANSGMNGN-GGNMSSDEQARLQMQQLQQNNIVYFGLDKYDVQSDYAQMLDQHATFLRSNPSYKVTIEGHADERGTPEYNIALGERRANAVKMYLQGKGVSADQMSIVSYGKEKPAVLGHDEAAYSKNRRAVLVYMPVALMALALSAFAIGTTEFVIMGLLPEVARDLQVSIPSAGWLISGYALGVAIGAPIMALLTARLPRKKTLILLMVIFIVGNLLCALAYNYNLLMLARIVTALCHGAFFGIGAVVAASLVPAGRQASAVALMFTGLTLANVLGVPLGTSFGQMFGWRATFWGVAVIGVLAFIALIVSLPNNKQEKPVHLASEIGALANGKLWLSLLMTVFFAAAMFALF…					-MKFKRQ---IKPYRAAAGGWGSLEATTRFVLDSKAALKNMRNLMRMNKARGFDCPGCAWGD-DNKSTFSFCENGAKAVTWEATRRMVDTDFFAKHSVTTLYTQSDYFLEYQGRLTHPLRYNAETDHYEPISWDDAFALIAQHIKAMDHPDQMELYTSGRASNEASWLYQLFGRLMGTNNFPDCSNMCHEASGTGLKRSIGVGKGTIRLDDFDHADAIFVFGQNPGTNHPRMLHSLRHAADHGAKIVTFNTLRER					MGIFSRFADIVNANINSLLERAEDPQKLVRLMIQEMEDTLVEVRSTSARALAEKKQLSRRIDQAEIQQAEWQEKAELALRKDKDDLARSALIEKQKLTDLIASLKQEVGHVEETLERMKGEISELEKKLSETRARQQALTLRHQAASSSRDVRRQLDSGKIDEAMARFESFERRIDHMEAEAESHGFGKPKTLNQEFTDLKADDEISEQLNALKAKMNRSE--MTDNNTALKKAGLKVTLPRLKILEVLQ--EPECHHVSAEDLYKRLIDIGEEIGLATVYRVLNQFDDAGIVTRHNFEGGKSVFELTQQHHHDHLICLDCGKVIEFSDESIETRQREIATRHGIKLTNHSLYLYGHCTLGDCREDETLHDQ-MTDKLTSLRQLTTVVADTGDIAAMKL…					--------------------------MQDNQTVDKKEQYNLNKLQKRLRRNVGEAIADFNMIEEGDRIMVCLSGGKDSYTMLEILRSLQKSAPVNFSLIAVNLDQKQPGFPEHILPEYLESQGVEYRIIEEDTYSIVKDKIPEGKTTCSLCSRLRRGILYRVATELGCTKIALGHHRDDILQTLFLNMFYGGKMKGMPPKLMSDDGKQIVIRPLAYCREKDIIRFSEARQFPIIPCNLCGSQPNLQRQVVADMLR					--MKFIDTHCHFDFPPFEGDISGSLARAAEAGVEKIIVPAIDASRFERVCALAAAQPALYAALGLHPIVIENHQEA-HLDQLETLLQQRPRKLVAIGEIGLDLYRDD--PQFDKQQRFLEAQLKLAKAYQLPVILHSRRTHDKLAQILRRYDLPRRGVVHGFAGSLQQAQAFIKLGYAIGIGGTITYERASKTRQTVAQLPLSSLLLETDAPDMPLQGFQGQPNRPERARQVWEVLCSLREESPEEIADALWHNS					MQLNKVLKGLMLALPVLAVAACSSHKNNNNDQT-GMGADGGAY--GANSGMNGN-GGNMSSDEQARLQMQQLQQNNIVYFGLDKYDVQSDYAQMLDQHATFLRSNPSYKVTIEGHADERGTPEYNIALGERRANAVKMYLQGKGVSADQMSIVSYGKEKPAVLGHDEAAYSKNRRAVLVYMDQKRLTHLRHLEAESIHIIREVAAEFSNPVMMYSIGKDSSVMLHLARKAFYPGTLPFPLLHVDTGWKFREMYEFRDRTVKAMGAELLVHRNPEGVAMGINPFVHGSAKHTDIMKTEGLKQALNKYGFDAAFGGARRDEEKSRAKERIYSFRDRFHRWDPKNQRPELWHNYNGQINKGESIRVFPLSNWTELDIWQYIFLENIEIVPLYLAAPRPVLER…
>P_s_stewartii					>P_s_stewartii					>P_s_stewartii					>P_s_stewartii					>P_s_stewartii					>P_s_stewartii					>P_s_stewartii					>P_s_stewartii					>P_s_stewartii					>P_s_stewartii
--------------------MVTFQTNHGDIVIKTFDDKAPATVKNFLDYCREGFYDNTIFHRVINGFMIQGGGFEPGMKQKATKEEIRNEANNGLKNTKGTLAMARTSAPHSATAQFFINVADNDFLNFRDESLQGWGYCVFAEVVEGMDVVEKIKAVSTGRSGMHQDVPKDDVIIQKVTVSE--LLSSMRKDW---------LGN-------VRGDVLAGIVVALALIPEAIAFSIIAGVDPQVGLYSAFCIP					MRLCDRDIEAWLDTGKLAITPRPTVEHINGATVDVRLGNQFRTFSGHTAPFIDLSGPKHEVSAALDRVMSDEIVLPEGEAFFLHPGELALAVTLESVTIPDDLVGWLDGRSSLARLGLMVHVTAHRIDPGWQGRIVLEFYNSGKLPLALRPGMLIGALSFEPLSGPAARPYNRRENAKYRGQQGADASRIDKD-----------------MAQPHLLAERISRLSNALEKGLYERHHAIRLCLLAALSGESVFLLGPPGIAKSLIARRLKCAFQHARAFEYLMTRFSTPEEVFGPLSIQALKDEGRYQRLTKGYLPDAEIVFLDEIWKAGPAILNTLLTAINERRFRNGDSEEKIPMRLLVTASNELPEADSGLEALYDRMLIRLWLDNVHEKQNFRSM…					MSNQRIRIRLKAFDHRLIDQSTAEIVETAKRTGAQVRGPIPLPTRKERFTVLISPHVNKDARDQYEIRTHKRLVDIVEPTEKTVDALMRLDLAAGVDVQISLGMPVALLALALSAFAIGTTEFVIMGLLPEVANDLQVTIPSAGWLISGYALGVAIGAPVMALLTAKLPRKKTLILLMAIFIIGNLLCALAYSYNLLMLARVITALCHGAFFGIGAVVAASLVAADRQASAVALMFTGLTLANVLGVPLGTWFGQLFGWRATFWGVAVIGVLAFIALITSLPGNKNEKPVNLASEISALANGKLWLSLLMTVCFAAAMFTLFSYIAPLLLQVTGISDHGVSWTLFLIGAGLTAGNILGGKLADRNVALSLTGSFLLIALFSLLFSWTSHALWLAEITLF…					MRKRFIAGAVCPHCQEKDTLAMWRENNVDVVECVKCGHQMREADKQARDQVRSNEQVIGIFHPEMTEQKDTSAVVEETTPAVDRDASLQEQPPRKQKNGGMVLGAVAIVIALAIGAGLYLNDKHQAELQAQTNQSLSEQLAKLQQQANSDKQQLSQQLSTTEKTLETAQAQQAASEKALQALREKLASISGNDVRSWLVAQADYLVKLAGRKLWSDQDVTTAAALLKSADASLADMNDPSVMNVRRALTQDISTLSAISQVDYDGIILKLNQLSNNVDNLRLADNDSDDAPMDSDNGELSGSIREWRQNLVKSWHNFMDDFITIRRRDNTAQPLLAPNQDVYLRENIRSRLLIAAQAVPRHQEEIYKQSLETVSTWVRAWYDTNDASTKAFLAQLDELS…					MQLNKVLKGLMLALPIMAVAACSSHKNNNNDQS-GAGA-DGAY--GANSGMN---NGNMSSDEQARLQMQQLQQNNIVYFGLDKYDVQPDYAQMLDQHANFLRSNPSYKVTIEGHADERGTPEYNIALGERRANAVKMYLQGKGVSADQMSIVSYGKEKPAVLGHDEAAYAKNRRAVLVYMPVALLALALSAFAIGTTEFVIMGLLPEVANDLQVTIPSAGWLISGYALGVAIGAPVMALLTAKLPRKKTLILLMAIFIIGNLLCALAYSYNLLMLARVITALCHGAFFGIGAVVAASLVAADRQASAVALMFTGLTLANVLGVPLGTWFGQLFGWRATFWGVAVIGVLAFIALITSLPGNKNEKPVNLASEISALANGKLWLSLLMTVCFAAAMFTLF…					-MKFKRQ---IKPYRAAAGGWGSLEATTRFVFDSKAALKNLRNLMRMNKARGFDCPGCAWGD-DNKSTFSFCENGAKAVTWEATRRVVDADFFAKHSVTTLYAQSDYFLEYQGRLTHPLRYNRETDHYEPISWDDAYALIAQHIKAMDNPDQMELYTSGRASNEASWLYQLFGRMLGTNNFPDCSNMCHEASGAGLKRSIGVGKGTIRLDDFDHADAIFVFGQNPGTNHPRMLHSLRHAADHGAKIVTFNTLRER					MGIFSRFADIVNANINSLLERAEDPQKLVRLMIQEMEDTLVEVRSTSARALAEKKQLSRRIEQAELQQAEWQEKAELAIRKDKEDLARSALIEKQKLTDLIASLKREVEQVDETLTRMKGEIAELEKKLSETRARQQALTLRHQAASSSRDVRRQLDSGKIDEAMARFESFERRIDHMEAEAESHGFGKPKTLDQQFTELKADDEISQQLNALKAKMNRSE--MTDNNTALKKAGLKVTLPRLKILEVLQ--EPACHHVSAEDLYKRLIDMGEEIGLATVYRVLNQFDDAGIVTRHNFEGGKSVFELTQQHHHDHLICLDCGKVIEFSDESIETRQRDIATRHGIKLTNHSLYLYGHCALGDCHEDETLHDK-MTDKLTSLRQLTTVVADTGDIAAMKL…					--------------------------MLQNQEINKKEQYNLNKLQKRLRRHVGEAIADFNMIEEGDRIMVCLSGGKDSYTMLEILRSLQKSAPVSFSLVAVNLDQKQPGFPGHILPEYLEAQGVEYKIVEEDTYSIVKEKIPEGKTTCSLCSRLRRGILYRTATELGCTKIALGHHRDDILQTLFLNMFYGGKMKGMPPKLMSDDGKHIVIRPLAYCREKDIIRFSEARQFPIIPCNLCGSQPNLQRQVVADMLR					--MRFVDTHCHFDFPPFVDAADVSLRQAADAGVEKIIVPSVEAGRFDLVCQLARQHRALYAALGLHPIVTEQHEEQ-HLAQLESLLQQRPPKLVALGEIGLDLYRDD--PQFDKQTCFLDAQLKLAKRYDLPVILHSRRTHDQLALHLRRQAVPRRGVVHGFAGSLQQAQAFIKLGYAIGVGGTITYPRASKTRQTIARLPLSSLLLETDAPDMPLNGYQGQPNRPERAVLVWQVLCELRDEPPAEIADALWHNS					MQLNKVLKGLMLALPIMAVAACSSHKNNNNDQS-GAGA-DGAY--GANSGMN---NGNMSSDEQARLQMQQLQQNNIVYFGLDKYDVQPDYAQMLDQHANFLRSNPSYKVTIEGHADERGTPEYNIALGERRANAVKMYLQGKGVSADQMSIVSYGKEKPAVLGHDEAAYAKNRRAVLVYMDQKRLTHLRQLEAESIHIIREVAAEFGNPVMMYSIGKDSSVMLHLARKAFYPGTLPFPLLHVDTGWKFREMYEFRDRTVKAMGAELLVHRNPEGVAMGINPFVHGSAKHTDIMKTEGLKQALNKYGFDAAFGGARRDEEKSRAKERIYSFRDRFHRWDPKNQRPELWHNYNGQINKGESIRVFPLSNWTELDIWQYIFLENIEIVPLYLAAPRPVLER…
>P_cypripedii					>P_cypripedii					>P_cypripedii					>P_cypripedii					>P_cypripedii					>P_cypripedii					>P_cypripedii					>P_cypripedii					>P_cypripedii					>P_cypripedii
-------------------MMVTFQTNHGDIVIKTFDDKAPATVKNFLDYCRDGFYDNTIFHRVINGFMIQGGGFEPGMKQKATKEEIRNEANNGLKNTRGTLAMARTQAPHSATAQFFINVADNDFLNFRDESLQGWGYCVFAEVVEGMDVVEKIKAVATGRSGMHQDVPKDDVIIQKVTVSEMSHLTEDLT-----------VSRVLRSPALLTRECLAGIITALALIPEVISFSVIAGVDPKVSLVASVVLC					MRLCDRDIETWLDSGKLAISPRPPVERINGATVDVRLGNQFRTFRGHTAAFIDLSGPKHEVSAALDRVMSDEIVLPEGEAFFLHPGELALAVTLESVTLPDDLVGWLDGRSSLARLGLMVHVTAHRIDPGWQGRIVLEFYNSGKLPLALRPGMLIGALSFEPLSGPAARPYNRREDAKYRGQQGADASRIDKDMRSPECVAQDQKDNDVIMAQPHLLAERISRLSNALEKGLYERHHAIRLCLLAALSGESVFLLGPPGIAKSLIARRLKYAFQHARAFEYLMTRFSTPEEVFGPLSIQALKDEGRYQRLTKGYLPDAEIVFLDEIWKAGPAILNTLLTAINERRFRNGDSEEKIPMRLLVTASNELPEADSGLEALYDRMLIRLWLDNVHEKQNFRSM…					MQNQRIRIRLKAFDHRLIDQSTAEIVETAKRTGAQVRGPIPLPTRKERFTVLISPHVNKDARDQYEIRTHKRLVDIVEPTEKTVDALMRLDLAAGVDVQISLGMPVALLALALSAFAIGTTEFVIMGLLPEVAGDLQVSIPSAGWLISGYALGVAIGAPIMALLTAKLPRKRTLVLLMCIFIVGNVLCALAYSYNLLMLARIVTALCHGAFFGIGSVVAASLVAPSRQASAVALMFTGLTLANVLGVPLGTWFGQMFGWRATFWGVAIIGIFAFIALIVSLPTNKDEKPVHLASEVSALANGKLWLSLLMTVFFAAAMFALFSYIAPLLLQVTGITDRGVSWTLFLIGAGLTVGNILGGKLADWKVSFSLILSFSLIAVLSLLFSWTSHALWLAEITLF…					MRKRFIAGAVCPHCQQKDTLAMWRENNVDVVECVKCGHQMREADKQVRDQVRSQEQVIGIFHPEMTEQKASSAMVDETTPAGDNATPPAGKPPRNKKSDGKVLGAVAIVIALAIGAGLYLNGKHQADLQAQTNQDLNEQLSALQQQLGSDKQQLTQQLESANSALQEARNQQDASAKELEALRQKVATISGNDTRTWLLAQADYLVKLAGRKLWSDQDVTTAAALLKSADTSLAEMNDPSVMNVRRALTQDISSLSAVSQVDYDGIILKLNQLSNGVDNLRLADNDSDDSPMDADGGELSGSLHEWRQNLAKSWHNFMDDFITIRRRDNTAQPLLAPNQDVYLRENIRSRLLIAAQAVPRHQDEIYKQSIDAVSTWVRAWYDTNDAATKTFLDQLDELS…					MQLNKVLKGLMLALPVIAVAACSSHKNNNNDQT-GMGA-DGAN----GSGMN---SGNMSSDEQARLQMQQLQQNNIVYFGLDKYDVQSEYAQMLDQHAAFLRSNPSYKVTIEGHADERGTPEYNIALGERRATAVKMYLQGKGVSADQMSIVSYGKEKPAVLGHDEAAYAKNRRAVLVYMPVALLALALSAFAIGTTEFVIMGLLPEVAGDLQVSIPSAGWLISGYALGVAIGAPIMALLTAKLPRKRTLVLLMCIFIVGNVLCALAYSYNLLMLARIVTALCHGAFFGIGSVVAASLVAPSRQASAVALMFTGLTLANVLGVPLGTWFGQMFGWRATFWGVAIIGIFAFIALIVSLPTNKDEKPVHLASEVSALANGKLWLSLLMTVFFAAAMFALF…					-----------------------LEATTRFVFDSKAALKNMRNLLRMNKARGFDCPGCAWGD-DNKSTFSFCENGAKAVTWEATRRVVEPAFFAQHSVSTLYQQSDYFLEYQGRLTHPLRYNRDTDHYEPISWDDAFALIASHLQAMDHPDQMELYTSGRASNEASWLYQLFGRVMGTNNFPDCSNMCHEASGSGLKRSIGVGKGTIRLDDFDHADAIFVFGQNPGTNHPRMLHSLRHAADHGARIVTFNTLRER					MGIFSRFADIVNANINSLLERAEDPQKLVRLMIQEMEDTLVEVRSTSARALAEKKQLLRRIEQADIQQAEWQEKAELALRKDKDDLARAALIEKQKLTDLIAALQQEVSQVEETLERMKGEIGELEKKLSETRARQQALTLRHQAASSSRDVRRQLDSNKLNDAMARFESFERRIDHMEAEAESQRFGKPKSLDQEFTELKADDEISQQLAALKAKMNRSE--MTDNNSALKKAGLKVTLPRLKILEVLQ--EPECHHVSAEDLYKRLIDMGEEIGLATVYRVLNQFDDAGIVTRHNFEGGKSVFELTQQHHHDHLICLDCGKVIEFSDESIETRQREIATRHGIKLTNHSLYLYGHCALGDCREDETLHDKQMTDKLTSLRQLTTVVADTGDIAAMKL…					--------------------------MSENQEVTKKEQYNLNKLQKRLRRNVGEAIADFNMIEEGDRIMVCLSGGKDSYTMLEILRNLQQSAPVNFSLVAVNLDQKQPGFPEHILPAYLDNLGVEYKIVNEDTYSIVKEKIPEGKTTCSLCSRLRRGILYRTATELGCTKIALGHHRDDILQTLFLNMFYGGKMKGMPPKLMSDDGKHIVIRPLAYCREKDIIRFSEARQFPIIPCNLCGSQPNLQRQVVADMLR					--MRFIDTHCHFDFPPFVDDAQASIQRAAQAGVERIIVPSVDASRFALVSQLAQQHPALYAALGLHPIQIAVHQEM-HIDQLAEHLRQPDTKRVALGEIGLDLYMDD--PQFDKQTRLLDGQLKLAKQYDLPVILHSRRTHDQLALHLRRHDLPRRGVVHGFAGSLQQAQRFIQLGYAIGVGGTITYERASKTRNTIAELPLDSLLLETDAPDMPLNGYQGEPNRPERARLVFEVLCQLRSEPADVIASALWQNS					MQLNKVLKGLMLALPVIAVAACSSHKNNNNDQT-GMGA-DGAN----GSGMN---SGNMSSDEQARLQMQQLQQNNIVYFGLDKYDVQSEYAQMLDQHAAFLRSNPSYKVTIEGHADERGTPEYNIALGERRATAVKMYLQGKGVSADQMSIVSYGKEKPAVLGHDEAAYAKNRRAVLVYMDQNRLTHLRQLEAESIHIIREVAAEFSNPVMMYSIGKDSSVMLHLARKAFYPGTLPFPLLHVDTGWKFREMYEFRDRTVKAMGAELLVHRNPEGVAMGINPFVHGSAKHTDIMKTEGLKQALNKYGFDAAFGGARRDEEKSRAKERIYSFRDRFHRWDPKNQRPELWHNYNGQINKGESIRVFPLSNWTELDIWQYIFLENIEIVPLYLAAPRPVLER…
>P_vagans					>P_vagans					>P_vagans					>P_vagans					>P_vagans					>P_vagans					>P_vagans					>P_vagans					>P_vagans					>P_vagans
--------------------MVTFQTNHGDIVIKTFDDKAPATVQNFLDYCREGFYDNTIFHRVINGFMIQGGGFEPGMKQKATKDEIQNEANNGLKNTKGTLAMARTSAPHSATAQFFINVADNDFLNFRDESVQGWGYCVFAEVVEGMDVVEKIKAVSTGRSGMHQDVPKDDVVIQKVTVSE-MTQTNDVAAT-DVVAGDISVGRVLRSPALLTRECLAGVITALALIPEVISFSVIAGVDPKVSLVASVVLC					MRLCDRDIEAWLDTGKLAIEPRPPVERINGATVDVRLGNQFRTFSGHTAAFIDLSGPKQEVSAALDRVMSDEIVLPDGEAFFLHPGELALAVTLESVTLPDDLVGWLDGRSSLARLGLMVHVTAHRIDPGWQGRIVLEFYNSGKLPLALRPGMLIGALSFEPLSGPAARPYNRREDAKYRGQQGADASRIDKD-----------------MAQPHLLAERISRLSNALEKGLYERHHAIRLCLLAALSGESVFLLGPPGIAKSLIARRLKYAFQHARAFEYLMTRFSTPEEVFGPLSIQALKDEGRYQRLTKGYLPDAEIVFLDEIWKAGPAILNTLLTAINERRFRNGDSEETIPMRLLVTASNELPEADSGLEALYDRMLIRLWLDNVHEKQNFRSM…					MQNQRIRIRLKAFDHRLIDQSTAEIVETAKRTGAQVRGPIPLPTRKERFTVLISPHVNKDARDQYEIRTHKRLVDIVEPTEKTVDALMRLDLAAGVDVQISLGMPVALMALALSAFAIGTTEFVIMGLLPEVARDLQVSIPSAGWLISGYALGVAIGAPIMALLTARLPRKKTLILLMVIFIVGNLLCALAYNYNLLMLARIVTALCHGAFFGIGAVVAASLVPAGRQASAVALMFTGLTLANVLGVPLGTSFGQMFGWRATFWGVAVIGVLAFIALIVSLPNNKEEKPVHLASEIDALANGKLWLSLLMTVFFAAAMFALFSYIAPLLLEVTGISDRGVSWTLFLIGAGLTVGNILGGKLADWKVSFSLILSFSLIAIFSLLFSWTSHALWLAELTLF…					MRKRFIAGATCPHCQEKDTLAMWRENNVDVVECVKCGHQMREADKQTRDQVRTNEQVIGIFHPEMTEQKDSSAMVEETTPAVDRSPSSNSTPPRNAKNGGMVLGAVAIVIALAIGAGLYLNGKHQADLQAQTNQKLSDQLSALQQQASSDKQQLTQQLSGAETALQTAQQQQTASAKELETLREKVAVISGNDVRSWLLAQADYLVKLAGRKLWSDQDVTTAAALLKSADASLADMNDPSVMNVRRALTQDISNLSSVTQVDYDGVILKLNQLSNNVDNLRLADNDSDDAPMDSDGGELSGSVREWRQNLVKSWHNFMDDFITIRRRDNTAQPLLAPNQDVYLRENIRSRLLIAAQAVPRHQDEIYKQSIDTVSAWVRAWYDTNDAATKAFLAQLDELS…					MQLNKVLKGLMLALPVLAVAACSSHKNNNNDQT-GMGA-DGAY--GANSGMNGN-GGNMSSDEQARLQMQQLQQNNIVYFGLDKYDVQSDYAQMLDQHATFLRSNPSYKVTIEGHADERGTPEYNIALGERRANAVKMYLQGKGVSADQMSIVSYGKEKPAVLGHDEAAYSKNRRAVLVYMPVALMALALSAFAIGTTEFVIMGLLPEVARDLQVSIPSAGWLISGYALGVAIGAPIMALLTARLPRKKTLILLMVIFIVGNLLCALAYNYNLLMLARIVTALCHGAFFGIGAVVAASLVPAGRQASAVALMFTGLTLANVLGVPLGTSFGQMFGWRATFWGVAVIGVLAFIALIVSLPNNKEEKPVHLASEIDALANGKLWLSLLMTVFFAAAMFALF…					-MKFKRQ---IKPYRAAAGGWGSLEATTRFVLDSKAALKNMRNLMRMNKARGFDCPGCAWGD-DNKSTFSFCENGAKAVTWEATRRMVDSDFFAKHSVTTLYTQSDYFLEYQGRLTHPLRYNAETDHYEPISWDDAFALIAQHIKAMDHPDQMELYTSGRASNEASWLYQLFGRLMGTNNFPDCSNMCHEASGTGLKRSIGVGKGTIRLDDFDHADAIFVFGQNPGTNHPRMLHSLRHAADHGAKIVTFNTLRER					MGIFSRFADIVNANINSLLERAEDPQKLVRLMIQEMEDTLVEVRSTSARSLAEKKQLSRRIEQAELQQADWQEKAELALRKDKDDLARSALIEKQKLTDLIASLKQEVGQVEETLERMKGEISELEKKLTETRARQQALTLRHQAASSSRDVRRQLDSGKIDEAMARFESFERRIDHMEAEAESHGFGKPKTLDQQFTDLKADDEISQQLNALKAKMNRSE--MTDNNTALKKAGLKVTLPRLKILEVLQ--EPECHHVSAEDLYKRLIDIGEEIGLATVYRVLNQFDDAGIVTRHNFEGGKSVFELTQQHHHDHLICLDCGKVIEFSDESIETRQREIATRHGIKLTNHSLYLYGHCTLGDCREDETLHDQ-MTDKLTSLRQLTTVVADTGDIAAMKL…					--------------------------MQDNQTVDKKEQYNLNKLQKRLRRNVGEAIADFNMIEEGDRIMVCLSGGKDSYTMLEILRSLQKSAPVNFSLIAVNLDQKQPGFPEHILPQYLESQGVEYRIVEEDTYSIVKDKVPEGKTTCSLCSRLRRGILYRVATELGCTKIALGHHRDDILQTLFLNMFYGGKLKGMPPKLMSDDGKQIVIRPLAYCREKDIIRFSEARQFPIIPCNLCGSQPNLQRQVVADMLR					--MTFIDTHCHFDFPPFEGDVAASLTRAAEAGVEKIIIPAIDASRFERVCALAAGHPPLYAALGLHPIVIENHLEA-HLEQLETLLQQRPRKLVAIGEIGLDLYRDN--PQFDKQQRFLEAQLKLAKQYQLPVILHSRRTHDKLAQILRRLDLPRRGVVHGFAGSLQQAQAFIKLGYAIGIGGTITYERASKTRQTVAQLPLSSLLLETDAPDMPLQGFQGQPNRPERARQVWEVLCSLREESPEEIADALWHNS					MQLNKVLKGLMLALPVLAVAACSSHKNNNNDQT-GMGA-DGAY--GANSGMNGN-GGNMSSDEQARLQMQQLQQNNIVYFGLDKYDVQSDYAQMLDQHATFLRSNPSYKVTIEGHADERGTPEYNIALGERRANAVKMYLQGKGVSADQMSIVSYGKEKPAVLGHDEAAYSKNRRAVLVYMDQKRLTHLRQLEAESIHIIREVAAEFSNPVMMYSIGKDSSVMLHLARKAFYPGTLPFPLLHVDTGWKFREMYAFRDRTVKAMGAELLVHRNPEGVAMGINPFVHGSAKHTDIMKTEGLKQALNKYGFDAAFGGARRDEEKSRAKERIYSFRDRFHRWDPKNQRPELWHNYNGQINKGESIRVFPLSNWTELDIWQYIFLENIEIVPLYLAAPRPVLER…
>P_ananatis					>P_ananatis					>P_ananatis					>P_ananatis					>P_ananatis					>P_ananatis					>P_ananatis					>P_ananatis					>P_ananatis					>P_ananatis
--------------------MVTFQTNHGDIVIKTFDDKAPATVKNFLDYCREGFYDNTIFHRVINGFMIQGGGFEPGMKQKATKEEIRNEANNGLKNTKGTLAMARTSAPHSATAQFFINVADNDFLNFRDESLQGWGYCVFAEVVEGMDVVEKIKAVSTGRSGMHQDVPKDDVVIQKVTVSE-MLLSSTSKDW---------LGN-------VRGDVLAGIVVALALIPEAIAFSAIAGVDPQVGLYSAFCIP					MRLCDRDIEAWLDSGKLAITPRPPVERINGATVDVRLGNQFRTFSGHTAAFIDLSGPKHEVSAALDRVMSDEIVLPEGEAFFLHPGELALAVTLESVTIPDDLVGWLDGRSSLARLGLMVHVTAHRIDPGWQGRIVLEFYNSGKLPLALRPGMLIGALSFEPLSGPAARPYNRRENAKYRGQQGADASRIDKD-----------------MAQPHLLAERISRLSNALEKGLYERHHAIRLCLLAALSGESVFLLGPPGIAKSLIARRLKCAFQHARAFEYLMTRFSTPEEVFGPLSIQALKDEGRYQRLTKGYLPDAEIVFLDEIWKAGPAILNTLLTAINERRFRNGDSEEKIPMRLLVTASNELPEADSGLEALYDRMLIRLWLDNVHEKQNFRSM…					MSNQRIRIRLKAFDHRLIDQSTAEIVETAKRTGAQVRGPIPLPTRKERFTVLISPHVNKDARDQYEIRTHKRLVDIVEPTEKTVDALMRLDLAAGVDVQISLGMPVALLALALSAFAIGTTEFVIMGLLPEVANDLRVSIPSAGWLISGYALGVAIGAPIMALLTAKLPRKKTLILLMVIFIIGNLLCALAYSYNLLMLARVITALCHGAFFGIGSVVAASLVSADRQASAVALMFTGLTLANVLGVPLGTWFGQLFGWRATFWGVSAIGVLAFIALITSLPGNKNEKPVDLASEISALANGKLWLSLLMTVCFAAAMFALFSYIAPLLLQVTGISDRGVSWTLFLIGAGLTVGNILGGKMADRKVSLSLIGSFSLITLFSLLFSWTSHALWLAEITLF…					MRKRFIAGAVCPHCQEKDTLAMWRENNVDVVECVKCGHQMREADKQARDQVRSNEQVIGIFHPEMTEQKDTSAVVDETTPAVDRPSSTQEKSPRNRNNGGMVLGAVAIVIALAIGAGLYLNDKHQAELQAQTNQELSDQLSTLQKQANSDKQQLAQQLSATEKALETAQSQQAASAKELETLREKMASISGNDVRSWLVAQADYLVKLAGRKLWSDQDVTTAAALLKSADASLADMNDPSVMNVRRALTQDISTLSAISQVDYDGIILKLNQLSNGVDNLRLADNDSDDAPMDSDSGELSSSIREWRQNLVKSWHNFMDDFITIRRRDNTAQPLLAPNQDVYLRENIRSRLLIAAQAVPRHQEEIYKQSLETVSTWVRAWYDTNDASTKAFLAQLDELS…					MQLNKVLKGLMLALPIMAVAACSSHKNNNNDQS-GAGA-DGAY--GANSGMNG--NGNMSSDEQARLQMQQLQQNNIVYFGLDKYDVQSDYAQMLDQHANFLRSNPSYKVTIEGHADERGTPEYNIALGERRANAVKMYLQGKGVSADQMSIVSYGKEKPAVLGHDEAAYAKNRRAVLVYMPVALLALALSAFAIGTTEFVIMGLLPEVANDLRVSIPSAGWLISGYALGVAIGAPIMALLTAKLPRKKTLILLMVIFIIGNLLCALAYSYNLLMLARVITALCHGAFFGIGSVVAASLVSADRQASAVALMFTGLTLANVLGVPLGTWFGQLFGWRATFWGVSAIGVLAFIALITSLPGNKNEKPVDLASEISALANGKLWLSLLMTVCFAAAMFALF…					-MKFKRQ---IKPYRAAAGGWGSLEATTRFVFDSKAALKNLRNLMRMNKARGFDCPGCAWGD-DNKSTFSFCENGAKAVTWEATRRVVDTDFFAKHSVATLYAQSDYFLEYQGRLTHPLRYNAESDHYEPISWDDALALIAQHIKAMDNPDQMELYTSGRASNEASWLYQLFGRMLGTNNFPDCSNMCHEASGAGLKRSIGVGKGTIRLDDFDHADAIFVFGQNPGTNHPRMLHSLRHAADHGAKIVTFNTLRER					MGIFSRFADIVNANINSLLERAEDPQKLVRLMIQEMEDTLVEVRSTSARALAEKKQLARRIEQAELQQAEWQDKAELALRKDKEDLARSALIEKQKLTDLIATLKQEVDQVEETLARMKGEITELEKKLSETRARQQALTLRHQAASSSRDVRRQLDGGKIDEAMARFESFERRIDHMEAEAESHGFGKPKTLDQQFTDLKADDEISQQLNALKAKMNRSE--MTDNNTALKKAGLKVTLPRLKILEVLQ--EPACHHVSAEDLYKRLIDMGEEIGLATVYRVLNQFDDAGIVTRHNFEGGKSVFELTQQHHHDHLICLDCGKVIEFSDESIETRQREIATRHGIKLTNHSLYLYGHCALGDCREDETLHDK-MTDKLTSLRQLTTVVADTGDIAAMKL…					--------------------------MQQNQETSKKEQYNLNKLQKRLRRNVGEAIADFNMIEEGDRIMVCLSGGKDSYTMLEILRSLQKSAPVSFSLVAVNLDQKQPGFPGHILPEYLDAQGVEYKIVEEDTYSIVKDKIPEGKTTCSLCSRLRRGILYRTATELGCTKIALGHHRDDILQTLFLNMFYGGKMKGMPPKLMSDDGKHIVIRPLAYCREKDIIRFSEARQFPIIPCNLCGSQPNLQRQVVADMLR					--MRFVDTHCHFDFPPFVGQAAESLARAAQSGVEKIIVPSVDAGRFATVCQLAHAHPALYAALGLHPIVIEHHQES-HLSELEARLIKSPAKLVALGEIGLDLYRDD--PQFDKQKHFLDAQLKLAKRYDLPVILHSRRTHDQLALHLRRHDLSRRGVVHGFAGSLQQAQAFIKLGYAIGVGGTITYPRASKTRQTIAQLPLSSLLLETDAPDMPLNGFQGQPNRPERAFQVWQVLCELREEAPEVIADALWHNS					MQLNKVLKGLMLALPIMAVAACSSHKNNNNDQS-GAGA-DGAY--GANSGMNG--NGNMSSDEQARLQMQQLQQNNIVYFGLDKYDVQSDYAQMLDQHANFLRSNPSYKVTIEGHADERGTPEYNIALGERRANAVKMYLQGKGVSADQMSIVSYGKEKPAVLGHDEAAYAKNRRAVLVYMDQKRLTHLRQLEAESIHIIREVAAEFGNPVMMYSIGKDSSVMLHLARKAFYPGTLPFPLLHVDTGWKFREMYEFRDRTVKAMGAELLVHRNPEGVAMGINPFVHGSAKHTDIMKTEGLKQALNKYGFDAAFGGARRDEEKSRAKERIYSFRDRFHRWDPKNQRPELWHNYNGQINKGESIRVFPLSNWTELDIWQYIFLENIEIVPLYLAAPRPVLER…
>P_anthophila					>P_anthophila					>P_anthophila					>P_anthophila					>P_anthophila					>P_anthophila					>P_anthophila					>P_anthophila					>P_anthophila					>P_anthophila
--------------------MVTFQTNHGDIVIKTFDDKAPATVQNFLDYCREGFYDNTIFHRVINGFMIQGGGFEPGMKQKATKDEIKNEANNGLKNTKGTLAMARTSAPHSATAQFFINVADNDFLNFRDESVQGWGYCVFAEVVEGMDVVEKIKAVSTGRSGMHQDVPKDDVVIQKVTVSE-MLLSSTRKDW---------LGN-------VRGDVLAGIVVALALIPEAIAFSIIAGVDPQVGLYSAFCIP					MRLCDRDIEAWLDSGKLAIEPRPPVERINGATVDVRLGNQFRTFSGHTAAFIDLSGPKQEVSAALDRVMSDEIVLADGEAFFLHPGELALAVTLESVTLPDDLVGWLDGRSSLARLGLMVHVTAHRIDPGWQGRIVLEFYNSGKLPLALRPGMLIGALSFEPLSGPAARPYNRREDAKYRGQQGADASRIDKD-----------------MAQPHLLAERISRLSNALEKGLYERHHAIRLCLLAALSGESVFLLGPPGIAKSLIARRLKYAFQHARAFEYLMTRFSTPEEVFGPLSIQALKDEGRYQRLTKGYLPDAEIVFLDEIWKAGPAILNTLLTAINERRFRNGDSEETIPMRLLVTASNELPEADSGLEALYDRMLIRLWLDNVHEKQNFRSM…					MQNQRIRIRLKAFDHRLIDQSTAEIVETAKRTGAQVRGPIPLPTRKERFTVLISPHVNKDARDQYEIRTHKRLVDIVEPTEKTVDALMRLDLAAGVDVQISLGMPVALLALALSAFAIGTTEFVIMGLLPDVARDLQVSIPSAGWLISGYALGVAIGAPIMALITARLPRKKTLILLMVIFIVGNLLCALAYNYNLLMLARIVTALCHGAFFGIGAVVAASLVPAGRQASAVALMFTGLTLANVLGVPLGTSFGQMFGWRATFWGVAVIGVLAFIALIVSLPTNKQEKPVHLASEIGALANGKLWLSLLMTVCFAAAMFALFSYIAPLLLEITGISDRGVSWTLFLIGAGLTVGNILGGKLADWKVSFSLILSFSLIAIFSLLFSWTSHALWLAEITLF…					MRKRFIAGATCPHCQEKDTLAMWRENSVDVVECVKCGHQMREADKQARDQVRTNEQVIGIFHPEMTEQKDSSAMVEETTPAVDRSLSSNDTPPRNANKGGMALGAVAIVIALAMGAGLYLYGKHQADLQAQTNQKLSDQLSALQQQASSDKQQLTQQLSGAETALQTAQAQQNASAKELETLREKMAVISGNDVRSWLLAQADYLVKLAGRKLWSDQDVTTAAALLKSADASLADMNDPSVMNVRRALTQDISNLSSVTQVDYDGVILKLNQLSNNVDNLRLADNDSDDAPMDSDGGELSGSVREWRQNLVKSWHNFMDDFITIRRRDNTAQPLLAPNQDVYLRENIRSRLLIAAQAVPRHQDEIYKQSIDTVSAWVRAWYDTNDAATKAFLAQLDELS…					MQLNKMLKGLMLALPVLAVAACSSHKNNNNDQT-GMGA-DGAY--GANSGMNGN-GGNMSSDEQARLQMQQLQQNNIVYFGLDKYDVQSDYAQMLDQHASFLRSNPSYKVTIEGHADERGTPEYNIALGERRANAVKMYLQGKGVSADQMSIVSYGKEKPAVLGHDEAAYAKNRRAVLVYMPVALLALALSAFAIGTTEFVIMGLLPDVARDLQVSIPSAGWLISGYALGVAIGAPIMALITARLPRKKTLILLMVIFIVGNLLCALAYNYNLLMLARIVTALCHGAFFGIGAVVAASLVPAGRQASAVALMFTGLTLANVLGVPLGTSFGQMFGWRATFWGVAVIGVLAFIALIVSLPTNKQEKPVHLASEIGALANGKLWLSLLMTVCFAAAMFALF…					-MKFKRQ---IKPYRAAAGGWGSLEATTRFVLDSKAALKNMRNLMRMNKARGFDCPGCAWGD-DNKSTFSFCENGAKAVTWEATRRVVDTDFFARHSVTTLYTQSDYFLEYQGRLTHPLRYNAETDHYEPISWDDAFALIAQHIKAMDNPDQMELYTSGRASNEASWLYQLFGRLVGTNNFPDCSNMCHEASGTGLKRSIGVGKGTIRLDDFDHADAIFVFGQNPGTNHPRMLHSLRHAADHGAKIVTFNTLRER					MGIFSRFADIVNANINSLLERAEDPQKLVRLMIQEMEDTLVEVRSTSARALAEKKQLSRRIEQAEIQQAEWQEKAELALRKDKDDLARAALIEKQKLTDLIASLKQEVTHVEETLERMKGEIGELEKKLSETRARQQALTLRHQAASSSRDVRRQLDSGKIDEAMARFESFERRIDHMEAEAESHGFGKTKTLDQQFTDLKADDEISQQLNALKAKMNRSE--MTDNNTALKKAGLKVTLPRLKILEVLQ--EPECHHVSAEDLYKRLIDIGEEIGLATVYRVLNQFDDAGIVTRHNFEGGKSVFELTQQHHHDHLICLDCGKVIEFSDESIETRQREIATRHGIKLTNHSLYLYGHCTLGDCREDETLHDQ-MTDKLTSLRQLTTVVADTGDIAAMKL…					--------------------------MQDNQTVDKKEQYNLNKLQKRLRRHVGEAIADFNMIEEGDRIMVCLSGGKDSYTMLEILRSLQKSAPVSFSLIAVNLDQKQPGFPEHILPAYLESQGVEYRIIEEDTYSIVKEKIPEGKTTCSLCSRLRRGILYRVATELGCTKIALGHHRDDILQTLFLNMFYGGKMKGMPPKLMSDDGKQIVIRPLAYCREKDIIRFSEARQFPIIPCNLCGSQPNLQRQVVADMLR					--MKFIDTHCHFDFPPFEGDIPASLARAAEAGVEKIIVPAIDASRFERVSALAAAHPALYAALGLHPIVIEAHQTS-HLDQLETLLQQRPRKLVAIGEIGLDLYRDD--PQFDKQQRFLEAQLKLAKTYQLPVILHSRRTHDKLAQILRRHDLPRRGVVHGFAGSLQQAQAFIRLGYAIGVGGTITYERASKTRQTVAQLPLSSLLLETDAPDMPLQGFQGQPNRPERARRVWEVLCSLRDESPEEIADALWHNS					MQLNKMLKGLMLALPVLAVAACSSHKNNNNDQT-GMGA-DGAY--GANSGMNGN-GGNMSSDEQARLQMQQLQQNNIVYFGLDKYDVQSDYAQMLDQHASFLRSNPSYKVTIEGHADERGTPEYNIALGERRANAVKMYLQGKGVSADQMSIVSYGKEKPAVLGHDEAAYAKNRRAVLVYMDQKRLTHLRQLEAESIHIIREVAAEFSNPVMMYSIGKDSSVMLHLARKAFYPGTLPFPLLHVDTGWKFREMYEFRDRTVKAMGAELIVHRNPEGVAMGINPFVHGSAKHTDIMKTEGLKQALDKYGFDAAFGGARRDEEKSRAKERIYSFRDRFHRWDPKNQRPELWHNYNGQINKGESIRVFPLSNWTELDIWQYIFLENIEIVPLYLAAPRPVLER…
>P_conspicua					>P_conspicua					>P_conspicua					>P_conspicua					>P_conspicua					>P_conspicua					>P_conspicua					>P_conspicua					>P_conspicua					>P_conspicua
--------------------MVTFQTNHGDIVIKTFDDKAPATVKNFLDYCREGFYDNTIFHRVINGFMIQGGGFEPGMKQKATKDEIQNEASNGLKNTKGTLAMARTSAPHSATAQFFINVADNDFLNFRDESVQGWGYCVFAEVVEGMDVVEKIKGVSTGRSGMHQDVPKDDVIIQKVTVSE-MTQTNDVAAT-SVVASDISVGRVLRSPALLTRECLAGVITALALIPEVISFSVIAGVDPKVSLVASVVLC					MRLCDRDIEAWLDNGKLAIEPRPPVERINGATVDVRLGNQFRTFSGHTAAYIDLSGPKHEVSAALDRVMSDEIVLPDGEAFFLHPGELALAVTLESVTLPDDLVGWLDGRSSLARLGLMVHVTAHRIDPGWQGRIVLEFYNSGKLPLALRPGMLIGALSFEPLSGPAARPYNRREDAKYRGQQGADASRIDKD---------------VIMAQPHLLAERISRLSNALEKGLYERHHAIRLCLLAALSGESVFLLGPPGIAKSLIARRLKYAFQHARAFEYLMTRFSTPEEVFGPLSIQALKDEGRYQRLTKGYLPDAEIVFLDEIWKAGPAILNTLLTAINERRFRNGDSEEKIPMRLLVTASNELPEADSGLEALYDRMLIRLWLDNVHEKQNFRSM…					MQNQRIRIRLKAFDHRLIDQSTAEIVETAKRTGAQVRGPIPLPTRKERFTVLISPHVNKDARDQYEIRTHKRLVDIVEPTEK---PLML--------------MPVALLALALSAFAIGTTEFVIMGLLPDVAGDLQVSIPSAGWLISGYALGVAIGAPIMALLTARLPRKKTLTLLMVIFIVGNLLCALAYNYNLLMLARIVTALCHGAFFGIGAVVAASLVAPGRQASAVALMFTGLTLANVLGVPLGTWFGQLFGWRATFWGVAIIGVLAFIALIVSLPNNKQEKPVDLASEVSALANGKLWLSLLMTVFFAAAMFALFSYIAPLLLEVTGISDRGVSWTLFLIGAGLTVGNILGGKMADWKVSFSLILSFSLIAIFSLLFSWTSHALWLAEITLF…					MRKRFIAGATCPHCQEKDTLAMWRENNVDVVECVKCGHQMREADKQARDQVRTNEQVIGIFHPEMTEQKDSSAMVEETTPAVDRSATLNTPPPRKTKNGGMVLGAVAIVIALAIGAGLYLNGKHQADLQAQTNQRLSEQLSALQQQASSDKQQLTQQLSSTETALQKAEAQQGASAKELETLREKVAVISGNDVRSWLLAQADYLVKLAGRKLWSDQDVTTAAALLKSADASLADMNDPSVMNVRRALTQDISTLSSVTQVDYDGVILKLNQLSNNVDNLRLADNDSDDAPMDSDGGELSGSVREWRQNLVKSWHNFMDDFITIRRRDNTAQPLLAPNQDVYLRENIRSRLLIAAQAVPRHQDEIYKQSIDTVSAWVRAWYDTNDAATKAFLAQLDELS…					MQLNKVLKGLMLALPVLAVAACSSHKNNNNDQT-GMGA-DGAY--GANSGMNGN-GGNMSSDEQARLQMQQLQQNNIVYFGLDKYDVQSDYAQMLDQHAAFLRSNPSYKVTIEGHADERGTPEYNIALGERRASAVKMYLQGKGVSADQMSIVSYGKEKPAVLGHDEAAYSKNRRAVLVYMPVALLALALSAFAIGTTEFVIMGLLPDVAGDLQVSIPSAGWLISGYALGVAIGAPIMALLTARLPRKKTLTLLMVIFIVGNLLCALAYNYNLLMLARIVTALCHGAFFGIGAVVAASLVAPGRQASAVALMFTGLTLANVLGVPLGTWFGQLFGWRATFWGVAIIGVLAFIALIVSLPNNKQEKPVDLASEVSALANGKLWLSLLMTVFFAAAMFALF…					-MKFKRQ---IKPYRAAAGGWGSLEATTRFVLDSKAALKNMRNLMRMNKARGFDCPGCAWGD-DNKSTFSFCENGAKAVTWEATRRIVDSEFFARHSVTTLYTQSDYFLEYQGRLTHPLRYNAETDHYEPISWDDAFALIARHIKAMDNPDQMELYTSGRASNEASWLYQLFGRLMGTNNFPDCSNMCHEASGTGLKRSIGVGKGTIRLDDFDHADAIFVFGQNPGTNHPRMLHSLRHAADHGAKIVTFNTLRER					MGIFSRFADIVNANINSLLERAEDPQKLVRLMIQEMEDTLVEVRSTSARSLAEKKQLSRRIEQAEIQQAEWQEKAELALRKDKDDLARSALIEKQKLTDLIATLKQEVDQVEETLARMKGEISELEKKLSETRARQQALTLRHQAASSSRDVRRQLDSGKIDEAMARFESFERRIDHMEAEAESHGFGKPKTLDQQFTDLKADDEISQQLNALKAKMNRSE--MTDNNTALKKAGLKVTLPRLKILEVLQ--EPQCHHVSAEDLYKRLIDIGEEIGLATVYRVLNQFDDAGIVTRHNFEGGKSVFELTQQHHHDHLICLDCGKVIEFSDESIETRQREIATRHGIKLTNHSLYLYGHCALGDCREDETLHDQ-MTDKLTSLRQLTTVVADTGDIAAMKL…					--------------------------MLDNQSVDKKEQYNLNKLQKRLRRHVGEAIADFNMIEEGDRIMVCLSGGKDSYTMLEILRSLQKSAPVNFSLIAVNLDQKQPGFPQHILPGYLESQGVEYRIIEEDTYSIVKDKIPEGKTTCSLCSRLRRGILYRTASELGCTKIALGHHRDDILQTLFLNMFYGGKMKGMPPKLMSDDGKHIVIRPLAYCREKDIIRFSEARQFPIIPCNLCGSQPNLQRQVVADMLR					--MRFIDTHCHFDFPPFESDADASLARAAAAGIEKIIIPAVEASRFNRVCELAATHAPLYAALGLHPIAIEQHQEA-HLDQLEMMLQQRPRKLVAIGEIGLDLYRDD--PQFDKQLRFLDAQLKLAKRYALPVILHSRRTHDKLAQHLRRHDLPRRGVVHGFAGSLQQAQAFIKLGYAIGVGGTITYERASKTRQTLAQLPLSSLLLETDAPDMPLKGFQGQPNRPERARQVWETLCTLREESPEEIADALWHNS					MQLNKVLKGLMLALPVLAVAACSSHKNNNNDQT-GMGA-DGAY--GANSGMNGN-GGNMSSDEQARLQMQQLQQNNIVYFGLDKYDVQSDYAQMLDQHAAFLRSNPSYKVTIEGHADERGTPEYNIALGERRASAVKMYLQGKGVSADQMSIVSYGKEKPAVLGHDEAAYSKNRRAVLVYMDQKRLTHLRQLEAESIHIIREVAAEFSNPVMMYSIGKDSSVMLHLARKAFFPGTLPFPLLHVDTGWKFREMYEFRDRTVKAMGAELLVHRNPEGVAMGINPFVHGSAKHTDIMKTEGLKQALNKYGFDAAFGGARRDEEKSRAKERIYSFRDRFHRWDPKNQRPELWHNYNGQINKGESIRVFPLSNWTELDIWQYIFLENIEIVPLYLAAPRPVLER…
>P_sp_aB					>P_sp_aB					>P_sp_aB					>P_sp_aB					>P_sp_aB					>P_sp_aB					>P_sp_aB					>P_sp_aB					>P_sp_aB					>P_sp_aB
--------------------MVTFQTNHGDIVIKTFDDKAPATVQNFLDYCREGFYDNTIFHRVINGFMIQGGGFEPGMKQKETKAEIQNEANNGLKNTKGTLAMARTSAPHSATAQFFINVADNDFLNFRDESVQGWGYCVFAEVVEGMDVVEKIKAVSTGRSGMHQDVPKDDVVIQKVTVSE-MLLSSTRKDW---------LGN-------VRGDVLAGIVVALALIPEAIAFSIIAGVDPQVGLYSAFCIP					MRLCDRDIEAWLDNGKLAIEPRPPVERINGATVDVRLGNQFRTFSGHTAAFIDLSGPKQEVSAALDRVMSDEIVLPDGEAFFLHPGELALAVTLESVTLPDDLVGWLDGRSSLARLGLMVHVTAHRIDPGWQGRIVLEFYNSGKLPLALRPGMLIGALSFEPLSGPAARPYNRREDAKYRGQQGADASRIDKD-----------------MAQPHLLAERISRLSNALEKGLYERHHAIRLCLLAALSGESVFLLGPPGIAKSLIARRLKYAFQHARAFEYLMTRFSTPEEVFGPLSIQALKDEGRYQRLTKGYLPDAEIVFLDEIWKAGPAILNTLLTAINERRFRNGDSEETIPMRLLVTASNELPEADSGLEALYDRMLIRLWLDNVHEKQNFRSM…					MQNQRIRIRLKAFDHRLIDQSTAEIVETAKRTGAQVRGPIPLPTRKERFTVLISPHVNKDARDQYEIRTHKRLVDIVEPTEKTVDALMRLDLAAGVDVQISLGMPVALMALALSAFAIGTTEFVIMGLLPEVARDLQVSIPSAGWLISGYALGVAIGAPIMALLTARLPRKKTLILLMVIFIVGNLLCALAYNYNLLMLARIVTALCHGAFFGIGAVVAASLVPAGRQASAVALMFTGLTLANVLGVPLGTSFGQMFGWRATFWGVAVIGVLAFIALIVSLPNNKQEKPVHLASEIGALANGKLWLSLLMTVCFAAAMFALFSYIAPLLLEVTGISDRGVSWTLFLIGAGLTVGNILGGKLADWKVSFSLILSFSLIAIFSLLFSWTSHALWLAEITLF…					MRKRFIAGATCPHCQEKDTLAMWRENNVDVVECVKCGHQMREADKQARDQVRSNEQVIGIFHPEMTEQKDSSAMVEETTPAVDRSSSSNSIPPRNAKKGGMVLGAVAIVIALAMGAGLYLNGKHQADLQAQTNQKLSDQLSALQQQAGSDKQQLTQQLSSAEKALQTAQQQQNASAKELETLREKVAVISGNDVRSWLLAQADYLVKLAGRKLWSDQDVTTAAALLKSADASLADMNDPSVMNVRRALTQDISNLSSVTQVDYDGVILKLNQLSNNVDNLRLADNDSDDAPMDSDGGELSGSVREWRQNLVKSWHNFMDDFITIRRRDNTAQPLLAPNQDVYLRENIRSRLLIAAQAVPRHQDEIYKQSIDTVSAWVRAWYDTNDAATKAFLAQLDELS…					MQLNKVLKGLMLALPVLAVAACSSHKNNNNDQT-GMGA-DGAY--GANSGMNGN-GGNMSSDEQARLQMQQLQQNNIVYFGLDKYDVQSDYAQMLDQHATFLRSNPSYKVTIEGHADERGTPEYNIALGERRANAVKMYLQGKGVSADQMSIVSYGKEKPAVLGHDEAAYSKNRRAVLVYMPVALMALALSAFAIGTTEFVIMGLLPEVARDLQVSIPSAGWLISGYALGVAIGAPIMALLTARLPRKKTLILLMVIFIVGNLLCALAYNYNLLMLARIVTALCHGAFFGIGAVVAASLVPAGRQASAVALMFTGLTLANVLGVPLGTSFGQMFGWRATFWGVAVIGVLAFIALIVSLPNNKQEKPVHLASEIGALANGKLWLSLLMTVCFAAAMFALF…					-MKFKRQ---IKPYRAAAGGWGSLEATTRFVLDSKAALKNMRNLMRMNKARGFDCPGCAWGD-DNKSTFSFCENGAKAVTWEATRRMVDTDFFAKHSVTTLYTQSDYFLEYQGRLTHPLRYNAETDHYEPISWEDAFALIAQHIKAMDHPNQMELYTSGRASNEASWLYQLFGRLMGTNNFPDCSNMCHEASGTGLKRSIGVGKGTIRLDDFDHADAIFVFGQNPGTNHPRMLHSLRHAADHGAKIVTFNTLRER					MGIFSRFADIVNANINSLLERAEDPQKLVRLMIQEMEDTLVEVRSTSARALAEKKQLSRRIEQAEIQQAEWQEKAELALRKDKDDLARSALIEKQKLTDLIASLKQEVGQVEETLERMKGEISELEKKLTETRARQQALTLRHQAASSSRDVRRQLDSGKIDEAMARFESFERRIDHMEAEAESHGFGKPKTLDQQFTDLKADDEISQQLNALKAKMNRSE--MTDNNTALKKAGLKVTLPRLKILEVLQ--EPECHHVSAEDLYKRLIDIGEEIGLATVYRVLNQFDDAGIVTRHNFEGGKSVFELTQQHHHDHLICLDCGKVIEFSDESIETRQREIATRHGIKLTNHSLYLYGHCTLGDCRENETLHDQ-MTDKLTSLRQLTTVVADTGDIAAMKL…					--------------------------MQDNQTVDKKEQYNLNKLQKRLRRNVGEAIADFNMIEEGDRIMVCLSGGKDSYTMLEILRSLQKSAPVNFSLIAVNLDQKQPGFPEHILPQYLEAQGVEYRIIEEDTYSIVKEKVPEGKTTCSLCSRLRRGILYRVATELGCTKIALGHHRDDILQTLFLNMFYGGKLKGMPPKLMSDDGKQIVIRPLAYCREKDIIRFSDARQFPIIPCNLCGSQPNLQRQVVADMLR					--MRFIDTHCHFDFPPFEGDIAASLARAAEAGVEKIIIPAIDASRFERVCALAAAHPPLYAALGLHPIVIEHHQNA-HLDQLETLLQQRPRKLVAIGEIGLDLYRDD--PHFDKQQRFLESQLKLAKRYALPVILHSRRTHDKLAQILRRHDLPRRGVVHGFAGSLQQAQAFIKLGYAIGVGGTITYERASKTRQTVAQLPLSSLLLETDAPDMPLQGFQGQPNRPERARQVWQVLCSLRNESPEEIADALWHNS					MQLNKVLKGLMLALPVLAVAACSSHKNNNNDQT-GMGA-DGAY--GANSGMNGN-GGNMSSDEQARLQMQQLQQNNIVYFGLDKYDVQSDYAQMLDQHATFLRSNPSYKVTIEGHADERGTPEYNIALGERRANAVKMYLQGKGVSADQMSIVSYGKEKPAVLGHDEAAYSKNRRAVLVYMDQKRLTHLRQLEAESIHIIREVAAEFSNPVMMYSIGKDSSVMLHLARKAFYPGTLPFPLLHVDTGWKFREMYEFRDRTVKAMGAELLVHRNPEGVAMGINPFVHGSAKHTDIMKTEGLKQALNKYGFDAAFGGARRDEEKSRAKERIYSFRDRFHRWDPKNQRPELWHNYNGQINKGESIRVFPLSNWTELDIWQYIFLENIEIVPLYLAAPRPVLER…
>P_deleyi					>P_deleyi					>P_deleyi					>P_deleyi					>P_deleyi					>P_deleyi					>P_deleyi					>P_deleyi					>P_deleyi					>P_deleyi
--------------------MVTFQTNHGDIVIKTFDDKAPATVQNFLDYCREGFYDNTIFHRVINGFMIQGGGFEPGMKQKETKAEIKNEANNGLKNTKGTLAMARTSAPHSATAQFFINVADNDFLNFRDESVQGWGYCVFAEVVEGMDVVEKIKAVSTGRSGMHQDVPKDDVVIQKVTVSE-MLLSSTRKDW---------LGN-------VRGDVLAGIVVALALIPEAIAFSIIAGVDPQVGLYSAFCIP					-------------------------------------------------------------------------------------------VTLESVTLPDDLVGWLDGRSSLARLGLMVHVTAHRIDPGWQGRIVLEFYNSGKLPLALRPGMLIGALSFEPLSGPAARPYNRREDAKYRGQQGADASRIDKD---------------VIMAQPHLLAERISRLSNALEKGLYERHHAIRLCLLAALSGESVFLL					MQNQRIRIRLKAFDHRLIDQSTAEIVETAKRTGAQVRGPIPLPTRKERFTVLISPHVNKDARDQYEIRTHKRLVDIVEPTEK---PLML--------------MPVALLALALSAFAIGTTEFVIMGLLPEVARDLQVSIPSAGWLISGYALGVAIGAPIMALLTARLPRKKTLILLMVIFIIGNLLCALAYNYHLLMLARIVTALCHGAFFGIGAVVAASLVPADRQASAVALMFTGLTLANVLGVPLGTSFGQMFGWRATFWGVAVIGVLAFIALIVSLPQNRQEKPVHLASEIGALANGKLWLSLLMTVFFAAAMFALFSYIAPLLSEVTGISGRGVSWTLFLIGAGLTVGNILGGRLADWKVSFSLILSFSLIALFSLLFSWTSHALWLAEITLF…					MRKRFIAGATCPHCQEKDTLAMWRENNVDVVECVKCGHQMREADKQARDQVRTNEQVIGIFHPE---------------------------------------------------------------------------------------------------------------------------------------------VKLAGRKLWSDQDVTTAAALLKSADASLADMNDPSVMNVRRALTQDISNLSAVTQVDYDGVILKLNQLSNNVDNLRLADNDSDDAPMDSDGGELSGSVREWRQNLVKSWHNFMDDFITIRRRDNTAQPLLAPNQDVYLRENIRSRLLIAAQAVPRHQDEIYKQSIDTVSAWVRAWYDTNDAATKAFLAQLDELS…					MQLNKVLKGLMLALPVLAVAACSSHKNNNNDQT-GMGA-DGAY--GANSGMNGN-GGNMSSDEQARLQMQQLQQNNIVYFGLDKYDVQSDYAQMLDQHASFLRSNPSYKVTIEGHADERGTPEYNIALGERRANAVKMYLQGKGVSADQMSIVSYGKEKPAVLGHDEAAYSKNRRAVLVYMPVALLALALSAFAIGTTEFVIMGLLPEVARDLQVSIPSAGWLISGYALGVAIGAPIMALLTARLPRKKTLILLMVIFIIGNLLCALAYNYHLLMLARIVTALCHGAFFGIGAVVAASLVPADRQASAVALMFTGLTLANVLGVPLGTSFGQMFGWRATFWGVAVIGVLAFIALIVSLPQNRQEKPVHLASEIGALANGKLWLSLLMTVFFAAAMFALF…					-MKFKRQ---IKPYRAAAGGWGSLEATTRFVLDSKAALKNMRNLMRMNKARGFDCPGCAWGD-DNKSTFSFCENGAKAVTWEATRRVVDTDFFAKHSVTTLYTQSDYFLEYQGRLTHPLRYNAETDHYEPISWDAAFALIAQHISAMDHPNQMELYTSGRASNEASWLYQLFGRLMGTNNFPDCSNMCHEASGTGLKRSIGVGKGTIRLDDFDHADAIFVFGQNPGTNHPRMLHSLRHAADHGAKIVTFNTLRER					MGIFSRFADIVNANINSLLERAEDPQKLVRLMIQEMEDTLVEVRSTSARALAEKKQLSRRIEQAEIQQAEWQEKAELALRKDKEDLARSALIEKQKLTDLIASLKQEVSQVEETLERMKGEIGELEKKLSETRARQQALTLRHQAASSSRDVRRQLDSGKIDEAMARFESFERRIDHMEAEAESHGFGKPKTLDQQFTDLKADDEISQQLNALKARMNRSE--MTDNNTALKKAGLKVTLPRLKILEVLQ--EPECHHVSAEDLYKRLIDIGEEIGLATVYRVLNQFDDAGIVTRHNFEGGKSVFELTQQHHHDHLICLDCGKVIEFSDESIETRQREIATRHGIKLTNHSLYLYGHCTVGDCRENENLHDQ-MTDKLTSLRQLTTVVADTGDIAAMKL…					--------------------------MQDNQTVDKKEQYNLNKLQKRLRRHVGEAIADFNMIEEGDRIMVCLSGGKDSYTMLEILRSLQKSAPVNFSLIAVNLDQKQPGFPEHILPQYLEAQGVEYRIIEEDTYSIVKEKIPEGKTTCSLCSRLRRGILYRVATELGCTKIALGHHRDDILQTLFLNMFYGGKMKGMPPKLMSDDGKQIVIRPLAYCREKDIIRFSEARQFPIIPCNLCGSQPNLQRQVVADMLR					--MRFIDTHCHFDFPPFEGDADGSLARAAEAGVEKIIIPAIDASRFGRVCELAATHPALYAALGLHPIVIEHHRDD-HLDQLETLLQQRPRKLVAIGEIGLDLYRDD--PQFDKQQRFLEAQLRLAKHYALPVILHSRRTHDKLAQILRRHDLPRRGVVHGFAGSLQQAQAFIKLGYAIGIGGTITYERASKTRQTVAQLPLASLLLETDAPDMPLHGFQGQPNRPERARQVWQTLCSLREESPEAIADALWQNS					MQLNKVLKGLMLALPVLAVAACSSHKNNNNDQT-GMGA-DGAY--GANSGMNGN-GGNMSSDEQARLQMQQLQQNNIVYFGLDKYDVQSDYAQMLDQHASFLRSNPSYKVTIEGHADERGTPEYNIALGERRANAVKMYLQGKGVSADQMSIVSYGKEKPAVLGHDEAAYSKNRRAVLVYMDQKRLTHLRQLEAESIHIIREVAAEFSNPVMMYSIGKDSSVMLHLARKAFYPGTLPFPLLHVDTGWKFREMYEFRDRTVKAMGAELLVHRNPEGVAMGINPFVHGSAKHTDIMKTEGLKQALNKYGFDAAFGGARRDEEKSRAKERIYSFRDRFHRWDPKNQRPELWHNYNGQINKGESIRVFPLSNWTELDIWQYIFLENIEIVPLYLAAPRPVLER…
>P_eucrina					>P_eucrina					>P_eucrina					>P_eucrina					>P_eucrina					>P_eucrina					>P_eucrina					>P_eucrina					>P_eucrina					>P_eucrina
--------------------MVTFQTNHGDIVIKTFDDKAPATVQNFLDYCREGFYDNTIFHRVINGFMVQGGGFEPGMKQKATKAEIRNEANNGLKNTKGTLAMARTQAPHSATAQFFINVADNDFLNFRDESLQGWGYCVFAEVVEGMDVVEKIKAVKTGRSGMHQDVPTEDVVIQKVTVSE-MLLSSTRKDW---------LGN-------VRGDVLAGIVVALALIPEAIAFSIIAGVDPQVGLYSAFCIP					MRLCDRDIEAWLDSGKLAIEPRPPVERINGATVDVRLGNGFRTFSGHTAAFIDLSGPKQAVSAALDRVMSDEIVLPDGEAFFLHPGELALAVTLESVTIPDDLVGWLDGRSSLARLGLMVHVTAHRIDPGWQGRIVLEFYNSGKLPLALRPGMLIGALSFEPLSGPAARPYNRREDAKYRGQQGADASRIDKD---------------VIMAQPHLLAERISRLSNALEKGLYERHHAIRLCLLAALSGESVFLLGPPGIAKSLIARRLKYAFQHARAFEYLMTRFSTPEEVFGPLSIQALKDEGRYQRLTRGYLPDAEIVFLDEIWKAGPAILNTLLTAINERRFRNGDCEEAIPMRLLVTASNELPEADSGLEALYDRMLIRLWLDNVHEKQNFRSM…					MSNQRIRIRLKAFDHRLIDQSTAEIVETAKRTGAQVRGPIPLPTRKERFTVLISPHVNKDARDQYEIRTHKRLVDIVEPTEKTVDALMRLDLAAGVDVQISLGMPVALLALALSAFAIGTTEFVIMGLLPEVAGDLQVSIPSAGWLISGYALGVAIGAPIMALLTASLPRKRTLSLLMVIFIIGNVLCALAYSYNLLMLARVVTALCHGAFFGIGSVVAASLVAPGRQASAVALMFTGLTLANVLGVPLGTWFGQLFGWRATFWGVAIIGILAFIALIVSLPANKEEKPVHLASEISALANGRLWLSLLMTVCFAAAMFALFSYIAPLLLQVTGISDRGVSWTLFLIGAGLTAGNIIGGKLADWKVSFSLILSFSLIALFSLLFSWTSHALWLAEITLF…					MRKRFIAGAVCPHCQEKDTLAMWRENSVDVVECVKCGHQMREADKQARDQIRSNEQVIGIFHPEMTEHKASSAMVEETTPA-DTSPTPENQPPREKQRDGRVLSAVAIVIALAIGAGLYLNGKHQADVQAQTNQQLSEQLSALQQQLGSDKRQLTQQLTDAGTALQEARAKQDNSAKELETLREKVATISGNDTRTWLLAQADYLVKLAGRKLWSDQDVTTAAALLKSADTSLAEMNDPSMTNVRRALTQDISSLSAVSQVDYDGIILKLNQLSNGVDNLRLADNDNDDAPMDSDGGELSGSLHEWRQNLVKSWHNFMDDFITIRRRDNTAQPLLAPNQDVYLRENIRSRLLVAAQAVPRHQEEIYKQSLDAVSSWVRAWYDTNDAATRAFLAQLDELS…					MQLNKMLKGLMLALPVIAVAACSSHKNNNNDQS-GMGA-DGAYGAGSGAGMN---GGNMSSDEQARLQMQQLQQNNIVYFGLDKYDVQSDYAQMLDQHAAFLRGNPSYKVTIEGHADERGTPEYNIALGERRANAVKMYLQGKGVSADQMSIVSYGKEKPAVLGHDESAYAKNRRAVLVYMPVALLALALSAFAIGTTEFVIMGLLPEVAGDLQVSIPSAGWLISGYALGVAIGAPIMALLTASLPRKRTLSLLMVIFIIGNVLCALAYSYNLLMLARVVTALCHGAFFGIGSVVAASLVAPGRQASAVALMFTGLTLANVLGVPLGTWFGQLFGWRATFWGVAIIGILAFIALIVSLPANKEEKPVHLASEISALANGRLWLSLLMTVCFAAAMFALF…					-MKFKRK---IQPYRAAAGGWGSLEATTRFVFDSKAALKNMRNLMRMNKARGFDCPGCAWGD-DNKSTFSFCENGAKAVTWEATRRVVEPAFFAQHSVSTLYQQSDYFLEYQGRLTHPMRYNSTTDHYEPISWDAAFALIAQHLKAMDHPDQLELYTSGRASNEASWLYQLFGRVMGTNNFPDCSNMCHEASGSGLKRSIGVGKGTIRLDDFDHANAIFVLGQNPGTNHPRMLHSLRHAADHGAKIVTFNTLRER					MGIFSRFADIVNANINSLLERAEDPQKLVRLMIQEMEDTLVEVRSTSARALAEKKQLLRRIEQAEVQQSEWQEKAELAISKEKEDLARSALIEKQKLTDLISLLQQESTQVDETLERMKGEIGELENKLGETRARQQALTLRHQAASSSRDVRRQLDSGKIDDAMARFESFERRIDHMEAEAESQRFGKSKTLDQQFAELKADDEISQQLAALKARMNRGE--MTDNNSALKKAGLKVTLPRLKILEVLQ--EPQCHHVSAEDLYKRLIDMGEEIGLATVYRVLNQFDDAGIVTRHNFEGGKSVFELTQQQHHDHLICLDCGKVIEFSDESIETRQREIATRHGIKLTNHSLYLYGHCEVGDCREDETLHNDNMTDKLTSLRQLTTVVADTGDIAAMKL…					-----MTANAGFSRLFCSPALSSVKIMSENQDVTKKEQYNFNKLQKRLRRNVGEAIADFNMIEEGDRIMVCLSGGKDSYTMLEILRSLQQSAPVNFSLVAVNLDQKQPGFPAHILPAYLETLGVEYKIVTEDTYSIVKEKIPEGKTTCSLCSRLRRGILYRTASELGCTKIALGHHRDDILQTLFLNMFYGGKMKGMPPKLMSDDGKHIVIRPLAYCREKDIIRFAEARQYPIIPCNLCGSQPNLQRQVVADMLR					--MKFIDTHCHFDFPPFVDDAVASIARAAAAGVERIIVPSTEASRFARVMQLAKDHTALYAALGLHPINIARHQDD-HLDLLAQYLAQADSNCVAIGEIGLDLYMND--PDFDKQTRLLNAQFILAKRFDLPVILHSRRTHDQLAMLLRRYNLPRCGVVHGFAGSQQQAERFIQLGYAIGVGGTITWERASKTRHTIASLPLASLLLETDAPDMPLQGFQGEPNRPERARNVFEVLCTLRPEPADVIADALWQNS					MQLNKMLKGLMLALPVIAVAACSSHKNNNNDQS-GMGA-DGAYGAGSGAGMN---GGNMSSDEQARLQMQQLQQNNIVYFGLDKYDVQSDYAQMLDQHAAFLRGNPSYKVTIEGHADERGTPEYNIALGERRANAVKMYLQGKGVSADQMSIVSYGKEKPAVLGHDESAYAKNRRAVLVYMDQNRLTHLRQLEAESIHIIREVAAEFSNPVMMYSIGKDSSVMLHLARKAFFPGTLPFPLLHVDTGWKFREMYEFRDRTVKNMGAELLVHRNPEGVAMGINPFVHGSAKHTDIMKTEGLKQALNKYGFDAAFGGARRDEEKSRAKERIYSFRDRFHRWDPKNQRPELWHNYNGQINKGESIRVFPLSNWTELDIWQYIFLENIEIVPLYLAAPRPVLER…
>E_billingiae					>E_billingiae					>E_billingiae					>E_billingiae					>E_billingiae					>E_billingiae					>E_billingiae					>E_billingiae					>E_billingiae					>E_billingiae
--------------------MVTFQTNHGDIVIKTFDDKAPATVANFLDYCREGFYDNTIFHRVINGFMVQGGGFEPGMKQKDTKEEIQNEASNGLKNTKGTLAMARTQAPHSATAQFFINVADNDFLNFRDESLQGWGYCVFAEVVEGMDVVEKIKAVATGRSGMHQDVPKEDVVIQKVTVSEMFNLSKLRASD-------------------VKNDVLAGAVVSVALIPEATAFSLLAGLSPTIGLHTAFILG					MRLCDRDIEAWLDNGQLEITPRPPVKRINGATVDVRLGNQFRTFRGHTAAFIDLSGPKDEVSAALDRVMSDEIVLPEGEAFFLHPGELALAVTLESVTLPDNLVGWLDGRSSLARLGLMVHVTAHRIDPGWQGRIVLEFYNSGKLPLALRPGMLIGALSFEPLSGPAARPYNRRTDAKYKGQQGADASRIDKD-----------------MPQPHLLAERIARLSNALEKGLYERHHAIRLCLLAALSGESVFLLGPPGIAKSLIARRLKYAFQHSRAFEYLMTRFSTPEEVFGPLSIQALKDEGRYQRLTKGYLPDAEIVFLDEIWKAGPAILNTLLTAINERRFRNGDSEEKIPMRLLVTASNELPEADSGLEALYDRMLIRLWLDNVHEKQNFRSM…					MQNQRIRIRLKAFDHRLIDQSTAEIVETAKRTGAQVRGPIPLPTRKERFTVLISPHVNKDARDQYEIRTHKRLVDIVEPTEKTVDALMRLDLAAGVDVQISLGMPVSLLALALSAFAIGTTEFVIMGLLPEVAGDLGVSIPSAGWLISGYALGVAIGAPIMALLTAKLPRKRTLMLLMVIFIIGNGLCALAYSYNLLMIARVVTALCHGAFFGIGAVVAASLVAPGKQASAVALMFTGLTLANVLGVPLGTWFGQLYGWRATFWGVSVIGVLAFIGLIVSLPTNRDEKPVHLASEIGALANGKLWLSLLMTVFFAAAMFALFSYIAPLLLQVTGISDKGVSWTLFLIGGGLTVGNILGGKLADRKLSLSLILSFSLIAVFSLIFSWTSHALWLAELTLF…					MRKRFIAGATCPKCKAQDTLALWQENNIDVVECVKCGHQMREADKQAQEQVRTNEQVIGIFHPEMTEQKNSSAMVEETTPAGET-TTAEQKPPRKPKNTGTALGVLAIAIALAIGVGLYINGKHQAQQQAAANQTLANQLSDLQQQAASDKQTLVQQLATQSSALDTAHQQQTAMSQQLDELKQKVATISGNDAHTWLLAQADYLVKLAGRKLWSDQDVTTAAALLKSADQSLADMNDPSLIDVRRALTQDISTLSAVSQVDYDGVILKLNQLSNGVDNLRLADNDSDGSPMDQDSGELSSSLREWRQNLVKSWHNFMDDFITIRRRDTTAEPLLAPNQDVYLRENIRSRLLIAAQAVPRHQDQIYKQSIDTVSTWVRAWFDTHDPATKAFLSQLDDLG…					MQLNKVLKGLMLALPVIAVAACSSHKNNNNDQTNGMG--DGAN---ANSGMN---SGNMSSDEQARLQMQELQKNNIVYFGLDKYDIQSEFAQMLDAHANFLRSNPSYKVTVEGHADERGTPEYNIALGERRATAVKMYLQGKGVSADQISIVSYGKEKPAVLGHDESAYAKNRRAVLVYMPVSLLALALSAFAIGTTEFVIMGLLPEVAGDLGVSIPSAGWLISGYALGVAIGAPIMALLTAKLPRKRTLMLLMVIFIIGNGLCALAYSYNLLMIARVVTALCHGAFFGIGAVVAASLVAPGKQASAVALMFTGLTLANVLGVPLGTWFGQLYGWRATFWGVSVIGVLAFIGLIVSLPTNRDEKPVHLASEIGALANGKLWLSLLMTVFFAAAMFALF…					-MKFKTE---IKPYKAAAGGWGSLEATTRFVFDSKQVLKNMRNLMRMNKAKGFDCPGCAWGD-DNKSTFSFCENGAKAVTWEATRRYVDASFFEKYSVSSLYQQSDYFLEYQGRLTEPLRYNRETDHYEPISWDDAFKLIAKYIKAMDNPDQMELYTSGRASNEASWLYQLFGRMNGSNNFPDCSNMCHEASGTGLKRSIGVGKGTIRLDDFDHADAIFVFGQNPGTNHPRMLHSLRHAADHGAKIVTFNTLRER					MGIFSRFADIVNANINSLLEKAEDPQKLVRLMIQEMEDTLVEVRSTSARALAEKKQLVRRIDQAEAQQTEWQDKAELALRKEKDDLARAALIEKQKLTELIVSLKREAEQVEETLTRMKGEIGELEKKLTETRARQQALTLRHQAASSSRDVRRQLDSGKIDEAMARFESFERRIDHMEAEAESQSFGKKKTLDQEFADLHADDEISEQLAALKAKMNRSE--MTDNNTALKKAGLKVTLPRLKILEVLQ--EPEGHHVSAEDLYKRLIDMGEEIGLATVYRVLNQFDDAGIVTRHNFEGGKSVFELTQQHHHDHLICLDCGKVIEFRDENIEARQRDIATRHGIKLSNHSLYLYGHCSTGDCREDETLHDK-MTDKLTSLRQLTTVVADTGDIAAMKL…					----------------------------MNQTDTRKESLEYNKLQKRLRRNVGNAIIDYNMIEENDVVMACMSGGKDSFAMLDILLNLKKVAPIHFDVVAVNLDQKQPGFPEHILPAYFEKLDIPYYIVDKDTYSVVREKIPEGKTTCGLCSRLRRGTLYSFAERIGATKIALGHHMDDIVETLFLNIFHGARMKAMPPKLRSDDGRNVVIRPLAYCREKDLIEYSEHKAFPIIPCNLCGSQENLQRQAIKSMLT					MTPTFIDTHCHFDFAPFSGNEEESLRLAAAAGVEKIIVVGVSADRFAGVMALAEQWPPLYAALGTHPMAIAQHDDS-HLDQLEAVLKQLPKKLVAIGEIGLDLFIDN--PQFDKQERVLDAQIRLAKQYDLPVILHSRRTHDKLALHLRRLDLPRRGVVHGFAGSEQQALAFIRAGYAIGVGGTITYERASKTRNTIARLPLTSLLLETDAPDMPLQGFQGQANRPERVKNVWQSLCELREESPQEIAETLLENTRTLFQL--------------VSEENVVLEEYRKHVAERAAEGIVPKPIDASQMAALVELLKNPPAGEEEFLSDLLINRVPPGVDEAAYVKAGFLAAVAAGEATSPLVTPEKAVELLGTMQGGYNIHPLIDALDNETLAPIAAKA…					MQLNKVLKGLMLALPVIAVAACSSHKNNNNDQTNGMG--DGAN---ANSGMN---SGNMSSDEQARLQMQELQKNNIVYFGLDKYDIQSEFAQMLDAHANFLRSNPSYKVTVEGHADERGTPEYNIALGERRATAVKMYLQGKGVSADQISIVSYGKEKPAVLGHDESAYAKNRRAVLVYMDQKRLTHLRQLEAESIHIIREVAAEFGNPVMMYSIGKDSSVMLHLARKAFYPGTLPFPLLHVDTGWKFREMYEFRDRTVKNIGAELLVHKNPEGVAMGINPFVHGSAKHTDIMKTEGLKQALNKYGFDAAFGGARRDEEKSRAKERIYSFRDRFHRWDPKNQRPELWHNYNGQINKGESIRVFPLSNWTELDIWQYIFLENIDIVPLYLAAPRPVLER…
>P_rwandensis					>P_rwandensis					>P_rwandensis					>P_rwandensis					>P_rwandensis					>P_rwandensis					>P_rwandensis					>P_rwandensis					>P_rwandensis					>P_rwandensis
--------------------MVTFQTNHGDIVIKTFDDKAPATVKNFLDYCREGFYDNTIFHRVINGFMVQGGGFEPGMKQKDTKEEIRNEANNGVKNTKGTLAMARTQAPHSATAQFFINVADNDFLNFRDESLQGWGYCVFAEVVEGMDVVEKIKAVKTGRSGMHQDVPVDDVVIQKVTVSE-MSQPAEHAPG----ANDITVGSVLRSPALLTRECLAGVITALALIPEVISFSVIAGVDPKVSLVASVVLC					MRLCDRDIEAWLDNGKLAIEPRPPVERINGATVDVRLGNQFRTFSGHTAPFIDLSGPKHEVSAALDRVMSDEIVLPEGEAFFLHPGELALAVTLESVTIPDDLVGWLDGRSSLARLGLMVHVTAHRIDPGWQGRIVLEFYNSGKLPLALRPGMLIGALSFEPLSGPAARPYNRREDAKYRGQQGADASRIDKD---------------VIMAQPHLLAERISRLSNALEKGLYERHHAIRLCLLAALSGESVFLLGPPGIAKSLIARRLKYAFQNARAFEYLMTRFSTPEEVFGPLSIQALKDEGRYQRLTKGYLPDAEIVFLDEIWKAGPAILNTLLTAINERRFRNGDSEEKIPMRLLVTASNELPEADSGLEALYDRMLIRLWLDNVHEKQNFRSM…					MSNQRIRIRLKAFDHRLIDQSTAEIVETAKRTGAQVRGPIPLPTRKERFTVLISPHVNKDARDQYEIRTHKRLVDIVEPTEKTVDALMRLDLAAGVDVQISLGMPVALLALALSAFAIGTTEFVIMGLLPEVAGDLQVSIPSAGWLISGYALGVAIGAPIMALLTAKLPRKRTLILLMVIFIIGNALCALAYTYNLLMLARVITALCHGAFFGIGAVVAASLVAPNRQASAVALMFTGLTLANVLGVPLGTWFGQLFGWRATFWGVAIIGILAFIALIVSLPTNKEEKPVHLASEVSALANVKLWLSLLMTVFFAAAMFALFSYIAPLLLQVTGMSNRGVTWTLFLIGAGLTVGNILGGKLADWKVSFSLILSFVLIAVFSLLFSWTSHALWLAELTLF…					MRKRFIAGAVCPQCQEKDTLALWRENNVEVVECVQCGHQMREADKQVRDKVRNNEQVIGIFHPEMTEQKAPSAMVEETTPA-DISPKPDNKKPRDKKNDGKVLSAVAIVIALAIGAGLYLNGKHQADLQAQTNQNLSEQLSALQQQLGSDKQQLTQQLDAANTALKEARTQQDNSAKELETLRDKVATISGNDTRTWLVAQADYLVKLAGRKLWSDQDVTTAAALLKSADTSLADMNDPSVMNVRRALTQDISSLSTVSQVDYDGIILKLNQLSNGVDNLRLADNDSDDSPMDADGGELSSSLHEWRQNLVKSWHNFMDDFITIRRRDNTAQPLLAPNQDVYLRENIRSRLLIAAQAVPRHQDEIYKQSIDAVSTWVRAWYDTNDAATKAFLAQLDELS…					MQLNKVLKGLMLALPVIAVAACSSHKNNNNDQT-GMGADNGAY----GAGQN----GNMSSDEQARLQMQQLQQNNIVYFGLDKYDVASDYAQMLDQHANFLRGNPSYKVTIEGHADERGTPEYNIALGERRANAVKMYLQGKGVSADQMSIVSYGKEKPAVLGHDEAAYAKNRRAVLVYMPVALLALALSAFAIGTTEFVIMGLLPEVAGDLQVSIPSAGWLISGYALGVAIGAPIMALLTAKLPRKRTLILLMVIFIIGNALCALAYTYNLLMLARVITALCHGAFFGIGAVVAASLVAPNRQASAVALMFTGLTLANVLGVPLGTWFGQLFGWRATFWGVAIIGILAFIALIVSLPTNKEEKPVHLASEVSALANVKLWLSLLMTVFFAAAMFALF…					-MKFKRK---IQPYRAAAGGWGSLEATTRFVLDSKAALKNMRNLMRMNKARGFDCPGCAWGD-DNKSTFSFCENGAKAVTWEATRRVVEPEFFAQHSVSTLYQQSDYFLEYQGRLTHPMRYNSATDHYEPISWDDALAMIARHLKAMDHPDQMELYTSGRASNEASWLYQLFGRVMGTNNFPDCSNMCHEASGTGLKRSIGVGKGTIRLDDFDHADAIFVIGQNPGTNHPRMLHSLRHAADHGAKIVTFNTLRER					MGIFSRFADIVNANINSLLERAEDPQKLVRLMIQEMEDTLVEVRSTSARALAEKKQLSRRIEQAEIQQAEWQEKAELAINKGKEDLARAALIEKQKLTDLIASLQQESTQVEETLERMKGEIGELEKKLTETRARQQALTLRHQAASSSRDVRRQLDSGKLDDAMARFESFERRIDHMEAEAESQRFGKPKGLDQEFAELKADDEISQQLAALKAKMNRSE--MTDNNSALKKAGLKVTLPRLKILEVLQGPGPESHHVSAEDLYKRLIDMGEEIGLATVYRVLNQFDDAGIVTRHNFEGGKSVFELTQQHHHDHLICLDCGKVIEFSDESIETRQREIATRHGIKLSNHSLYLYGHCAIGDCREDDTLHDK-MTDKLTSLRQLTTVVADTGDIAAMKL…					MLEGFIAAEAFFSRQRPLPSLSSVKIMSENQEVTKKNQYNLNKLQKRLRRNVGQAIADFNMIEEGDRIMVCLSGGKDSYTMLEILRNLQQSAPVNFSLVAVNLDQKQPGFPAHILPAYLEELGVEYKIVTEDTYSIVKEKIPEGKTTCSLCSRLRRGILYRTATELGCTKIALGHHRDDILQTMFLNMFYGGKMKGMPPKLMSDDGKHIVIRPLAYCREKDIIRFAEARQYPIIPCNLCGSQPNLQRQVVADMLRDWDKRYPGRIETMFSAMQNIVPSHMADINLFDFKGIKHGDDVVNGGDIGFDRETLPVQPVGWQPEDEDAAELSVRLDVLEIK-----VNNKVGLVKMRWVGAAVLLALYANNSWAFNIDDVAKQAKALAGKGYEAPKSNLPSQF…					--MRFIDTHCHFDFPPFVDDATGSIALAAQSGVERIIVPSVDASRFERVSQLAQQHDALYAALGLHPINIAEHNDA-HLGDLERWLQTPDTKRVAIGEIGLDLYMND--AQFGKQTRLLDAQLKLAKQYDLPVILHSRRTHDQLAMHLRRHNLPRRGVVHGFAGSQQQAERFIQLGYAIGVGGTITYERASKTRNTIANLPLASLLLETDAPDMPLQGFQGQPNRPERARNVFDVLCQIRSEPPEIIADALWHNS					MQLNKVLKGLMLALPVIAVAACSSHKNNNNDQT-GMGADNGAY----GAGQN----GNMSSDEQARLQMQQLQQNNIVYFGLDKYDVASDYAQMLDQHANFLRGNPSYKVTIEGHADERGTPEYNIALGERRANAVKMYLQGKGVSADQMSIVSYGKEKPAVLGHDEAAYAKNRRAVLVYMDQNRLTHLRQLEAESIHIIREVAAEFSNPVMMYSIGKDSSVMLHLARKAFYPGTLPFPLLHVDTGWKFREMYEFRDRTVKNMGAELLVHRNPEGVAMGINPFVHGSAKHTDIMKTEGLKQALNKYGFDAAFGGARRDEEKSRAKERIYSFRDRFHRWDPKNQRPELWHNYNGQINKGESIRVFPLSNWTELDIWQYIFLENIEIVPLYLAAPRPVLER…
>T_ptyseos					>T_ptyseos					>T_ptyseos					>T_ptyseos					>T_ptyseos					>T_ptyseos					>T_ptyseos					>T_ptyseos					>T_ptyseos					>T_ptyseos
--------------------MVTFQTNFGDIVIKTFDDKAPATVENFLTYCREGFYDNTIFHRVINGFMIQGGGFEPGMKQKSTNAEIRNEASNGLKNTRGTLAMARTSAPHSATAQFFINVADNDFLNFRDESVQGWGYCVFAEVVEGMDVVEKIKAVSTGRSGMHQDVPKEDVIIQKVTISE-MNQEQHSSSATHHAVDSPGMMSVFRQPALLTRESLAGIVTALALIPEVISFSVVAGVDPKVSLIASVVIC					MRLCDRDIESWLDDGRLEISPRPPVERINGATVDVRLGNQFRTFRGHTAAFIDLSGPKDEVSAALDRVMSEEIILPEGEAFFLHPGELALAVTLESVTLPADLVGWLDGRSSLARLGLMVHVTAHRIDPGWKGRIVLEFFNSGKLPLALRPGMLIGALSFEPLSGPAERPYNRRQDAKYRDQQGAVASRIDKD-----------------MALTHLLADRITRLSDMLEKGLYERHHTIRLCLLAALCGESVFLMGPPGIAKSLIARRLKYAFQDARAFEYLMTRFSTPEEVFGPLSIQALKDEGRYQRLTKGYLPEAEIVFLDEIWKAGPAILNTLLTAINERRFRNGDSETTIPMRLLITASNEFPEEDSGLTALYDRMLIRLCLDNVSSKNNFRNM…					MQNQRIRIRLKAFDHRLIDQSTAEIVETAKRTGAQVRGPIPLPTRKERFTVLISPHVNKDARDQYEIRTHKRLVDIVEPTEKTVDALMRLDLAAGVDVQISLGMPVALLALALSAFAIGTTEFVIMGLLPDVAANLHVSIPSAGWLISGYALGVAIGAPVMAMLTARLPRKRTLLLLMLIFILGNLLCATASGYSFLMLARVVTALCHGAFFGIGAVVASRLVAPERQASAVALMFTGLTLANVLGVPLGTWFGQLYGWRATFWAVSGIGLLAFIALMISLPVDKDEKPVSLMREVRALNNGKLWLSLLTTVWFSAAMFALFSYIAPMLIHITGISADGVSWTLFLMGAGLTLGNTLGGRLADRKLSLSLLLSFSLLTVFSLLFRWSSGEILLAEITLF…					MAKRFIAGAVCPHCQQTDTLAMWRENNVDVVECVKCGHQMREADKRLPDKHAGPGKIIGVFTPEMTEQKDPSAMPEVTPPEENLSPAAEKTSP--AKNSGTTLAIVAIIIALAAGGGSYWYSKQQQDAATRSLQSLDKQLSDLVQQSQAGQQQLSQQLNSATQALQDARLHQEATDKELSALRDKVTSLTGNDSSSWLIAQADYLVKLAGRKLWSDQDVTTAAALLKSADGSLAQMDDPSVLNVRRALTNDISTLSSINQVDYDGIILQLNQLSNGVDNLRLADDEGSNNPMDADSKELSGSLAHWRENLEKSWHDFMDNFITIRRRDNTAQPLLAPNQDIYLRENIRSKLLIAAQAVPRHQNEIYKQSLESVSSWVRAWYDTSDPATKAFLSQIDALE…					MQLNKMLKGLMLALPVLAVAACSSHKNDNDQSGSTTGA-DSAY----GSGQN---GGNMSSDEQARMQMQQLQQNNIVYFGLDKYDIQPEYARMLDQHANFLRSNPSYKVTIEGFADERGTPEYNIALGERRANAVEMYLQGKGVSADQMSIVSYGKEKPAVLGHDEAAWAKNRRAVLVYMPVALLALALSAFAIGTTEFVIMGLLPDVAANLHVSIPSAGWLISGYALGVAIGAPVMAMLTARLPRKRTLLLLMLIFILGNLLCATASGYSFLMLARVVTALCHGAFFGIGAVVASRLVAPERQASAVALMFTGLTLANVLGVPLGTWFGQLYGWRATFWAVSGIGLLAFIALMISLPVDKDEKPVSLMREVRALNNGKLWLSLLTTVWFSAAMFALF…					-MKFKRQ---IKPYRAAAGGWGSLEATTRFVFDSKAALKNMRNLMRMNKARGFDCPGCAWGD-DNKSTFSFCENGAKAVTWEATRRTVDPDFFAQHSVSRLYAESDYFLEYQGRLTHPLSYNPDTDHYEPVSWEDAFTLIAQHIHAMDNPDQIELYTSGRASNEASWLYQLFGRMLGTNNFPDCSNMCHEASGTGLKRSIGVGKGTIRLDDFESADAIFVFGQNPGTNHPRMLHSLRHAAEHGASIVTFNTLRER					MGIFSRFTDIVNANINSLLERAEDPQKMVRLMIQEMEDTLIEVRTTSARALAEKKQLSRRIEQATAQSREWQEKAELAIRKEKEDLARAALQEKQKLNGVIEALQQEIAQTEESLNRMKTEITELENKLTETRARQQALTLRHQAASASRDVRRQLDSGKMDQAMARFESFERRIDHMEAEAESQRFGKPQSLESQFASLKTDDEISQQLAALKEKMQRTDGQMTDNNSALKKAGLKVTLPRLKILEVLQ--EPECHHVSAEDLYKRLIDMGEEIGLATVYRVLNQFDDAGIVTRHNFEGGKSVFELTQQQHHDHLICLDCGKVIEFSDESIEQRQREIAKRFGIKLTNHSLYLYGHCTTGDCREDDTLHNDKMTDKLSSLRKITTVVADTGDIEAMKL…					----------------------------MNQTDTRKDTLEFNKLQKRLRRNVGNAITDYQMIEENDVVMACMSGGKDSFAMLDILLSLQKVAPVSFEVIAVNLDQKQPGFPEHILPDYFEQLNIPYYIVDKDTYSVVREKIPEGKTTCGLCSRLRRGTLYSFAEKIGATKIALGHHMDDIVETLFLNMFHGARMKAMPPKLRSDDGRNVVIRPLTYCREKDLIRFADHKAFPIIPCNLCGSQENLQRQAIKGMLS					--VRFIDTHCHFDFPPFAEHEAEELTRARHAGVQGIVIPAVTASRFSQIISLCERFPSLWYAPGLHPLWIAEHTAE-DVDCLQQCLQQGGDKLVALGEAGLDFYTEELAAQADKQRSLLQSQLTLARRYDLPVILHSRRSHDPLTALLRKADLPAGGVIHGFSGSLQQASAFVRLGFAIGVGGTITYPRARKTRETIASLPLSALVLETDAPDMPVHGSQGQPNRPEHVVTILQALAELRPEPPEQLAETLWQNS					MQLNKMLKGLMLALPVLAVAACSSHKNDNDQSGSTTGA-DSAY----GSGQN---GGNMSSDEQARMQMQQLQQNNIVYFGLDKYDIQPEYARMLDQHANFLRSNPSYKVTIEGFADERGTPEYNIALGERRANAVEMYLQGKGVSADQMSIVSYGKEKPAVLGHDEAAWAKNRRAVLVYMDQKRLTHLRQLEAESIHIIREVAAEFSNPVMMYSIGKDSSVMLHLARKAFYPGKLPFPLLHVDTGWKFREMYEFRDRTVKAIGAELLVHRNPEGVAMGINPFVHGSAKHTDIMKTEGLKQALNKYGFDAAFGGARRDEEKSRAKERLYSFRDRFHRWDPKNQRPELWHNYNGQINKGESIRVFPLSNWTELDIWQYIFLENIEIVPLYLAAERPVLER…
Tree					Tree					Tree					Tree					Tree					Tree					Tree					Tree					Tree					Tree
(P_anthophila:0.01940,P_deleyi:0.02361,(P_sp_aB:0.01576,(((P_conspicua:0.02237,(P_septica:0.05314,((P_sp_A4:0.08418,((T_morbirosei:0.07822,(T_sp_NML_06:0.08506,T_ptyseos:0.05988)1.000:0.02775)1.000:0.10992,(E_billingiae:0.05799,(E_tasmaniensis:0.03060,E_pyrifoliae:0.03130)1.000:0.05545)1.000:0.08034)1.000:0.02638)1.000:0.01522,((P_sp_At-9b:0.01432,P_cypripedii:0.01477)1.000:0.02212,((P_sp_GM01:0.…					(P_wallisii:0.02797,((P_sp_GM01:0.02783,(P_rodasii:0.02487,P_rwandensis:0.01738)1.000:0.01498)0.965:0.00855,((P_sp_At-9b:0.01901,P_cypripedii:0.01714)1.000:0.01873,((P_sp_A4:0.08847,((T_morbirosei:0.07576,(T_sp_NML_06:0.09465,T_ptyseos:0.07063)1.000:0.03318)1.000:0.13039,(E_billingiae:0.07417,(E_tasmaniensis:0.02934,E_pyrifoliae:0.03316)1.000:0.07063)1.000:0.06214)1.000:0.03248)1.000:0.01902,(P_s…					(((P_sp_At-9b:0.01829,P_cypripedii:0.01933)1.000:0.01929,((P_sp_A4:0.10935,((T_morbirosei:0.07890,(T_sp_NML_06:0.09372,T_ptyseos:0.06569)1.000:0.03468)1.000:0.14209,(E_billingiae:0.06816,(E_tasmaniensis:0.03205,E_pyrifoliae:0.04129)1.000:0.07843)1.000:0.05295)1.000:0.02966)1.000:0.01720,(P_septica:0.06115,(((P_s_indologenes:0.00055,P_s_stewartii:0.00255)1.000:0.02210,(P_allii:0.01233,P_ananatis:0…					((P_agglomerans:0.00793,(P_sp_aB:0.01246,P_vagans:0.00616)0.991:0.00271)0.999:0.00423,((((P_s_indologenes:0.00082,P_s_stewartii:0.00330)1.000:0.01842,(P_allii:0.01315,P_ananatis:0.01135)1.000:0.01082)1.000:0.04000,(P_septica:0.06938,((((P_sp_GM01:0.02880,(P_rodasii:0.02016,P_rwandensis:0.01732)1.000:0.01587)1.000:0.01189,(P_sp_At-9b:0.01439,P_cypripedii:0.01630)1.000:0.03144)0.000:0.00648,((P_dis…					(P_dispersa:0.02172,((P_sp_GM01:0.02848,(P_rodasii:0.01951,P_rwandensis:0.01445)1.000:0.01415)1.000:0.01057,((P_sp_At-9b:0.01613,P_cypripedii:0.01681)1.000:0.02064,((P_sp_A4:0.08573,((T_morbirosei:0.06383,(T_sp_NML_06:0.08476,T_ptyseos:0.06190)1.000:0.02993)1.000:0.11440,(E_billingiae:0.06489,(E_tasmaniensis:0.02588,E_pyrifoliae:0.03162)1.000:0.06025)1.000:0.05120)1.000:0.02336)1.000:0.01557,(P_s…					(P_agglomerans:0.00868,P_sp_aB:0.00898,(P_vagans:0.00746,(P_deleyi:0.02067,(P_anthophila:0.01598,((((P_s_indologenes:0.02423,P_s_stewartii:0.00240)1.000:0.01573,(P_allii:0.01773,P_ananatis:0.01074)1.000:0.01024)1.000:0.03734,(P_septica:0.05012,(((P_sp_At-9b:0.01566,P_cypripedii:0.01567)1.000:0.01768,((P_sp_GM01:0.02208,(P_rodasii:0.01677,P_rwandensis:0.01303)1.000:0.01285)1.000:0.00962,(P_wallisi…					(P_agglomerans:0.00887,P_sp_aB:0.01240,(P_vagans:0.00911,(P_deleyi:0.02034,(P_anthophila:0.02062,((((P_s_indologenes:0.00137,P_s_stewartii:0.00404)1.000:0.02589,(P_allii:0.01712,P_ananatis:0.01419)1.000:0.01088)1.000:0.04726,(P_septica:0.06248,(((P_sp_At-9b:0.02100,P_cypripedii:0.01911)1.000:0.02047,((P_sp_GM01:0.02797,(P_rodasii:0.02393,P_rwandensis:0.01932)1.000:0.01341)1.000:0.01279,(P_dispers…					(P_sp_aB:0.01212,P_vagans:0.01120,(P_agglomerans:0.00965,(P_deleyi:0.03239,(P_anthophila:0.02008,((((P_s_indologenes:0.00083,P_s_stewartii:0.00257)1.000:0.02490,(P_allii:0.01410,P_ananatis:0.01406)1.000:0.01037)1.000:0.05699,(P_septica:0.07040,(((P_sp_At-9b:0.02192,P_cypripedii:0.01798)1.000:0.02499,((P_sp_GM01:0.03083,(P_rodasii:0.02384,P_rwandensis:0.02337)1.000:0.01770)1.000:0.01028,((P_disper…					(P_vagans:0.01244,P_sp_aB:0.01103,(P_agglomerans:0.00996,(P_deleyi:0.02947,(P_anthophila:0.01998,((((P_s_indologenes:0.00074,P_s_stewartii:0.00213)1.000:0.02274,(P_allii:0.01668,P_ananatis:0.01594)1.000:0.01190)1.000:0.05301,(P_septica:0.05698,(((P_sp_At-9b:0.01834,P_cypripedii:0.02059)1.000:0.02430,((P_sp_GM01:0.03008,(P_rodasii:0.01640,P_rwandensis:0.02184)1.000:0.01114)1.000:0.01269,(P_eucrina…					(P_anthophila:0.01596,P_deleyi:0.02086,(((((P_s_indologenes:0.00087,P_s_stewartii:0.00326)1.000:0.02251,(P_allii:0.01614,P_ananatis:0.01113)1.000:0.00961)1.000:0.03795,(P_septica:0.05644,(((P_sp_At-9b:0.01463,P_cypripedii:0.02029)1.000:0.01963,((P_sp_GM01:0.02625,(P_rodasii:0.02462,P_rwandensis:0.01513)1.000:0.01563)1.000:0.00909,((P_eucrina:0.05831,P_wallisii:0.03373)0.284:0.00609,P_dispersa:0.0…

## Sheet: 60 genes
Supplementary File S7.3 Randomised gene subset datasets constructed with 60 genes
Dataset 1					Dataset 2					Dataset 3					Dataset 4					Dataset 5					Dataset 6					Dataset 7					Dataset 8					Dataset 9					Dataset 10
FILE	START POSITION SUPERMATRIX	END POSITION SUPERMATRIX			FILE	START POSITION SUPERMATRIX	END POSITION SUPERMATRIX			FILE	START POSITION SUPERMATRIX	END POSITION SUPERMATRIX			FILE	START POSITION SUPERMATRIX	END POSITION SUPERMATRIX			FILE	START POSITION SUPERMATRIX	END POSITION SUPERMATRIX			FILE	START POSITION SUPERMATRIX	END POSITION SUPERMATRIX			FILE	START POSITION SUPERMATRIX	END POSITION SUPERMATRIX			FILE	START POSITION SUPERMATRIX	END POSITION SUPERMATRIX			FILE	START POSITION SUPERMATRIX	END POSITION SUPERMATRIX			FILE	START POSITION SUPERMATRIX	END POSITION SUPERMATRIX
gene516	1	594			gene917	1	164			gene902	1	339			gene1109	1	197			gene495	1	173			gene203	1	190			gene168	1	526			gene35	1	265			gene1046	1	610			gene321	1	341
gene165	595	1038			gene730	165	466			gene732	340	621			gene553	198	366			gene467	174	303			gene680	191	364			gene452	527	686			gene768	266	501			gene158	611	754			gene1278	342	477
gene1309	1039	1225			gene523	467	827			gene268	622	958			gene1059	367	733			gene123	304	746			gene942	365	642			gene754	687	1068			gene1305	502	725			gene273	755	1208			gene294	478	1124
gene234	1226	1464			gene378	828	937			gene312	959	1222			gene445	734	1367			gene1158	747	1064			gene530	643	702			gene1077	1069	1457			gene165	726	1169			gene301	1209	1496			gene953	1125	1468
gene1128	1465	1739			gene212	938	1042			gene1255	1223	1827			gene1326	1368	1575			gene1271	1065	1292			gene133	703	963			gene1277	1458	2173			gene274	1170	1529			gene86	1497	1927			gene634	1469	2113
gene19	1740	2075			gene1055	1043	1233			gene1165	1828	2050			gene976	1576	1864			gene607	1293	1607			gene1216	964	1152			gene624	2174	2627			gene172	1530	1673			gene1074	1928	2515			gene971	2114	2319
gene1054	2076	2186			gene599	1234	1537			gene458	2051	2432			gene1254	1865	1928			gene1120	1608	1856			gene729	1153	1487			gene1071	2628	2702			gene190	1674	1748			gene1129	2516	2656			gene1106	2320	2460
gene75	2187	2304			gene1135	1538	1678			gene235	2433	3252			gene383	1929	2067			gene1	1857	2003			gene1287	1488	1739			gene1120	2703	2951			gene927	1749	1867			gene662	2657	2849			gene1136	2461	2939
gene316	2305	2712			gene525	1679	1914			gene569	3253	4113			gene423	2068	2691			gene1055	2004	2194			gene1136	1740	2218			gene871	2952	3457			gene435	1868	2155			gene210	2850	2945			gene934	2940	3202
gene666	2713	2892			gene996	1915	2239			gene912	4114	4417			gene68	2692	3074			gene732	2195	2476			gene226	2219	2680			gene1090	3458	3650			gene304	2156	2306			gene148	2946	3118			gene489	3203	3479
gene829	2893	3339			gene853	2240	2484			gene1042	4418	4893			gene923	3075	3318			gene529	2477	2809			gene1051	2681	2972			gene287	3651	3897			gene1192	2307	2519			gene652	3119	3337			gene883	3480	3795
gene150	3340	3450			gene818	2485	2956			gene591	4894	5105			gene1079	3319	3899			gene270	2810	3125			gene964	2973	3193			gene1211	3898	4055			gene1247	2520	2643			gene194	3338	3405			gene1033	3796	4159
gene962	3451	4136			gene280	2957	3374			gene376	5106	5487			gene229	3900	4020			gene796	3126	3387			gene52	3194	3545			gene124	4056	4265			gene837	2644	3208			gene1134	3406	3623			gene954	4160	4451
gene649	4137	4295			gene1306	3375	3571			gene272	5488	5982			gene819	4021	4316			gene1200	3388	3697			gene1188	3546	3635			gene830	4266	5296			gene275	3209	3646			gene84	3624	4301			gene889	4452	4634
gene47	4296	4528			gene453	3572	3928			gene704	5983	6371			gene1001	4317	5190			gene144	3698	3835			gene604	3636	3866			gene561	5297	5924			gene1217	3647	3854			gene1029	4302	5177			gene196	4635	5215
gene2	4529	5014			gene1009	3929	4828			gene61	6372	6816			gene280	5191	5608			gene623	3836	4183			gene1113	3867	4239			gene1069	5925	6100			gene1140	3855	3994			gene633	5178	5450			gene235	5216	6035
gene565	5015	5624			gene1297	4829	5081			gene168	6817	7342			gene645	5609	6000			gene276	4184	4591			gene238	4240	4556			gene81	6101	6410			gene369	3995	4406			gene937	5451	5617			gene930	6036	6376
gene737	5625	5963			gene941	5082	5372			gene625	7343	7695			gene367	6001	6098			gene1002	4592	4707			gene27	4557	4794			gene639	6411	6894			gene263	4407	4875			gene758	5618	5751			gene1071	6377	6451
gene124	5964	6173			gene738	5373	5469			gene116	7696	8240			gene700	6099	6766			gene773	4708	4828			gene389	4795	4997			gene498	6895	7050			gene692	4876	5342			gene599	5752	6055			gene758	6452	6585
gene219	6174	6448			gene57	5470	5976			gene459	8241	8796			gene660	6767	7119			gene1256	4829	5011			gene789	4998	5320			gene84	7051	7728			gene123	5343	5785			gene865	6056	6816			gene22	6586	7295
gene1179	6449	6777			gene196	5977	6557			gene318	8797	9081			gene436	7120	7958			gene411	5012	5607			gene1086	5321	5449			gene751	7729	7837			gene975	5786	5928			gene63	6817	7177			gene1336	7296	7874
gene872	6778	7389			gene786	6558	7166			gene1180	9082	9409			gene1086	7959	8087			gene183	5608	6034			gene1211	5450	5607			gene336	7838	8083			gene235	5929	6748			gene1183	7178	7362			gene411	7875	8470
gene648	7390	7538			gene216	7167	7312			gene811	9410	9687			gene451	8088	8396			gene1073	6035	6441			gene1205	5608	5771			gene221	8084	8546			gene567	6749	7131			gene713	7363	7568			gene519	8471	8673
gene202	7539	7984			gene37	7313	8032			gene522	9688	10102			gene679	8397	8519			gene611	6442	6959			gene603	5772	6156			gene848	8547	8958			gene675	7132	7450			gene407	7569	7709			gene329	8674	9245
gene274	7985	8344			gene1113	8033	8405			gene644	10103	10415			gene47	8520	8752			gene479	6960	7139			gene241	6157	6539			gene527	8959	9056			gene270	7451	7766			gene1314	7710	8161			gene197	9246	10545
gene1228	8345	8488			gene298	8406	8524			gene683	10416	10616			gene222	8753	9162			gene268	7140	7476			gene1130	6540	6751			gene916	9057	9710			gene416	7767	7896			gene1244	8162	8362			gene1035	10546	10994
gene1158	8489	8806			gene1172	8525	8848			gene209	10617	10765			gene528	9163	9750			gene598	7477	7890			gene812	6752	7050			gene1147	9711	9863			gene831	7897	8364			gene1194	8363	8504			gene677	10995	11246
gene601	8807	9030			gene616	8849	9060			gene880	10766	11364			gene219	9751	10025			gene1218	7891	8049			gene269	7051	7202			gene1146	9864	10366			gene603	8365	8749			gene225	8505	8829			gene137	11247	11337
gene951	9031	9328			gene204	9061	9256			gene502	11365	11698			gene890	10026	10297			gene450	8050	8909			gene544	7203	7920			gene711	10367	10650			gene413	8750	9183			gene807	8830	9134			gene1206	11338	11780
gene1210	9329	9500			gene575	9257	9507			gene743	11699	12273			gene1003	10298	10396			gene430	8910	9081			gene633	7921	8193			gene335	10651	10908			gene21	9184	9419			gene1344	9135	9599			gene1344	11781	12245
gene68	9501	9883			gene984	9508	10803			gene1303	12274	12482			gene796	10397	10658			gene1336	9082	9660			gene404	8194	8977			gene553	10909	11077			gene539	9420	9817			gene800	9600	9896			gene630	12246	12472
gene100	9884	10119			gene954	10804	11095			gene1058	12483	12764			gene1308	10659	11057			gene718	9661	9932			gene473	8978	9365			gene186	11078	11936			gene207	9818	10056			gene614	9897	10233			gene74	12473	12690
gene199	10120	10454			gene1054	11096	11206			gene609	12765	12846			gene1321	11058	11648			gene1285	9933	10190			gene1274	9366	9564			gene202	11937	12382			gene788	10057	10323			gene125	10234	10417			gene399	12691	12882
gene35	10455	10719			gene296	11207	12077			gene709	12847	13721			gene686	11649	12019			gene1346	10191	10655			gene160	9565	9870			gene90	12383	12758			gene663	10324	10655			gene359	10418	10834			gene730	12883	13184
gene1121	10720	11151			gene672	12078	12524			gene920	13722	13941			gene1199	12020	12106			gene742	10656	11081			gene811	9871	10148			gene181	12759	13074			gene781	10656	10907			gene449	10835	11041			gene1298	13185	13497
gene750	11152	11370			gene1065	12525	13219			gene797	13942	14473			gene681	12107	12425			gene1025	11082	11512			gene224	10149	10392			gene1135	13075	13215			gene362	10908	11008			gene297	11042	11168			gene33	13498	13766
gene322	11371	11521			gene582	13220	13536			gene1193	14474	14603			gene833	12426	12733			gene792	11513	12088			gene252	10393	10683			gene983	13216	13661			gene1018	11009	11367			gene1067	11169	11462			gene364	13767	14043
gene670	11522	11637			gene741	13537	14180			gene575	14604	14854			gene1090	12734	12926			gene82	12089	12704			gene865	10684	11444			gene1307	13662	14169			gene185	11368	11812			gene1007	11463	11574			gene267	14044	14206
gene997	11638	11862			gene419	14181	14394			gene177	14855	15153			gene336	12927	13172			gene181	12705	13020			gene94	11445	11842			gene1138	14170	14609			gene877	11813	12724			gene1094	11575	11833			gene71	14207	14665
gene531	11863	12114			gene1199	14395	14481			gene1325	15154	15273			gene416	13173	13302			gene789	13021	13343			gene251	11843	12013			gene921	14610	14849			gene780	12725	13048			gene419	11834	12047			gene274	14666	15025
gene3	12115	12629			gene522	14482	14896			gene745	15274	15632			gene499	13303	13676			gene807	13344	13648			gene509	12014	12786			gene815	14850	15094			gene31	13049	13277			gene366	12048	12221			gene1099	15026	15685
gene271	12630	12736			gene1013	14897	15222			gene590	15633	15760			gene626	13677	13953			gene375	13649	13841			gene769	12787	12952			gene27	15095	15332			gene1126	13278	13908			gene1180	12222	12549			gene522	15686	16100
gene859	12737	12950			gene124	15223	15432			gene841	15761	16068			gene40	13954	14267			gene744	13842	14240			gene302	12953	13114			gene742	15333	15758			gene330	13909	14042			gene838	12550	12796			gene1076	16101	16443
gene1270	12951	13183			gene656	15433	15946			gene1069	16069	16244			gene1030	14268	14445			gene954	14241	14532			gene716	13115	13577			gene535	15759	16007			gene940	14043	14439			gene763	12797	12865			gene1073	16444	16850
gene1042	13184	13659			gene613	15947	16040			gene637	16245	16344			gene148	14446	14618			gene1197	14533	14998			gene368	13578	13880			gene5	16008	16217			gene894	14440	14642			gene146	12866	12990			gene503	16851	17044
gene230	13660	13842			gene2	16041	16526			gene1107	16345	16600			gene1347	14619	14912			gene110	14999	15199			gene358	13881	14247			gene1118	16218	16475			gene509	14643	15415			gene1204	12991	13187			gene804	17045	17139
gene337	13843	13997			gene731	16527	16865			gene685	16601	17490			gene1039	14913	15039			gene314	15200	15482			gene1123	14248	14726			gene744	16476	16874			gene565	15416	16025			gene632	13188	13487			gene950	17140	17202
gene827	13998	14210			gene1155	16866	17160			gene948	17491	17634			gene946	15040	15346			gene624	15483	15936			gene438	14727	14795			gene397	16875	17192			gene372	16026	16393			gene846	13488	14062			gene250	17203	18286
gene1037	14211	14371			gene834	17161	17530			gene1244	17635	17835			gene1137	15347	16320			gene478	15937	16444			gene76	14796	15163			gene62	17193	17370			gene58	16394	16678			gene990	14063	14305			gene816	18287	18544
gene224	14372	14615			gene20	17531	18097			gene88	17836	18254			gene808	16321	16450			gene480	16445	16722			gene1272	15164	15446			gene414	17371	17487			gene15	16679	17285			gene608	14306	14524			gene491	18545	18800
gene104	14616	14934			gene254	18098	18376			gene1335	18255	18728			gene179	16451	16648			gene865	16723	17483			gene461	15447	15622			gene1197	17488	17953			gene1291	17286	17654			gene938	14525	14751			gene284	18801	19703
gene82	14935	15550			gene661	18377	18568			gene255	18729	19059			gene375	16649	16841			gene797	17484	18015			gene1346	15623	16087			gene176	17954	18278			gene349	17655	17913			gene311	14752	15034			gene689	19704	20091
gene320	15551	16362			gene393	18569	18865			gene1100	19060	19443			gene860	16842	17195			gene189	18016	18146			gene577	16088	16615			gene375	18279	18471			gene468	17914	18028			gene827	15035	15247			gene493	20092	20399
gene993	16363	16588			gene978	18866	19300			gene1037	19444	19604			gene26	17196	17482			gene944	18147	18302			gene1288	16616	16894			gene89	18472	18849			gene4	18029	18650			gene85	15248	15741			gene620	20400	20696
gene645	16589	16980			gene416	19301	19430			gene303	19605	20092			gene857	17483	17557			gene215	18303	18396			gene1088	16895	17297			gene644	18850	19162			gene297	18651	18777			gene447	15742	15846			gene968	20697	21512
gene840	16981	17201			gene743	19431	20005			gene310	20093	20222			gene761	17558	18089			gene48	18397	18568			gene6	17298	17629			gene399	19163	19354			gene126	18778	19123			gene275	15847	16284			gene956	21513	22070
gene842	17202	17486			gene305	20006	20244			gene1273	20223	20585			gene537	18090	18272			gene1311	18569	18825			gene383	17630	17768			gene342	19355	19900			gene350	19124	19509			gene716	16285	16747			gene438	22071	22139
gene182	17487	17926			gene390	20245	20559			gene1118	20586	20843			gene34	18273	18434			gene1083	18826	19163			gene1152	17769	17898			gene1233	19901	20030			gene511	19510	19925			gene887	16748	17147			gene104	22140	22458
gene611	17927	18444			gene737	20560	20898			gene392	20844	21302			gene767	18435	19119			gene416	19164	19293			gene276	17899	18306			gene190	20031	20105			gene618	19926	20285			gene488	17148	17230			gene182	22459	22898
gene1150	18445	18755			gene848	20899	21310			gene1206	21303	21745			gene137	19120	19210			gene1259	19294	19495			gene1084	18307	18550			gene1187	20106	20389			gene1253	20286	20475			gene570	17231	17331			gene617	22899	23324
Data matrix					Data matrix					Data matrix					Data matrix					Data matrix					Data matrix					Data matrix					Data matrix					Data matrix					Data matrix
>P_brenneri					>P_septica					>T_morbirosei					>P_allii					>P_wallisii					>P_s_stewartii					>P_s_stewartii					>P_conspicua					>T_sp_NML_06					>P_s_stewartii
MDKTRQQHLTRWLRQQRHFAGRWLRLSTLLGVVSALLIIVQAALLASLLQALIIEQQPRAALAGKMLLLLLCFVLRAAINYARERVGYRAGQAIRQALRKQVLDRLSALGPAWIQGKPAGSWATLLLEQIEEMQDYYARYLPQMTLAVLIPCCILLAIFPLNWTAGLILFATAPLIPLFMALVGMGAAEANRRNFLVLARLSGNFLDRLRGRETLRLFHRGAAEQQAVAVATTDFRQRTMEVLRLAFLSSAVLEFFASLAIAVVAVYFGFSYLGELHFGDYSQGVTLFAGFLVLILAPEFFQPLRDLGAFYHAKAQAVGGADALEQFMQGSPTSGPSQGDTPFTATGPLDLAAVDLLICAPDGQPLCGPLNFTLAPGERVALVGQSGAGKTALMNALLG…					VNTRRRQRLYVVVAILVGLGLATSLVMYALRSNIDLFYTPSEILYGKGEDH-QKPEAGQRLRVGGMVMPGSVKRDPNTLAVSFKLYDANGVVSVSFEGILPDLFREGQGVVAQGVLEEGNLVNAKEVLAKHDEKYTPPEIEDAMKKNHKSPQALAEQA--RTQSMSAYKSKVKKAVIPVAGLGTRMLPATKAIPKEMLPLVDKPLIQYVVNECIAAGINEIVLVTHSSKNSIENHFDTSFELEAMLEKRVKRQLLDEIQSICPPHVTIMQVRQGIAKGLGHAVMCAHPLIGDEPVAVILPDVIIDEYESNPTKDNLAEMLSRFDESGRSQIMVEPVADVTAYGVVDCQGAELQPGDSAPMVGVVEKPKATEAPSNLAVVGRYVLSADIWPLLAKTPPGA…					--------------------------------MNFLFPLGAVIIWAINSIVSKLTVGVITPEAISFYRWIIALVILTPFVLPSVIRNRAALSREWLKLLILGALGMVLYQSLAYYAARTVSALFIGIIVASIPLLTIIFSLFILRLTPTLGIVFGAILSFSGLTWLISQGHPQQLFTHGLGSGELMMIVAAAAYALYGVLTKRWSMN---LPQWQSLYVQILFAVLLLIPGFLLTPNIALTVHSIPLVLYAAIPA					MQKVVLATGNPGKVRELADLLAAFGLDIVAQTELGVESAEETGLTFIENAILKARHAAQLTGLPALADDSGLAVNALGGAPGIYSARYAGEEASDQQNLEKLLQALENTPDGQRQAQFHCVLVYLRHASDPTPLVFHGSWDGEITRTAAGNGGFGYDPVFYVPALGKTAAELTKAEKGNVSHRGKALTLLLEAMRNA----------------LSSV-----PATHGGWITELRYSEQ-PGMMQMLLLPLLQQLSQQSRWQLWLTPAHKLSRAWMQESGLPLEKSMHIADAERYNAVEAMIKALRTGNYSVVLAWIPYELDEDERRELELAAAEGKALGLILRSGETPKTAVRPESSLKIQSDLFHMNKVLLYCRSGFEKECAAEISAKAAEHNVYGFP…					MGKPTGEFVALHVAVMTVSDSRDASSDTSGDYLREALAEAGHQVVDRAIIADNRYRIRATVSRWIASDDVQVVIINGGTGFNSKNSTPEALLPLFDREIDGFGELFRMISYEEIGSSTLQSRAVAGLANQTLIFAVPGSTSGCRSAWERIIEEQLDARTRPCNFVSHLKKL-------------------------------------------------------------------MDSFFAKFIMWGILTALAYHAASGIRHMLADFGFTAETLQVGTRTAQAVFVITVVLSILAGVLVWMDSLKTQYHAHIRTLQQRAQQVLARFKLDAMLIHSGELLTVFLDDHDYPFKVNPQFKAWVPVTQVPNCWLWIDGVNKPKLWFYSPVDYWHNVEPLP…					MKALNAVAIVLTAMLLQGCVAVVAGSAAVATKTATDPRSVGTQVDDGTLELRVSNALAKDQQIKTDARVIATAYQGKVLLTGQAPNQEVANRAKQIAMGVDGATEVYNEIRIGPKVSLGTSSADTWITTKIRSQLLGSDQVKSSSVKVTTENGEVFLLGLVTPEEAKAAADIASRVSGVKHVTTAFTMVKMSKKLWLGLVLILILSWIGLR-P--------------YLTSAPA--------KTSAAD------IAALTDVRTVARWVLQHQQLPDYYITKKQARRLGWNPAKGNLCDVLPGRAIGGDRFSNRERKLPERSDRQWYEADVNYRCGHREADRLVYSSDGLVFLSTDHYRSFKPVQMFAASQKRVLPGFGLSLGTSLLFTCLILLLPISAL…					------------------------------------------------MANNIRIEEDLLGMREVPADAYYGVHTLRAIENFYISNSKISDIPEFVRGMVMVKKAAAMTNKELQTLPRDIANTIIQACDEVLNNGRCMDQFPVDVYQGGAGTSVNMNTNEVLANIGLELMGHQKGEYQYLNPNDHVNKCQSTNDAYPTGFRIAVYSSLLKLLDGISQLADGFQRKADEFQTILKMGRTQLQDAVPMTLGQEFHAY					-----------MIAKNEAELLPDCLASVSWADEIVVLDSGSEDNSVAIATQAGAKVYRNDDWQGYGVQRQRAQQYASGDMILMIDADERVTPELRAAIEQVLIAP-PSRTVYSLGRSNLFLGRFMRHSGWYPDRVMRLYPPTLHYNGNLVHESLNAEDAPVVALKGDLQHLTCRDLVAFQRKQLAYAEAWATERHQRGKRCGLFSIFSHTLGAFVKTLLLRAGFLDGKQGWILAVVNAQYTFNKYSALWALN---					MTNQAP---QLPLSAEQLTQLQSATQDFSVTQLAWLSGYFWGRISGDPQDNTASALTAKT--PQAAAPTPTVTLLSASQTGNARRLAEQVRDDLLAHDIAVNLINAGDYKFKQIAQEKWLVVVTSTQGEGEPPEEAVALHKYLMSKKAPKL-NETAFAVFGLGDSSYEFFCQAGKDFDQRLADLGAERLLDRGDADVDYQAAADAWREQVVATLKQRLPASSASQVSQAAAGASDEIDSTPYTKEQPLVATLSVSQKITGDDSQKDIRHLEIDLGESGLRYTPGDALGVWFDNDPALVQELLDLLVLDGSQSISLNGEPLPLAQALQKHLELTVNTAQIVEKYAHLSANSELLALVGDKASLQAYAQQWPIVDMVRHAPAELSAEQLTELLRPLTPRLY…					MSSIRLADLAQQLDAELYGDGDIAISGIASMQSATTGQITFLANSRYREQLALVQASAVVLTEADLEWCKTAALVVKNPYLTYARMAQLLDTTPQPAQDIAPSALIDPSARLGANVSVGANAVIESDVELGDNVVIGAGCFVGKKTRIGSGTRLWANVSVYHEVVIGQHCLIQSGTVIGSDGFGYANDRGNWVKIPQLGSVIIGDRVEIGACTTIDRGALDNTLIGNGVIIDNQCQIAHNVVIGDNTAVAGGVIMAGSLKIGRYCMIGGASVINGHMEICDKVTVTGMGMVMRPITEPGVYSSGIPLQPNKTWRKTAALVMNIDDMSKRLKAIERKVGKDD-MKEKSEDGVRLDKWLWAARFYKTRSIAREMIEGGKVHYNGQRSKPSKLVERDAELTL…
>P_rodasii					>P_dispersa					>P_conspicua					>P_brenneri					>E_pyrifoliae					>T_ptyseos					>P_sp_At-9b					>T_ptyseos					>P_agglomerans					>P_sp_At-9b
-----------------------LRAASLFGFAGALVIIAQAWLLASLLQNLIVAQQPRGTLLTDFMLLLLCFVLRAGLHYAREMAGYRAGVTIRRALRKQVLDRLNELGPAWIQGKPAGSWATLLLEQIEEMQEYYARYLPQMSLAAFIPCAILVAIFPVNWAAGLILLATAPLIPLFMAMVGMGAAEANRRNFLALARLSGDFYDRLRGRETLRLFHRAAAEQQAVAASTTDFRQRTMEVLRLAFLSSAVLEF					VNIRRRNRLYVVVAVLVGLGLATSLVMYALRSNIDLFYTPSEILYGKGEDH-QKPEAGQRLRVGGMVMPGSVKRDPKTLAVSFKLYDANGVVSVSYEGILPDLFREGQGVVAQGVLEDGNLVNAKEVLAKHDEKYTPPEIQDAMKKNHNGPAAAYQQA--GTQSMSAYKSKVKKAVIPVAGLGTRMLPATKAIPKEMLPLVDKPLIQYVVNECIAAGINEIVLVTHSSKNSIENHFDTSFELEAMLEKRVKRQLLDEIQSICPPHVTIMQVRQGIAKGLGHAVMCAHPLVGDEPVAVILPDVIIDEYESNPTKDNLAEMLTRFEESGRSQIMVEPVADVTAYGVVDCQGAELAPGQSAPMVGVVEKPKASEAPSNLAVVGRYVLSADIWPLLAKTPPGA…					--------------------------------MFFLYPLFAVLIWSINSIVSKLSATAIDPAAISFYRWLLALLVLTPFVLPGIWRTRQAIRPHLWRLLILGLLGMVLYQSLAYYAAQSVSALFMGIIGALIPLLTVLLSVVILRIAPTLGILLGSIISFIGLVWLVSQGNVMQLLHQGLGKGELLMLAASAAYALYGVLTRRWALP---LPIWHSLYVQILFGVVLLLPGFLLAPEVALNRQNLPLVAFAGLFA					MQKVVLATGNPGKVRELADLLSAFGLDIVAQTELGVESAEETGLTFIENALLKARHAAQITGLPAIADDSGLAVDALGGAPGIYSARYAGEEASDQQNLEKLLQALENVPDGQRQAQFHCVLVYLRHADDPTPLVFHGSWQGEITRAAAGAGGFGYDPIFYVPALGKTAAELSKAEKGEVSHRGKALTLLLEAMRNA--------------------------------------------MMQMLLLPLLQQLSQQSRWQLWLTPAHKLNRAWLQQSGLPLDKSMHIADSERMNAVEAMIKALRTGNYSVVLAWIPYELDEDERRQLENAAAEGDALGLILRSSGTPEAPLGPQNALKIQSDLFHMNKVLLYCRPGFEKECAAEISAKAAEREVYGFP…					MGKGSSDFIPLNVAVMTVSDRHSADSDSSGSYLREALAGAGHQVLDHAIVPDNRYRIRAVVSSWIASKDVQVVLINGGTGFNEKNATPEALRPLFDREVEGFGELFRMISWEDIATATLQSRALAGIANGTLIFAVPGSTAACQLAWERIIQHQLDARTRPCHFVSHLKKT---VGKTVKKQRPVNLDLSTIRFPLTAIASILHRVSGVITFVSIGILLWLLGLSLSSPEGFLQASAVMDSFIVKFIMWGILTALAYHIAGGIRHMMMDFGLLGETLETGKLSAQIAFGITVALSILAGVLVWMESLVTLYQEHIKTLQQRAQQVLARHNLDAMLIHSGELLTVFLDDHTYPFKVNPQFKAWVPVTQVPNCWLWIDGVSKPKLWFYSPVDYWHDVEPLP…					MKIFSVLAVVISALLLQGCAAVVIGSAAVATKTATDPRTVGTQVDDGTLELRVANALATDKQVKA-AHINATAYQGKVLLTGEAPDQSVADKAKQITAGVEGATEVYNEIRIGPNASLGTSSSDTWITTKVRSQLLASDKVKSSNVKVTTEQGEVFLLGLVTAQEGQAAAEIASKISGVKHVTTAFTLLKMSKKLWGALVIALIASWLGIK-P---ALHGSSPVGPTTRTHNSA--------QGGVSD------ITAETAPQKVAAWIHQYHRLPDYYIRKGEARHDGWDPSDANLCDVLPGKAIGGDHFSNREGRLPDAAGRRWYEADVNYRCGHRNADRLLYSSDGLVFLTTDHYRTFTRIPMIRKRHKRVLPGFGLSLGTSLFFTCLILLLPISAL…					------------------------------------------------MANNIRIEEDLLGMREVPADAYYGVHTLRAIENFYISNSKISDIPEFVRGMVMVKKAAALANKELQTIPRNIANTIIQACDEVLNNGKCMDQFPVDVYQGGAGTSVNMNTNEVLANIGLELMGHHKGEYQYLNPNDHVNKCQSTNDAYPTGFRIAVYTSILKLIDAINQLGEGFQRKAVEFENILKMGRTQLQDAVPMTLGQEFHAF					-MNTRQRLSVVMITKNEAELIPECLASVDWADEIVVLDSGSTDQTCEIARQAGAKVFRNTQWPGFGPQRQQAQQYASGDMILMIDADERVTPELRQSIETLLSQPPQAHQVYSIARSNWFLGRYMRHSGWYPDRVTRLYPASFTYNSHLVHESLEHPGAAVIRLSGDLQHLTCRDLHHFQQKQLAYANAWAQQRARQGRRCGLFSVYSHSVAAWLKTAILRAGFLDGRQGWILALVNAQYTFNKYAILWALT---					MTTQAP-GSMLPLSPEQLARLQAATTDYSPTQLAWLSGYFWGRV-----EQTPGSAVASTASAPAPAEAPAITLLSASQTGNARRLAEQLRDDLLAAKLNVNLVNAGDYKFKQIGQEKMLVVVTSTQGEGEPPEEAVALHKFLMSKKAPKM-EGAAFAVFGLGDTSYEFFSQAGKDFDSRLAELGGERLLDRVDADVEYAEQAAAWRNALTEILKKSVPTESPAQAAATAAGSVNEVTTSPYTKESPLSASLAVNQKITGRDSDKDVRHIEIDLGDSGLRYQPGDALGVWYENDAALVSELLELVWLKGDEPVEVQGKTLPLAEALQKHFELTVNTAQIVAQYAQLSRNAELLSLVDDKARLQHYAQHYPIVDMVRLAPSELSAEQLTGLLRPLTPRLY…					MSSIRLADLAQQLDAELHGDGDIAISGIASMQSATTGQITFLANSRYREQLAQVQASAVVLTEADLEWCNTAALVVKNPYLTYARMAQLLDTTPQPAQNIAPSAVIDPTAKLGNNVSVGANAVIESGVELGDDVVIGAGCFVGKQTRIGRGSRLWANVTIYHEIQIGQDCLIQSGTVIGADGFGYANDRGNWVKIPQLGTVVIGDRVEIGACTTIDRGALDNTLIGNGVIIDNQCQIAHNVVIGDNTAVAGGVIMAGSLKIGRYCMIGGASVINGHMEICDKVTVTGMGMVMRPITEPGVYSSGIPLQPNKTWRKTAALVMNIDDMSKRLKAIERKVGKDE-MKEKNSEGVRLDKWLWAARFYKTRAIAREMIEGGKVHYNGQRSKPSKLVELEAELTL…
>P_septica					>T_sp_NML_06					>T_ptyseos					>P_rwandensis					>P_eucrina					>T_morbirosei					>P_dispersa					>P_s_indologenes					>P_s_stewartii					>P_rodasii
MNKTRQQELTRWLRQQRAYGGRWLRLTSLFGLASALVIIAQAWLLAFLLQALIVEQRPRADLLLSFALLLLCFALRAVLNYAREAAGFRAGQAIRQALRQQVLDRLSALGPAWIRGKPAGSWATLLLEQIEEMQDYYARYLPQMTLAALIPLCILLTVFPLNWAAGLILLVTAPLIPLFMALVGMGAADANRRNFTALARLSGDFLDRLRGRETLRLFHRAEAETAAIAASTADFRQRTMEVLRLAFLSSAVLEFFASLAIAVVAVYFGFSYLGELHFGTWGSGVTLFAGFVALILAPEFFQPLRDLGAFYHAKAQAVGGADALERFMRESPQPAAAEGAATLPDDAPLAVVAQDLIALSPEGKTLCGPLSFTLAGGERVALVGQSGAGKTVLMNVLLG…					MNIRRRRRLMVVVAILVGLGLATGLVMYALRSNIDLFYTPSEILYGRGAQHTDIPHVGQQLRVGGVVMPGSVQRDPNTLAVRFKLYDANGVVEVSYVGILPDLFREGQGIVAQGVLEDGHLIKAQQVLAKHDAKYTPPEIEDAMKKNPNDPVANGVPV-QGGQQMSAHKSNIKKAVIPVAGLGTRMLPATKAIPKEMLPLVDKPLIQYVVNECIAAGINEIILVTHSSKNSIENHFDTSFELEAMLEKRVKRQLLDEIQGICPPHVTIMQVRQGVAKGLGHAVMCAHPLVGDEPFAVILPDVIIDEYDANPNQDNLAEMLKRFDETGNSQIMVEPVADVTAYGVVDCQGAELKAGDSAPMVGVVEKPKAAEAPSNLAVVGRYVLSQDIWPLLAKTPPGA…					--------------------------------MNFLFPLGAVLIWAINSVVSKLTVGLITPEAISFYRWSIALLVLSPFVLPGVIRNRHALWRNRWRLLILGALGMVLYQSLAYFAARTVSALFIGIMVASIPLMTVIFSLFILRLAPTVGIVIGTVLSFVGLSWLISAGHPLQLLHQGLGSGELMMVIAAAAYALYGVLTKRWAMA---LPQWQSLYVQIIFAIILLLPGFLLTPDIALTPKNIPLVLYAAIPA					MQKVVLATGNPGKVRELADLLAAFGLDIVAQTELGVESAEETGLTFIENAILKARHAAQITGLPAIADDSGLAVDALGGAPGIYSARYAGLDASDQQNLDKLLVALENVPDGQRQAQFHCVLVYVRHAEDPVPLVFHGSWEGEITRAAAGQGGFGYDPIFYVPELGKTAGELSKDEKRAVSHRGKALTLLLEAMRNAMRTQFSGFADRTSSFANGGL-----TQPALGGITELRYSEQ-PGIMQMLLLPVLKQLSEQSRWQLWLTPAHKLNRSWMQQSGLPLEKSMHITESERLSTVESMVKALRTGNYSVVLAWIPYELNDEERLELELAASEGEALGLIMRPQGHERVLPRQSNPSKIPSDLFHMNKVLLYCRPGFEKECAAEISAKAAEREIYGFP…					MAKPTGEFTALTAAVLTISDSRDAANDTSGDYLREALADAGHQVVDHAILPDNRYRIRATVSRWIASDDIQVVIVNGGTGFNSKNSTPEALLPLFDREIDGFGELFRMFSYEDIGSATLQSRAVAGLANQTLIFALPGSTSACRCGWERIIADQLDARTRPCNFVSHLKKVTV-----------------------------------VITFVALGILLWLLGLSLSSPEGFQQAASIMDSFFAKFIMWGILTALAYHAASGIRHMLADFGFTAETLQVGTRTAQAVFVITVVLSILAGVLVWMDSLKTLYQAHIKTLQQRAQQILARGKLDALLIHSGELQTVFLDDHTYPFKVNPQFKAWVPVTQVPNCWLWVDGSNKPKLWFYSPVDYWHNVEPLP…					MKQFSVLAILISALMLQGCAAVVIGSAAVATKSATDPRTVGTQVDDGTLELRVANALATDKQIKAETHINATAYQGKVLLTGEAPSQELADRAKQITAGVDGATDVYNEIRIGPNATLGTSSSDTWITTKVRSQLLASDKVKSSNVKVTTEQGEVFLLGLVTAQEGQAAAEIASRVSGVKHVTTAFTMLKMSKKLWGALIIALIASWLGIK-PSLTGSHYSNGHSTGYSSSAPP--------RSSGTN-QSTADITELTSADQVAAWIHQHHRLPDFYLTKGEARREGWNPSRANLCDVLPGKAIGGDHFSNREGRLPDASGRRWFEADVNYQCGHRNADRLLYSSDGLVFLTTDHYRTFKRIPMKSVRHKRVLPGFGLSLGTSLFFTCLVLLLPMSAL…					------------------------------------------------MANNIRIEEDLLGMREVPADAYYGVHTLRAIENFYISNSKISDIPEFVRGMVMVKKAAALANKELQTIPRHIANTIIQACDEVLNNGKCMDQFPVDVYQGGAGTSVNMNTNEVLANIGLELMGHQKGEYQYLNPNDHVNKCQSTNDAYPTGFRIAVYASILKLLDAIGQLSEGFQRKAVEFENILKMGRTQLQDAVPMSLGQEFHAF					MTATRQRLSVVMIAKNEAALLPDCLASVSWADEIIVLDSGSTDDTLSLAQQAGAQVFQATEWQGYGKQRQRAQSFASGDMILMIDADERVTPELRQAIEQVLEAP-PGPTVYSLSRSNLFLGRFMRHSGWYPDRVMRLYPRTLGYNDNQVHESLKTEGAPVKVLKGDLQHLTCRDLMVFQRKQLAYAEAWAQERFKRGKTCSLFSVFSHTAGAFVKTLLLRAGFLDGKQGWLLAVVNAQYTFNKYAALWALN---KTSAEGRT--MENQPKLNSSKEVISFLAERFPHCFSAEGEARPLKIGIFQDLVERVQGEMNLSKTQLRSALRLYTSSWRYLYGIKAGATRVDLDGNPCGVLDEQHVEHARKQLEDAKARVQAQRDQQRAARREAGEGEEGASAP…					MTTQAP-GSLLPLSPEQLARLEAATTDFSTTQMAWLSGYFWGKV-----NHAPGQAVAS---APAQPEAPAITLLSASQTGNARRVAEQLRDDLQAAKLTVNLVNAGDYKFKQIGQEKLLIVVTSTQGEGEPPEEAVALHKFLMSKKAPKM-DGAAFAVLGLGDTSYEFFSKAGKDFDTRLAELGAERLLDRVDADVDYAEQASAWRKALTDILKARVPTASPAQAAATVAGSVNEVSTSPYSKTQPLSASLSVNQKITGRDSDKDVRHIEIDLGDSGLRYQPGDALGVWYENDAALVSELLELVWLKGDEPVDVQGQTLPLAEALQKHFELTVNTAQIVAQYATLSRNDELLSLVDDKAKLQQYAQRYPIVDMVRLAPAQLTAEQLTGLLRPLTPRLY…					MSSIRLADLAQQLDAELHGDGDIVISGIASMQSATTGQITFLANSRYREQLALIQASAVVLTEADLEWCKTAALVVKNPYLTYARMAQLLDTTPQPAQNIAPSAVIDPTATLGKNVSVGANAVIESGVELGDDVVIGAGCFVGKRTRIGRGSRLWANVTIYHEIEMGQDCLIQSGTVIGADGFGYANDRGNWVKIPQLGTVVIGDRVEIGACTTIDRGALDNTLIGNGVIIDNQCQIAHNVVIGDNTAVAGGVIMAGSLKIGRYCMIGGASVINGHMEICDKVTVTGMGMVMRPITEPGVYSSGIPLQPNKTWRKTAALVMNIDEISKRLKAIERKVGKDD-MKEKISEGVRLDKWLWAARFYKTRALAREMVEGGKVHYNGQRSKPSKIVELHAELSL…
>P_sp_A4					>P_eucrina					>P_rwandensis					>T_sp_NML_06					>P_s_indologenes					>P_brenneri					>P_agglomerans					>T_sp_NML_06					>E_pyrifoliae					>T_ptyseos
MNKTRQQELLRWLRLQRRHGGHWLHLTSCLGVVSALLIVWQAWLIASLLQYLIIDKVPRTALGPAFLWLLACFVLRALIQYLRDLAGFRAGLAIRRKLRQQVLDRLASLGPAWIKGKPAGSWATLLLEQIEEMQDYYARYLPQLSLAALIPCIILITLFPLNWAAGLILLVSAPLIPFFMALVGMGAAEANRRNFQALARLSGDFLDRLRGRDTLQLFHRTTAEQQAIANASEDFRKRTMEVLRLAFLSSAVLEFFASLAIAVVAVYFGFSYLGELNFGHYGTGVTLFSGFLALILAPEFFQPLRDLGTFYHAKAQAVGGADALQTFMVEAPEPAIPTCDPAVLPQAPFQLDAKDLVVTTIHGKALTSALSFTLSPGERVLLIGASGAGKSALMNVLLG…					MNLRRRNRLLVVLAILTGLGLATALVMYALRSNIDLFYTPGEIINGKGDAQ-LKPEAGQRLRVGGMVMPGSVRRDPQSLAVTFSLYDARGVVSVSYNGILPDLFREGQGVVAQGVLQAGNVISAREVLAKHDEKYTPPEIQDAMNTNHTRAAVRYQPA--GNQPMSAYKSKVKKAVIPVAGLGTRMLPATKAIPKEMLPLVDKPLIQYVVNECIAAGINEIVLVTHSSKNSIENHFDTSFELEAMLEKRVKRQLLDEIQSICPPHVTIMQVRQGIAKGLGHAVMCAHPLVGDEPVAVILPDVIIDEYESNPTKDNLAEMLARFEETGHSQIMVEPVADVTAYGVVDCKGAELSAGQSAPMVGVVEKPKANEAPSNLAVVGRYVLSADIWPLLAKTPPGA…					--------------------------------MYLLFPLIAVMIWSINTIVSKLSAGSIDPAAISFYRWLLALVMLAPFCLPGVWRHRHTIRANLWRLLILGLLGMVLYQSLAYYAAHSVSAVMMGILGATIPLLTILLSLFVLRLAPTRGILIGGLLSFAGLVWLVSEGNPAQLLNQRLGNGELMMLAASTSYALYGVLTKRWAIP---LPTWQSLYVQIFFGVLLLLPGFLRAPDVSLNMHNIPLVLFAGLFA					MQKVVLATGNAGKVRELAEPLAEFGLEIVAQTDLGVEGPEETGLTFIENALLKARHAARETGLPAIADDSGLAVESLGGAPGIYSARYAGTEASDQQNVEKLLEALQDVADAQRQAAFHCVLVYLRHADDPTPLVFHGRWPGMITRQPVGEGGFGYDPVFFVPQQGKTAAEMTKPEKLAVSHRGQALALLLDALRDG------------------S------VSQTSGCISELNYDAHNPSLLTMLLFPLLKQLAEQSRWQLWLTPEHKLNRLWLQQSGLPLEKSMQVTSLSSSDTLQSMTKALRSGNYSVVMIWISKSLTDNERDELEQAASEGRSLGLIMRENTGFRVGTGQENRLKIHLPLLHMNKVLLYCRTGFEKECAAEITARATALEVFGFA…					MGKSASTFQPLQLAMLTVSDSRDASSDTSGDYLREAAAEAGHSVIDHAIVPDNVYRIRAIVSRWIASEDVQVVIINGGTGFNAKNSTPEALLPLFDREIDGFGELFRMVSYEDIGGSTLQSRAVAGLANQTLIFAVPGSTSACTTAWERIIADQLDARTRPCNFVTHLKKL---VGKTVKKQRPVNLDLSTIRFPVTAISSILHRVSGVITLVALGILLWLLGLSLSSPEGFQHAASIMSGFFVKFIMWGILTALAYHTVGGIRHMLMDFGYLAETLEAGKRSAQVTFGITVVLSILAGVLVWMDSLKSLYHAHITTLQQRAQQVLARHKLDAMLIHSGELLTVFLDDHTYPFKVNPQFKSWVPVTQVPNCWLWIDGVNKPKLWFYSPVDYWHNVEPLP…					-------------------------------------------------------------------------------------------------MGVDGATEVYNEIRIGQKVTLGTSSSDTWITTKIRSQLLGSDQVKSSNVKVTTENGEVFLLGLVTPQEAQAAADVASRVSGVKHVTTAFTMLKMSKKLWIGLFLVLAAAFYGLK-P--------------YLNSSVA--------PAQA-D------I					------------------------------------------------MANNIRIEEDLLGMREVPADAYYGVHTLRAIENFYISNSKISDIPEFVRGMVMVKKAAAMANKELQTIPRNIADTIIKACDEVLNNGRCMDQFPVDVYQGGAGTSVNMNTNEVLANIGLELMGHQKGEYQYLNPNDHVNKCQSTNDAYPTGFRIAVYSSLLKLLDGISQLAEGFQHKADEFQTILKMGRTQLQDAVPMTLGQEFHAF					-MTTRQRLSVVMITKNEAELLPDCLASVLWADEIVVLDAGSDDATCEIARHAGAKVYQNDEWPGFGPQRQRAQHYASGDLILMIDADERVTPALRHAIETLLSKPINNNCVYSIARSNWFLGRFMRHSGWYPDRVTRLYPARFTYNSHRVHESLEHPGAEVIKLAGDLQHLTCRDLHHFQQKQLSYAHAWAQQRFEQGRRCGLFSIYSHTVGAWLKTAILRAGFLDGRQGWVLAQVNAQYTFNKYALLWALN---					MTTQAP-LNMLPLNPDQLARLQAATGDYSPMQLAWLSGYFWGMV-----NPASGAVAAA---APAAAEVPAVTILSASQTGNARRLAEQLRDDLLGAKLNVSLVNAGDYKFKQIGQEKLLVVVTSTQGEGEPPEEAVALHKFLMSKKAPKM-NASAFAVFGLGDTSYEFFSKAGKDFDSRLAELGAERLLERVDADVEYAAEAQAWRLQLTDILKARVPQAGSSQMTAAAAGSINAISSSPYSKEAPLSASLAVNQKITGRHSVKDVRHIEIDLGDSGLRYQPGDALGVWFENDAALVQELLQLLWLKGDEPVTVDGRSVPLAQALQKHYELTVNTPQIVEQYARLSRNEALLAQIGDKSALQHYAQNTPIVDMARYAPTELNAEQLTGLLRPLTPRLY…					MSSIRLADLAQQLDAELHGDGDIAISGIASMQSATSGKITFLANSRYREQLAHCKADAVVLTEADLEWCQSAALVVKDPYLTYARMAQLLDTTPSPAENIGPGAVVSPQARLGANVAIGANAVIESGAELGDNVVIGAGCFVGKKTRIGAGTRLWANVSVYHEVVIGENCLVQSGTVIGADGFGYANDRGNWVKIPQLGSVVIGDRVEIGACTTIDRGALDNTQIGNGVIIDNQCQIAHNVIIGDNTAVAGGVIMAGSLKIGRYCMIGGASVINGHMEICDKVTVTGMGMVMRPITEPGVYSSGIPLQANKAWRKTAALVMNIDDMNKRLKAIERKTGKDNMKKQTSPQDVRLDKWLWAARFYKTRAIAREMIEGGKVHYNGQRTKPGKHVELNAGLVL…
>E_billingiae					>E_billingiae					>P_rodasii					>T_morbirosei					>P_sp_At-9b					>E_pyrifoliae					>P_ananatis					>P_brenneri					>P_septica					>P_sp_GM01
MNKTRQQQLLRWLKSQTGLGKRWLRLSLMLGMLSALLIVCQAWLLASLLQALIVDHTPREALVTPFVLLFGCFVLRGVLAWLREKVGFECGRAIRTTLRRTVLNQLSALGPAWIQGKPAGSWATLLLEQIEDMQDYYSRYLPQMLLSVFIPCFILIALFPVNWAAALILLCTAPLIPLFMALVGMGAADANRRNFQALARLSGHFLDRLRGLETLRLFHRAEAETESIRQSSEDFRQRTMEVLRLAFLSSAVLEFFASLSIAVVAVYFGFSYLGELNFGHYGSGVTLFAGFLALILAPEFFQPLRDLGAFYHAKAQAVGAADALETFLNQSETLTSLQGEKVIDTQHGLTFEAQELQILSPDGKVLAGPLNFTLLPGMRVALVGQSGAGKTSLLNVLLG…					VNPRRKSRLIMVTAILVGLGLATSLVMYALRSNIDLFYTPGEIIDGKGEAH-AKPEPGQRLRVGGMVMPGSVKRDPQTLQVSFKLYDARGVISVSYLGILPDLFREGQGVVAQGVLQNGNLVEAKEVLAKHDEKYTPPEIEDAMKTNPKGPQSAYQPPVQGGQSMSAYKSKVKKAVIPVAGLGTRMLPATKAIPKEMLPLVDKPLIQYVVNECIAAGITEIVLVTHSSKNAIENHFDTSFELESMLEKRVKRQLLEEIQSICPPHVTIMQVRQGLAKGLGHAVMCAYPVVGDEPFAVILPDVIIDEYESNLATENLADMMRRFDETGRSQIMVEPVSDVTAYGVVDCQGAELSAGQSAPMVGVVEKPKADKAPSNLAVVGRYVLSADIWPLLAKTPPGA…					--------------------------------MNLLFPLIAVMIWSINTIVSKLSAGSIDPAAISFYRWLLALLVLAPFCLPGVWRHRHAIKANLWRLLILGLLGMVLYQSLAYYAAHSVSAVMMGILGATIPLLTILLSLFVLRLAPTRGILIGGLLSFAGLVWLVSEGNPTQLLNQRLGNGELMMLAASTSYALYGVLTKRWAIP---LPTWQSLYVQIFFGVLLLLPGFLRAPDVTLNLLNIPLVLFAGLFA					MQKVVLATGNPGKVRELAEPLADFGFDIVAQTDLGVDSVEETGLTFIENALIKARHAARVTGLPAIADDSGLAVDVLGGAPGIYSARYAGVEATDQQNLEKLLTAMQEIPDEKRQAAFHCVLVYLRHADDPTPLVFHGQWPGVIARESQGEGGFGYDPIFFLPELNITAAGMTKAEKLAISHRGQALKLLLDALRNGMRTQLLKSETFNIHRHSAP------SSEVCGCISELSYHAQHPALLNSLLLPLLKQLSEQSRWQLWLTPAHKLNRHWLQQSGLPLEKSMQVPSLTAEGGVRAMAKALRSGNFSVVLAWLPGHLTAAERAELEQAAKEGRTLGLIMREENDFNYPGRQENRLKIQSPLLHMNKVLLYCRSGFEKECAAEITARATELQVFGFA…					MSKPSGDFVALNVAVMTVSDSRDATNDTSGDYLREALSEAGHQVVDHAIVADNRYRIRATVSRWIASEDVQVVIINGGTGFNSKNSTPEALLPLFDREIEGFGELFRMISYEEIGSATLQSRAVAGMANQTLIFAVPGSGNACRSAWERIIADQLDARTRPCHFVSHLKKL---VGKTVKKQRPVNLDLSTIRFPVTAISSILHRVSGVITFVALGILLWLLGLSLSSPEGFLQAASIMDSFFAKFIMWGILTALAYHVVGGIRHMLADFGFMEETLQVGTRSAQAAFVITVVLSILAGVLVWMDSLKSLYHAHINTLQQRAQQVLARFKLDAMLIHSGELLTVFLDDHDYPFKVNPQFKAWVPVTQVPNCWLWIDGVNKPKLWFYSPVDYWHNVEPLP…					MKALSACAVILTALLLQGCVAAVVGSAAVATKTATDPRTVGTQVDDGTLELRVTNALSKDAQIKQTAHIVATAYQGKVLLTGQAPGSELALRAKQIAVGVDGATEVYNEIRTGNKVSFGTASSDTWITTKVRSQLLGSDRVKLSSVKVTTENSEVFLLGLVTNEEAKAAADIASRVSGVKHVTTAFTLLKMNKKPIIAAILVIIASYAGLRKP---GEQPAPANRP-QTQIGTA--------RSHSSN------ISVLTQQRRVADYLQQHHQLPGYYLGKAEARRQGWDPAKGNLCSVLPGKAIGGDRFSNREGGLPDRAGRRWFEADVNYQCGRRGTDRMLYSSDGLIFVTNDHYRHFERVNMLATRSKRVLPGFGISLGSSLFFTCLILLLPISAL…					------------------------------------------------MANNIRIEEDLLGMREVPADAYYGVHTLRAIENFYISNSKISDIPEFVRGMVMVKKAAAMANKELQTLPRDIANTIIQACDEVLNKGRCMDQFPVDVYQGGAGTSVNMNTNEVLANIGLELMGHQKGEYQYLNPNDHVNKCQSTNDAYPTGFRIAVYSSLLKLLDGISQLAEGFQRKADEFQTILKMGRTQLQDAVPMTLGQEFHAF					---------VVMIAKNEAELLPDCLASVSWADEIILLDSGSEDNSVEIATQAGAQVFRSDNWQGYGIQRQRAQRYASGDMILMIDADERVTPELRAAIEQVLIAP-PSRTVYSLGRSNLFLGRFMRHSGWYPDRVMRLYPPTLHYNDNLVHESLNAEDAPVVALKGDLQHLTCRDLIAFQRKQLAYAEAWATERYQRGKRCGLFSIFSHTLGAFVKTLLLRAGFLDGKQGWILAVVNAQYTFNKYSALWALN---					------------------------------------------MI-----NQTPGSVAASA--PAAAAEIPAITLISASQTGNARRVAEQLRDDLQAAKLNVKLVNAGDYKFKQIGQEKLLVVVTSTQGEGDPPEEAVALHKFLMSKKAPAL-NGAAFAVLGLGDTSYEFFSKAGKDFDSRLAELGAERLLDRVDADVDFAEAAASWRRALVEVLKQRVPSETPAQAAATATGSVNEVHSSPYTKEAPLTASFAVN					MSSIRLADLAQQLDAELHGDGDIVISGIASMQSATTGQITFLANSRYREQLATIQASAVVLTEADLEWCKTAALVVKNPYLTYAHMAQLLDTTPQPAQNIAPSAVIDATAKLGKNVSVGANAVIESGVELGDDVVIGAGCFVGKQTRIGRGSRLWANVTIYHEIQIGQDCLIQSGTVIGADGFGYANDRGNWVKIPQLGTVVIGDRVEIGACTTIDRGALDNTLIGNGVIIDNQCQIAHNVIIGDNTAVAGGVIMAGSLKIGRYCMIGGASVINGHMEICDKVTVTGMGMVMRPITEPGVYSSGIPLQPNKTWRKTAALVMNIDEISKRLKAIERKVGKDD-MKEKISEGVRLDKWLWAARFYKTRALAREMVEGGKVHYNGQRSKPSKLVELNAELTL…
>E_pyrifoliae					>T_ptyseos					>P_ananatis					>P_s_indologenes					>P_dispersa					>P_rwandensis					>P_eucrina					>P_sp_A4					>P_sp_GM01					>P_sp_aB
MNKTRQHILTRWLKSQSVHGQRWLRLSFLSGILSTLLILAQAWLLAALLQALMVDQQPRNALLVHFSLLLACFAGRALLAWLREKAGCQAGQAIRQALRQQVLNRLAHLGPAWIQGKPAGSWATLLMEQIEDMQDYYGRYLPQMMLAGAIPLLVLLVLFPVNWAASLILLATAPLIPLFMAMVGMGAADANRRNFLALSRLSGQFLDRLRGLDTLRLFHRATAETATIATASEQFRQRTMEVLRMAFLSSAVLEFFASISIALIAVYFGFSYLGIFDFGHYSGPVTLFAGFLVLTLAPEFYQPLRDLGTFYHAKAQAVGAADALVSFLDASEAAATERGDLTPQFDKGVNLVATGLTIVSADGQQLAGPLDFTLRPGQRIALVGQSGAGKTSLMNLLLG…					VNIRRRRRLMVVVAILVGLGLATALVMYALRSNIDLFYTPSEILYGRGADHADKPHPGQQLRIGGIVMPGSVKRDPDTLAVQFKLYDANGVVGVTYVGILPDLFREGQGIVAEGILEDGNVIKARQVLAKHDAKYTPPEITNAMKKNPDDPALNMQTM-QGEQQMSAYKSKVKKAVIPVAGLGTRMLPATKAIPKEMLPLVDKPLIQYVVNECIAAGINEIILVTHSSKNSIENHFDTSFELEAMLEKRVKRQLLDEIQSICPPHVTIMQVRQGVAKGLGHAVMCAHPLVGDEPFAVILPDVIIDEYESNPQQDNLAEMLRRFDETGSSQIMVEPVADVTAYGVVDCKGAELQPGDSAPMVGVVEKPKATEAPSNLAVVGRYVLSADIWPLLAKTPPGA…					--------------------------------MFFLFPLFAVLIWSVNAIVNKLSASAIEPAAISFYRWLLALLVLTPFVLPGVIRQWQTIRPHLMRLMVLGLLGMALYQSLAYYAAHSVSALFMGIIAALIPLLTVLLSVVILRIAPTVGILAGSLISFCGLIWLVSAGNLDQLLHHGIGAGEAMMLAASASYALYGVMTKRWSIP---LPVWQSLYVQIAFGVLLLLPGFLMTPDVALTPHNLPLVAFAGLFA					MQKVVLATGNPGKVRELADLLSAFGLDIVAQTDLGVESAEETGLTFIENAILKARHAAQVTGLPAIADDSGLAVNALGGAPGIYSARYAGDDASDQQNLEKLLQALESTPDGQRQAQFHCVLVYLGHAADPTPLVFHGAWDGEITRTPAGEGGFGYDPVFYIPALGKTAAELTKAEKGKVSHRGKALTLLLEAMRNAMRTQHPRNVCPTHRYASPSD-----PASQSGWITELRYSEK-PGMMQMLLLPLLQQLSQQSRWQLWLTPAHKLSRVWMQEAGLPLEKSMHIADAERYNAVEAMIKALRTGNYSVVLAWIPYDLDEDERRELELAAAEGEALGLILRSGESPKTPVRPESRLKIQSDLFHMNKVLLYCRAGFEKECAAEISAKAAERNVYGFP…					MGKPSGDFVALNAAVMTVSDSRDASSDSSGDYLREALTEAGHQVVDHAIVPDNRYRIRATLSRWIASEDVQVVLINGGTGFNSKNSTPEALLPLLDREIDGFGELFRMISYEEIGSATLQSRAVAGLANQTLLFAVPGSTGACRSAWERIIEAQLDARTRPCNFVSHLKKL---VGKTVKKQRPVNLDLSTIRFPVTAISSILHRVSGVITFVALGILLWLLGLSLSSPEGFQQAASIMDSFFAKFIMWGILTALAYHAASGIRHMLADFGFTAETLQVGTRTAQAVFVITVVLSILAGVLVWMDSLKTLYHAHISTLQQRAQQVLARFKLDAMLIHSGELLTVFLDDHDYPFKVNPQFKAWVPVTQVPNCWLWIDGVNKPKLWFYSPVDYWHNVEPLP…					MKALNAVAILLTAMLLQGCVAVVAGGAAVATKTATDPRTVGTQVDDGTLELRVTNALAKDDQIKNQARVVVTAYQGKVLLTGQSPSPDLASRAKQIAMGVDGATEVYNEIRNGQKVSLGTSSSDTWITTKIRSQLLGSDQVKSSNVKVTTENGEVFLLGMVTQQEAAAAADLASRVSGVKHVTTAFTILKMSKKLWIGLLFALVAVWAGLK-P--------------HLSHKTA--------AGHS-D------IAQRTEANTVARWLQQHHQLPDLYLTKSEARRQGWNPSKGDLCDVLPGRAIGGDRFSNREQRLPMQAGRKWFEADVNYDCGHRDADRLLYSSDGLIFITTDHYRSFKQVNMFALAQKRVLPGFGLSLGTSLLFTCLILLLPISAL…					------------------------------------------------MANNIRIEEDLLGMREVPADAYYGVHTLRAIENFYISSSKISDIPEFVRGMVMVKKAAALANKELQTIPRNIANTIIQACDEVLNNGKCMDQFPVDVYQGGAGTSVNMNTNEVLANIGLELMGHQKGEYQYLNPNDHVNKCQSTNDAYPTGFRIAVYASILKLLDAIAQLSEGFQRKAVEFENILKMGRTQLQDAVPMSLGQEFHAF					-MTSRQRLSVVIISKNEADLLPDCLASVSWADEIVVLDSGSEDNTVEVARQAGALVWQSTHWQGFGKQRQLAQSYASNDMILMIDADERVTPPLRQAIEQVLSSP-VSNTVYSLGRSNLFLGRFMRHSGWYPDRVMRLYPRQLSYNDNLVHESLETQGAPVVALKGDLQHLTCRDLVAFQRKQLNYAAAWAQERHQRGKRCGIVSIFTHTLGAFCKTLILRAGFLDGKQGWILAVVNAQYTFNKYSTLWALN---					MTTQAP-GSLLPLSPEQLARLQAATTDFNTTQMAWLSGYFWGMV-----NQTPGAAAAP---APVQAETPTITLISASQTGNARRLAEQLRDDLLAAKLSVNLVNAGDYKFKQIGQEKLLVVVTSTQGEGEPPEEAVALHKFLLSKKAPKF-TGTAFAVFGLGDTSYEFFSKAGKDFDERLAELGAERLLDRVDADVEYKEQATAWRQQITEILKARVPSESPAQAAITAAGSVNLVDSSPYTKEEPLLASFAANQKITGRDSDKDVRHIEIDLGDSGLRYQPGDALGVWFENDAELVQELLQLVWLKGDEQVEVQGKTLALTEALQKHFELTVNTPQIVEQYAALSRNDTLLALAGDKPKLQSYAQSFPIVDMVRQAPTELNPEQLTSLLRPLTPRLY…					MSSIRLADLAQQLDAELHGDGDIVISGIASMQSATTGQITFLANSRYREQLALIKASAVVLTEADLEWCNTAALVVKNPYLTYARMAQILDTTPQPAQNIAPSAVIDPSARLGNNVAIGANAVIEADVELGDNVVIGAGCFVGKKTRIGSGTRLWANVSVYHEIEIGQDCLIQSGTVIGSDGFGYANDRGNWVKIPQLGAVIIGDRVEIGACTTIDRGALDNTLIGNGVIIDNQCQIAHNVVIGDNTAVAGGVIMAGSLKIGRYCMIGGASVINGHMEICDKVTVTGMGMVMRPITEPGVYSSGIPLQPNKTWRKTAALVMNIDDMSKRLKAIERKVGKDD-MKEKSSEEVRLDKWLWAARFYKTRAIAREMIEGGKVHYNGQRSKPGKVVELNAELTL…
>P_ananatis					>E_tasmaniensis					>P_brenneri					>P_agglomerans					>P_sp_GM01					>P_septica					>P_anthophila					>P_septica					>P_sp_A4					>P_septica
MNKSRQQHLTRWLRQQRHHAGPWLRLASLSGSASALLIILQAWLLASLLQALIVAHQSPPSLLSQFMLLLLCFVLRAMLNYAREQAGFRAGQAIRQALRKQILDRLSALGPAWIQGKPAGSWATLLLEQTEDMQAYYARYLPQMTLATVIPCAILIALFPLNWAAGLILLATAPLIPLFMALVGMGAADANRRNFLALARLSGDFLDRLRGRETLRLFHRAEAEKQAIAATTTDFRQRTMDVLRLAFLSSSVLEFFASLAIAVVAVYFGFSYLGELHFGDYGKGVTLFAGFLVLILAPEFFQPLRDLGTFYHAKAQAIGGADAIERFMQATPQSEARNGTIPFAAAAPLGLVADNLMVCAPGGKILCGPLHFTLRSGGRIALVGKSGAGKTALLNALLG…					VNPRRKNRLILVMLVLVGLGLATALVMYALRSNIDLFYTPSEMVNGKGEQQ-LKPEPGQRLRVGGMVMPGSVKRDPNTLRVAFKLYDASGVISVSYDGILPDLFREGQGVVAQGVLQDATHVIAKEVLAKHDEKYTPPEIEDAMKKDHPAQAVGDNSV---RPSMSAYNSKVKKAVIPVAGLGTRMLPATKAIPKEMLPLVDKPLIQYVVNECIAAGINEIVLVTHSSKNSIENHFDTSFELEAMLEKRVKRQLLEEIQSICPPHVTIMQVRQGLAKGLGHAVMCAWPVIGNEPVAVILPDVILDEYESDLSKDNLAEMIKRFDETGHSQIMVEPVADVTAYGVVDCQGAQLNPGESAPMVGVVEKPKADQAPSNLAVVGRYVLSADIWPLLAKTPPGA…					MSGERLILSDINYLDKSGQAYTAPHLMLWSVNMFFLYPLCAVLIWSINSIVSKLSASAIDPAAISFYRWLLALLVLTPFVLPGVWRTRQAIRPHLWRLLILGLLGMVLYQSLAYYAAQSVSALFMGIIGALIPLLTVLLSVVILRIAPTLGILLGSIISFIGLVWLVSQGDVMQLLSHGLGKGELLMLAASAAYALYGVLTRRWALP---LPIWHSLYVQILFGVLLLLPGFLLAPEVSLNRHNLPLVAFAGLFASIIAPFLWIHGVQRLGASTTSIFMNLIPVFTALIAVLFLHEQLHSYHWIGGGLTLSGVILAQRLRTPLTRAKPVNLRRL-----MQAQTMQRKVLRTICPDAKGLIAKITNICYKHELNIVQNNEFVDHRTGRFFMRTELEGIF…					MQKVVLATGNPGKVRELAELLSAFGLDIVAQTDLGVESAEETGLTFIENAILKARHAAQITGLPAIADDSGLAVDALGGAPGIYSARYAGEEASDQQNLEKLLQALENVPDGQRQAQFHCVLVYLRHAEDPTPLVFHGSWQGEITRAAAGAGGFGYDPIFFVPALGKTAAELSKAEKGAVSHRGKALTLLLEAMRNAMRTQHPNNSRYAHHYASSSV-----PASQGGGITELRYSEQ-PGMMQMLLLPLLQQLSQQSRWQLWLTPAYKLNRTWLQESGLPLDKSMHIADSERLNAVEAMVKALRTGNYSVVLAWIPYDLDEDERRQLENAAAEGEALGLILRASGTSEAPLRPQTAIKIQSDLFHMNKVLLYCRPGFEKECAAEISAKAAEREIYGFP…					MGKPSGEFVALNVAVMTVSDSRDASNDTSGDFLREALAEAGHQVVDRALVPDNRYRIRATVSRWIASDDVQVVIVNGGTGFNSKNSTPEALLPLFDREIEGFGELFRMISYEEIGSSTLQSRAVAGLANQTLIFAVPGSTNACRSGWERIIEDQLDARTRPCNFVSHLKKL---VGKTVKKQRPVNLDLSTIRFPVTAISSILHRVSGVITFVALGILLWLLGLSLSSPEGFQQAASIMDSFFAKFIMWGILTALAYHAVGGIRHMLADFGFMEETLQVGTRSAQAAFVITVVLSILAGVLVWMDSLKTLYHAHINTLQQRAQQVLARFKLDAMLIHSGELLTVFLDDHDYPFKVNPQFKAWVPVTQVPNCWLWIDGVNKPKLWFYSPVDYWHNVEPLP…					MKALNAVAILLTAMLLQGCVAVVAGGAAVATKTATDPRTVGTQVDDGTLELRVSNALAKDQQIKTDARIIATAYQGKVLLTGQAPSQDIASRAKQIAMGVDGATEVYNEIRIGQKVSLGTSSSDTWITTKIRSQLLGSDQVKSSNVKVTTENGEVFLLGLVTAEEAKAAADIASRVSGVKHVTTAFTMLKMSKKLWIALIVVLAAAWAGFK-P--------------HLNVSPT--------PESG-D------ISSLTDARTVARYLLQHQQLPTYYITKNDARRRGWDPAKGNLCEVLPGKAIGGDRFGNREKRLPQRSGRLWYEADVNYRCGHREADRLVYSSDGLVYITTDHYRSFKQVPMFALGQKRVLPGFGLSLGTSLLFTCLILLLPISAL…					------------------------------------------------MANNIRIEEDLLGMREVPADAYYGVHTLRAIENFYISNSKISDIPEFVRGMVMVKKAAAMANKELQTIPRNIADTIIQACDEVLNKGRCMDQFPVDVYQGGAGTSVNMNTNEVLANIGLELMGHQKGEYQYLNPNDHVNKCQSTNDAYPTGFRIAVYSSLLKLLDGISQLSEGFQRKADEFQTILKMGRTQLQDAVPMTLGQEFHAF					-MSARQRLSVVIIAKNEAALLPDCLASVSWADEIILLDAGSSDETAEIARQAGAKVYRAEAWVGFGKQRQRAQRYASGEMILMIDADERVTPTLRASIEAVLTQP-PAGTVYSLNRSNLFLGRFMRHSGWYPDRVMRLYPRALSYNDNLVHESLETQGAPVVRLQGDLQHLTCRDLIVFQQKQLAYAAAWAQERHQRGKRCGLFSIFSHTLGAFLKTLLLRAGFLDGKQGWILAVVNAQYTFNKYSALWALN---					MTTQAPSGSILPLTPDQLARLQTATTDFSPTQLAWLSGYFWGMV-----NNVPGAAVAA---APAQAEAPSVTLISASQTGNARRLAEQLRDDLLAAKLNVNLVNAGDYKFKQIGQEKLLVVVTSTQGEGEPPEEAVALHKFLMGKKAPQL-KDAAFAVFGLGDTSYEFFSQAGKDFDKRLEELGAARLLDRVDADVEYAQQATDWRSALVEILKQRVPAQSAASAAVTATGAVNEVFSSPYTKEAPLTAAFAVNQKITGRGSDKDVRHIEIDLGDSGLRYQPGDALGVWYENDAELVSELLAQVWLKGDEQVEVQGNTLPLAEALQKHFELTVNTPQIVAQYATLSRNEALLALVDDKAALQNFAQNVPIIEMVRQAPIELNVEQLTGLLRPLTPRLY…					----------------------------------------------------------VVLTEADLEWCHTAALVVKNPYLTYARMAQLLDTTPQPAQNIAPSAVIDPSAKLGQNVSVGANAVIESDVVLGDNVVIGAGCFVGKKTRIGNNSRLWANVTVYHEIEIGQDCLIQSGTVIGADGFGYANDRGNWVKIPQLGAVIIGDRVEIGACTTIDRGALDNTLIGNGVIIDNQCQIAHNVVIGDNTAVAGGVIM
>P_anthophila					>P_vagans					>P_deleyi					>P_wallisii					>P_s_stewartii					>E_billingiae					>P_sp_A4					>P_rodasii					>P_sp_aB					>P_sp_A4
MDKSRQQHLTRWLRQQRHFGGRWLRLNTLLGTVSALLIIAQAGLLASLLQTLIIGQQPRETVTASLLLLLLCFVLRALINYARERTGYRAGQAIRQALRQQVLDRLAGLGPAWIQGKPAGSWATLLLEQIEEMQEYYARYLPQMTLAVLIPCCILLTIFPLNWTAGLILFATAPLIPLFMALVGMGAAEANRRNFLVLARLSGNFLDRLRGRETLRLFYRGAAEQQAVADATTDFRQRTMEVLRLAFLSSAVLEFFASLAIAVVAVYFGFSYLGELHFGDYGRGVTLFAGFLVLILAPEFFQPLRDLGAFYHAKAQAVGAADALETFMQATPAATPQQGQIPFTADRSLSLTADQLEVCAPDGQVLCGPLTFTIAAGEQIALVGQSGAGKTALMNALLG…					VNIRRRNRLYAAVAILLGLGLATALVMYALRSNIDLFYTPGEILYGKGEAH-EKPEAGQRLRVGGMVMPGSVRRDPNTLAVSFKLYDARGVVSVSFEGILPDLFREGQGVVAQGVLTTGNQVIAKEVLAKHDEKYTPPEIEDAMKSNHTGPQSLYQAG--NKSSMSANNTKVKKAVIPVAGLGTRMLPATKAIPKEMLPLVDKPLIQYVVNECIAAGINEIVLVTHSSKNAIENHFDTSFELESMLEKRVKRQLLDEIQSICPPHVTIMQVRQGIAKGLGHAVMCAHPLIGDEPFAVILPDVIIDEYESNPTKDNLAEMLSRYEESGRSQIMVEPVADVTAYGVVDCQGAELNPGDSAPMVGVVEKPKASESPSNLAVVGRYVLSSDIWPLLAKTPPGA…					--------------------------------MFFLYPLVAVVIWSINSIVSKLSASAIDPSAISFYRWLLALLVLTPFVLPGVWRTRQAIKPHLWRLAMLGLLGMALYQSLAYYAAHSVSALFMGIIGALIPLLTVLLSVVILRIAPTLGILLGSVISFTGLVWLVSEGNVTQLLSQGLGKGELMMLAASAAYALYGVLTRRWALP---LPIWHSLYVQIFFGVLLLLPGFLLAPTVALNLHNLPLVLFAGLFA					MQKVVLATGNPGKVRELADLLAAFGLDIVAQTELGVASAEETGLTFIENAILKARHAAQITGLPAIADDSGLAVDALGGAPGIYSARYAGVDASDQQNLDKLLLALENVPDGKRQAQFHCVLVYVRHAEDPVPLVFHGSWEGEITRAAAGAGGFGYDPIFYVPTLGKTAAELSKDEKRAVSHRGKALTLLLEAMRNAMRTHFSGPADRSRRFAASGL-----TQSSMGGITELRYSEQ-PGMMPLLLLPVLKQLSAQSRWQLWLTPACKLNRSWMQQSGLPLEKSMHITQSARFSTVESMVKALRTGNYSVVLAWIPYELTDSERLELEQAATEGEALGLIMRPQGHDRAFSRQSNAAKIPSDLFHMNKVLLYCRPGFEKECAAEISAKAAEREIYGFP…					MGKSASTFQPLQLAMLTVSDSRDASSDTSGDYLREAAAEAGHSVIDHAIVPDNVYRIRAIVSRWIASEDVQVVIINGGTGFNAKNSTPEALLPLFDREIDGFGELFRMVSYEDIGGSTLQSRAVAGLANQTLIFAVPGSTSACTTAWERIIADQLDARTRPCNFVTHLKKL---VGKTVKKQRPVNLDLSTIRFPVTAISSILHRVSGVITLVALGILLWLLGLSLSSPEGFQHAASIMSGFFVKFIMWGILTALAYHTVGGIRHMLMDFGYLAETLEAGKRSAQVTFGITVVLSILAGVLVWMDSLKSLYHAHITTLQQRAQQVLARHKLDAMLIHSGELLTVFLDDHTYPFKVNPQFKSWVPVTQVPNCWLWIDGVNKPKLWFYSPVDYWHNVEPLP…					MKVLPTLAVVLTALMLQGCVAAVIGSAAVATKSATDPRTVGTQVDDSTLELRVSNALGKDQQIKNDAHIVATAYQGKVLLTGQSPTADIASRAKQITMGVDGANEVYNEIRTGDKASFGTASSDTWITTKVRSQLLSSDQVKSSNVKVTTENGEVFLLGLVTDTEAKSAADIASRVSGVKHVTTAFTILKMNKKLIIAAILAIVATAAGLRHP---SKPPADRQQAAHTSTASA--------TNSSSD------ISTLTQQQRVADYLHQHQRLPAYYLTKGEARKQGWEPSRGNLCQSLPGRAIGGDRFSNREKVLPEKQGRHWFEADVNYDCGRRGSDRMLYSSDGLIYVTKDHYRNVEQVYMFATKSKRVLPGFGISLGSSLFFTCLILLLPISAL…					------------------------------------------------MANNIRIEEDLLGMREVPAEAYYGVHTLRAIENFYISNSKISDIPEFVRGMVMVKKAAALANKELKTIPRNIANTIIQACDEVLNHGKCMDQFPVDVYQGGAGTSVNMNTNEVLANIGLELMGHQKGEYQYLNPNDHVNKCQSTNDAYPTGFRIAVYASILKLIDAIGQLSEGFERKSKEFASILKMGRTQLQDAVPMTLGQEFHAF					-MPQRQRLSVVMIAKNEAELLPEALASVSWADEIVLLDSGSQDNTTEVARTQGAQVYPSEGWAGFGKQRQRAQAHASGDMILMLDADERVTPELRRAIENVLEQP-PSNTVYSLGRSNLFLGRFMRHSGWYPDRVMRLYPRALNYNDNLVHESLETQGAPVITLPGDLQHLTCRDLIAFQRKQMNYAEAWAQERFQRGKRCGLFSIFSHTLGAFLKTLLLRAGFLDGKQGWILAVVNAQYTFNKYSALWALH---					MTTQAP-GSMLPLSPEQLARLQAATTDYSPTQLAWLSGYFWGRV-----EQTPGSAVAGS--TPAPVDVPAITLLSASQTGNARRLAEQLRDDLLAAKLNVNLVNAGDYKFKQIGQEKMLVVVTSTQGEGEPPEEAVALHKFLMSKKAPKM-AGAAFAVFGLGDTSYEFFSQAGKDFDNRLAELGGERLLDRVDADVEYAEQASAWRSALTEILKKRVPTESPAQAAATAAGSVNEVTTSPYSKESPLSASLAVNQKITGRDSDKDVRHIEIDLGDSGLRYQPGDALGVWYENDAALVSELLELVWLKGDESVEVQGKTLPLAEALQKHFELTVNTAQIVAQYAQLSRNAELLSLVDDKARLQQYAQHYPIVDMVRLAPAELTAEQLTGLLRPLTPRLY…					MSSIRLAELAQQLDAELHGDGDIAISGIASMASAVTGQITFLSNSRYREQLAGCHASAVVLTEADLAWCHTAALVVKNPYLTYARMAQLLDTTPQPAQNIAPSAVIDPTAKLGNNVSIGANAVIESDVELGDNVVIGAGCFVGKKTRIGRGSRLWANVTVYHEIQIGQDCLIQSGTVIGADGFGYANDRGNWIKIPQLGAVIIGDRVEIGACTTIDRGALDNTLIGNGVIIDNQCQIAHNVVIGDNTAVAGGVIMAGSLKIGRYCMIGGASVINGHMEICDKVTVTGMGMVMRPITEPGVYSSGIPLQPNKTWRKTAALVMNIDEISKRLKAIERKVGKDD-MKEKNSEGVRLDKWLWAARFYKTRAIAREMIEGGKVHYNGQRSKPSKLVELNAELIL…
>P_eucrina					>P_sp_A4					>P_sp_aB					>E_tasmaniensis					>T_morbirosei					>T_sp_NML_06					>P_septica					>P_sp_GM01					>P_anthophila					>P_brenneri
MNKSRQKRLLGWLRQQRASGATALRLAALCGFASALVLIAQAWLMATLLQQLVVSDRPRSSLVTQFLLLLFCFLLRAGFNYGREMAGFRAGLAIRRALRRQLLDRIDALGPAWIQGRPAGSWSTLLLEQIEQLQEYYARYLPQMTLAVAIPCAILLAVFPVNWAAGLILLVTAPLIPLFMALVGMGAADASRRNFLALSRLSGDFYDRLRGRDTLRLFHRAAAEKQAIAASTDSFRQRTMDVLRLAFLSSAVLEFFASLAIAVVAVYFGFSYLGEFNFGHYGTGVTLFAGFLALILAPEFFQPLRDLGTFYHAKAQAAGAADALETFLQATPDARPQGPVRPWCDEAPLTLTAEDLVVMSPGGHALTQPLNFTLRAGCRVALVGESGAGKTVLMNALLG…					VNTRRRNRLTVIVALLVGLGIATSLVMYALRSNIDLFYTPSEILYGKGEQH-QKPEPGQRLRVGGMVMPGSVKRDPNTLAVSFKLYDGNGIISVSYVGILPDLFREGQGIVAQGVLEPGNLVNAKEVLAKHDENYTPPEIKNAMKVNPNEPQDGYHPA--GSQSMSGFKSKVKKAVIPVAGLGTRMLPATKAIPKEMLPLVDKPLIQYVVNECIAAGINEIILVTHSSKNSIENHFDTSFELEAMLEKRVKRQLLDEIQSICPPHVTIMQVRQGIAKGLGHAVMCAHPLVGDEPFAVILPDVIIDEYESDLTKDNLAQMLSRYEESGRSQIMVEPVADVTAYGVVDCKGASLNAGESAPMVGVVEKPKAAEAPSNLAVVGRYVLSADIWPLLAKTPPGA…					--------------------------------MFFLYPLFAVIIWSINSIVSKLSASAIDPAAISFYRWLLALLVLTPFVLPGVWRARVAIKPHLWRLAMLGLLGMVLYQSLAYYAAHSVSALFMGIIGALIPLLTVLLSVVILRIAPTLGILLGSIISFIGLVWLVSEGNVMQLLNHGLGKGELLMLAASAAYALYGVLTRRWALP---LPIWQSLYVQILFGVVLLLPGFLLAPEVALNLHNLPLVAFAGLFA					MQQVVLATGNPGKVRELADLLAAFGLDIVAQTALGVESAEETGLTFIENAILKARHASAVTGLPAIADDSGLAVDVLGGAPGIYSARYAGEEATDRQNLDKLLAALNAVPDGERQAHFHCVLVYLRHAADPTPLVFHGSWTGEIAHSAAGVGGFGYDPIFFVPELGKTAAEMSKSEKLAVSHRGKALNLLLDAMKHGMRTHSIKIQSLKRTQHVSTPVMTS-PVCANGLISELIYNEDHPGMTQLLLLPLLQQLGTQSRWQLWLTPQQKLSRDWLLRSGLPLDKVMQSPRCGTITTVEAMIKALQTGNYSVVLGWLADEISVSERQRLQQAAKSGQALGLIMRSERGVLSPSRPLDGVKIQSSLYHMNKILLYCRQGFEKECAAEITAKAAEREIFGFA…					MSKSPKEFVPLTVAVMTVSDSRDEHNDTSGNYLSEVVAATGHHLAEQVICADNRYQIRAVVSRWIASEQIQVIIINGGTGFHVKNSTPEALLPLFDRTIDGFGELFRMISFEEIDSSTLQSRAVAGMANQTLIFAIPGSTGACRQAWERIISSQIDSTTAPCNFVSQLKKF---VGKTLKKQRPVNLDLSTIKLPLTAIASILHRVSGVITFVAVGILLWLLGLSLSSPEGFQQAAAIMSGFVVRFIVWGILTALAYHIAGGIRHLLMDFGFLEETLAAGTRSAQVTFGITVVLSVLAGVLVWMNSLNELYKSHLMTLQQHAQQVLAAGNLEALLIHSGELQNVFLDDHTYPFKVNPQFKAWLPVTQNPNCWLWIDGVSKPKLWFYSPVDYWHKPEQVP…					MKIFSALALVLAALMLQGCAAVVIGSAAVATKSATDPRTVGTQVDDGTLELRVANALATNAQVKA-AHVNAMAYQGKVLLTGEAPTQAVADTAKDLAAKVDGAVEVYNEIRIGPNASLGTSSTDTWITTKVRSQLLTSDKVKSSNVKVTTEQGEVFLMGLVTAQEGQAAAEIASKVSGVTHVTTAFTAPKMSKKLWGALIIALIASWLGLK-P---GQHPIAHHNESASQTVST--------PRQTADG---SDIAALTNPQKVAAWIHQNHRLPDYYIRKSDARRDGWEPSRSNLCDVLPGRAIGGDHFSNREGRLPDANGRRWFEADVNYRCGHRNADRLLYSSDGLVFLTTDHYRTFTRIPMIQMRQKRVLPGFGLSLGTSLFFTCLILLLPISAL…					-----------------------------------MAPAQAANNKKVIMANNIRIEEDLLGMREVPADAYYGVHTLRAIENFRISNSKISDIPEFVRGMVMVKKAAALANKELQTIPRNIANTIIQACDEVLNNGKCMDQFPVDVYQGGAGTSVNMNTNEVLANIGLELMGHQKGEYQFLNPNDHVNKCQSTNDAYPTGFRIAVYSSILKLLDAIKELGEGFERKAAEFETILKMGRTQLQDAVPMTLGQEFHAF					-MSQRQRLSVVMIAKNEAELLPEALASVSWADEIVVLDSGSTDNTVQVARDHGAQVFQAEGWEGFGKQRQRAQAHAQGDMILMIDADERVTPELRDAIEQVLIQP-ASDNVYSLGRSNLFLGRFMRHSGWYPDRVMRLYPRKLNYNDNLVHESLETQGAPVVKLVGDLQHLTCRDLIAFQRKQMNYAEAWAQERFQRGKRCGLFSIFSHTLGAFVKTLLLRAGFLDGKQGWILAVVNAQYTFNKYSALWALH---					MTTQAP-GSMLPLSPEQLARLQAATTDYSPTQLAWLSGYFWGRV-----EQAPGSAVASSTPPAAAAEAPVITLLSASQTGNARRLAEQLRDDLLAAKLNVNLVNAGDYKFKQIGQEKMLVVVTSTQGEGEPPEEAVALHKFLMSKKAPKM-DGAAFAVFGLGDTSYEFFSQAGKDFDSRLAELGGERLLDRVDADVEYAEQATAWRSALTAILKARVPTESPAQAAATVAGSVNEVTTSPYSKEAPLSASLAVNQKITGRDSDKDVRHIEIDLGDSGLRYQPGDALGVWYENDAALVSELLELVWLKGDEPVEVQGRTLPLAEALQKHFELTVNTAQIVAQYAQLSRNAELLALVDDKARLQHYAQQYPIVDMVRLAPSELSAEQLTGLLRPLTPRLY…					MSSIRLADLAQQLDAELHGDGDIVISGIASMQSATTGQITFLANSRYREQLALIKASAVVLTEADLEWCHTAALVVKNPYLTYARMAQILDTTPQPAQNIAPSAVIDPSARLGANVAIGANAVIEAEVELGDNVVIGAGCFVGKKTRIGSGTRLWANVSVYHEIQIGQDCLIQSGTVIGSDGFGYANDRGNWVKIPQLGAVIIGDRVEIGACTTIDRGALDNTLIGNGVIIDNQCQIAHNVVIGDNTAVAGGVIMAGSLKIGRYCMIGGASVINGHMEICDKVTVTGMGMVMRPITEPGVYSSGIPLQPNKTWRKTAALVMNIDDMSKRLKAIERKVGKDD-MKEKSSEGVRLDKWLWAARFYKTRALAREMIEGGKVHYNGQRSKPGKLVELNAELTL…
>P_s_indologenes					>P_rodasii					>P_cypripedii					>P_anthophila					>P_agglomerans					>P_dispersa					>P_brenneri					>P_rwandensis					>P_wallisii					>P_agglomerans
MNKSRQQHLTRWLRQQCHHAGPWLRVTSLLGCAGALLIIMQAWLLASLLQALIIDRHSPASLLSSFSLLILCFVLRAALNYAREQAGFRAGQAIRQALRKQVLDRLAALGPAWIQGKPAGSWATLLLEQTEDMQAYYARYLPQMTLAAVIPCCILLTLFPLNWAAGLILFATAPLIPLFMALVGMGAAEANRRNFVALARLSGNFLDRLRGRETLRLFHRADAEKQAIADATTDFRQRTMEVLRLAFLSSSVLEFFASLSIAVVAVYFGFSYLGELHFGDYGRGVTLFAGFLVLILAPEFFQPLRDLGTFYHAKAQAIGGADALERFMQETPEAENTSASDAFSATAPVELVAENLTVHAPNGHQLCGPLTFTLRAGTRVALVGKSGAGKTALLNALLG…					VNIRRRNRLYMVVAILVGLGLATSLVMYALRSNIDLFYTPSEILYGKGEAH-QMPETGQRLRVGGMVMPGSVKRDPKTLAVSFKLYDANGVISVSYEGILPDLFREGQGVVAQGVLEDGNLVNAKEVLAKHDEKYTPPEIEDAMKQNHKGPAATYQQA--GAQS---------------------MLPATKAIPKEMLPLVDKPLIQYVVNECIAAGINEIVLVTHSSKNAIENHFDTSFELESMLEKRVKRQLLDEIQSICPPHVTIMQVRQGIAKGLGHAVMCAHPLIGDEPVAVILPDVIIDEYESDPTKDNLAEMLARYEESGRSQIMVEPVADVTAYGVVDCKGADLAPGQSAPMVGVVEKPKAAEAPSNLAVVGRYVLSADIWPLLAKTPPGA…					--------------------------------MNFLFPLVAVLIWSINTIVSKLSAGSIDPAAISFYRWILALVVLTPFALPGVWRHRRQIIASSGRLLILGLLGMVLYQSLAYYAAHSVSAVMMGILGATIPLLTILLSLVVLRLAPTRGILIGGLLSFAGLVWLVSAGNPAQLLHQRLGNGELMMLAASTSYALYGVLTKRWAIP---LPTWQSLYVQIFFGVLLLLPGFLRTPDVSLNAHNIPLVLFAGLFA					MQKVVLATGNPGKVRELAELLSAFGLDIVAQSDLGVESAEETGLTFIENAILKARHAAQITGLPAIADDSGLAVDALGGAPGIYSARYAGEDASDQQNLEKLLQALENVPDGQRQAQFHCVLVYLRHADDPTPLVFHGSWEGEITRSAAGAGGFGYDPIFSVPALGKTAAELSKAEKGAVSHRGKALTLLLEAMRNAMRTQHPDNARYAHRYASSSV-----PAAQPGGITELRYSEQ-PGMMQMLLLPLLQQLSQQSRWQLWLTPAHKLNRAWLQESGLPLNKSMHIADSERLNAVEAMVRALRTGNYSVVLAWIPYELDEDERRQLENAAAEGEALGLILRSGGTSEAPLRPQNSIKIQSDLFHMNKVLLYCRPGFEKECAAEISAKAAEREVYGFP…					MGKPASEFQAVQIAVMTVSDRRDASDDTSGDYLREAAAEAGHEVVDHAIVPDNLYRIRATVSRWIASEDVQVVIINGGTGFNLKNSTPEALLPLFDREIDGFGELFRMISYEEIGGSTLQSRAIAGLANQTLILAVPGSTSACRTAWERIIADQLDARTAPCNFVSHLKKR---VGKTVKKQRPVNLDLSTIRFPVTAISSILHRVSGVITLVAIGILLWLLGLSLSSPEGFQHAASIMDGFFAKFIMWGILTALAYHAVSGIRHMLMDFGYLAETLQVGKRSAHMTFVITVVLAILAGVLVWMDSLKTLYHAHIATLQQRAQQVLARNKLDAMLIHSGELLTVFLDDHTYPFKVNPQFKAWVPVTQVPNCWLWIDGVNKPKLWFYSPVDYWHNVEPLP…					MKALNAIAILLTAMLLQGCVAVVAGGAAVATKTATDPRTVGTQVDDGTLELRVTNALAKDEQIKNQARVVVTAYQGKVLLTGQAPSADLASRAKQIAMGVDGATEVYNEIRTGQKVSLGTSSSDTWITTKIRSQLLGSDQVKSSNVKVTTENGEVFLLGLVTQEEAKAAADIASRVSGVKHVTTAFTILKMSKKLWIGLLFALVVCWIGLK-P--------------HLSGTAP--------EKQT-D------IAQLTDAHRVARWLQQHHRLPDFYLTKSAARRQGWNPAQGNLCEVLPGRAIGGDRFSNRERRLPMQAGRQWYEADVNYDCGHRDADRLLYSSDGLIFLTTDHYRSFTPVPMLASAQKRVLPGFGLSLGTSLLFTCLILLLPISAL…					VICMRTFLMHQNMIVLTSMKTDKMSLRVHHDKINTSSVMVSGNNKKVIMANNIRIEEDLLGMREVPADAYYGVHTLRAIENFYISNSKISDIPEFVRGMVMVKKAAAMANKELQTIPRNIADTIIQACDEVLNKGRCMDQFPVDVYQGGAGTSVNMNTNEVLANIGLELMGHQKGEYQYLNPNDHVNKCQSTNDAYPTGFRIAVYSSLLKLLDGISQLADGFERKADEFQTILKMGRTQLQDAVPMTLGQEFHAFSVLLNEETKSILRTGELLLEVNLGATAIGTRLNTPDGYQHLAVQRLAEVSNLPVVPAEDLIEATSDCGAYVMVHSSLKRLAVKLSKICNDLRLLSSGPRAGLNEINLPELQAGSSIMPAKVNPVVPEVVNQVCFKVIGNDITVT…					-MSQRQRLSVVMIAKNEAELLPEALASVSWADEIVVLDSGSHDATADVARTLGAQVYQANGWDGFGKQRQRAQAFASGDMILMLDADERVTSALRRAIEQVLEQP-ASNKVYSLGRSNLFLGRFMRHSGWYPDRVMRLYPRALNYNDNLVHESLETQGAPVVALPGDLQHLTCRDLIAFQRKQMNYAEAWALERFQRGKRCGIFSIFSHTLGAFLKTLLLRAGFLDGKQGWILAVVNAQYTFNKYSALWALH---					---------MLPLSPEQLTRLQAATTDFNPTQLAWLSGYFWGMV-----NQQPGAGVAS---APAQAEAPGITLISASQTGNARRLAEQLRDDLLAAKLSVNLVNAGDYKFKQIGQEKLLVIVTSTQGEGEPPEEAVALHKFLLSKKAPKL-DGAAFAVFGLGDTSYEFFSKAGKDFDSRLAELGAERLLDRVDADVEYSELASAWRLQLTDLLKARVPSATPAQAAVSAAGSVNVIDSSPYTKEAPLTASFALN					MSSIRLADLAQQLDAELHGDGDIVISGIASMQSATTGQITFLANSRYREQLALIKASAVVLTEADLEWCNTAALVVKDPYLTYARMAQILDTTPQPAQNIAPSAVIDPSARLGSNVAIGANAVIEADVELGDNVVIGAGCFVGKKTRIGSGTRLWANVSVYHEIEIGQDCLIQSGTVIGSDGFGYANDRGNWVKIPQLGAVIIGDRVEIGACTTIDRGALDNTLIGNGVIIDNQCQIAHNVVIGDNTAVAGGVIMAGSLKIGRYCMIGGASVINGHMEICDKVTVTGMGMVMRPITEPGVYSSGIPLQPNKTWRKTAALVMNIDDMSKRLKAIERKVGKDDMKKEKSSEEVRLDKWLWAARFYKTRAIAREMIEGGKVHYNGQRSKPGKVVELNAELTL…
>P_vagans					>P_wallisii					>T_sp_NML_06					>E_pyrifoliae					>P_septica					>E_tasmaniensis					>P_sp_GM01					>E_billingiae					>P_conspicua					>E_tasmaniensis
MDKSRQQHLTRWLRQQRRFAGRWLRLNTLLGMVSALLIIAQAGLLASLLQALIIDQQPRETLTVSILLLLLCFALRALINYARELTGYRAGQAIRQALRQQVLDRLSALGPAWIQGKPAGSWATLLLEQIEEMQEYYARYLPQMTLAVLIPCCILLTVFPLNWTAGLILFATAPLIPLFMALVGMGAAEANRRNFLVLARLSGNFLDRLRGRETLRLFHRGEAEQQAVADATTDFRQRTMDVLRLAFLSSAVLEFFASLAIAVVAVYFGFSYLGELHFGDYGHGVTLFAGFLVLILAPEFFQPLRDLGAFYHAKAQAVGGADALETFMQATPDAAPQEGQLPFTADRSIALVADDLRVCAPDGQLLCGPLTFTIAAGEQIALVGQSGAGKTALMNALLG…					VNIRRRNRLYVVVAVLVGLGLATALVMYALRSNIDLFYTPSEILYGKGEEH-QKPEAGQRLRVGGMVMPGSVKRDPKTLAVSFKLYDANGVISVSYEGILPDLFREGQGVVAQGVLEAGNLVNAKEVLAKHDEKYTPPEIQDAMKNNHKGPAAAYQQA--GTQSMSAYKSKVKKAVIPVAGLGTRMLPATKAIPKEMLPLVDKPLIQYVVNECIAAGINEIVLVTHSSKNAIENHFDTSFELESMLEKRVKRQLLDEIQSICPPHVTIMQVRQGIAKGLGHAVMCAHPLVGDEPVAVILPDVIIDEYESNPTKDNLAEMLARFEESGRSQIMVEPVADVTAYGVVDCQGAELAPGQSAPMVGVVEKPKAAEAPSNLAVVGRYVLSADIWPLLAKTPPGA…					--------------------------------MNFLFPLGAVVIWAVNSVVSKMTVGLITPEAISFYRWAIALLVLTPLTLPGLIRHRAALRGNLLKLLTLGALGMVLYQSLAYYAAQTVSALFIGILVASIPLLTVVFSLFFLRLTPTLGIISGALLSLCGLTLLVSQGHPAQLLHQGLGKGEILMLAAAAAYALYGVLTKRWAADLSRLPHWQSLYMQILFAVLMLIPGFVHTTDIHLTAQNLPLVLFAALPA					MQKVVLATGNPGKVRELADLLAASGLDIVAQTELGVESAEETGLTFIENAILKARHASAMTGLPAIADDSGLAVDILGGAPGIYSARYAGENASDQQNLDKLLAALDAVADGERQAHFHCVLVYLRHAADPTPLVFHGSWTGVIARTTSGVGGFGYDPIFFVPDLGKTAAELSKSEKLAVSHRGKALNLLLSAMKHGMRTHFMKNQSVKRNQHVSTPAIPA-SICADGLISELVHNEDHPGMTQLLLLPLLQQLGTQSRWQLWLTSQQKLSRDWLLRSGLPLDKVMQSPYCGTITTVEAMIKALQTGNYSVVLGWLADEISETERKRLQQAAKSGQALGLIMRSECNVLPSARPLHGLRIQSSLYHMNKILLYCRQGFEKECAAEITAKAAGHEIFGFA…					MGKSTGEFIPVNLAVLTVSDRRDASSDTSGDYLRAAAHEAGHVVVDHAIVGEDRYRIRAIVSRWIASLDVQVVVINGGTGFNAKNITPEAIEPLFDRKIEGFGELFRMFSWEDIGGSTLQSRALAGIANGTLIFAVPGSTSACESAWERIIADQIDARTGPCNFVSHLKKL-----------------------------------------VALGILLWLLGTSLSSPEGFQHAAAIMDSFFVKFILWGILTALAFHTVGGIRHMLMDFGYLAETLAIGRQSAWVTFGITVVLSILAGVLVWMDSLKTLYQTHIATLQQRAQQVLARNKLDAMLIHSGELLTVFLDDHDYPFKVNPQFKAWVPVTQVPNCWLWIDGVNKPKLWFYSPVDYWHNVEPLP…					MKALSACAVILTALMLQGCVAAVVGSAAVATKTATDPRTVGTQVDDGTLELRVTNALSKDEQIKQTTHIVATAYQGKVLLTGQAPGNELALRAKQIAVGVDGATEVYNEIRTGNKVSFGTASSDTWITTKVRSQLLGSDQVKSSSVKVTTENGEVFLLGLVTGEEAKAAADIASRVSGVKHVTTAFTLLKMNKKFIIAAILVIIASYAGLH-K---QGAHTANGPGQHTQTGAV--------RTESRD------ISVLTQQQRVADYLQQHQQLPDYYIRKGEARRQGWDPAKGNLCSALPGRAIGGDRFSNREGGLPDKAGRRWFEADVNYQCGRRGTDRMLYSSDGLIFVTKDHYRHFEQVKMLATRSKRVLPGFGISLGSSLFFTCLILLLPISAL…					------------------------------------------------MANNIRIEEDLLGMREVPADAYYGVHTLRAIENFYISNNKISDIPEFVRGMVMVKKAAALANKELQTIPRNIANTIIQACDEVLNNGKCMDQFPVDVYQGGAGTSVNMNTNEVLANIGLELMGHQKGEYQYLNPNDHVNKCQSTNDAYPTGFRIAVYASILKLLDGISQLSEGFQRKAVEFENILKMGRTQLQDAVPMTLGQEFHAF					-MSSRQALSVVLIAKNAADLLPECLESVSWADEIVLLDSGSSDGTPQVAARHGAKVFHSTEWHGYGRQRQLAQSYANHPMILMIDSDERVTQQLRASIEAVLTSPASADAVYSLGRRNLFLGRFMRHSGWYPDRVTRLYPSRYQYNDHQVHESLDTQGVAVTALKGDLLHLTCRDFSAFQWKQFAYAEAWAKQRYHQGKRCGIVSIFTHTIGAFFKTLVLRAGFLDGKQGWLLAVVNAQYTFNKYAALWALNNSS					MTTQAP-GSLLPLSPEQLARLQAATTDYSPTQLAWLSGYFWGRV-----EQTPGSAVASAPTPIAAAEAPSVTLLSASQTGNARRLAEQLRDDLQAARLNVNLVNAGDYKFKQIGQEKLLVVVTSTQGEGDPPEEAVALHKFLLSKKAPKM-TGTAFAVFGLGDSSYEFFSKAGKDFDSRLAELGAERLLDRVDADVEYADQATAWRSALTEILKQRVPTESPAQAAATAAGSVNEVTTSPYTKEAPLSATLAVNQKITGRDSDKDVRHIEIDLGESGLRYQPGDALGLWYENDSALVSELLELVWLKGDEPVQVQGATLPLAEALQKHFELTVNTAQIVAQYAQLSRDAELLALVDDKARLQQYAQRYPIVDMIRLAPAELSAEQLTTLLRPLTPRLY…					MSSIRLADLAQQLDAELHGDGDIAISGIASMQSAQPGQITFLSNSRYREQLAACQASAVVLTEADLEFFPGAALVVKNPYLTYARMAQLLDSTPQPATDIAPSAVIDATARLGNNISIGANAVIESDVVLGDNVVIGPGCFVGKKTQIGAGSRLWANVSVYHEVQIGRDCLIQSGTVIGADGFGYANDRGNWVKIPQLGTVIIGDRVEIGACTTIDRGALDNTQIGNGVIIDNQCQIAHNVVIGDNTAVAGGVIMAGSLKIGRYCMIGGASVINGHMEICDKVTVTGMGMVMRPITEPGVYSSGIPLQPNKAWRKTAALVMHIDEISKRLKNIERKVT----MRDKPSEGVRLDKWLWAARIYKTRAAAREMIEGGKVHYNGQRSKPSKLVEVAASLTL…
>P_s_stewartii					>P_brenneri					>P_septica					>P_septica					>T_ptyseos					>P_agglomerans					>T_sp_NML_06					>P_dispersa					>T_morbirosei					>P_dispersa
MNKSRQQHLTRWLRQQCHHAGPWLRVTSLLGCAGALLIIMQAWLLASLLQALIIDRHSPASLLSSFSLLILCFVLRAALNYAREQAGFRAGQAIRQALRKQVLDRLAALGPAWIQGKPAGSWATLLLEQTEDMQAYYARYLPQMTLAAVIPCCILLTLFPLNWAAGLILFATAPLIPLFMALVGMGAAEANRRNFVALARLSGNFLDRLRGRETLRLFHRADAEKQAIADATTDFRQRTMEVLRLAFLSSSVLEFFASLSIAVVAVYFGFSYLGELHFGDYGRGVTLFAGFLVLILAPEFFQPLRDLGTFYHAKAQAIGGADALERFMQETPEAENTSASDAFSATAPVELVAENLTVHAPNGHQLCGPLTFTLRAGTRVALVGKSGAGKTALLNALLG…					VNIRRRNRLYAVLAILIGLSLATALVMYALRSNIDLFYTPSEILYGKGEAH-EVPEPGQRLRVGGMVMPGSVKRDPNTLAVSFKLYDASGVVSVSFEGILPDLFREGQGVVAQGVLETGNRIIAKEVLAKHDEKYTPPEIEDAMKKNHNGPQSLYQPG--KQSSMSAYKSKVKKAVIPVAGLGTRMLPATKAIPKEMLPLVDKPLIQYVVNECIAAGINEIVLVTHSSKNAIENHFDTSFELESMLEKRVKRQLLDEIQSICPPHVTIMQVRQGIAKGLGHAVMCAHPLVGDEPVAVILPDVIIDEYESNPTKDNLAEMLSRYEESGRSQIMVEPVADVTAYGVVDCQGAELNPGDSAPMVGVVEKPKAAEAPSNLAVVGRYVLSADIWPLLAKTPPGA…					--------------------------------MNLLFPLLAVLIWSVNTIVSKLSAGSIDPAAISFYRWLLALMVLTPFALPGAWRHRHAIRASLGRLLILGLLGMVLYQSMAYYAAHSVSAVMMGILGATIPLLTILLSLVVLRLAPTRGILIGGVLSFAGLVWLVSEGHPAQLLHQRLGSGELMMLAASTSYALYGVLTKRWAIP---LPTWQSLYVQVFFGVLLLLPGFLHAPDVALNTRNIPLVLFAGLFA					MQKVVLATGNPGKVRELADLLSAFGLDIVAQTDLGVESAEETGLTFIENAILKARHAAQITGLPAIADDSGLAVDALGGAPGIYSARYAGEAASDRENLEKLLNALETVPDGERQAQFHCVLVYLRHAEDPTPLVFHGSWAGEITRSAAGEGGFGYDPIFYVPELGKTAAELSKTEKGAVSHRGKALTLLLEAMRNAMRTQHFNNAGFAHRHVSASK-----PSQHSGWITELRYSEQ-PGMMQMLLLPLLQQLSRESRWQLWLTPAHKLNRAWLQQSGLPLEKSMHVADSERCTSVEAMIKALRTGNYSVVLAWIPYDLDEEERRELEQAAAEGKALGLIMRPNGTTEPSLRPNKGLKIQSDLFHMNKVLLYCRPGFEKECAAEIAACAAEREIYGFP…					MSKSPKEFVPLSVAIMTVSDSRDASQDSSGDYLAEAIREAGHQVAEQLICPDNRYSIRAGVSRWIASEQVQVVIINGGTGFHPKNSTPEAIEPLLDRTIEGFGELFRMVSYEDIGAATLQSRALAGLANQTLIFALPGSTSACRQAWERIICSQIDATTRPCNFVSQLKKI--LCGQIVKKQRPVNLDLSTIRFPVTAIASILHRVSGVITLIAVGILLWLLGLSLSSPEGFQQASTLLGSFIVRFILWAIMTALAYHIVGGLRHLLMDFGMLDESLEAGTRSAQISFVITVILAVLAGVLLWMDSLNELYKKHLATLQHRAQQVLAANHLDALLIHSGELLSVFLDDHHYPFKTNAHFKAWVPVTQTPNCWLWVDGVNKPRLWFYSPVDYWHKTDALP…					MKALNAIAILLTAMLLQGCVAVVAGGAAVATKTATDPRSVGTQVDDSTLELRVTNALAKDQQIKTDARIIATAYQGKVLLTGQAPSQEIAGRAKQITMGVDGATEVYNEIRIGQKVTLGTTSSDTWITTKIRSQLLGSDQVKSSNVKVTTENGEVFLLGLVTPQEAQAAADVASRVSGVKHVTTAFTMLKMSKKLWIGLFLVLAACFYGLK-P--------------YLNSVSA--------PAQA-D------IATLTDAHTVARWVLQHQQLPDYYLTKNDARKRGWNPAKGNLCDVLPGRAIGGDRFTNREKRLPARAGRQWYEADVNYRCGHRDADRLVYSSDGLVFLSTDHYRSFRQVPMFAASQKRVLPGFGLSLGTSLLFTCLILLLPISAV…					------------------------------------------------MVNNIRIEEDLLGMREVPADAYYGIHTLRAIENFYISNSKISDIPEFVRGMVMVKKAAAMANRELQTIPATLADTIIRACDEVLNNGTCMDQFPVDVYQGGAGTSVNMNTNEVLANIGLELMGHNKGDYQYLNPNDHVNMCQSTNDAYPTGFRIAVYNSLLKLVEAIHALAEGFQRKAAEFKNILKMGRTQLQDAVPMTLGQEFNAF					-MSQRQRLSVVMIAKNEAELLPEALASVSWADEIILLDSGSSDATIEVARAHGAQVYQADGWAGFGKQRQRAQAFASGDMILMLDADERVTPELRRAIEQVLTQP-PSDKVYSLGRSNLFLGRFMRHSGWYPDRVLRLYPRHLRYNDNLVHESLETQGTPVVALPGDLQHLTCRDLIAFQRKQMNYAEAWAQERFQRGKRCSILSVFSHTAGAFIKTLLLRAGFLDGKQGWILAVVNAQYTFNKYSALWALH---					MTNQAP---QLPLSAEQLTQLQKTTQDFSVTQLAWLSGYFWGRVSGE-TTAQPGATAPAA--ASTVSQAPAVTVISASQTGNARRLAEQLRDDLLAAGVTVTLVNAGDYKFKQIGQEKLLLIVTSTQGEGEPPEEAVALHKFLLSKKAPKF-TGTAFAVFGLGDTSYEFFCKAGKDFDQRLEELGAERLLARADADVDFQSTADQWRQEIVALLKQRLPASSAVEVSRAASGATDEIDSTPYTKEQPLVASLSVNQKITGNDSEKDIRHLEIDLGSSGLRYRPGDALGIWYENDPQLVEELLGLLWLDGSQQVSLKGETLSLSTALQQHFELTVNTPQIVEKYAHLSGNSELLALVSDKAALQAYAQQWPIVDMVRHAPTELHAEQLTELLRPLTPRLY…					MSSIRLADLAQQLDAELHGDGDIAISGIASMQSATPGQITFLANSRYREQLAQVQASAVVLTEADLEWCKTAALVVKNPYLTYARMAQLLDTTPQPAQNIAPSAVIDPSAKLGNNVSVGANAVIESGVELGDDVVIGAGCFVGKRTRIGRGSRLWANVTVYHEIQIGQDCLIQSGTVIGADGFGYANDRGNWVKIPQLGTVVIGDRVEIGACTTIDRGALDNTLIGNGVIIDNQCQIAHNVVIGDNTAVAGGVIMAGSLKIGRYCMIGGASVINGHMEICDKVTVTGMGMVMRPITEPGVYSSGIPLQPNKTWRKTAALVMNIDDMSKRLKAIERKVGKDD-MKEKTSEGVRLDKWLWAARFYKTRALARDMIEGGKVHYNGQRSKPGKVVELQAELTL…
>T_sp_NML_06					>P_allii					>P_s_stewartii					>T_ptyseos					>P_sp_aB					>P_rodasii					>P_rodasii					>P_wallisii					>P_deleyi					>P_wallisii
MNKTRQQFLLRWLKQQRHFGGRWLRISVMTGLFSALILILQAVILAQLLDNFISRQQAAGHFPGLLLALAGCFILRALLHYLREIAGFQAAAAIRTAIRQQVTDQLERQGPVTVAQQPVGSWSTLLQEQIDNMQDYYARYLPQMTLAGAIPLMILLVLTPLNWAAGLILFCTAPLIPLFMAMVGMGAAEANRRNFQALARLSGDFLDRLRGLDTLRLFDRGAAEQRAIGQTTEQFRLRTMEVLRLAFLSSAVLEFFAALSIAVVAVYFGFSYLGELHFGDYHRGVTLFAGFLVLILAPEFFQPLRDLGNFYHAKAQAIGAADVLETFLSDSPAAVSDSDAAQPQWHGAFSIVAADLVVLSPTGAALSDKLNFVLPQGKRVALVGMSGAGKTSLMNTLLG…					VNTRRRHRLYVVLAILTGFGLATALVMYALRSNIDLFYTPGEIINGKGEAH-IRPEPGQRLRVGGMVMPGSVTRDPQTLAVAFQLYDGSAVVSVNFVGILPDLFREGQGVVAQGVLEPGNLINAKEVLAKHDENYTPPEITMAMKPAPQGQEAVKQQA--GNTPMSAYKTKVKKAVIPVAGLGTRMLPATKAIPKEMLPLVDKPLIQYVVNECIAAGINEIVLVTHSSKNAIENHFDTSFELESMLEKRVKRQLLDEIQSICPPHVTIMQVRQGIAKGLGHAVMCAHPLIGDEPVAVILPDVIIDEYESNPTKDNLAEMLSRYEESGRSQIMVEPVSDVTAYGVVDCQGAELNPGDSAPMVGVVEKPKASEAPSNLAVVGRYVLSADIWPLLAKTPPGA…					--------------------------------MVFLFPLFAVLIWSVNAIVNKLSAGAIEPAAISFYRWLLALLVLTPFVLPGVLRQWQTIRPHLGRLMILGLLGMALYQSLAYYAAHSVSALFMGIIAALIPLLTVLLSVLILRIAPTVGILAGSLISFCGLIWLVSEGKPDQLLHRGIGTGEALMLAASACYALYGVMTKRWSIP---LPVWQSLYGQIAAGVMLLLPGFLMTPDVSLTPRNLPLVAFAGLFA					MQKVVLATGNAGKVRELAEPLAAFGLDIVAQTDLGVDAPEETGLTFIENALLKARHAAQVTGLPAIADDSGLAVEALNGAPGIWSARYAGEDASDRQNLDKLLAAMKDVPEDKRHAAFHCVLVYLRHANDPTPLVFHGRWPGVITREAHGEGGFGYDPVFLLPESGKTAAEMTKAEKLAVSHRGQALKQLLDALGHGMHTQRLTAKTFKMHHQSTQ------ASYTRGCISELSYQGQNPALLNMLLFPLLKQLGEQSRWQLWLTPAHKLSRHWLQQAGLPLEKSVQIASTERISSVSAMIKALRSGNFSVVIAWLPAGLSNSERHELEQAAIEGHTLGLIMREENTFDSPGGQENRLKIHSSLLHMNKVLLYCRSGFEKECAAEITARATALEVFGFA…					MGKPASEFQALQMAVMTVSDRRDASNDTSGDYLREAAAEAGHEVVDHAIVPDNLYRIRATVSRWIASEDVQVVIINGGTGFNLKNSTPEALLPLFDREIDGFGELFRMVSYEEIGGSTLQSRAVAGLANGTLILAVPGSTSACRTAWERIIADQLDARTAPCNFVSHLKKR---VGKTVKKQRPVNLDLSTIRFPVTAITSILHRVSGVITLVAIGILLWLLGLSLSSPEGFQHAASIMDGFFAKFIMWGILTALAYHAVSGIRHMLMDFGYLAETLESGKRSAHMTFVITVVLAILAGVLVWMDSLKTLYHAHIATLQQRAQQVLARNKLDAMLIHSGELLTVFLDDHTYPFKVNPQFKAWVPVTQVPNCWLWIDGVNKPKLWFYSPVDYWHNVEPLP…					MKALNAVAILLTAMMLQGCVAVVAGGAAVATKTATDPRTVGTQVDDGTLELRVSNALAKDEQIKNQARVVVTAYQGKVLLTGQSPSADLASRAKQIAMGVDGATEVYNEIRTGQKVSLGTSSSDTWITTKIRSQLLGSDQVKSSNVKVTTENGEVFLLGLVTQQEASAAADVASRVSGVKHVTTAFTILKMSKKLWIGLILALAATWAGLK-P--------------HSGGKTA--------AHND-D------IAQLTEANTVARWLQQHHKLPDLYLTKGEARRQGWNPSKGDLCNVLPGRAIGGDRFSNREQRLPMQQGRQWYEADVNYDCGHRDADRLLYSSDGLIFLTTDHYRSFKQVNMFALAQKRVLPGFGLSLGTSLLFTCLILLLPISAL…					-----------------------------------------------------------------------------------------------------------------------------------------MDQFPVDVYQGGAGTSVNMNTNEVLANIGLELMGHQKGEYQFLNPNDHVNKCQSTNDAYPTGFRIAVYASILKLLDGISQLSEGFQRKAVEFENILKMGRTQLQDAVPMTLGQEFHAF					-MSQRQRLSVVMIAKNEAELLPEALASVSWADEIVLLDAGSQDATSEVARTRGAQVYQADAWAGFGIQRQRAQAFATGDMILMIDADERVTPELRRAIEQVLAQP-PSDTVYSLGRSNLFLGRFMRHSGWYPDRVMRLYPRHLRYNDNLVHESLDTQGAPVVALPGDLQHLTCRDLIAFQRKQMNYAEAWAQERFQRGKRCGLLSIFSHTIGAFLKTLLLRAGFLDGKQGWILAVVNAQYTFNKYSALWALH---					-------------------------------------------------------------------------------------------------------------------------------------------------------------------------------------------------------------------------------------------------------------VN					MSSIRLADLAQQLDAELHGDGDIAISGIASMQSATPGQITFLSNSRYREQLANVQASAVVLTEADLEWCKTAALVVKNPYLTYARMAQLLDTTPQPAQNIAPSAVIDPGAKLGNNVSIGANAVIESDVELGDDVVIGAGCFVGKRTRIGRGSRLWANVTIYHEIQIGQDCLIQSGTVIGADGFGYANDRGNWVKIPQLGTVIIGDRVEIGACTTIDRGALDNTLIGNGVIIDNQCQIAHNVVIGDNTAVAGGVIMAGSLKIGRYCMIGGASVINGHMEICDKVTVTGMGMVMRPITEPGVYSSGIPLQPNKTWRKTAALVMNIDDMSKRLKAIERKLGKDE-MKEKISEGVRLDKWLWAARFYKTRALAREMIEGGKVHYNGQRSKPGKPVELQAELTL…
>P_conspicua					>P_agglomerans					>P_dispersa					>P_ananatis					>P_vagans					>P_sp_aB					>P_wallisii					>E_tasmaniensis					>P_cypripedii					>E_pyrifoliae
MDKTRQQHLTRWLRQQRHFAGRWLRLSTLLGVISALLIIAQAGLLATLLQALIIEQQPRAALSGEMLLLLLCFVLRALIHYARERVGYRAGQAIRQSLRKQVLDRLSALGPAWIQGKPAGSWATLLLEQIEEMQDYYARYLPQMTLAVLIPCCILITLFPLNWAAGLILFATAPLIPLFMALVGMGAAEANRRNFLVLARLSGNFLDRLRGRETLRLFDRGAAEQQAVAAATTDFRQRTMEVLRLAFLSSAVLEFFASLAIAVVAVYFGFSYLGELHFGDYGQGVTLFTGFLVLILAPEFFQPLRDLGAFYHAKAQAVGGADALEQFMQANPTTGPEQGETPFTASQPIALAAVDLVVCAPNGQPLCGPLTFNLAAGERVALVGQSGAGKTALMNLLLG…					VNTRRRNRLYAAVAILLGLGLATALVMYALRSNIDLFYTPGEILYGKGEAH-EKPEAGQRLRVGGMVMPGSVRRDPNTLAVSFKLYDARGVVSVSFEGILPDLFREGQGVVAQGVLAAGNQVVAKEVLAKHDEKYTPPEIEDAMKSNHTGPQSLYQAG--NKSSMSANNTKVKKAVIPVAGLGTRMLPATKAIPKEMLPLVDKPLIQYVVNECIAAGINEIVLVTHSSKNAIENHFDTSFELESMLEKRVKRQLLDEIQSICPPHVTIMQVRQGIAKGLGHAVMCAHPLIGDEPFAVILPDVIIDEYESNPTKDNLAEMLSRYEESGRSQIMVEPVADVTAYGVVDCQGAELNPGDSAPMVGVVEKPKASESPSNLAVVGRYVLSSEIWPLLAKTPPGA…					--------------------------------MNLLLPLVAVLIWSINTIVSKLSAGSIDPAAISFYRWLLALLVLTPFCLPGVWRHRHTIKTQLWRLLVLGLLGMVLYQSLAYYAAHSVSAVMMGILGATIPLLTILLSLVVLRLAPTRGILIGGLLSFAGLVWLVSAGNPAQLLSQRLGNGELMMLAASTSYALYGVLTKRWAIP---LPTWQSLYVQIFFGVLLLLPGFWHAPEVALNADNIPLVLFAGLFA					MQKVVLATGNPGKVRELADLLADFGLDVVAQTELGVESAEETGLTFIENAILKARHAAQVTGLPAIADDSGLAVNALGGAPGIYSARYAGEDASDQQNLEKLLQALENTPDGQRQAQFHCVLVYLRHAADPTPLVFHGAWEGEITRTAAGEGGFGYDPVFWVPALGKTAAELTKAEKGKVSHRGKALTLLLEAMRNAMRTQHTSNVCSAHRYASSSV-----PATHKGWITELRYSEQ-PGMMQMLLLPLLQQLSQQSRWQLWLTPAHKLSRVWMQEAGLPLEKSMHIADAERYNAVEAMIKALRTGNYSVVLAWIPYELDVDERRELERAAAEGKALGLILRSGETLKTAVRPENSLKIQSDLFHMNKVLLYCRSGFEKECAAEISAKAAERNVYGFP…					MGKPASEFQAVQIAVMTVSDRRDASNDTSGDYLREAAAEAGHEVVDHAIVPDNLYRIRATVSRWIASDDVQVVIINGGTGFNLKNSTPEALLPLFDREIDGFGELFRMISYEEIGGSTLQSRAIAGLANGTLILAVPGSTSACRTAWERIIADQLDARTAPCNFVSHLKKR---VGKTVKKQRPVNLDLSTIRFPVTAISSILHRVSGVITLVAIGILLWLLGLSLSSPEGFQHAASIMDGFFAKFIMWGILTALAYHAVSGIRHMLMDFGYLAETLEVGKRSAHMTFVITVVLAILAGVLVWMDSLKTLYHAHIATLQQRAQQVLARNKLDAMLIHSGELLTVFLDDHTYPFKVNPQFKAWVPVTQVPNCWLWIDGVNKPKLWFYSPVDYWHNVEPLP…					MKALNAIAILLTAMLLQGCVAVVAGGAAVATKTATDPRSVGTQVDDGTLELRVTNALAKDQQIKTDARVVATAYQGKVLLTGQAPSQEIANRAKQITMGVDGATEVYNEIRIGQKVTLGTTSSDTWITTKIRSQLLGSDQVKSSNVKVTTENGEVFLLGLVTQQEAQAAADVASRVSGVKHVTTAFTMLKMSKKLWIGLFLVLAACFYGLK-P--------------YLNTGST--------PAQA-D------IATLTDAHTVARWVLQHQQLPDYYLTKSDARKRGWNPAKGNLCEVLPGKAIGGDRFTNREKRLPSRAGRQWYEADVNYRCGHRDADRLVYSSDGLVFLSTDHYRSFRQVPMFAASHKRVLPGFGLSLGTSLLFTCLILLLPISAV…					------------------------------------------------MANNIRIEEDLLGMREVPADAYYGVHTLRAIENFYISSSKISDIPEFVRGMVMVKKAAALANKELQTIPRNIANTIIQACDEVLNNGKCMDQFPVDVYQGGAGTSVNMNTNEVLANIGLELMGHQKGEYQYLNPNDHVNKCQSTNDAYPTGFRIAVYASILKLLDAISQLSEGFQRKAVEFENILKMGRTQLQDAVPMSLGQEFHAF					-MSTGQKLSVVMIAKDAAEILPECLESVSWADEIIVLDSGSSDATPDIAARHGAKVYHSSEWHGYGKQRQLAQSYASHPMILMIDSDERVTPELKRSVEKVLQRP-PAEVVYSFSRSNLFLGRFMRHSGWYPDRVTRLYPRHFRYNDSLVHESLETARAKTEQLHGDLLHLTCRDFSAFQWKQFAYAEAWAKQRHQQGKRCGIAAIFGHTAGAFIKTLVLRAGFLDGKQGWLLAVVNAQYTFNKYTALWALN---					MTTQAPPGSLLPLTPEQLARLQAATTDFSTTQMAWLSGYFWGMV-----NQTPGAVAVP---APVQADVPTILLISASQTGNARRLAEQLRDDLLAAKLSVNLVNAGDYKFKQIGQEKLLVVVTSTQGEGEPPEEAVALHKFLMSKKAPQL-KGAAFAVFGLGDTSYEFFSKAGKDFDSRLAELGAERLLDRVDADVDYAAQAIAWRQQITDILKARVPTEAPAIAAITAAGSVNEVHSSPYSKEAPLTASFAVNQKITGRDSDKDVRHIEIDLGDSGLRYQPGDALGVWYENDPALVSELLELLWLKGDEPVTIHGETLALSDALQRHFELTVNTPQIVEHYAALARNDALLALVGDKPKLQHYAQSLPIVDMVRQAPTELNAEQLTGLLRPLTPRLY…					MFSIRLAELAQQLDAELHGDGEVAISGIASMQSAQTGQITFLSNSRYREQLAACQASAVVLTEADLDFFPGSALVVKNPYLTYARMAQLLDSTPQPAKDIAPSAIIDATARLGNHVSIGANAVIESDVVLGDNVAIGPGCFVGKKTHIGAGSRLWANVSVYHEVQIGRDCLIQSGTVIGADGFGYANDRGNWVKIPQLGTVIIGDRVEIGACTTIDRGALDNTQIGNGVIIDNQCQIAHNVVIGDNTAVAGGVIMAGSLKIGRYCMIGGASVINGHMEICDKVTVTGMGMVMRPITEPGVYSSGIPLQPNKTWRKTAALVMNIDEISKRLKNIERKVGKD--MKEKTGEGVRLDKWLWAARFYKTRAAARQMIEGGKVHYNGQRSKPSKLVEIAATLTL…
>P_wallisii					>E_pyrifoliae					>P_allii					>E_billingiae					>P_sp_A4					>P_sp_A4					>P_sp_aB					>P_s_stewartii					>P_s_indologenes					>P_rwandensis
MNKSRQQALLRWLRQQRHHGARSLRVASLFGFAAALVIIAQAWLLASLLQNLIVAQQPRASLSTDFLLLLLCFVLRAALHYGREMAGHRAGTAIRRALRRQVLDRLESAGPAWIQGKPAGSWATLLLEQIEEMQEYYARYLPQMSLAVFVPCAILIAIFPVNWAAGLILLATAPLIPLFMALVGMGAADANRRNFLALARLSGDFFDRLRGRETLRLFHRASAEQQAIAASTRDFRQRTMEVLRLAFLSSAVLEFFASLAIAVVAVYFGFSYLGELNFGHYNTGVTLFAGFLALILAPEFFQPLRDLGAFYHAKAQAIGGADALETFLRESPDNAPATTGAAHLIAGPLHIHARDLQVMTAGGEALSQPLTFILQPGKRVALVGQSGAGKTALMNVLLG…					MNPRRKNRLVLVMVVLAGLGLATALVMYALRSNIDLFYTPGEMINGKGQQQ-LKPEAGQRLRVGGVVMPGSVKRDPNTLQVAFKLYDASGVISVSYDGILPDLFREGQGVVAQGVLQDATLVIAKEVLAKHDEKYTPPEIKDAMKPPLPAKVAGDNSA---RPSMSAYNSKVKKAVIPVAGLGTRMLPATKAIPKEMLPLVDKPLIQYVVNECIAAGINEIVLVTHSSKNSIENHFDTSFELEAMLEKRVKRQLLEEIQSICPPHVTIMQVRQGLAKGLGHAVMCAWPVIGNEPVAVILPDVILDEYESDLSKDNLAEMIRRFDETGHSQIMVEPVSDVTAYGVVDCQGAQLSPGDSAPMVGVVEKPKADKAPSNLAVVGRYVLSADIWPLLAKTPPGA…					--------------------------------MFFLFPLFAVLIWSVNAIVNKLSAGAIEPAAISFYRWLLALLVLTPFVLPGVIRRWQAIRPHLWRLMVLGLLGMALYQSLAYYAAHSVSALFMGIIAALIPLLTVLLSVLVLRIAPTVGILVGSLISFCGLIWLVSAGNLHQLLNHGIGAGEAMMLAASSCYALYGVMTKRWSIP---LPVWQSLYVQIAFGVLLLLPGFLMTSDVSLTPRNLPLVAFAGLFA					MQKVVLATGNPGKVREMADLLAAFGLDIVAQTELGVESAEETGLTFIENAILKARHAAAITGLPAIADDSGLAVDALGGAPGIYSARYAGEDASDRQNLLKLLAALENVPDDKRQAQFHCVLVYLRHAEDPTPLVFHGSWQGEITRSAVGEGGFGYDPIFFVPKLGKTAGEMTKAEKHAVSHRGKAMTLLLEAMRNAMQTHSLKSSSVKTGVRTAPDCAKAQPAAAAGLISELIYSENQPAMTQMLLLPLLQQLGTQSRWQLWLTPHQKLSRSWLIESGLPLDKVMQIHHSGAITTVEAMIKALQTGNYSVVLGWLTGDITLEDRQRLQKAAFAGKALGLIMRPDRINSASSRPFNGLKIHSTLYHMNKVLLYCRQGFEKECAAEITAKAAQREVFGFA…					MSKSGGEFIALNLAVLTISDKRDASNDTSGDYLREAATEAGHQVVDHAVIGDNRYRIRAIISRWIASEDVQVVIINGGTGFNSQNSTPEALLPLFDREIQGFGELSRMFSYEDIGSASLQSRAVAGMANQTLIFAVPGSTSACQSAWERIINEQLDARTRPCNFVKHLKKL---VGKTVKKQRPVNLDLTTIRFPVTAISSILHRVSGVIMFVAVGILLWLLGLSLSSPEGFQSAAIVMHSFIAKFIMWGILTALAYHAVGGIRHMLMDFGFLPETLQTGIRSAYAAFGITVVLSILAGVLVWMDSLKTLYRGHIATLQQRAQQVLARFKLDAMLIHSGELQNVFLDDHAYPFKVNPQFKAWVPVTQVPNCWLWIDGVNKPRLWFYSPVDYWHVVEPLP…					MKALNAVAILLCAMMLQGCIAVVAGGAAVATKTATDPRTVGTQVDDGTLELRVSNALGKDQQLKQQANISVTAYQGKVLLTGQAPDSSLSGRAKQIAMGVDGATEVYNEVRIGPKASLGTASSDTWITTKVRSQLLGSDQVKSSNVKVTTQNGEVFLMGLVTNEEARAAADIASRVSGVKHVTTAFTTLKMKNIRWIGLIALLAVCWYGLK-P--------------HFSPNTP------ASVSTSQN------ITAMTDAQQVARWVHQHHQLPDFYLTKREARQRGWDPARGNLCEALPGHAIGGDRFSNREGRLPEQQGRRWFEADVNYRCGHREADRLLFSSDGLVFLTRDHYRTFTALPMFAASHKRVLPGFGLSLGTSLLFTCLILLLPISAL…					------------------------------------------------MANNIRIEEDLLGMREVPADAYYGVHTLRAIENFYISNSKISDIPEFVRGMVMVKKAAAMANKELQTIPRNIADTIIKACDEVLNNGRCMDQFPVDVYQGGAGTSVNMNTNEVLANIGLELMGHQKGEYQYLNPNDHVNKCQSTNDAYPTGFRIAVYSSLLKLLDGISQLAEGFQHKADEFQTILKMGRTQLQDAVPMTLGQEFHAF					MTATRQRLSVVMIAKNEAALLPDCLASVSWADEIIVLDSGSTDDTLSLAQQAGAQVFQATEWQGYGKQRQRAQSFASGDMILMIDADERVTPELRQAIEQVLEAQ-PGPTVYSLSRSNLFLGRFMRHSGWYPDRVMRLYPRTLGYNDNQVHESLKTEGAPVKVLKGDLQHLTCRDLMVFQRKQLAYAEAWAQERFQRGKTCSLVSVFSHTAGAFVKTLLLRAGFLDGKQGWLLAVVNAQYTFNKYAALWALN---KTSAEGRT--MENQPKLNSSKEVISFLAERFPHCFSAEGEARPLKIGIFQDLVERVQGEMNLSKTQLRSALRLYTSSWRYLYGIKAGATRVDLDGNPCGVLDEQHVEHARKQLEDAKARVQAQRDQQRAARREAGEGEEGASAP…					MTTQAP-GSLLPLSPEQLARLEAATTDFSTTQMAWLSGYFWGKV-----NHAPGQAVAS---APAQPEAPAITLLSASQTGNARRVAEQLRDDLQAAKLTVNLVNAGDYKFKQIGQEKLLIVVTSTQGEGEPPEEAVALHKFLMSKKAPKM-DGAAFAVLGLGDTSYEFFSKAGKDFDTRLAELGAERLLERVDADVDYAEQASAWRKALTDILKARVPTASPAQAAATVAGSVNEVSTSPYSKTQPLSASLSVNQKITGRDSDKDVRHIEIDLGDSGLRYQPGDALGVWYENDAALVSELLELVWLKGDEPVDVQGQTLPLAEALQKHFELTVNTAQIVAQYATLSRNDELLSLVDDKAKLQQYAQRYPIVDMVRLAPAQLTAEQLTGLLRPLTPRLY…					MSSIRLADLAQQLDAELHGDGDIVISGIASMQSATTGQITFLANSRYREQLALIQASAVVLTEADLEWCKTAALVVKNPYLTYARMAQLLDTTPQPAQNIAPSAVIDPTASLGKNVSVGANAVIESGVELGDDIVIGAGCFVGKQTRIGRGSRLWANVTIYHEIEIGQDCLIQSGTVIGADGFGYANDRGNWVKIPQLGTVIIGDRVEIGACTTIDRGALDNTLIGNGVIIDNQCQIAHNVVIGDNTAVAGGVIMAGSLKIGRYCMIGGASVINGHMEICDKVTVTGMGMVMRPITEPGVYSSGIPLQPNKTWRKTAALVMNIDEISKRLKAIERKVGKDD-MKEKISESIRLDKWLWAARFYKTRALAREMIEGGKVHYNGQRSKPSKIVELQAELTL…
>E_tasmaniensis					>P_cypripedii					>E_pyrifoliae					>P_dispersa					>P_anthophila					>P_conspicua					>T_morbirosei					>P_anthophila					>P_vagans					>T_morbirosei
MNKTRQQLLTRWLKSQSVHGQLWLRLSFLLGILSTLLILAQAWLLATLLQALLVDQQPRNGLLAYFYMLLACFAGRALLAWLREKVGFKTGQAIRQALRKQVLDRLAHLGPAWIQGKPAGSWATLLMEQIEDMQDYYGRYLPQMMLAGAIPLMVLLVLLPVNWVASLMLLATAPLIPLFMAMVGMGAADANRRNFLALSRLSGQFLDRLRGLDTLRLFHRARAETATIASASEQFRLRTMEVLRMAFLSSAVLEFFASISIALIAVYFGFSYLGIFDFGHYNGPVTLFAGFLVLILAPEFYQPLRDLGTFYHAKAQAVGAADVLQTFLEESETAAVQRGELTPRLEDGFSLVATDLTILTADGQQLAGPLNFTLRAGQRVALVGQSGAGKTSLINLLLG…					VNIRRRNRLYVVVAVLVGLGLATALVMYALRSNIDLFYTPSEILYGKGENH-QKPEPGQRLRVGGMVMPGSVKRDPKTLAVSFKLYDANGVVSVSYEGILPDLFREGQGIVAQGVLEDGNLVNAKEVLAKHDEKYTPPEIQDAMKKNHKGPAATYQQA--GAQSMSAFKSKVKKAVIPVAGLGTRMLPATKAIPKEMLPLVDKPLIQYVVNECIAAGINEIVLVTHSSKNAIENHFDTSFELESMLEKRVKRQLLDEIQSICPPHVTIMQVRQGIAKGLGHAVMCAHPLVGDEPVAVILPDVIIDEYESDPTKDNLAEMLSRYEESGRSQIMVEPVADVTAYGVVDCKGADLSPGESAPMVGVVEKPKASEAPSNLAVVGRYVLSADIWPLLAKTPPGA…					--------------------------------MNFLFPLLAVLIWSVNAIVSKLSAAAIDPAAISFYRWLVALLVLAPFALPGVWRHRQQVKQSWWKLLVLGLLGMVMYQSLAYYAAHSVSALFMGIIAALIPLLTVLLSVVVIRLAPTLGILLGSLLSFCGLVWLVSQGNPAQLLTHGLGKGELMMFVASTSYALYGVLTRRWAIP---LPNWQSLWMQIFFGVMLLTPGFLLASDVSLNAHNLPLVLFAAIPA					MQKVVLATGNPGKVRELADLLAAFGLDIVAQTELGVESAEETGLTFIENAILKARHAAQITGLPAIADDSGLAVDALGGAPGIYSARYAGVDASDQQNLDKLLQALEQVPDDERQAQFHCVLVYVRHAADPTPLVFHGSWAGEITRAAAGEGGFGYDPIFYVPALGKTAAELSKDEKRAVSHRGKALTLLLEAMRNAMRTQYSGPADRAHRFAATGL-----TQPSLGGITELRYSEQ-PGIMPLLLLPVLKQLSTQSRWQLWLTPAHKLNRSWMQQSGLPLEKSMHITESERLSTVESMVKALRTGNYSVVLAWIPYELSNEERLELEQAAAEGEALGLIMRPQGRDLALSRQPNSAKIPSDLFHMNKVLLYCRPGFEKECAAEISAKAAEREIYGFP…					MGKPASEFQAVQIAVMTVSDRRDASNDTSGDYLRSAAAEAGHSVVDHAIVPENLYRIRATVSRWIASDDVQVVIVNGGTGFNLKNSTPEALLPLFDREIEGFGELFRMISYEEIGGSTLQSRAIAGLANQTLILAVPGSTSACRTAWERIIADQIDARTAPCNFVSHLKKQ---VGKTVKKQRPVNLDLSTIRFPVTAISSILHRVSGVITLVAIGILLWLLGLSLSSPEGFQHAASIMDGFFAKFIMWGILTALAYHAVSGIRHMLMDFGYLAETLQVGKRSAHITFVITVVLAILAGVLVWMDSLKTLYHAHIATLQQRAQQVLAHNKLDAMLIHSGELLTVFLDDHTYPFKVNPQFKAWVPVTQVPNCWLWIDGVNKPKLWFYSPVDYWHNVEPLP…					MKALNAVAILLAALLLQGCVAVVAGSAAVATKTATDPRTVGTQVDDGTLELRVSNALAKDQQIKSDARVIATAYQGKVLLTGQAPSQEIADRAKQITMGVDGATEVYNEIRIGQKVTLGTSSSDTWITTKIRSQLLGSDQVKSSNVKVTTENGEVFLLGLVTPQEAQAAADVASRVSGVKHVTTAFTMLKMSKKLWIGLFMVLAACFYGLK-P--------------SIISSVA--------PAQA-D------IAALTDAHTVARWVLQHQQLPDYYLTKNDARKRGWNPAKGNLCEVLPGKAIGGDRFANREKRLPQRAGRQWYEADVNYRCGRRDADRLVYSSDGLVFLSTDHYRSFKQVPMFAASQKRVLPGFGISLGSSLLFTCLILLLPISAV…					------------------------------------------------MANNIRIEEDLLGMREVPADAYYGIHTLRAIENFYISSNKISDIPEFVRGMVMVKKAAAMANRDLQTIPRNIADTIIRACDEVLNNGTCMDQFPVDVYQGGAGTSVNMNTNEVLANIGLELMGHNKGEYQYLNPNDHVNMCQSTNDAYPTGFRIAVYNSLLKLVDAINSLADGFQRKSEEFKTILKMGRTQLQDAVPMTLGQEFNAF					-MSSRQRLSVVMIAKNEAELLPDCLASVSWADEIIVLDSGSHDNSADIATQAGAKVYHSDDWQGYGIQRQRAQHYATGDMILMIDADERVTPELRAAIEQVLIAP-PGRTIYSLGRSNLFLGRFMRHSGWYPDRVMRLYPRTFRYNDNLVHESLQRDGAPVVALPGDLQHLTCRDLIAFQRKQLAYAEAWATERHQRGKRCGLFSLFGHTLGAFVKTLLLRAGFLDGKQGWILAVVNAQYTFNKYAALWALN---					MTTQAP-GSLLPLSPEQLARLQAATTDYSPTQLAWLSGYFWGRV-----EQTPGSAVASSAPSAPAAETPVITLLSASQTGNARRLAEQLRDDLLAAKLNVNLVNAGDYKFKQIGQEKMLVVVTSTQGEGEPPEEAVALHKFLMSKKAPKM-EGAAFAVFGLGDTSYEFFSQAGKDFDNRLAELGGERLLDRVDADVEYAEQASAWRSALTDILKQRVPTESPAQAAATAAGSVNEVTTSPYSKESPLSASLAVNQKITGRDSDKDVRHIEIDLGDSGLRYQPGDALGVWYENDAALVSELLELVWLKGDEPVEIQGKTLPLAEALQKHFELTVNTAQIVAQYAQLSRNAELLALVDDKARLQHYAQNYPIVDMVRLAPAELTAEQLTGLLRPLTPRLY…					MSSIRLADLAQQLDAELHGDGDIAISGIASMQSAVPGNITFLANSRYREQLAHCKADAVVLTEADLEWCHSAALVVKDPYLTYARMAQILDTTPSPAENIAPGAVISPAAKLGANVSIGANAVIESGVELGDNVVIGAGCFIGKNTRIGAGTKLWANVSVYHEVLIGEQCLIQSGTVIGADGFGYANDRGNWVKIPQLGSVVIGDRVEIGACTTIDRGALDNTQIGNGVIIDNQCQIAHNVIIGDNTAVAGGVIMAGSLKIGRYCMIGGASVINGHMEICDKVTVTGMGMVMRPITEPGVYSSGIPLQANKVWRKTAALVMNIDDMSKRLKAIERKVGKENMKPQDPGQDVRLDKWLWAARFYKTRAIAREMIEGGKVHYNGQRAKPGKHVEMDAQLIL…
>P_sp_At-9b					>P_sp_aB					>E_billingiae					>P_sp_At-9b					>P_rwandensis					>P_cypripedii					>P_cypripedii					>P_cypripedii					>T_ptyseos					>P_eucrina
MNKSRQQELIRWLRQQRHHGARSLRLVSLLGFASALVIIAQAWLLASLLQALIITHQPRAELLTPFSLLLLCFVLRAVLNYGREMAGQRAGMAIRRALRQQVLDRLNTLGPAWIQGKPAGSWATLLLEQIEEMQDYYARYLPQMSLAVFIPCAILVAIFPINWAAGLILLATAPLIPFFMAMVGMGAADANRRNFLALARLSGDFYDRLRGRETLRLFDRASAEQQAITRSTTDFRQRTMEVLRLAFLSSAVLEFFASLAIAVVAVYFGFSYLGELNFGHYHSGVTLFAGFLALILAPEFFQPLRDLGTFYHAKAQAVGGADALDRFLQESPDVQAGESGESCAFSAPLQLQAHDLVVMTAKGEPLSQPLTFSLSAGKRVALVGQSGAGKTALMNVLLG…					VNIRRRNRLYAALAILLGLGLATALVMYALRSNIDLFYTPGEILYGKGEAH-EKPEAGQRLRVGGMVMPGSVRRDPKTLAVSFKLYDARGVVSVSFEGILPDLFREGQGVVAQGVLAAGNQVIAKEVLAKHDEKYTPPEIENAMKSDQTGPQSRYQVG--NKSSMSANNTKVKKAVIPVAGLGTRMLPATKAIPKEMLPLVDKPLIQYVVNECIAAGINEIVLVTHSSKNAIENHFDTSFELESMLEKRVKRQLLDEIQSICPPHVTIMQVRQGIAKGLGHAVMCAHPLIGDEPFAVILPDVIIDEYESNPTKDNLAEMLSRYEESGRSQIMVEPVADVTAYGVVDCQGAELNPGDSAPMVGVVEKPKASESPSNLAVVGRYVLSSEIWPLLAKTPPGA…					--------------------------------MNFLFPLLAVLIWSVNAIVSKVSAGAIDPAAISFYRWLLALLTLTPFVLPSVWRNRQQILKVWWKLLVLGLLGMVLYQSLAYYAAHSVTALFMGILNALIPLLTVLISIVLLRVAPTVGIVIGSLLSFGGLVWLVSQGHPQQLLSHGMGQGELMMFAASTSYALYGVLTKRWAIP---LPNWQSLYVQIAFGVLMLLPNFLMAKDVSLNLHNIPLVLFAGLFA					MQKVVLATGNPGKVRELADLLAAFGLDIVAQTELGVESAEETGLTFIENAILKARHAAQITGLPAIADDSGLAVDALGGAPGIYSARYAGLDASDQQNLDKLLIALENVPEGERQAQFHCVLVYVRHAADPTPLVFHGSWAGEITRAAAGEGGFGYDPIFYVPELGKTAAELSKDEKRAVSHRGKALTLLLDAMRNAMRTQFSGTADRSHRFATSDV-----AQPSLGGITELRYSEQ-PGMMQLLLLPVLKQLSLQSRWQLWLTPAHKLNRHWMQQSGLPLDKSMHITECERYSTVESMVKALRTGNYSVVLAWIPYELNDDERRELKLAAAEGEALGLIMRPQGHEGVLSRQSSASKIPSDLFHMNKVLLYCRPGFEKECAAEISAKAAEREIYGFP…					MGKPTGEFVALNVAVMTVSDSRDASNDSSGDYLREALAEAGHQVVDRAIVPDNRYRIRATVSRWIASEDVQVVIINGGTGFNSKNSTPEALLPLFDREIDGFGELFRMFSYEEIGSSTLQSRAVAGLANQTLIFAVPGSTNACRSAWERIIEEQLDARTRPCNFVSHLKKL-------------------------------------VITFVALGILLWLLGLSLSSPEGFQQAASIMDSFFAKFIMWGILTALAYHVVGGIRHMLADFGFMEETLQVGTRSAQAAFGITVVLSILAGVLVWMDSLKTLYHAHINTLQQRAQQVLARFKLDAMLIHSGELLTVFLDDHDYPFKVNPQFKAWVPVTQVPNCWLWIDGVNKPKLWFYSPVDYWHNVEPLP…					MKALNAVAILLTAMMLQGCVAVVAGGAAVATKTATDPRTVGTQVDDGTLELRVTNALAKDAQIKNQARVVVTAYQGKVLLTGQSPSADLSNRAKQIAMGVDGATEVYNEIRTGQKVSLGTSSSDTWITTKIRSQLLGSDQVKSSNVKVTTENGEVFLLGLVTQQEATAAADLASRVSGVKHVTTAFTILKMSKKLWIGLIIALVASWAGLK-P--------------HFSAAPK------------TD------IAQQTDAETVARWLQQHHKLPDLYITKSEARRQGWNPAKGNLCDVLPGRAIGGDRFGNREQRLPQQAGRQWYEADVNYDCGHRDADRLLYSSDGLIFLTTDHYRSFKPVPMFASTQKRVLPGFGISLGTSLLFTCLILLLPISAL…					------------------------------------------------MANNIRIEEDLLGMREVPADAYYGVHTLRAIENFYISNSKISDIPEFVRGMVMVKKAAALANKELQTIPRNIANTIIQACDEVLNNGKCMDQFPVDVYQGGAGTSVNMNTNEVLANIGLELMGHHKGDYQYLNPNDHVNKCQSTNDAYPTGFRIAVYTSILKLIDAINQLGEGFQRKAVEFENILKMGRTQLQDAVPMTLGQEFHAF					-----------MIAKNEAALLPEALASVSWADEIIVLDSGSHDATADVASQHGAQVYQAEAWAGFGKQRQRAQAKASGDMILMIDADERVTAPLRNAIEQVLQQP-PANTVYSLSRSNLFLGRYMRHSGWYPDRVMRLYPRHLSYNDNLVHESLETQGAPVVVLPGDLQHLTCRDLVAFQRKQLNYAEAWAQERFQRGKRCGLFSIFSHTLGAFLKTLLLRAGFLDGKQGWILAVVNAQYTFNKYSALWALH---					MTNKAP---QLPLSAEQLAQLQAATQDFSVTQMAWLSGYFWGRLSGD--TPVAATTASSAGTSPQAAPAPTVTILSASQTGNARRLAEQLRDDLLATGVVVSLVNAGDYKFKQIAQEKWLLVVTSTQGEGEPPEEAVALHKYLMSKKAPEM-KSTAFAVFGLGDSSYEFFCQAGKDFDQRLADLGAERLLTRGDADVDYQATADQWRQEIVALLQQRLPAVSDAAVSQAASGASDEIDSTPYTKEQPLVASLAVNQKITGNDSQKDIRHLEIDLGNSGLRYQPGDALGVWFDNDPQLVEELLGLLWLDGKQEVSVAGQSLPLATALQQHFELTVNTPQIVEKYAHLSGHSELLSMAGDKAALQAYAQRWPIVDMVRHAPVELRAEQLTDLLRPLTPRLY…					MSSIRLADLAQQLDAELHGDGDIVISGIASMQSATPGQITFLANSRYREQLASVQASAVVLTEADLEWCNTAALVVKNPYLTYARMAQLLDTTPQPAQNIAPSAVIDPSASLGQNVSVGANAVIESGVELGDNVVIGAGCFVGKKSRIGSGTRLWANVTIYHEIQIGQDCLIQSGTVIGADGFGYANDRGNWVKIPQLGTVIIGDRTEIGACTTIDRGALDNTLIGNGVIIDNQCQIAHNVVIGDNTAVAGGVIMAGSLKIGRYCMIGGASVINGHMEICDKVTVTGMGMVMRPITEPGVYSSGIPLQPNKAWRKTAALVMNIDDISKRLKAIERKVDKNS-MKEKISDGVRLDKWLWAARFYKTRALAREMIEGGKVHYNGQRSKPSKLVESGAELTL…
>P_deleyi					>P_conspicua					>P_sp_At-9b					>P_sp_A4					>E_billingiae					>P_anthophila					>P_vagans					>P_eucrina					>P_brenneri					>T_sp_NML_06
MDKSRQQHLTRWLRQQRRFAGRWLRLNTLLGMASALLIIAQSALLASLLQALIIDGQPRESLTFSIMSLLLCFVLRALINYARELTGFRAGQAIRQALRQQVLDRLAELGPAWIQGKPAGSWATLLLEQIEEMQEYYARYLPQMTLAALIPCCILLTVFPLNWTAGLILLATAPLIPLFMALVGMGAAEANRRNFLVLARLSGNFLDRLRGRETLRLFNRGAAEQAAVATATTDFRQRTMEVLRLAFLSSAVLEFFASLAIAVVAVYFGFSYLGELHFGDYGQGVTLFAGFLVLILAPEFFQPLRDLGAFYHAKAQAVGGADALEAFMQATPDAAPQEGQQPFTASGAVQVIATDLRVCAPDGQLLCGPLTFTIAPGEQVALVGQSGAGKTALMNALLG…					VNIRRRNRLYGVLAILVGLSLATALVMYALRSNIDLFYTPSEILYGKGEAH-EIPEPGQRLRVGGMVMPGSVKRDPKTLAVSFKLYDANGVVSVSFEGILPDLFREGQGVVAQGVLETGNRITAKEVLAKHDEKYTPPEIEDAMKKNHNGPQSLYQPG--KQSSMSAYKSKVKKAVIPVAGLGTRMLPATKAIPKEMLPLVDKPLIQYVVNECIAAGINEIVLVTHSSKNAIENHFDTSFELESMLEKRVKRQLLDEIQSICPPHVTIMQVRQGIAKGLGHAVMCAHPLIGDEPFAVILPDVIIDEYESNPTKDNLAEMLSRYEESGRSQIMVEPVADVTAYGVVDCQGAELNPGDSAPMVGVVEKPKATEAPSNLAVVGRYVLSSDIWPLLAKTPPGA…					--------------------------------MNFLFPLVAVLIWSINTIVSKLSAGSIDPAAISFYRWILALVVLTPFALPGVWRHRRQIVASSGRLLILGLLGMVLYQSLAYYAAHSVSAVMMGILGATIPLLTILLSLVVLRLAPTRGILFGGLLSFAGLVWLVSAGNPAQLLDQRLGNGELMMLAASTSYALYGVLTKRWAIP---LPTWQSLYVQIVFGVLLLLPGFLRAPDVSLNTHNIPLVLFAGLFA					MQKVVLATGNPGKVRELADLLSAFGLDIVAQTDLGVESAEETGLTFIENAILKARHAAQQTGLPAIADDSGLAVDALGGAPGIYSARYAGEDASDEQNLLKLLDALETVPDGERQAQFHCVLVYVRHAADPTPLVFHGSWEGEIARTPAGSDGFGYDPVFYVPALGKSAAELTKDEKRAVSHRGKALTLLLDAMRNAMRTQHITASGFRTHFSSTSA-----PQS-GGGITELRCSEQ-LGMLQMLLLPLLQQLSQQSRWQLWLTPAHKLNRAWLQQSGLPLEKSMHIADSDRYNAVEAMIKALKTGNYSVVVAWVPYDLNEQERQALEKAAAEGEAMGLILRASEPQDALQRPKNGLKIQSDLFHMNKVLLYCRPGFEKECAAEITAKATEREVFGFA…					MGKPSAEFMPLNVAVLTVSDSRDATSDSSGDYLREALAEAGHQVLDHALVKDDRYRIRAVVSSWIASSDVQVVLINGGTGFNTKNCTPEALLPLFDREIEGFGELFRMISYEDIGTSTLQSRAVAGVANGTVIFAVPGSTNACQSAWERIIQDQLDARTRPCNFVSHVKKP---VGKTVKKQRPVNLDLSTIRFPVTAIASILHRVSGVITFVAVGILLWLLGLSLSSPEGFLQASAVMGSFFVKFIMWGILTALAYHIVGGIRHMLMDFGYLGETLQIGTRSAQISFGITVVLSILAGVLVWMESLVTLYQDHLKTLQARAQQVLARSKLDAMLIHSGELLTVFLDDHTYPFKVNPQFKAWVPVTSVPNCWLWVDGVNKPKLWFYSPVDYWHNVEPLP…					MKALNAIAILLTAMLLQGCVAVVAGGAAVATKTATDPRTVGTQVDDGTLELRVTNALAKDQQIKTDARVIATAYQGKVLLTGQAPSQEIANRAKQITMGVDGATEVYNEIRIGQKVTLGTTSSDTWITTKIRSQLLGSDQVKSSNVKVTTENGEVFLLGLVTQQEGQAAADIASRVSGVKHVTTAFTLLKMSKKLWIGLFFVLAACFYGLK-P--------------YLNTVSA--------PAQA-D------IATLTDAHTVARWVLQHQQLPDYYLTKNEARQRGWNPAKGNLCEVLPGRAIGGDRFANREKRLPPRAGRQWYEADVNYRCGHRDADRLVYSSDGLVFLSTDHYRSFRQVPMFAASHKRVLPGFGLSLGTSLLFTCLILLLPISAV…					------------------------------------------------MANNIRIEEDLLGMREVPADAYYGVHTLRAIENFYISNSKISDIPEFVRGMVMVKKAAAMANKELQTIPRNIADTIIKACDEVLNNGRCMDQFPVDVYQGGAGTSVNMNTNEVLANIGLELMGHQKGEYQYLNPNDHVNKCQSTNDAYPTGFRIAVYSSLLKLLDGISQLAEGFQHKADEFQTILKMGRTQLQDAVPMTLGQEFHAF					-----------MIARNEAELLPDALASVAWADEIILLDSGSSDATAEIARAQGAQVYEALPWAGYGKQRQRAQAFATGEMILMLDADERVTPALRRSIEQVLCQP-PSATVYSLSRSNFFLGRFMRHSGWYPDRVMRLYPRHLSYNDNLVHESLETQGAPVVALPGDLAHLTCRDLITFQRKQMNYAEAWAQERFQRGKRCGLFAIFSHTLGAFAKTLLLRAGFLDGKQGWILAVVNAQYTFNKYAALWALH---					MTTQAP-GSLLPLSPEQLARLQAATTDYSPTQLAWLSGYFWGRV-----EQTPGNAVASAP-APAAAEAPAITLLSASQTGNARRLAEQLRDDLQAARLNVNLVNAGDYKFKQIGQEKLLVVVTSTQGEGEPPEEAVALHKFLMSKKAPKM-DGTAFAVFGLGDTSYEFFSKAGKDFDSRLAELGAERLLDRVDADVEYADQATAWRSALTEILKQRVPTESPTQAAATAAGSVNEVTTSPYTKEAPLSATLAVNQKITGRDSDKDVRHIEIDLGESGLRYQPGDALGVWYENDSALVSELLELVWLKGDEPVEVQGATLPLAEALQKHFELTVNTAQIVAQYAQLSRDAELLALVDDKARLQQYAQRYPIVDMIRLAPAELSAAQLTSLLRPLTPRLY…					MASFLLADLARQLDAELHGDGDIAISGIASMQSATRGNITFLANSRYREQLAHCNADAVVLTEADLAYCSTAALVVKDPYLSYARLAQILDTTPQPATDIAPSAVLSPEATIGDKVSIGANAVIESGVVLGDNVVIGAGCFIGKNTRIGAGTRLWANVSVYHEIVIGEKCLIQSGTVIGADGFGYANDRGNWVKIPQLGTVVIGDRVEIGACTTIDRGALDNTQIGNGVIIDNQCQIAHNVIIGDNTAVAGGVIMAGSLKIGRYCMIGGASVINGHMEICDKVTVTGMGMVMRPITEPGVYSSGIPLQANKAWRKTAALVMNIDDINKRLKAVERKAGKDNMKEPSAHQDVRLDKWLWAARFYKTRALAREMIEGGKVHYNGQRSKPGKHVELDAELIL…
>P_rwandensis					>P_rwandensis					>P_eucrina					>P_sp_GM01					>E_tasmaniensis					>P_s_indologenes					>E_pyrifoliae					>P_allii					>P_ananatis					>P_ananatis
MEKSRQQHILRWLRQQRQHGTRGLRAASLLGFAGALVIIAQAWILASLLQSLIVAQQPRGTLLYEFLLLLLCFILRAGLNYAREMAGYRAGVAIRRALRQQVLDRLNALGPAWIQGKPAGSWATLLLEQIEEMQEYYARYLPQMSLAVFIPFAILIAIFPINWAAGLILLATAPLIPLFMAMVGMGAAEANRRNFVALARLSGDFYDRLRGRETLRLFHRAKAEQQAIAESTTDFRERTMEVLRLAFLSSAVLEFFASLAIAVVAVYFGFSYLGELNFGHYGSGVTLFAGFLALILAPEFFQPLRDLGTFYHAKAQAVGGADALERFLTESPDSVISNGSAAVTFATPITLQARDLIVLTAKGEALSQPLNFTLAAGQRVALVGQSGAGKTALMNVLLG…					VNIRRRNRLYVVVAILVGLGLATTLVMYALRSNIDLFYTPSEILYGKGEAH-QMPETGQRLRVGGMVMPGSVKRDPKTLAVSFKLYDANGVISVSYEGILPDLFREGQGVVAQGVLEDGNLVNAKEVLAKHDEKYTPPEIEDAMKQNHKGPAAAYQQA--GAQSMSAYKSKVKKAVIPVAGLGTRMLPATKAIPKEMLPLVDKPLIQYVVNECIAAGINEIVLVTHSSKNAIENHFDTSFELESMLEKRVKRQLLDEIQSICPPHVTIMQVRQGIAKGLGHAVMCAHPLIGDEPFAVILPDVIIDEYESNPTKDNLAEMLTRYEETGRSQIMVEPVADVTAYGVVDCQGADLAPGQSAPMVGVVEKPKAAEAPSNLAVVGRYVLSPDIWPLLAKTPPGA…					--------------------------------MNLLFPLIAVLIWSVNTIVSKLSADAIDPAAISFYRWLLALLVLTPFCLPGVWRHRRTIKGHLGQLLLLGLLGMVLYQSLAYYAAHSVSAVMMGILGATIPLLTILLSLLVLRLAPTRGILLGGILSFIGLVWLVSGGNPAQLLAQRPGNGEVMMLAASTSYALYGVLTKRWAIP---LPTWQSSMCR-----------------------------FSSVLC					MQKVVLATGNPGKVRELADLLAAFGLDIVAQTELGVESAEETGLTFIENAILKARHAADITGLPAIADDSGLAVDALGGAPGIYSARYAGVDASDQQNLEKLLVALENVPEGKRQAQFHCVLVYVRHAADPTPLVFHGSWTGEITRSAAGEGGFGYDPIFYVPELGKTAAELSKDEKRAVSHRGKALTLLLEAMRNAMRTHFSGPADRSHRYASSSL-----AKPSLGGITELRSSEQ-PGMMQLMLLPVLKQLSEQSRWQLWLTPAHKLNRSWMQQSGLPLEKSMHITESERFNTVESMVKALRTGNYSVVLAWIPYELSDEERLELEQAAAEGEALGLILRPQGHQYALSRQPKAAKIPSDLFHMNKVLLYCRPGFEKECAAEISAKAAEREIYGFP…					MGNSSSDFIPLNVAVLTVSDRHSVDSDSSGSYLHEALTEAGHQVLDRAIVPDNRYRIRAVVSSWIASRDVQVVLINGGTGFNDKNCTPEAIGPLFDREVEGFGELFRMISWEDIATSTVQSRALAGIANGTLIFAVPGSTGACQLAWERIIQPQLDARTRPCHFVSHLKKP---VGKTVKKQRPVNLDLSTIRFPLTAIASILHRVSGVITFVSIGILLWLLGLSLSSPEGFLQASAVMDSFIAKFIMWGILTALAYHIAGGIRHMMMDFGLLGETLETGKFSAQIAFGITVVLSILAGVLVWMESLVTLYQEHIKTLQQRAQQVLARHSLDAMLIHSGELLTVFLDDHTYPFKVNPQFKAWVPVTQVPNCWLWIDGVNKPKLWFYSPVDYWHDVEPLP…					MKALNAVAIVLTAMLLQGCVAVVAGSAAVATKTATDPRSVGTQVDDGTLELRVSNALAKDQQIKTDARVIATAYQGKVLLTGQAPNQEVANRAKQIAMGVDGATEVYNEIRIGPKVSLGTSSADTWITTKIRSQLLGSDQVKSSSVKVTTENGEVFLLGLVTPEEAKAAADIASRVSGVKHVTTAFTMVKMSKKLWLGLVLILILSWIGLR-P--------------YLTSAPA--------KTSAAD------IAALTDVRTVARWVLQHQQLPDYYITKKQARRLGWNPAKGNLCDVLPGRAIGGDRFSNRERKLPERSDRQWYEADVNYRCCHREADRLVYSSDGLVFLSTDHYRSFKPVQMFAASQKRVLPGFGLSLGTSLLFTCLILLLPISAL…					------------------------------------------------MVNNIRIEEDLLGMREVPADAYYGVHTLRAIENFYISNSKISDIPEFVRGMVMVKKAAALANKELQTIPRNVANAIISACDEVLNNGKCMDQFPIDVYQGGAGTSVNMNTNEVLANIGLEIMGHQKGEYQFLNPNDHVNKCQSTNDAYPTGFRIAVYSSILKLLDAIGQLSEGFQRKAVEFNTILKMGRTQLQDAVPMTLGQEFHAF					MTSTRQRLSVVMIAKNEAELLPDCLASVHWADEIIVLDSGSTDNTIALAREAGAQVYQATEWQGYGKQRQRAQSFARCDMILMIDADERVTPALRRAIEQVLDAP-PGRTVYSLSRSNLFLGRFMRHSGWYPDRVMRLYPRTLRYNDNLVHESLNTEGAPVKVLNGDLQHLTCRDLMAFQRKQLAYAEAWAQERFLRGKACSLFSVFSHTLGAFIKTLLLRAGFLDGKQGWLLAVVNAQYTFNKYAALWALN---NASAKGRT--MENQPKLNSSKEVISFLAERFPHCFSAEGEARPLKIGIFQDLVERVQGEMNLSKTQLRSALRLYTSSWRYLYGIKAGATRVDLDGNPCGVLDEQHVEHARKQLEDAKARVQAQRDQQRAARREAGEGEEGASAP…					MTTQAP-GSMLPLSPEQLARLQAATTDFSTTQMAWLSGYFWGMV-----NQTPGQAVAS---APAQAETPAITLLSASQTGNARRVAEQLRDDLQAAKLTVNLVNAGDFKFKQIGQEKILIVVTSTQGEGEPPEEAVALHKFLMSKKAPKM-DGAAFAVFGLGDTSYEFFSKAGKDFDSRLAELGAERLLDRVDADVEYAEQASAWRAAITAALKERVPAASPAQSAATVAGSVNEVFTSPYTKEQPLSASLAVNQKITGRDSDKDVRHIEIDLGDSGLRYQPGDALGVWYENDAALVNELLELVWLKGDEPVEVQGQTLPLAEALQKHFELTVNTAQIVAQYASLARNDELLSLVDDKAKLQQYAQRYPIVDMVRLAPAQLSAEQLSGLLRPLTPRLY…					MSSIRLADLAQQLDAELHGDGDIVISGIASMQSATTGQITFLANSRYREQLALIQASAVVLTEADLEWCKTAALVVKNPYLTYARMAQLLDTTPQPAQHIAPSAVIDSSARLGENVSIGANAVIESDVVLGDNVVIGPGCFVGKKTRIGNGSRLWANVSVYHEVQIGQDCLIQSGTVIGSDGFGYANDRGNWVKIPQLGSVIIGDRVEIGACTTIDRGALDNTLIGNGVIIDNQCQIAHNVVIGDNTAVAGGVIMAGSLKIGRYCMIGGASVINGHMEICDKVTVTGMGMVMRPITEPGVYSSGIPLQPNKTWRKTAALVMNIDELSKRLKAIERKVGKDD-MKEKPDEGVRLDKWLWAARFYKTRSIAREMIEGGKVHYNGQRSKPSKLVERDAELTL…
>P_sp_GM01					>P_s_indologenes					>P_s_indologenes					>P_sp_aB					>P_rodasii					>P_wallisii					>E_billingiae					>P_agglomerans					>P_sp_At-9b					>P_allii
MNKSRQQELLRWLRQQRHHGASSLRAASLLGFAGALVIIAQAWLLASLLQNLIVAQQPRSALLNDFLLLLLCFVLRAGLHYAREMAGHRAGVAIRRALRQQVLDRLNELGPAWIQGKPAGSWATLLLEQIEDMQEYYARYLPQMTLAAFIPLAILLAIFPVNWAAGLILLVTAPLIPLFMAMVGMGAADANRRNFLALARLSGDFYDRLRGRETLRLFHRAAAEQQAIAASTTDFRQRTMEVLRLAFLSSAVLEFFASLAIAVVAVYFGFSYLGELNFGHYGTGVTLFAGFLALILAPEFFQPLRDLGTFYHAKAQAIGGADALDQFLRESPDLAADQCSAALTVTATLTIQAKDLVVTTASGEALSQPLNFTLEAGKRVALVGQSGAGKTALVNVLLG…					VNIRRRNRLYVVVAILTGLGLATALVMYALRSNIDLFYTPGEILEGKGDAH-IRPEPGQRLRVGGVVMPGSVTRDPRTLAVSFQLYDGRGVVSVNFVGILPDLFREGQGVVAQGVLEPGNLINAKEVLAKHDENYTPPEITAAMKPAPPVQQAATHPA--GQTPMSAYKTKVKKAVIPVAGLGTRMLPATKAIPKEMLPLVDKPLIQYVVNECIAAGINEIVLVTHSSKNAIENHFDTSFELESMLEKRVKRQLLDEIQSICPPHVTIMQVRQGIAKGLGHAVMCAHPLVGDEPVAVILPDVIIDEYESNPTKDNLAEMLSRYEESGRSQIMVEPVSDVTAYGVVDCKGAELNPGDSAPMVGVVEKPKASEAPSNLAVVGRYVLSADIWPLLAKTPPGA…					--------------------------------MVFLFPLFAVLIWSVNAIVNKLSAGAIEPAAISFYRWLLALLVLTPFVLPGVLRQWQTIRPHLGRLMILGLLGMALYQSLAYYAAHSVSALFMGIIAALIPLLTVLLSVLILRIAPTVGILAGSLISFCGLIWLVSEGNPDQLLHHGIGTGEALMLAASACYALYGVMTKRWSIP---LPVWQSLYVQIAAGVMLLLPGFLMTPDVSLTPRNLPLVAFAGLFA					MQKVVLATGNPGKVRELAELLSAFGLDIVAQTDLGVESADETGLTFIENAILKARHAAQITGLPAIADDSGLAVDALGGAPGIYSARYAGEEASDQQNLEKLLQALENVPDGQRQAQFHCVLVYLRHAEDPTPLVFHGSWQGEITRSASGTGGFGYDPIFFVPALGKTAAELSKAEKGAASHRGKALTLLLEAMRNAMRTQHPNNARYAHHYASSSV-----PSTQGGGITELRYSEQ-PGMMQMMLLPLLQQLSQQSRWQLWLTPAHKLNRTWLQESGLPLDKSMHIADSERLNAVEAMVKALRTGNYSVVLAWIPYDLDENERRQLENAAAEGEALGLILRASGTTEAPLRPQSAIKIQSDLFHMNKVLLYCRPGFEKECAAEISAKAAEREIYGFP…					MGKPTGEFVALNVAVMTVSDSRDASNDSSGDYLREALAEAGHQVVDRAIVPDNRYRIRATVSRWIASDDVQVVIVNGGTGFNSKNSTPEALLPLFDREIDGFGELFRMVSYEEIGSSTLQSRAVAGLANQTLIFAVPGSTNACRSGWERIIEEQLDARTRPCNFVSHLKKL-------------------------------------VITFVALGILLWLLGLSLSSPEGFQQAASIMDSFFAKFIMWGILTALAYHVVGGIRHMLADFGFMEETLQVGTRSAQAAFGITVVLSILAGVLVWMDSLKTLYHAHINTLQQRAQQVLARYKLDAMLIHSGELLTVFLDDHDYPFKVNPQFKAWVPVTQVPNCWLWIDGVNKPKLWFYSPVDYWHNVEPLP…					MKALNAIAILCTALLLQGCVAVVAGGAAVATKTATDPRTVGTQVDDGTLELRVTNALAKDEQLKSQARVVVTAYQGKVLLTGQSPSADLASRAKQIAMGVDGATEVYNEIRTGQKVSLGTSSSDTWITTKIRSQLLGSDQVKSSNVKVTTENGEVFLLGLVTQQEATAAADIASRVSGVKHVTTAFTLLKMSKKLWIGLLLALVVSWVGLK-P--------------HLTAQ----------RGQPAD------IAQRTEAKTVARALQ--HRLPDLYLTKSEARRQGWNPGKGNLCEVLPGRAIGGDRFSNREKRLPMQAGRQWYEADVNYDCGHRDADRLLYSSDGLIFLTRDHYRSFQQVHMFASAQKRVLPGFGLSLGTSLLFTCLILLLPISAL…					------------------------------------------------MTNSIRIEEDLLGMREVPADAYYGVHTLRAIENFYISNSKISDIPEFVRGMVMVKKAAAMANKELQTIPRHIANTIIQACDEVLNNGKCMDQFPIDVYQGGAGTSVNMNTNEVLANIGLELMGHQKGDYQFLNPNDHVNKCQSTNDAYPTGFRIAVYTSILKLLDAIGQLSEGFQRKAVEFETILKMGRTQLQDAVPMTLGQEFHAY					-MSARQRLSVVMIAKNEAELLPECLASVSWADEIIVLDSGSHDNSVEIATQAGAKVYLNDDWQGYGIQRQRAQHYATGDMILMIDADERVTPELRAAIEQVLVAP-PSRTVYSLGRSNLFLGRFMRHSGWYPDRVMRLYPRTFRYNDNLVHESLQSDGAPVVALPGDLQHLTCRDLIAFQRKQLAYAEAWATERHRRGKRCSLFSLFSHTLGAFMKTLLLRAGFLDGKQGWILAVVNAQYTFNKYSALWALN---					MTTQAPPGSLLPLTPEQLARLQAATTDFSTTQMAWLSGYFWGMV-----NQTPGAVATP---APVQAEVPTILLISASQTGNARRLAEQLRDDLLAAKLNVNLVNAGDYKFKQIGQEKLLVVVTSTQGEGEPPEEAVALHKFLMSKKAPSL-KGAAFAVFGLGDTSYEFFSKAGKDFDSRLAELGAERLLDRVDADVEYADQASAWRKQITDILQSRVPSGSPAPLAATAAGSVNEIHSSPYSKEAPLTASFAVNQKITGRDSDKDVRHIEIDLGDSGLRYQPGDALGVWFENDPLLVKELLELLWLKGDEPVAIHGETLPLAEALQRHFELTVNTPQIVEQYAALSRNDALLALVGDKPQLQHYAQSLPIVDMVRQAPTELNAEQLTSLLRPLTPRLY…					MSSIRLADLAQQLDAELHGDGDIVISGIASMQSATSGQITFLANSRYREQLALIQASAVVLTEADLEWCKTAALVVKDPYLTYARMAQLLDTTPQPAQHIAPSAVIDSSARLGENVSVGANAVIESDVELGDNVVIGAGCFVGKKTRIGKGSRLWANVSVYHEVQIGQDCLIQSGTVIGSDGFGYANDRGNWVKIPQLGSVVIGDRVEIGACTTIDRGALDNTLIGNGVIIDNQCQIAHNVVIGDNTAVAGGVIMAGSLKIGRYCMIGGASVINGHMEICDKVTVTGMGMVMRPITEPGVYSSGIPLQPNKTWRKTAALVMNIDEISKRLKAIERKVGKDD-MKEKPSEGVRLDKWLWAARFYKTRSIAREMIEGGKVHYNGQRSKPSKLVERDAELTL…
>P_agglomerans					>P_s_stewartii					>P_anthophila					>P_deleyi					>P_cypripedii					>P_sp_At-9b					>P_allii					>E_pyrifoliae					>E_billingiae					>P_conspicua
MDKSRQQHLTRWLRQQRHFAGRWLRLNTLLGMASALLIIAQAGLLASLLQALIVDQQPRESLTVSILLLLLCFVLRALINYARELTGYRAGQAIRQALRQQVLDRLSDLGPAWIQGKPAGSWATLLLEQIEEMQEYYARYLPQMTLAVLIPCCILLTIFPLNWTAGLILFATAPLIPLFMALVGMGAAEANRRNFLVLARLSGNFLDRLRGRETLRLFHRGAAEQEAVAAATTDFRQRTMEVLRLAFLSSAVLEFFASLAIAVVAVYFGFSYLGELHFGDYGQGVTLFAGFLVLILAPEFFQPLRDLGAFYHAKAQAVGGADALEAFMQATPATAPQEGQLPFTADRSIALTAEDLRVCAPDGQVLCGPLSFTVVPGEQIALVGQSGAGKTALMNALLG…					VNTRRRNRLYVVVAILTGLGLATALVMYALRSNIDLFYTPGEILEGKGDAH-IRPEPGQRLRVGGVVMPGSVTRDPRTLAVSFQLYDGRGVVSVNFVGILPDLFREGQGVVAQGVLEPGNLINAKEVLAKHDENYTPPEITAAMKPAPPVQQAATHPA--GQTPMSAYKTKVKKAVIPVAGLGTRMLPATKAIPKEMLPLVDKPLIQYVVNECIAAGINEIVLVTHSSKNAIENHFDTSFELESMLEKRVKRQLLDEIQSICPPHVTIMQVRQGIAKGLGHAVMCAHPLVGDEPVAVILPDVIIDEYESNPTKDNLAEMLSRYEESGRSQIMVEPVSDVTAYGVVDCKGAELNPGDSAPMVGVVEKPKASEAPSNLAVVGRYVLSADIWPLLAKTPPGA…					--------------------------------MFFLYPLGAVMIWSINAIVSKLSASAIDPAAISFYRWLLALLVLTPFVLPGVWRARQAIKPHLWRLAILGLLGMVLYQSLAYFAAHSVSALFMGIIGALIPLLTVLLSVVILRIAPTSGILFGSILSFGGLVWLVSEGNVMQLLHHGLGKGELMMLAASTAYALYGVLTKRWALP---LPIWHSLYVQILAGVLMLLPGFLLAPDVSLDRHNLPLVMFAGLFA					MQKVVLATGNPGKVRELAELLSAFGLDIVAQSDLGVESAEETGLTFIENAILKARHAAQITGLPAIADDSGLAVDALGGAPGIYSARYAGEDASDQQNLEKLLQALENVPDGQRQAQFHCVLVYLRHAEDPTPLVFHGSWAGEITRSASGNGGFGYDPIFAVPALGKTAAELSKAEKGAVSHRGKALTLLLEAMRNA--------------------------------------------MMQMLLLPLLQQLSQQSRWQLWLTPAHKLNRSWLQASGLPLDKSMHIADSERLNAVEAMVKALRTGNYSVVLAWIPYELDEDERRQLENAAAEGEAMGLILRASGSPEAPLRPQSAIKIQSDLFHMNKVLLYCRPGFEKECAAEISARAAEREIYGFP…					MGKSSGDFVAINAAVLTVSDSRDASNDTSGDYLREALTEAGHQVVDHAIVPDNRYRIRATVSRWIASEDVQLVIVNGGTGFNSKNSTPEALLPLFDREIEGFGELFRMISYEEIGSATLQSRAVAGMANQTLIFAVPGSSNACRSAWERIIIDQLDARTRPCNFVSHLKKL-------------------------------------VITFVALGILLWLLGLSLSSPEGFLQAASIMDGFFAKFIMWGILTALAYHAVGGIRHMLMDFGYLPETLEMGTRSAQAAFGITVVLSILAGVLVWMDSLKTLYHAHINTLQQRAQQVLARFKLDAMLIHSGELLTVFLDDHDYPFKVNPQFKAWVPVTQVPNCWLWIDGVNKPKLWFYSPVDYWHNVEPLP…					MKALNAVAILFTAMMLQGCVAVVAGGAAVATKTATDPRTVGTQVDDGTLELRVSNALAKDEQIKNQARVVVTAYQGKVLLTGQSPSADLASRAKQIAMGVDGATEVYNEIRTGQKVSLGTSSTDTWITTKIRSQLLGSDQVKSSNVKVTTENGEVFLLGLVTQQEATAAADLASRVSGVKHVTTAFTILKMSKKLWIGLIIALVASWAGLK-P--------------HFSAAPK--------TN----------IAQLTDAETVARWLQQHHKLPDVYLTKNEARRQGWNPGKGNLCDVLPGRAIGGDRFANREQRLPQQAGRQWYEADVNYDCGHRDADRLLYSSDGLIFLTTDHYRSFKPVPMFASTQKRVLPGFGLSLGTSLLFTCLILLLPISAL…					------------------------------------------------MANNIRIEEDLLGMREVPADAYYGVHTLRAIENFYISNSKISDIPEFVRGMVMVKKAAAMANKELQTLPRDIANIIIQACDEVLDKGRCMDQFPVDVYQGGAGTSVNMNTNEVLANIGLELMGHQKGEYQYLNPNDHVNKCQSTNDAYPTGFRIAVYSSLLKLLDGISQLAEGFQRKADEFQTILKMGRTQLQDAVPMTLGQEFHAF					-MRTRQKLSVVTIAKDAAELLPECLESVSWADEIIVLDSGSSDATPQIAARHGAKVYHSSEWRGYGKQRQLAQSYASHPMILMIDSDERVTPELKQSIEKVLQQP-PTEVVYSLARCNLFLGRFMRHSGWYPDRVIRLYPRQFRYNDNLVHESLETAQAKTERLRGDLLHLTCRDFSAFQWKQFAYAEAWAKQRHQQGKRCGIAAIFGHTAGAFIKTLLLRAGFLDGKQGWLLAVVNAQYTFNKYTALWALN---					MTTQAPPSSLLPLNPEQLARLQAATGDYSTTQLAWLSGYFWGMV-----NQAPGTAAVS---APAPVEAPAITLLSASQTGNARRLAEQLRDDLLAAKLNVNLVNAGDYKFKQIAQEKLLVVVTSTQGEGEPPEEAVALHKFLMSKKAPKL-DNTAFAVFGLGDTSYEFFSQAGKDFDGKLAEMGGERLLDRVDADVEYAADAEQWRKQIVTILKARVPAESPAAAAATAAGSVNEVFSSPYSKEEPLTASFAVNQKITGRDSDKDVRHIEIDLGDSGLRYQPGDALGVWFENDAALVQELVELVWLKGDESVTVNDQTLTLSEALQKHFELTVNTPQIVEQYGTLSRDETLLGLISEKPKLQHYAQNTPIVDMVRGAPVELTAEQLIALLRPLTPRLY…					MSSIRLADLAQQLDAELHGDGDIVISGIASMQSATTGQITFLANSRYREQLALIKASAVVLTEADLEWCHTAALVVKNPYLTYARMAQILDTTPQPASNIAPSAVIDPSARLGANVAIGANAVIEAEVELGDNVVIGAGCFVGKKTRIGSGTRLWANVSVYHEIQIGQDCLIQSGTVIGSDGFGYANDRGNWVKIPQLGAVIIGDRVEIGACTTIDRGALDNTLIGNGVIIDNQCQIAHNVVIGDNTAVAGGVIMAGSLKIGRYCMIGGASVINGHMEICDKVTVTGMGMVMRPITEPGVYSSGIPLQPNKTWRKTAALVMNIDDMSKRLKAIERKVGKDD-MKEKSSEGVRLDKWLWAARFYKTRALAREMIEGGKVHYNGQRSKPGKLVELDAELTL…
>T_ptyseos					>P_deleyi					>P_vagans					>P_rodasii					>P_ananatis					>P_eucrina					>P_conspicua					>P_deleyi					>P_rwandensis					>P_anthophila
MNKSRQQFLVRWLKEQRHYGRRWLRLSVITGVFSALLIITQAGIIARVLQNFIISHQPASDTPGLLVALAACFAGRSLLHYLREIAGFRAASAIREAIRQQIILRLEARGPAGTTSRAVGSWTTLLQEQIDNMQDYYARYLPQMSLATLIPALILITLLPLNWTAALILFCTAPLIPLFMAMVGMGAAEANRRNFQALARLSGDFLDRLRGLETLRLFHRGRAEQAAIAGSTEQFRLRTMEVLRLAFLSSAVLEFFAAISIAVVAVYFGFSYLGVLHFGDYHRGVTLFAGFLALILAPEFFQPLRDLGNFYHAKAQAVGAADQLETFLSETEEANLNTGTLTPGRSGPCTLVARDLVVMTAKGKPLTQPLNFTLPAGKRIALAGVSGAGKTSLINVILG…					VNTRRRNRLYAAVAILLGLSLATALVMYALRSNIDLFYTPGEILYGKGEAH-EKPGTGQRLRVGGMVMPGSVRRDPKTLAVSFKLYDARGVVSVSFEGILPDLFREGQGVVAQGVLTAGNHIVAKEVLAKHDEKYTPPEIEDAMKSNPAGQQSSYQAG--RKSSMSANNTKVKKAVIPVAGLGTRMLPATKAIPKEMLPLVDKPLIQYVVNECIAAGINEIVLVTHSSKNAIENHFDTSFELESMLEKRVKRQLLDEIQSICPPHVTIMQVRQGIAKGLGHAVMCAHPLIGNEPFAVILPDVIIDEYESNPTKDNLAEMLSRYEESGRSQIMVEPVADVTAYGVVDCQGAELNPGDSAPMVGVVEKPKAAEAPSNLAVVGRYVLSSDIWPLLAKTPPGA…					--------------------------------MFFLYPLFAVMIWSINSIVSKLSASAIDPAAISFYRWLLALLVLTPFVLPGVWRMRKIIRPHLWRLAILGLLGMVLYQSLAYYAAHSVSALFMGIIGALIPLLTVLLSVVILRIAPTLGILLGSVISFCGLVWLVSEGDVMQLLNHGMGKGELMMLAASTSYALYGVLTKRWALP---LPIWQSLYVQIVFGVLLLLPGFLLAPDVSLNWHNLPLVAFAGLFA					MQKVVLATGNPGKVRELADLLAAFGLDIVAQTELGVESAEETGLTFIENAILKARHAAQITGLPAIADDSGLAVDALGGAPGIYSARYAGEDASDQQNLDKLLVALENVPDGERQAQFHCVLVYVRHAADPVPLVFHGSWAGEITRAATGEGGFGYDPIFYVPELGKTAAELSKDEKRAVSHRGKALTLLLDAMRNAMRTQFSGLADRSQRFASSSL-----TQPSLGGITELRYSEQ-PGMMQLLLLPVLKQLSEQSRWQLWLTPAHKINRSWMQQSGLPLEKSMHINESERLSTVESMVKALRTGNYSVVLAWIPYELNDEERFELELAAAEGEALGLIMRPQGHDRVLSRQPNSSKIPSDLFHMNKVLLYCRPGFEKECAAEISAKATEREIFGFA…					MGKPASAFQPLQLATLTVSDSRDASNDTSGDYLREAAAEAGHSVIDHAIVPDNLYRIRAIVSRWIASEDVQVVIVNGGTGLNLKNSTPEALLPLFDREIEGFGELFRMISYEDIGGSTLQSRAVAGLANQTLIFAVPGSTSACTSAWERIIAEQLDARTRPCNFVTHLKKL---VGKTVKKQRPVNLDLSTIRFPVTAISSILHRVSGVITLVALGILLWLLGLSLSSPEGFQHAASVMNGFFAKFIMWGILTALAYHAVGGIRHMLMDFGYLAETLEAGKRSAQVTFGITVVLSILAGVLVWMDSLKSLYHAHITTLQQRAQQVLARHKLDAMLIHSGELLTVFLDDHTYPFKVNPQFKAWVPVTQVPNCWLWIDGVNKPKLWFYSPVDYWHNVEPLP…					MKALNAIALLLTAMLLQGCVAVVAGGAAVATKTATDPRTVGTQVDDGTLELRVSNALAKDEQIKKQARVIVTAYQGKVLLTGQAPSADLASRAKQIAMGVDGATEVYNEIRTGEKVSLGTSSSDTWITTKIRSQLLGSDQVKSSNVKVTTENGEVFLLGLVTQEEATAAADVASRVSGVKHVTTAFTILKMSILRWIGLLAIVIVCWTALR-P--------------HFSAPPADPTAGHATTSSSAT------IDALTQAERVADWLVQHQRLPDFYLTKAAARRQGWEPDKGNLCEVLPERAIGGDRFSNREQQLPRQAGRQWYEADVNYRCGRRGADRLIYSSDGLIYLTRDHYRSFRKVHMFATAQKRVLPGFGLSLGTSLLFTCLILLLPISAL…					------------------------------------------------MANNIRIEEDLLGMREVPADAYYGVHTLRAIENFYISNSKISDIPEFVRGMVMVKKAAAMANKELQTIPRNIANTIIQACDEVLNNGRCMDQFPVDVYQGGAGTSVNMNTNEVLANIGLELMGHQKGEYQYLNPNDHVNKCQSTNDAYPTGFRIAVYSSLLKLLDGINQLAEGFQRKADEFQTILKMGRTQLQDAVPMTLGQEFHAF					-MSVRQRLSVVMITKNEAGLLPDCLASVSWADEIIVLDSGSDDGSTDIATRAGAQVYRNADWQGYGIQRQRAQDYATGDMILMIDADERVSPELRAAIEQVLTAP-PGRTIYSLGRSNLFLGRFMRHSGWYPDRVLRLYPRTFRYNDNLVHESLQSEGAPVVALPGDLQHLTCRDLVAFQRKQLAYAEAWATERHQRGKGCSLFSVFSHTLGAFVKTLVLRAGFLDGKQGWILAVVNAQYTFNKYSALWALN---					MTTQAP-GSLLPLNPEQLARLQAATTDFNTTQMAWLSGYFWGMV-----NQTPGAVAAP---APVQAEVPTITLISASQTGNARRLAEQLRDDLLAAKLSVNLVNAGDYKFKQIGQEKLLVVVTSTQGEGEPPEEAVALHKFLLSKKAPKFAAGSAFAVFGLGDTSYEFFSKAGKDFDERLAELGAERLLDRVDADVEYKEQASAWRQQLTEILKARVPSEPSVVAAVTASGVVNDIHSSPYTKEAPLTASFAANQKITGRDSDKDVRHIEIDLGESGLRYQPGDALGVWFENDAELVQELLQLVWLKGDESVEVNGETLPLTEALQKHYELTVNTPQIVEQYAALSRNDALLALAGEKPKLQSYAQSFPIVDMVRQAPTELNAEQLTGMLRPLTPRLY…					MASIRLADLAQQLDAELHGDGDIVISGIASMQSATTGQITFLANSRYREQLALIKASAVVLTEADLEWCNTAALVVKNPYLTYARMAQILDTTPQPAQNIAPSAVIDPSARLGNNVAIGANAVIEADVELGDNVVIGAGCFVGKKTRIGRGTRLWANVSVYHEIQIGQDCLIQSGTVIGSDGFGYANDRGNWVKIPQLGAVIIGDQVEIGACTTIDRGALDNTLIGNGVIIDNQCQIAHNVVIGDNTAVAGGVIMAGSLKIGRYCMIGGASVINGHMEICDKVTVTGMGMVMRPITEPGVYSSGIPLQPNKTWRKTAALVMNIDDMSKRLKAIERKVGKDD-MKEKSSEEVRLDKWLWAARFYKTRAIAREMIEGGKVHYNGQRSKPGKIVELNAELTV…
>P_cypripedii					>P_sp_GM01					>P_sp_A4					>P_vagans					>P_deleyi					>P_sp_GM01					>P_rwandensis					>T_morbirosei					>P_allii					>P_cypripedii
MNKSRQQELIRWLRQQRHHGARSLRLVSLLGFASAVVIIAQAWLLATLLQALIITHQPRAELISQFALLLLCFVLRAGLNYGREMAGQRAGMAIRRALRQQVLDRLNALGPAWIQGKPAGSWATLLLEQIEEMQEYYARYLPQMSLAVFIPCAILVAIFPINWAAGLILLVTAPLIPLFMAMVGMGAADANRRNFLALARLSGDFYDRLRGRETLRLFDRASAEQQAISRTTTDFRQRTMEVLRLAFLSSAVLEFFASLAIAVVAVYFGFSYLGELNFGHYHSGVTLFAGFLALILAPEFFQPLRDLGTFYHAKAQAVGGADALDRFLQDSPDAPTSTG-VTATFSAPLQLEARDLVVMTARDEALSQPLTFSLAAGKRVALVGQSGAGKTALMNVLLG…					VNIRRRNRLYVALAVLIGLGLATSLVMYALRSNIDLFYTPSEILYGKGEDH-QKPEPGQRLRIGGMVMPGSVKRDPNTLAVSFKLYDANGVVSVSYEGILPDLFREGQGVVAQGVLAEGNQVNAKEVLAKHDEKYTPPEIEDAMKKNHTGPAAAYQQA--GAQSMSAYKTKVKKAVIPVAGLGTRMLPATKAIPKEMLPLVDKPLIQYVVNECIAAGINEIVLVTHSSKNAIENHFDTSFELESMLEKRVKRQLLDEIQSICPPHVTIMQVRQGIAKGLGHAVMCAHPLIGDEPFAVILPDVIIDEYESDPTKDNLAEMLTRYEESGRSQIMVEPVADVTAYGVVDCQGADLAPGQSAPMVGVVEKPKASEAPSNLAVVGRYVLSADIWPLLAKTPPGA…					--------------------------------MSFLFPLIAVLIWSVNAIVSKLSAGAIDPAAISFYRWLIALVVLTPFALPGVLRHRQQIKQQWWRLLILGLLGMVMYQSLAYYAAHSVSALFMGILNALIPLLTVLLSLPLLRVAPTLGILFGSLLSFSGLVWLVSQGNLAQLLQHGLGKGELMMFIASTCYALYGVLTRRWALP---LPNWQSLYVQIVFGVLLLLPGFIAAPDVQLNSHNLPLVLFAGTFA					MQKVVLATGNPGKVRELAELLSAFGLDIVAQTDLGVESAEETGLTFIENAILKARHAAQITGLPAIADDSGLAVDALGGAPGIYSARYAGEEASDQQNLEKLLQALENVPDGQRQAQFHCVLVYLRHAEDPTPLVFHGSWQGEIARSASGAGGFGYDPIFFVPALGKTAAGLSKAEKGAVSHRGKALTLLLEAMRNAMRTQHPDNARYAHHYASSSV-----PASQGGGITELRCSEQ-PGMMQMLLLPLLQQLSQQSRWQLWLTPAHKLNRTWMQESGLPLDKSMHIADSERLNAVEAMVKALRTGNYSVVLAWIPYDLDEDERRQLENAAAEGEALGLILRASGTSEAPLRPQSAIKIQSDLFHMNKVLLYCRPGFEKECAAEISAKAAESEIYGFP…					MGKSASEFQAVQIAVMTVSDRRDASNDTSGDYLRAAAAEAGHAVVDHAIVPENLYRIRATVSRWIASDDVQVVIINGGTGFNLKNSTPEALLPLFDREIDGFGELFRMISYEEIGGSTLQSRAVAGLANGTLILAVPGSTSACRTAWERIIVDQLDARTAPCNFVSHLKKR---VGKTVKKQRPVNLDLSTIRFPVTAISSILHRVSGVITLVAIGILLWLLGLSLSSPEGFQHAASIMDGFFAKFIMWGILTALAYHAVSGIRHMLMDFGYLAETLQVGKRSAHVTFVITVVLAILAGVLVWMDSLKTLYHAHIATLQQRAQQVLARNKLDAMLIHSGELLTVFLDDHTYPFKVNPQFKAWVPVTQVPNCWLWIDGVNKPKLWFYSPVDYWHNVEPLP…					MKALNAVAILLTALLLQGCVAVVAGSAAVATKTATDPRTVGTQVDDGTLELRVTNALAKDEQIKNQARVVVTAYQGKVLLTGQSPTPDLASRAKQIAMGVDGATEVYNEIRSGQKVSFGTSSSDTWITTKIRSQLLGSDQVKSSNVKVTTENGEVFLLGLVTAQEAQAAADVASRVSGVKHVTTAFTILKMSKKLWIALILILAALWLGLK-P--------------HLSDKWA--------NSHP-D------ISQLTDANTVARWVQQHQRLPDLYLTKNEARRQGWNPSKGNLCEVLPGRAIGGDRFSNRERRLPMQAGRQWYEADVNYDCGHRDADRLLYSSDGLIFLTTDHYRSFKQVPMFALTQKRVLPGFGLSLGTSLLFTCLILLLPISAL…					------------------------------------------------MANNIRIEEDLLGMREVPADAYYGVHTLRAIENFYISNNKISDIPEFVRGMVMVKKAAALANKELQTIPRNIANTIIQACDEVLNNGKCMDQFPVDVYQGGAGTSVNMNTNEVLANIGLELMGHQKGEYQYLNPNDHVNKCQSTNDAYPTGFRIAVYASILKLLDGISQLSEGFQRKAVEFENILKMGRTQLQDAVPMTLGQEFHAF					-MSTRQRLSVVMITKNEAELLPDCLQSVAWADEIIVLDSGSTDQTADIARQAGARVFYSEQWPGYGLQRQHAQQYASGDMILMIDADERVTPELRAAIEEVLQQSASPDNVYSIARSNWFLGRFMRHSGWYPDRVTRLYPARFRYNSHLVHESLEHSGASVIRLSGDLKHLTCRDLHHFQQKQLAYANAWAAQRFSQGRSCSLYSVYSHTVAAWLKTAILRAGILDGSQGWVLALVNAQYTFNKYAILWALN---					---------MLPLSPEQLARLQAATTDFSTTQLAWLSGYFWGMV-----NQTPGQAVAS---APAQAEAPAITLLSASQTGNARRVAEQLRDDLQAAKLTVNLVNAGDFKFKQIGQEKILIVVTSTQGEGEPPEEAVALHKFLMSKKAPKL-DGAAFAVFGLGDTSYEFFSKAGKDFDNRLAELGAERLLDRVDADVEYAEQASAWRTAITAVLKERVPTASPAQSVATVAGSVNDVFTSPYTKEQPLSASLAVN					MSSIRLADLAQQLDAELHGDGDIAISGIASMQSATTGQITFLANSRYREQLAQVHASAVVLTEADLEWCKTAALVVKNPYLTYARMAQLLDTTPQPAQNIAPSAVIDPTAKLGNNVSVGANAVIESGVELGDDVVIGAGCFVGKQTRIGRGSRLWANVTIYHEIQIGQDCLIQSGAVIGADGFGYANDRGNWVKIPQLGTVVIGDRVEIGACTTIDRGALDNTLIGNGVIIDNQCQIAHNVVIGDNTAVAGGVIMAGSLKIGRYCMIGGASVINGHMEICDKVTVTGMGMVMRPITEPGVYSSGIPLQPNKTWRKTAALVMNIDDLSKRLKAIERKVGKDD-MKEKDSAGVRLDKWLWAARFYKTRAIAREMVEGGKVHYNHQRSKPSKLVELEAELTL…
>P_dispersa					>P_ananatis					>P_sp_GM01					>P_eucrina					>P_allii					>P_vagans					>T_ptyseos					>P_vagans					>P_dispersa					>P_s_indologenes
MNKSRQHELLRWLRQQRHHGARSLRLASLAGFAAALILIAQAWLLASLLQKLLVEQQPRAELVSDFLLLLLCFALRAALHYGREMAGFRAGVAIRRALRQQVLDRLNALGPAWIQGKPAGSWATLLLEQIEEMQEYYARYLPQMSLAVFVPCAILIAIFPINWAAGLILLATAPLIPLFMALVGMGAADANRRNFLALARLSGDFYDRLRGRETLRLFHRADAEQQAIAASTQDFRQRTMEVLRLAFLSSAVLEFFASLAIAVVAVYFGFSYLGELNFGHYGTGVTLFAGFLALILAPEFFQPLRDLGTFYHAKAQAVGGADALDTFLRETPHRAPQAASQTQDADAPFSLRAQDLVIMTATGEALSQPLNFSLTPGQRVALVGQSGAGKSALMNVLLG…					VNTRRRNRLYVVVAILTGLGLATALVMYALRSNIDLFYTPGEILEGKGDAH-IKPEPGQRLRVGGVVMPGSVTRDPHTLAVSFQLYDGRGVVNVSFVGILPDLFREGQGVVAQGVLEPGNLIKANEVLAKHDENYTPPEISTAMKPAPSAQQAANNPA--GRTPMSAYKTKVKKAVIPVAGLGTRMLPATKAIPKEMLPLVDKPLIQYVVNECIAAGINEIVLVTHSSKNAIENHFDTSFELESMLEKRVKRQLLDEIQSICPPHVTIMQVRQGIAKGLGHAVMCAHPLVGDEPVAVILPDVIIDEYESNPTKDNLAEMLSRYEESGRSQIMVEPVSDVTAYGVVDCQGAELNPGDSAPMVGVVEKPKASEAPSNLAVVGRYVLSADIWPLLAKTPPGA…					--------------------------------MNLLFPLIAVLIWSINTIVSKLSAGSIDPAAISFYRWLLALVVLAPFCLPGVWRHRLTIKANGWRLLILGLLGMVLYQSLAYYAAHSVSAVMMGILGATIPLLTILLSLVVLRLAPTRGILIGGLLSFAGLVWLVSEGNPAQLLNQRLGNGELMMLAASTSYALYGVLTKRWAIP---LPTWQSLYVQIFFGVLLLLPGFLRAPDVTLNMHNVPLVLYAGLFA					------------------------------------------------------------------------------------------------------------VPDGARQAQFHCVLVYVRHAADPVPLVFHGSWAGEITRTAAGEGGFGYDPIFFVPEAGKTAAELSKEDKRALSHRGKALTLLLDAMRNG-----------------------------MGGITELRYSEH-PGMMQLLLLPVLKQLS					MGKPASAFQPLQLATLTVSDSRDASNDTSGDYLREAAIEAGHSVIDHAIVPDNLYRIRAIVSRWIASEDVQVVIVNGGTGFNLKNSTPDALLPLFDREIEGFGELFRMISYEEIGGSTLQSRAVAGLANQTLIFAVPGSTSACTSAWERIIADQLDARTRPCNFVTHLKKR-------------------------------------------------------------------MNGFFAKFIMWGILTALAYHAVGGIRHMLMDFGYLAETLEAGKLSAQVTFGITVVLSILAGVLVWMDSLKSLYHAHITTLQQRAQQVLARHKLDAMLIHSGELLTVFLDDHTYPFKVNPQFKSWVPVTQVPNCWLWIDGVNKPRLWFYSPVDYWHNVEPLP…					MKALNAIAILLTAMLLQGCVAVVAGGAAVATKTATDPRSVGTQVDDGTLELRVTNALAKDQQIKTDARVIATAYQGKVLLTGQAPSQEIANRAKQITMGVDGATEVYNEIRIGQKVTLGTTSSDTWITTKIRSQLLGSDQVKSSNVKVTTENGEVFLLGLVTQQEAQAAADVASRVSGVKHVTTAFTMLKMSKKLWIGLFLVLAACFYGLK-P--------------YLNTVSA--------PAQA-D------IATLTDAHTVARWVLQHQQLPDYYLTKSDARKRGWNPATGNLCEVLPGRAIGGDRFTNREKRLPARAGRQWYEADVNYRCGHRDADRLVYSSDGLVFLSTDHYRSFRQVPMFAASHKRVLPGFGLSLGTSLLFTCLILLLPISAV…					------------------------------------------------MVNNIRIEEDLLGMREVPADAYYGIHTLRAIENFYISSSKISDIPEFVRGMVMVKKAAALANKELQTIPRHIADHIIQACDEVLNNGTCMDQFPVDVYQGGAGTSVNMNTNEVLANIGLELMGHNKGEYQYLNPNDHVNMCQSTNDAYPTGFRIAVYNSLLKLVDAINALAEGFQRKAIEFKNILKMGRTQLQDAVPMTLGQEFNAF					-MSARQRLSVVMIAKNEAELLPDCLASVSWADEIIVLDSGSSDDSVEIATQAGAQVYQSDDWQGYGIQRQRAQHYATGDMILMIDADERISPELRAAIEQVLVAP-PSRTVYSLGRSNLFLGRFMRHSGWYPDRVMRLYPRTFRYNDNLVHESLQSDGAPVVALPGDLEHLTCRDLIAFQRKQLAYAEAWATERHQRGKRCGLFSVFSHTLGAFVKTLLLRAGFLDGKQGWILAVVNAQYTFNKYSALWALN---					MTTQAP-PAMLPLSPEQIARLQAATTDFNPTQLAWLSGYFWGMV-----NQAPGTVAAP---APAAAEVPGITLISASQTGNARRLAEQLRDDLLAAKLSVNLVNAGDYKFKQIGQEKLLVIVTSTQGEGEPPEEAVALHKFLLSKKAPKL-SDTAFAVFGLGDTSYEFFSQAGKDFDQRLAELGGERLLDRVDADVEYSELASAWRLQLTDILKARVPAEPAAQLAASAAGSVNLVDSSPYTKEAPLTASFALNQKITGRNSDKDVRHIEIDLGDSGLRYQPGDALGVWYENDAELVQELLQLVWLKGDEQVEVRGETLPLAEALQKHFELTVNTPQIVEQYAALSRNEALLALAGDKPKLQSFAQSFPIVDMVRQAPTELNAGQLTGLLRPLTPRLY…					MSSIRLADLAQQLDAELHGDGDIAISGIASMQSATTGQITFLANSRYREQLALVQASAVVLTEADLEWCKTAALVVKNPYLTYARMAQLLDTTPQPAQDIAPSAVIDPSARLGANVSVGANAVIESDVELGDNVVIGAGCFVGKKTRIGSGTRLWANVSVYHEVVIGQHCLIQSGTVIGSDGFGYANDRGNWVKIPQLGSVIIGDRVEIGACTTIDRGALDNTLIGNGVIIDNQCQIAHNVVIGDNTAVAGGVIMAGSLKIGRYCMIGGASVINGHMEICDKVTVTGMGMVMRPITEPGVYSSGIPLQPNKTWRKTAALVMNIDDMSKRLKAIERKVGKDD-MKEKSEDGVRLDKWLWAARFYKTRSIAREMIEGGKVHYNGQRSKPSKLVERDAELTL…
>P_allii					>T_morbirosei					>P_agglomerans					>P_conspicua					>T_sp_NML_06					>P_deleyi					>P_s_indologenes					>P_sp_At-9b					>P_eucrina					>E_billingiae
MNKSRQQHLTRWLRQQRHHAGPWLRLASLLGSAGALLIIMQAWLLASLLQALIVEQQAPQSLLPRFMLLLLCFVLRAVLNYAREQAGFRAGQAIRQALRKQVLDRLSDLGPAWIQGKPAGSWATLLLEQTEDMQAYYARYLPQMTLAAVIPCCILITLFPLNWAAGLILLATAPLIPLFMAMVGMGAADANRRNFLALARLSGDFLDRLRGRETLRLFHRADAEKQAIAATTTDFRQRTMEVLRLAFLSSSVLEFFASLAIAVVAVYFGFSYLGELHFGDYGKGVTLFAGFLVLILAPEFFQPLRDLGTFYHAKAQAIGGADALERFMQDTPSSDRASGNVAFSATSPLELVADNLVVCAPDDKVLCGPLHFTLRASGRVALVGKSGAGKTALLNALLG…					VNIRRRRRLLVVVAILVGLGLATGLVMYALRSNIDLFYTPSEILNGRGPEHKDIPHPGQRLRIGGMVMPGSVKRDPKSLAVEFKLYDANGVVSVSYVGILPDLFREGQGIVAEGVLEDGNLIKADQVLAKHDEKYTPPEIEDAMKQNHKGPAKRYQNP-QGEQQMSAYKSKVKKAVIPVAGLGTRMLPATKAIPKEMLPLVDKPLIQYVVNECIAAGIHEIILVTHSSKNSIENHFDTSFELEAMLEKRVKRQLLDEIQSICPPHVTIMQVRQGVAKGLGHAVMCAHPLVGDEPFAVILPDVIIDEYESNLQQENLAEMMHRFDDTGRSQIMVEPVVDVTAYGVVDCQGADLQPGQSAPMVGVVEKPKATEAPSNLAVVGRYVLSEHIWPLLAKTPPGA…					--------------------------------MFFLYPLFAVIIWSINSIVSKLSADAIDPAAISFYRWLLALLVLTPFVLPGVWRTRQVIKPHLWRLAILGLLGMVLYQSLAYYAAQSVSALFMGIIGALIPLLTVLLSVVILRIAPTLGILLGSIISFTGLVWLVSEGNVMQLLNHGLGKGELLMLAASAAYALYGVLTRRWALP---LPIWQSLYVQILFGVVLLLPGFLLAPEVALNRHNLPLVAFAGLFA					MQKVVLATGNPGKVRELADLLSAFGLNIVAQTELGVESAEETGLTFIENAILKARHAAKITGLPAIADDSGLAVDALGGAPGIYSARYAGEEASDQQNLEKLLQALENVPDGQRQAQFHCVLVYLRHADDPTPLVFHGSWQGEITRAAAGAGGFGYDPIFFVPALGKTAAELSKAEKGEVSHRGKALTLLLEAMRNA--------------------------------------------MMQMLLLPLLQQLSQQSRWQLWLTPAHKLNRAWLQQSGLPLDKSMHIADSDRLNAVEAMIKALRTGNYSVVLAWIPYELDEDERRQLENAAAEGDALGLILRSSGSPEAPLGPQNALKIQSDLFHMNKVLLYCRPGFEKECAAEISAKAAEREIYGFP…					MSKAPKAFVPLTVAVMTVSDRRDASQDSSGDYLVQAAQEAGHRVAVQQICGDNRYQIRAQVSTWIASPDIQVILINGGTGFTAANSTPEALEPLFDRTINGFGELFRMVSYEEIGGATLQSRALAGMANQTLIFAMPGSTSACQQAWQRIICQQIDATTRPCNFVSQLKNL---VGKIVKKQRPVNLDLSTIRFPVTAIASILHRISGVITFAAVGILLWLLGLSLSSPEGFQQASAIFSNLFVKLILWGIVTALAYHIVGGIRHLLMETGVLDETLAAGQRSAKASFIITIVLAVLAGVLVWMNSLNALYQSHLTTLQHRAQQVLAANQLDALLIHSGELQSVFLDDHHYPFKVSAPFKAWLPVTQTPNCWLWVDGVSKPTLWFYSPVDYWHKTDPLP…					MKALNAIAILLTALLLQGCVAVVAGGAAVATKTATDPRSVGTQVDDGTLELRVTNALAKDQQIKTDARVIATAYQGKVLLTGQAPSQEIANRAKQITMGVDGATEVYNEIRIGQKVTLGTTSSDTWITTKIRSQLLGSDQVKSSNVKVTTENGEVFLLGLVTQQEAQAAADIASRVSGVKHVTTAFTMLKMSKKLWIGLFLVLAVCFYGLK-P--------------WLNRVSA--------PAQP-D------IATLTDARTVARWVLQHQHLPDYYLTKNDARKRGWNPEKGNLCDVLPGKAIGGDRFANREKRLPTRAGRQWYEADVNYRCGHRDADRLVYSSDGLVFLSTDHYRSFRQVPMFAASHKRVLPGFGLSLGTSLLFTCLILLLPISAV…					------------------------------------------------MANNIRIEEDLLGMREVPADAYYGVHTLRAIENFYISNSKISDIPEFVRGMVMVKKAAAMANKELQTLPRDIANTIIQACDEVLNNGRCMDQFPVDVYQGGAGTSVNMNTNEVLANIGLELMGHQKGEYQYLNPNDHVNKCQSTNDAYPTGFRIAVYSSLLKLLDGISQLADGFQRKADEFQTILKMGRTQLQDAVPMTLGQEFHAY					-MSQRQRLSVVMIAKNEAELLPEALASVSWADEIVVLDSGSHDATIEVARQHGAQVYQAEAWAGFGKQRQRAQAYAGGDMILMIDADERVTPPLRHAIEQVLAQP-PATTVYSLGRSNLFLGRFMRHSGWYPDRVMRLYPRHLNYNDNLVHESLDTQGAPVVRLEGDLQHLTCRDLVAFQRKQLNYAEAWAQERFQRGKRCGIFSIFSHTLGAFLKTLLLRAGFLDGKQGWILAVVNAQYTFNKYSALWALH---					---------MLPLSPEQLARLQAATTEFNTTQLAWLSGYFWGMV-----NQTPGAVATP---AAPPAETPGVTLISASQTGNARRLAEQLRDDLLAAKLNVNLVNAGDYKFKQIGQEKLLVIVTSTQGEGEPPEEAVALHKFLLSKKAPKM-DGAAFAVFGLGDTSYEFFSQAGKDFDSRLAELGAERLLDRVDADVEYSELASAWRLQLTDLLKARVPVAPAAQIAASSAGSVNLVDSSPYTKELPLTASFALN					MSSIRLADLAQQLDADLHGDGELVISGIASMQSAQSGQITFLSNSRYREQLVTCKASAVVLTEADLDCVQGAALVVKDPYLTYARMAQILDSTPQPAKDIAPSAVIDASAKLGQHVSIGANAVIESGVELGDNVVIGAGCFVGKNTRIGAGTRLWANVSIYHEILIGERCLIQSGTVIGADGFGYANDRGNWVKIPQLGTVIIGDRVEIGACTTIDRGALDNTQIGNGVIIDNQCQIAHNVVIGDNTAVAGGVIMAGSLKIGRYCMIGGASVINGHMEICDKVTVTGMGMVMRPITEPGVYSSGIPLQPNKTWRKTAALVMNIDEISKRLKAIERKVDKD--MKEKSAEAIRLDKWLWAARFYKTRSAARQMIEGGKVHYNGQRSKPSKIVELNAELTL…
>P_sp_aB					>P_anthophila					>P_wallisii					>P_cypripedii					>P_conspicua					>P_ananatis					>P_deleyi					>P_sp_aB					>E_tasmaniensis					>P_deleyi
MDKSRQQHLTRWLRQQRRFAGRWLRLNTLLGTASALLIIVQAGLLASLLQALIIDQQPRETLTVSILLLLLCFVLRALINYARELTGYRAGQAIRQALRQQVLDRLSDLGPAWIQGRPAGSWATLLLEQIEEMQEYYARYLPQMTLAVVIPCCILLTIFPLNWTAGLILFATAPLIPLFMALAGMGAAEANRRNFLVLARLSGNFLDRLRGRETLRLFHRGEAEQQAVAAATTDFRQRTMEVLRLAFLSSAVLEFFASLAIAVVAVYFGFSYLGELHFGDYGQGVTLFAGFLVLILAPEFFQPLRDLGAFYHAKAQAVGGADALEAFMQATPDAAPQRGQRPFTTDHAIALSADDLCVCAPDGQVLCGPLTFTIAAGEQIALVGQSGAGKTALMNALLG…					VNSRRRNRLCAAVAILLGLGLATALVMYALRSNIDLFYTPGEILYGKGEAH-EKPEAGQRLRVGGMVMPGSVHRDPNSLAVTFKLYDARGVVSVSFEGILPDLFREGQGVVAQGVLADGNQIVAREVLAKHDEKYTPPEIEDAMKSNHNGPQSQYQAG--NKSSMSANNTKVKKAVIPVAGLGTRMLPATKAIPKEMLPLVDKPLIQYVVNECIAAGINEIVLVTHSSKNAIENHFDTSFELESMLEKRVKRQLLDEIQSICPPHVTIMQVRQGIAKGLGHAVMCAHPLIGNEPFAVILPDVIIDEYESNPTKDNLAEMLTRYEESGRSQIMVEPVADVTAYGVVDCQGAELNPGDSAPMVGVVEKPKATEAPSNLAVVGRYVLSADIWPLLAKTPPGA…					--------------------------------MNLLFPLIAVLIWSVNTIVSKLSAGSIDPAAISFYRWLLALLVLTPFCLPGVWRHRHTIKVNLWRLLVLGLLGMVLYQSLAYYAAHSVSAVMMGILGATIPLLTILLSLFVLRLAPTRGILIGGVLSFAGLVWLVSAGNPAQLLDQRLGNGELMMLAASTSYALYGVLTKRWAIA---LPTWQSLYVQILFGVLLLLPGFLHAPDVTLNAANVPLVLFAGLFA					MQKVVLATGNPGKVRELADLLSAFGLDIVAQTELGVESAEETGLTFIENAILKARHAAQITGLPAIADDSGLAVDALGGAPGIYSARYAGLEASDQQNLEKLLVALENVADDERQAQFHCVLVYVRHAADPTPLVFHGSWAGEITRAAAGQGGFGYDPIFYVPELGKTAAELSKDEKRAVSHRGKALTLLLDAMRNA--------------------------------------------MMQLLLLPVLQQLSLQSRWQLWLTPAHKLNRQWLQQSGLPLEKSMHITESERYSTVESMVKALRTGNYSVVLAWIPYELNDEERWELKQAAAEGEALGLVMRPQGYEAVLSRQPSASKIPSDLFHMNKVLLYCRPGFEKECAAEISAKAAEREIYGFP…					MGKAASEFQAVQIAVMTVSDRRDASEDTSGDYLRNAALEAGHEVVDHAIVPDNLYRIRATVSRWIASDDVQVVIINGGTGFNLKNSTPEALLPLFDREIDGFGELFRMISYEEIGGSTLQSRAIAGMANQTLIFAVPGSTSACRSAWERIIADQLDARTRPCNFVSHLKKR---------------LDLSTIRFPVTAISSILHRVSGVITLVALGILLWLLGLSLSSPEGFQHAATIMDGFFAKFIMWGILTALAYHAVSGIRHMLMDFGYLAETLQVGKRSAYMTFVITVVLAILAGVLVWMDSLKTLYHAHIATLQQRAQQVLAHNKLDAMLIHSGELLTVFLDDHTYPFKVNPQFKAWVPVTQVPNCWLWVDGVNKPKLWFYSPVDYWHNVEPLP…					MKALNAIAIVLTAMLLQGCVAVVAGSAAVATKTATDPRSVGTQVDDGTLELRVSNALAKDQQIKTDARVIATAYQGKVLLTGQAPSQEIANRAKQITMGVDGATEVYNEIRIGPKVSLGTSSSDTWITTKIRSQLLGSDQVKSSSVKVTTENGEVFLLGLVTPEEAKAAADIASRVSGVKHVTTAFTMVKMSKKLWVGLVLILVLCWVGLR-P--------------YLTSAPA--------KTSASD------IAALTDVRTVARWVLQHQQLPDYYITKKQARRLGWNPAKGDLCEVLPGRAIGGDRFSNRERKLPERADRQWFEADVNYRCGHREADRLVYSSDGLVFLSTDHYRTFKPVQMFAASQKRVLPGFGLSLGTSLLFTCLVLLLPISAL…					---MHDFHWHQNMIAHAPVKTDNMSARVHHDKINTSFVMVSGNNKKVIMANNIRIEEDLLGMREVPADAYYGVHTLRAIENFYISNSKISDIPEFVRGMVMVKKAAAMANKELQTIPRNIADTIIKACDEVLNNGRCMDQFPVDVYQGGAGTSVNMNTNEVLANIGLELMGHQKGEYQYLNPNDHVNKCQSTNDAYPTGFRIAVYSSLLKLLDGISQLSEGFQHKADEFQTILKMGRTQLQDAVPMTLGQEFHAF					-MSVRQRLSVVMIAKNEAELLPDCLASVSWADEIIVLDSGSRDDTVNIATRAGAQVYHSDNWQGYGIQRQRAQGYATGDMILMIDADERVSPELRAAIEQVLVAP-PSRTVYSLGRSNLFLGRFMRHSGWYPDRVMRLYPRTFRYNDNLVHESLQSDGAPVVALPGDLEHLTCRDLIAFQRKQLAYAEAWATERHQRGKRCGLFSVFSHTLGAFVKTLLLRAGFLDGRQGWILAVVNAQYTFNKYSALWALN---					MTTQAP-SNMLPLNPEQLARLQAATGDFSPTQLAWLSGYFWGMV-----NQAPGAPVAS---APVAVDVPAVTILSASQTGNARRLSEQLRDDLLGAKLNVNLVNAGDYKFKQIGQEKLLVVVTSTQGEGEPPEEAVALHKFLMSKKAPKM-DASAFAVFGLGDTSYEFFSKAGKDFDARLAELGAERLLDRVDADVEYAAEAQSWRQRLTDILQARVPQAGSAQVTAAVTGSVNEIHSSPYSKEAPLSASLAVSQKITGRDSDKDVRHIEIDLGDSGLRYQPGDALGVWFENDTALVQELLELLWLKGDEPVTVDEHAVPLAQALQKHYELTVNTPQIVEKYAGLSRNEALMSLIGDKSALQHYAQTTPIVDMARYAPTELNAEQLTGLLRPLTPRLY…					MSSIRLADLAQQLDAELHGDGDIVISGIASMQSATTGQITFLANSRYREQLALIKASAVVLTEADLAWCNTAALVVKNPYLTYARMAQILDTTPQPAQNIAPSAVIDPSARLGSNVAIGANAVIEADVELGDNVVIGAGCFIGKKTRIGSGTRLWANVSVYHEIVIGQDCLIQSGTVIGSDGFGYANDRGNWVKIPQLGAVIIGDRVEIGACTTIDRGALDNTLIGNGVIIDNQCQIAHNVVIGDNTAVAGGVIMAGSLKIGRYCMIGGASVINGHMEICDKVTVTGMGMVMRPITEPGVYSSGIPLQPNKTWRKTAALVMNIDDMSKRLKAIERKVGKDD-MKEKNSEEVRLDKWLWAARFYKTRAIAREMIEGGKVHYNGQRSKPSKVVELNAELTL…
>T_morbirosei					>P_sp_At-9b					>E_tasmaniensis					>P_s_stewartii					>P_brenneri					>P_allii					>E_tasmaniensis					>P_ananatis					>P_rodasii					>P_vagans
MNKSRQQFLIRWLKQQRHFGQRWLRLSVITGIFSAILIIAQAALLASLLESIIVRPATDTPLLPRLFALAGCFILRALLHYFRELFGFRAGTAICEAIRRQIIDRLESLGPVGIKTRPVGSWTTLLQEQIDNMHDYYARYLPQMSLAALIPLMILLVLAPLNWSAALILFCTAPLIPLFMAMVGMGAAEANRKNFHALARLSGDFLDRLRGLETLRLFQRGSAEQRAIADSSEQFRQRTMEVLRMAFLSSAVLEFFAAISIAVVAVYFGFSYLGVLHFGDYHRGVTLFAGFLVLILAPEFFQPLRDLGNFYHAKAQATGAADVLEDFMQQTQPEEIPRPGSQPPGIGPVTLHATDLVVTTAGGIPLTQPLNFTLQAGRRVALLGTSGAGKTSLMNALLG…					VNIRRRNRLYVVVAVLVGLGLATTLVMYALRSNIDLFYTPSEILYGKGEEH-QKPEPGQRLRVGGMVMPGSVKRDPQTLAVSFKLYDANGVVSVSYEGILPDLFREGQGVVAQGVLEDGNLVNAKEVLAKHDEKYTPPEIQDAMKKNHTGPAATYQQA--GAQSMSAFKSKVKKAVIPVAGLGTRMLPATKAIPKEMLPLVDKPLIQYVVNECIAAGINEIVLVTHSSKNAIENHFDTSFELESMLEKRVKRQLLDEIQSICPPHVTIMQVRQGIAKGLGHAVMCAHPLVGDEPVAVILPDVIIDEYESDPTKDNLAEMLARYEESGRSQIMVEPVADVTAYGVVDCKGADLAPGESAPMVGVVEKPKAAEAPSNLAVVGRYVLSADIWPLLAKTPPGA…					--------------------------------MNFLFPLLAVLIWSVNAIVSKLSAAAIDPAAISFYRWLVALLVLAPFALPGVWRHRQQIKQSWWKLLVLGLLGMVMYQSLAYYAAHSVSALFMGIVAALIPLLTVLLSVVVMRLAPTLGILLGSLLSFFGLVWLVSQGEPAKILTQGLGKGEIMMFVASLSYALYGVLTRRWAIP---LPNWQSLWMQILFGVLLLTPNFLLATDVSLNAHNLPLVLFAAIPA					MQKVVLATGNPGKVRELADLLSAFGLDIVAQTDLGVESAEETGLTFIENAILKARHAAQVTGLPAIADDSGLAVNALGGAPGIYSARYAGDDASDQQNLEKLLQALESTPDGQRQAQFHCVLVYLRHAADPTPLVFHGAWDGEITRTPAGEGGFGYDPVFYIPALGKTAAELTKAEKGKVSHRGKALTLLLEAMRNAMRTQHPRNVCPTHRYASPSD-----PASQSGWITELRYSEK-PGMMQMLLLPLLQQLSQQSRWQLWLTPAHKLSRVWMQEAGLPLEKSMHIADAERYNAVEAMIKALRTGNYSVVLAWIPYDLDEDGRRELELAAAEGEALGLILRSGESSKTPVRPESRLKIQSDLFHMNKVLLYCRAGFEKECAAEISAKAAERNVYGFP…					MGKPVSEFQALQIAVMTVSDRRDASEDSSGDYLRGAALEAGHEVVDHAIVPDNLYRIRATVSRWIASDDVQVVIINGGTGFNLKNSTPEALLPLFDREIAGFGELFRMISYEEIGGSTLQSRAIAGMANQTLIFAVPGSTNACRSAWERIIADQLDARTRPCNFVSHLKKR----------------------------------------LVALGILLWLLGLSLSSPEGFQHAATIMDGFFAKFIMWGILTALAYHAVSGIRHMLMDFGYVAETLQVGKRSAYMTFVITVVLAILAGVLVWMDSLKTLYHAHIATLQQRAQQVLAHNKLDAMLIHSGELLTVFLDDHTYPFKVNPQFKAWVPVTQVPNCWLWVDGVSKPKLWFYSPVDYWHNVEPLP…					MKALNAVAIVLTAMLLQGCVAVVAGSAAVATKTATDPRSVGTQVDDGTLELRVSNALAKDQQIKTDARVIATAYQGKVLLTGQAPSQDIANRAKQITMGVDGATEVYNEIRIGPKVSLGTSSSDTWITTKIRSQLLGSDQVKSSSVKVTTENGEVFLLGLVTPDEAKAAADIASRVSGVKHVTTAFTMVKMSKKLWVGLVLILVLCWVGLK-P--------------YLTSAPA--------KTSASD------IAALTDVRTVARWVLQHQQLPDYYITKKQARRLGWNPAKGDLCEVLPGKAIGGDRFSNRERKLPERSDRQWFEADVNYRCGHREADRLVYSSDGLVFLSTDHYRTFKPVPMFAASQKRVLPGFGLSLGTSLLFTCLVLLLPISAL…					------------------------------------------------MANNIRIEEDLLGMREVPADAYYGVHTLRAIENFYISNSKISDIPEFVRGMVMVKKAAALANKELQTIPRHVANAIISACDEVLNNGKCMDQFPIDVYQGGAGTSVNMNTNEVLANIGLEIMGHQKGEYQFLNPNDHVNKCQSTNDAYPTGFRIAVYSSILKLLDAIAQLSEGFQRKAVEFNTILKMGRTQLQDAVPMTLGQEFHAF					MTSTRQRLSVVMIAKNEAELLPDCLASVSWADEIIVLDSGSTDDTMALARAAGAQVFQAREWQGYGKQRQRAQSFASCDMILMIDADERVTPELRQAIERVLEAP-PGDTVYSFSRSNLFLGRFMRHSGWYPDRVMRLYPRTLSYNDNSVHESLNTEGASVQALKGDLQHLTCRNLMAFQRKQLAYAEAWAQERFQRGKTCSLFSVFSHALGAFAKTLLLRAGFLDGKQGWLLAVVNAQYTFNKYAALWALT---HASAKGRT--MENQPKLNSSKEVISFLAERFPHCFSAEGEARPLKIGIFQDLVERVQGEMNLSKTQLRSALRLYTSSWRYLYGIKAGATRVDLDGNPCGVLDEQHVEHARKQLEDAKARVQAQRDQQRAARREAGEGEEGASAP…					---------------------------------------------------------------------------------------------------------------------------------------------------------------------------------------------------------------------------------------------------------------					MSSIRLADLAQQLDAELHGDGDIVISGIASMQSATTGQITFLANSRYREQLALIKASAVVLTEADLEWCKTAALVVKNPYLTYARMAQILDTTPQPAQNIAPSAVIDPSARLGNNVAIGANAVIEADVELGDNVVIGAGCFVGKKTRIGSGTRLWANVSVYHEIEIGQDCLIQSGTVIGSDGFGYANDRGNWVKIPQLGAVIIGDRVEIGACTTIDRGALDNTLIGNGVIIDNQCQIAHNVVIGDNTAVAGGVIMAGSLKIGRYCMIGGASVINGHMEICDKVTVTGMGMVMRPITEPGVYSSGIPLQPNKTWRKTAALVMNIDDMSKRLKAIERKVGKDD-MKEKSSEEVRLDKWLWAARFYKTRAMAREMIEGGKVHYNGQRSKPGKVVELNAELTL…
Tree					Tree					Tree					Tree					Tree					Tree					Tree					Tree					Tree					Tree
(P_anthophila:0.01983,P_deleyi:0.02463,(P_sp_aB:0.01443,((P_vagans:0.01276,P_agglomerans:0.00879)0.977:0.00498,((((P_s_indologenes:0.00102,P_s_stewartii:0.00242)1.000:0.02571,(P_ananatis:0.01709,P_allii:0.01655)1.000:0.01171)1.000:0.05467,(P_septica:0.06449,(((P_sp_At-9b:0.01648,P_cypripedii:0.01825)1.000:0.02527,((P_sp_GM01:0.02799,(P_rodasii:0.01875,P_rwandensis:0.01863)1.000:0.01635)1.000:0.01…					(P_agglomerans:0.00959,P_sp_aB:0.01206,(P_vagans:0.01008,(P_deleyi:0.02657,(P_anthophila:0.02082,((((P_s_indologenes:0.00178,P_s_stewartii:0.00314)1.000:0.02680,(P_allii:0.01699,P_ananatis:0.01472)1.000:0.01013)1.000:0.04679,(P_septica:0.07983,(((P_cypripedii:0.01868,P_sp_At-9b:0.01925)1.000:0.02932,((P_sp_GM01:0.03503,(P_rodasii:0.02383,P_rwandensis:0.02157)1.000:0.01390)1.000:0.00951,((P_eucrin…					(P_wallisii:0.02734,((P_sp_GM01:0.02913,(P_rwandensis:0.01914,P_rodasii:0.01963)1.000:0.01340)1.000:0.00985,((P_cypripedii:0.01928,P_sp_At-9b:0.01724)1.000:0.02153,((P_sp_A4:0.10178,((T_morbirosei:0.07936,(T_ptyseos:0.07178,T_sp_NML_06:0.10701)1.000:0.03220)1.000:0.14711,(E_billingiae:0.07132,(E_pyrifoliae:0.03890,E_tasmaniensis:0.03334)1.000:0.06924)1.000:0.06750)1.000:0.02702)1.000:0.01806,(P_s…					(P_anthophila:0.01958,((((P_s_indologenes:0.00207,P_s_stewartii:0.00824)1.000:0.02552,(P_allii:0.01436,P_ananatis:0.02204)1.000:0.01353)1.000:0.04396,(P_septica:0.06527,(((P_sp_At-9b:0.02019,P_cypripedii:0.02125)1.000:0.02183,((P_sp_GM01:0.03754,(P_rwandensis:0.02090,P_rodasii:0.02444)1.000:0.01467)1.000:0.01195,(P_dispersa:0.02727,(P_wallisii:0.03181,P_eucrina:0.07379)0.838:0.00797)1.000:0.01024…					(P_wallisii:0.03425,((P_sp_GM01:0.03220,(P_rwandensis:0.02000,P_rodasii:0.02120)1.000:0.01788)1.000:0.01180,((P_sp_At-9b:0.02064,P_cypripedii:0.01919)1.000:0.02427,((P_sp_A4:0.10799,((T_morbirosei:0.09485,(T_ptyseos:0.07926,T_sp_NML_06:0.10105)1.000:0.03627)1.000:0.15255,(E_billingiae:0.07360,(E_pyrifoliae:0.04159,E_tasmaniensis:0.03899)1.000:0.06918)1.000:0.08458)1.000:0.03011)1.000:0.01815,(P_s…					(P_sp_aB:0.01041,P_vagans:0.00813,(P_agglomerans:0.00824,(P_deleyi:0.02106,(P_anthophila:0.01995,((((P_s_stewartii:0.00230,P_s_indologenes:0.00063)1.000:0.02024,(P_ananatis:0.01043,P_allii:0.01417)1.000:0.01076)1.000:0.04063,(P_septica:0.05875,(((P_cypripedii:0.02042,P_sp_At-9b:0.01365)1.000:0.01952,((P_sp_GM01:0.02881,(P_rwandensis:0.01765,P_rodasii:0.02293)1.000:0.01378)1.000:0.01171,(P_dispers…					(P_wallisii:0.03418,(P_dispersa:0.02545,P_eucrina:0.08320)0.585:0.00808,((P_sp_GM01:0.03446,(P_rodasii:0.03822,P_rwandensis:0.02508)1.000:0.01283)1.000:0.01017,((P_sp_At-9b:0.02277,P_cypripedii:0.02222)1.000:0.02576,((P_sp_A4:0.12309,((T_morbirosei:0.08526,(T_sp_NML_06:0.11735,T_ptyseos:0.08439)1.000:0.04102)1.000:0.16336,(E_billingiae:0.08594,(E_pyrifoliae:0.04993,E_tasmaniensis:0.04236)1.000:0.…					(P_dispersa:0.02914,((P_sp_GM01:0.03093,(P_rodasii:0.02002,P_rwandensis:0.01826)1.000:0.01840)1.000:0.01096,((P_cypripedii:0.01641,P_sp_At-9b:0.01716)1.000:0.02292,((P_septica:0.06122,(((P_s_indologenes:0.01419,P_s_stewartii:0.00286)1.000:0.02468,(P_allii:0.01874,P_ananatis:0.01423)1.000:0.01149)1.000:0.05097,((P_conspicua:0.01339,P_brenneri:0.01461)1.000:0.01470,(P_anthophila:0.01981,(P_deleyi:0…					(P_vagans:0.01122,P_sp_aB:0.01295,(P_agglomerans:0.00813,(P_deleyi:0.02398,(P_anthophila:0.01922,((((P_s_stewartii:0.00198,P_s_indologenes:0.00050)1.000:0.02277,(P_ananatis:0.01365,P_allii:0.01836)1.000:0.00988)1.000:0.04650,(P_septica:0.06334,(((P_cypripedii:0.01918,P_sp_At-9b:0.01877)1.000:0.02216,((P_sp_GM01:0.02898,(P_rwandensis:0.01809,P_rodasii:0.01917)1.000:0.01709)0.999:0.00971,((P_wallis…					((P_deleyi:0.02355,(P_anthophila:0.01805,((((P_s_stewartii:0.00200,P_s_indologenes:0.00052)1.000:0.02106,(P_ananatis:0.01261,P_allii:0.01342)1.000:0.01019)1.000:0.03964,(P_septica:0.05063,(((P_sp_At-9b:0.01546,P_cypripedii:0.01496)1.000:0.01884,((P_sp_GM01:0.02754,(P_rodasii:0.01484,P_rwandensis:0.01236)1.000:0.01417)1.000:0.00769,((P_eucrina:0.05536,P_wallisii:0.02265)0.930:0.00593,P_dispersa:0.…

## Sheet: 70 genes
Supplementary File S7.4 Randomised gene subset datasets constructed with 70 genes
Dataset 1					Dataset 2					Dataset 3					Dataset 4					Dataset 5					Dataset 6					Dataset 7					Dataset 8					Dataset 9					Dataset 10
FILE	START POSITION SUPERMATRIX	END POSITION SUPERMATRIX			FILE	START POSITION SUPERMATRIX	END POSITION SUPERMATRIX			FILE	START POSITION SUPERMATRIX	END POSITION SUPERMATRIX			FILE	START POSITION SUPERMATRIX	END POSITION SUPERMATRIX			FILE	START POSITION SUPERMATRIX	END POSITION SUPERMATRIX			FILE	START POSITION SUPERMATRIX	END POSITION SUPERMATRIX			FILE	START POSITION SUPERMATRIX	END POSITION SUPERMATRIX			FILE	START POSITION SUPERMATRIX	END POSITION SUPERMATRIX			FILE	START POSITION SUPERMATRIX	END POSITION SUPERMATRIX			FILE	START POSITION SUPERMATRIX	END POSITION SUPERMATRIX
gene457	1	412			gene965	1	526			gene1026	1	214			gene368	1	303			gene1276	1	853			gene637	1	100			gene732	1	282			gene758	1	134			gene1301	1	651			gene919	1	249
gene788	413	679			gene1181	527	715			gene1183	215	399			gene1169	304	699			gene1023	854	1306			gene643	101	323			gene18	283	427			gene838	135	381			gene1284	652	1436			gene1229	250	308
gene64	680	1024			gene357	716	1134			gene364	400	676			gene1032	700	864			gene949	1307	1681			gene1180	324	651			gene243	428	514			gene1258	382	649			gene790	1437	1690			gene875	309	488
gene814	1025	1228			gene1244	1135	1335			gene1200	677	986			gene638	865	1018			gene712	1682	2040			gene595	652	1814			gene782	515	775			gene63	650	1010			gene426	1691	1965			gene1073	489	895
gene874	1229	1412			gene141	1336	1876			gene996	987	1311			gene988	1019	1326			gene721	2041	2219			gene1239	1815	1950			gene281	776	1161			gene168	1011	1536			gene327	1966	2096			gene1097	896	1254
gene835	1413	2105			gene325	1877	3036			gene471	1312	2250			gene506	1327	2097			gene82	2220	2835			gene224	1951	2194			gene1281	1162	1617			gene923	1537	1780			gene432	2097	2280			gene172	1255	1398
gene318	2106	2390			gene1335	3037	3510			gene998	2251	2442			gene1338	2098	2345			gene144	2836	2973			gene933	2195	2587			gene495	1618	1790			gene815	1781	2025			gene253	2281	2405			gene27	1399	1636
gene380	2391	2712			gene313	3511	3753			gene260	2443	3246			gene704	2346	2734			gene1290	2974	3485			gene42	2588	2743			gene827	1791	2003			gene215	2026	2119			gene377	2406	2787			gene343	1637	1915
gene1108	2713	2896			gene685	3754	4643			gene68	3247	3629			gene808	2735	2864			gene926	3486	3747			gene243	2744	2830			gene514	2004	2813			gene125	2120	2303			gene855	2788	2882			gene624	1916	2369
gene20	2897	3463			gene209	4644	4792			gene727	3630	3856			gene117	2865	2988			gene866	3748	4123			gene459	2831	3386			gene804	2814	2908			gene328	2304	2442			gene813	2883	3237			gene300	2370	2678
gene386	3464	3762			gene1311	4793	5049			gene91	3857	4273			gene1313	2989	3292			gene632	4124	4423			gene296	3387	4257			gene1213	2909	3396			gene348	2443	2877			gene1057	3238	3712			gene1015	2679	2790
gene576	3763	3960			gene35	5050	5314			gene952	4274	4516			gene50	3293	3633			gene1111	4424	4670			gene255	4258	4588			gene890	3397	3668			gene336	2878	3123			gene1270	3713	3945			gene740	2791	3090
gene1316	3961	4153			gene1100	5315	5698			gene377	4517	4898			gene978	3634	4068			gene517	4671	4992			gene181	4589	4904			gene13	3669	4017			gene924	3124	3470			gene1049	3946	4379			gene615	3091	3385
gene300	4154	4462			gene1303	5699	5907			gene571	4899	5032			gene863	4069	4959			gene636	4993	5787			gene1192	4905	5117			gene666	4018	4197			gene556	3471	4164			gene443	4380	4808			gene1075	3386	3816
gene597	4463	4698			gene9	5908	6156			gene144	5033	5170			gene807	4960	5264			gene1008	5788	6023			gene901	5118	5501			gene404	4198	4981			gene1158	4165	4482			gene25	4809	4935			gene150	3817	3927
gene121	4699	5198			gene1089	6157	6548			gene310	5171	5300			gene910	5265	5447			gene653	6024	6462			gene964	5502	5722			gene985	4982	5480			gene797	4483	5014			gene945	4936	5238			gene170	3928	4024
gene263	5199	5667			gene1082	6549	6748			gene785	5301	5448			gene522	5448	5862			gene1214	6463	6756			gene443	5723	6151			gene397	5481	5798			gene691	5015	5540			gene130	5239	5405			gene894	4025	4227
gene507	5668	5848			gene833	6749	7056			gene624	5449	5902			gene1066	5863	6149			gene64	6757	7101			gene456	6152	6706			gene1242	5799	6071			gene324	5541	5749			gene372	5406	5773			gene1207	4228	4574
gene1092	5849	6260			gene641	7057	7134			gene1012	5903	6149			gene339	6150	6469			gene451	7102	7410			gene148	6707	6879			gene1354	6072	6283			gene679	5750	5872			gene280	5774	6191			gene245	4575	4745
gene505	6261	7086			gene587	7135	7345			gene519	6150	6352			gene660	6470	6822			gene758	7411	7544			gene279	6880	7163			gene798	6284	7624			gene418	5873	6274			gene1141	6192	6543			gene442	4746	4832
gene594	7087	7277			gene1170	7346	7430			gene955	6353	6548			gene654	6823	7123			gene1293	7545	7745			gene1158	7164	7481			gene878	7625	8072			gene759	6275	6356			gene182	6544	6983			gene462	4833	4926
gene1239	7278	7413			gene457	7431	7842			gene152	6549	7019			gene478	7124	7631			gene159	7746	7909			gene370	7482	7710			gene1090	8073	8265			gene312	6357	6620			gene239	6984	7219			gene97	4927	5266
gene681	7414	7732			gene354	7843	8198			gene483	7020	7269			gene308	7632	7864			gene197	7910	9209			gene698	7711	8041			gene205	8266	8396			gene357	6621	7039			gene1322	7220	7526			gene552	5267	5628
gene938	7733	7959			gene27	8199	8436			gene13	7270	7618			gene607	7865	8179			gene1253	9210	9399			gene305	8042	8280			gene708	8397	8720			gene49	7040	7339			gene264	7527	7889			gene1310	5629	5775
gene431	7960	8200			gene1214	8437	8730			gene1190	7619	8435			gene864	8180	8427			gene321	9400	9740			gene1051	8281	8572			gene183	8721	9147			gene225	7340	7664			gene1250	7890	8132			gene994	5776	6099
gene1019	8201	8320			gene163	8731	8975			gene124	8436	8645			gene740	8428	8727			gene481	9741	9927			gene713	8573	8778			gene442	9148	9234			gene1188	7665	7754			gene679	8133	8255			gene178	6100	6467
gene851	8321	8515			gene298	8976	9094			gene397	8646	8963			gene1104	8728	9043			gene1262	9928	10219			gene552	8779	9140			gene352	9235	9491			gene716	7755	8217			gene912	8256	8559			gene761	6468	6999
gene556	8516	9209			gene717	9095	9491			gene447	8964	9068			gene279	9044	9327			gene220	10220	10508			gene778	9141	9631			gene1247	9492	9615			gene1301	8218	8868			gene147	8560	8763			gene1028	7000	7060
gene90	9210	9585			gene1245	9492	9700			gene888	9069	9785			gene395	9328	9532			gene50	10509	10849			gene1212	9632	9711			gene1076	9616	9958			gene464	8869	9115			gene58	8764	9048			gene833	7061	7368
gene861	9586	9801			gene918	9701	9782			gene246	9786	9941			gene432	9533	9716			gene881	10850	11075			gene312	9712	9975			gene1071	9959	10033			gene59	9116	9194			gene565	9049	9658			gene272	7369	7863
gene238	9802	10118			gene1318	9783	10226			gene540	9942	10407			gene23	9717	9807			gene710	11076	11425			gene393	9976	10272			gene91	10034	10450			gene47	9195	9427			gene1104	9659	9974			gene217	7864	8091
gene287	10119	10365			gene936	10227	10311			gene1041	10408	10609			gene449	9808	10014			gene525	11426	11661			gene840	10273	10493			gene1322	10451	10757			gene341	9428	9491			gene308	9975	10207			gene1039	8092	8218
gene777	10366	10857			gene1240	10312	10544			gene347	10610	10854			gene374	10015	10481			gene669	11662	11761			gene801	10494	10630			gene654	10758	11058			gene155	9492	9845			gene581	10208	10631			gene1085	8219	9197
gene640	10858	11243			gene1043	10545	10846			gene12	10855	11327			gene75	10482	10599			gene694	11762	11984			gene828	10631	10847			gene845	11059	11358			gene523	9846	10206			gene35	10632	10896			gene1304	9198	9290
gene765	11244	11329			gene1	10847	10993			gene192	11328	11581			gene644	10600	10912			gene823	11985	12715			gene55	10848	11095			gene301	11359	11646			gene177	10207	10505			gene971	10897	11102			gene1019	9291	9410
gene806	11330	11659			gene737	10994	11332			gene1270	11582	11814			gene276	10913	11320			gene610	12716	13078			gene1255	11096	11700			gene7	11647	11857			gene501	10506	10638			gene183	11103	11529			gene638	9411	9564
gene308	11660	11892			gene1098	11333	11639			gene287	11815	12061			gene207	11321	11559			gene1350	13079	13234			gene67	11701	12511			gene797	11858	12389			gene1211	10639	10796			gene17	11530	11820			gene667	9565	9990
gene1045	11893	12472			gene1287	11640	11891			gene965	12062	12587			gene1310	11560	11706			gene136	13235	13430			gene1299	12512	12853			gene1283	12390	12557			gene883	10797	11112			gene10	11821	12005			gene1355	9991	10619
gene723	12473	12801			gene941	11892	12182			gene63	12588	12948			gene180	11707	11864			gene373	13431	13871			gene535	12854	13102			gene787	12558	12847			gene681	11113	11431			gene783	12006	12180			gene762	10620	10915
gene1173	12802	13227			gene1128	12183	12457			gene494	12949	13276			gene70	11865	12271			gene1022	13872	13953			gene940	13103	13499			gene1350	12848	13003			gene905	11432	11536			gene259	12181	13148			gene326	10916	11234
gene1022	13228	13309			gene351	12458	12650			gene886	13277	13426			gene466	12272	12702			gene1256	13954	14136			gene513	13500	13618			gene1175	13004	13104			gene973	11537	11909			gene250	13149	14232			gene963	11235	11744
gene816	13310	13567			gene22	12651	13360			gene1243	13427	13526			gene757	12703	13346			gene1303	14137	14345			gene598	13619	14032			gene785	13105	13252			gene1138	11910	12349			gene1103	14233	14475			gene384	11745	12069
gene1346	13568	14032			gene1137	13361	14334			gene398	13527	14023			gene1345	13347	13485			gene465	14346	14591			gene784	14033	14279			gene1356	13253	13395			gene960	12350	12718			gene196	14476	15056			gene1348	12070	12582
gene750	14033	14251			gene1225	14335	14663			gene506	14024	14794			gene846	13486	14060			gene971	14592	14797			gene1336	14280	14858			gene538	13396	13608			gene164	12719	13317			gene1354	15057	15268			gene1165	12583	12805
gene441	14252	14476			gene894	14664	14866			gene596	14795	15193			gene507	14061	14241			gene385	14798	15430			gene1055	14859	15049			gene456	13609	14163			gene53	13318	13573			gene254	15269	15547			gene474	12806	13096
gene394	14477	14585			gene376	14867	15248			gene688	15194	15531			gene396	14242	14911			gene1005	15431	15590			gene635	15050	15232			gene1028	14164	14224			gene1037	13574	13734			gene474	15548	15838			gene211	13097	13229
gene378	14586	14695			gene364	15249	15525			gene811	15532	15809			gene980	14912	15078			gene803	15591	15909			gene819	15233	15528			gene1230	14225	14390			gene454	13735	14212			gene1263	15839	15990			gene888	13230	13946
gene817	14696	14901			gene826	15526	15718			gene1009	15810	16709			gene1248	15079	15173			gene543	15910	16132			gene727	15529	15755			gene325	14391	15550			gene383	14213	14351			gene607	15991	16305			gene635	13947	14129
gene485	14902	15289			gene119	15719	15989			gene1180	16710	17037			gene1296	15174	15288			gene1120	16133	16381			gene38	15756	16108			gene121	15551	16050			gene66	14352	14755			gene1013	16306	16631			gene950	14130	14192
gene909	15290	15599			gene56	15990	16325			gene538	17038	17250			gene927	15289	15407			gene1154	16382	17073			gene1160	16109	17016			gene1191	16051	16247			gene1086	14756	14884			gene684	16632	16695			gene237	14193	14623
gene74	15600	15817			gene640	16326	16711			gene466	17251	17681			gene398	15408	15904			gene560	17074	17292			gene1222	17017	17474			gene616	16248	16459			gene1015	14885	14996			gene617	16696	17121			gene305	14624	14862
gene809	15818	16309			gene1235	16712	16815			gene248	17682	17954			gene766	15905	16198			gene281	17293	17678			gene454	17475	17952			gene451	16460	16768			gene202	14997	15442			gene503	17122	17315			gene152	14863	15333
gene1179	16310	16638			gene91	16816	17232			gene531	17955	18206			gene1004	16199	16342			gene851	17679	17873			gene1142	17953	18567			gene228	16769	17409			gene224	15443	15686			gene402	17316	17551			gene757	15334	15977
gene659	16639	16850			gene669	17233	17332			gene533	18207	18479			gene529	16343	16675			gene537	17874	18056			gene1151	18568	18743			gene241	17410	17792			gene92	15687	16052			gene153	17552	17714			gene1225	15978	16306
gene709	16851	17725			gene665	17333	17648			gene153	18480	18642			gene1351	16676	16755			gene943	18057	18265			gene1066	18744	19030			gene257	17793	18069			gene108	16053	16259			gene521	17715	18144			gene491	16307	16562
gene105	17726	17881			gene395	17649	17853			gene1346	18643	19107			gene744	16756	17154			gene680	18266	18439			gene629	19031	19270			gene138	18070	18498			gene340	16260	16391			gene682	18145	19448			gene765	16563	16648
gene276	17882	18289			gene595	17854	19016			gene716	19108	19570			gene796	17155	17416			gene386	18440	18738			gene594	19271	19461			gene1330	18499	18926			gene1067	16392	16685			gene844	19449	19748			gene492	16649	17329
gene171	18290	18840			gene475	19017	19150			gene418	19571	19972			gene558	17417	17508			gene1133	18739	18999			gene193	19462	19710			gene425	18927	19388			gene424	16686	16918			gene248	19749	20021			gene269	17330	17481
gene1164	18841	19491			gene1149	19151	19320			gene745	19973	20331			gene689	17509	17896			gene648	19000	19148			gene1106	19711	19851			gene367	19389	19486			gene1195	16919	17295			gene614	20022	20358			gene1346	17482	17946
gene1111	19492	19738			gene1010	19321	19772			gene268	20332	20668			gene1332	17897	18167			gene873	19149	19248			gene782	19852	20112			gene673	19487	19791			gene1043	17296	17597			gene761	20359	20890			gene807	17947	18251
gene332	19739	19955			gene1342	19773	20119			gene868	20669	21089			gene768	18168	18403			gene1093	19249	19469			gene202	20113	20558			gene1024	19792	20057			gene941	17598	17888			gene738	20891	20987			gene366	18252	18425
gene1162	19956	20107			gene578	20120	20439			gene724	21090	21187			gene950	18404	18466			gene738	19470	19566			gene178	20559	20926			gene839	20058	20445			gene351	17889	18081			gene927	20988	21106			gene1316	18426	18618
gene1114	20108	20197			gene24	20440	20693			gene162	21188	21604			gene714	18467	18776			gene347	19567	19811			gene707	20927	21126			gene450	20446	21305			gene936	18082	18166			gene981	21107	21367			gene83	18619	19110
gene677	20198	20449			gene398	20694	21190			gene732	21605	21886			gene970	18777	19169			gene303	19812	20299			gene129	21127	21360			gene867	21306	21394			gene755	18167	18375			gene476	21368	21595			gene1330	19111	19538
gene850	20450	20691			gene1106	21191	21331			gene915	21887	22071			gene1045	19170	19749			gene524	20300	20727			gene1223	21361	21499			gene545	21395	22036			gene1005	18376	18535			gene119	21596	21866			gene940	19539	19935
gene309	20692	21197			gene573	21332	21700			gene953	22072	22415			gene840	19750	19970			gene954	20728	21019			gene1134	21500	21717			gene1274	22037	22235			gene446	18536	18691			gene202	21867	22312			gene986	19936	20106
gene399	21198	21389			gene536	21701	23196			gene1204	22416	22612			gene1175	19971	20071			gene827	21020	21232			gene191	21718	21867			gene1263	22236	22387			gene174	18692	18879			gene735	22313	22497			gene565	20107	20716
gene1216	21390	21578			gene570	23197	23297			gene106	22613	22925			gene313	20072	20314			gene696	21233	21553			gene1165	21868	22090			gene1146	22388	22890			gene1171	18880	18982			gene1306	22498	22694			gene932	20717	21397
gene899	21579	21798			gene801	23298	23434			gene167	22926	23508			gene419	20315	20528			gene925	21554	21968			gene827	22091	22303			gene912	22891	23194			gene560	18983	19201			gene634	22695	23339			gene1261	21398	21473
gene827	21799	22011			gene471	23435	24373			gene877	23509	24420			gene1097	20529	20887			gene1158	21969	22286			gene288	22304	22702			gene410	23195	23787			gene79	19202	19750			gene1025	23340	23770			gene1140	21474	21613
Data matrix					Data matrix					Data matrix					Data matrix					Data matrix					Data matrix					Data matrix					Data matrix					Data matrix					Data matrix
>E_billingiae					>P_rwandensis					>P_wallisii					>P_cypripedii					>P_eucrina					>P_vagans					>T_morbirosei					>P_anthophila					>T_sp_NML_06					>P_cypripedii
MTTGGQAQIGNVDLVKQLNSAAVYRLIDQQGPISRIQIAEHSQLAPASVTKITRQLIERGLIKEVDQQASTGGRRAISIITETRGFHTIGVRLGRSDATLTLFDLSGKSLAQEDYALPERTQETLENALFNAIASFSEQHQRKVRELIAISVILPGLVDPNNGVIKYMPHIHVHHWPLVANLQKRFNVTSFVGHDIRSLALAEHYFGASRDCADSILVRVHRGTGAGIIANGHIFLGSNGNVGELGHIQVDALGERCHCGNFGCLETIAANGAIENRVRHLLTQGYPSSLTLDDCQMPKICKAANRGDALAVEVIDYVGRHLGKAIAIAINLFNPQKVVIAGEITEADKVLLAAIEGCINTQVLKAFRKNLPVVRSEIDHRSAIGAFALAKRAMLNGIL…					MTTENIHKHRILILDFGSQYTQLVARRVRELGVYCELWAWDVTEEQIRSFNPNGIILSGGPESTTEHNSPRAPEYVFNAGVPVLGVCYGMQTMAMQLGGKVEGSNEREFGYAQVEVMTQSALVRDIEDAISAAGKPLLDVWMSHGDKVTAIPAGFETVASTETCPFAIMANEEKKFYGVQFHPEVTHTRQGLRMLERFIRDICGCEALWTPAKIIEDAVERLRVQCGNDNVILGLSGGVDSSVTAMLLHRAIGDRLTCVFVDNGLLRLNEAEQVMDMFGDHFGLNIVHVAAEDRFLDALAGENDPEAKRKIIGRVFVEVFDQEALKLDDVKWLAQGTIYPDVIESAASATGKAHVIKSHHNVGGLPKEMKMGLVEPLKELFKDEVRKIGLELGLPYDML…					-------------------------------------------MPLLDSFTVDHTIMGAPAVRVAKTMNTPHGDTITVFDLRFCRPNIDILTERGIHTLEHLFAGFMRNHLNGDGVEIVDISPMGCRTGFYMSLIGTPDEQRVAKAWKGAMEDVLKVKDQNQIPELNEYQCGSYKLHSLDEAQQIARNVLAHEIGVNRNEDLKLPPEKLKELHI------------LLVSALLATSLPALALTGDSDKPVNIDSV					MLWFKNMMVYRLNRDIPLSADDLEKQLDAFTFSPCGSQDMAKTGWVSPMGNRSEALTHVINGQIVICARTEQKILPSPVVKQALEAKIDKLEAEQSRKLKKTEKDSLKDEVLHSLLPRAFSRFSQTFMWIDTVNNLIIVDCASAKKAEDTLALLRKSLGSLPVVPLTLEKPIEMTLTEWVRSGELPAGFALMDEAELKAQLEDGGVIRCKKQDLVSDEIATHIEAGKVVTKLALDWQERIQLVIADDASVKRLKFSDTLREQNDDIDRDDFAQRFDADFILMTSELAALISNLVEALGGEAQRMKFVDEATILVVAGDGGNGCVSFRREKYIPKGGPDGGDGGDGGDVYLLADENLNTLIDYRFEKSFRAERGQNGQSRDCTGKRGKDIIVKVPVGTRV…					---------------LLGAGTVYGLYKYIEPQLPDVNTLKDVRLQTPMQVYSADGELIAQYGEKRRVPLTLKQMPPELIKAFIATEDSRFYEHHGVDPVGIFRAASIALMSGHASQGASTITQQLARNFFLSPERTLMRKIKEAFLAIRIEQLLSKDEILELYLNKIYLGYRAYGVGAAAQVYFGKTVDQLSLSEMAMIAGLPKAPSTFNPLYSHSRALARRNVVLARMLDQNDITQQQYEEARNTPLTASYHGP					MALTKAEMSEYLFEKLGLSKRDAKELVELFFEEVRRALENGEQVKLSGFGNFDLRDKNQRPGRNPKTGEDIPITARRVVTFRPGQKLKSRVENATPKETDMFTGIVQGTAEIVSIEEKELFRTHTVRLPEELLPGLALGASVAHNGCCLTVTAIEGDRVSFDLIKETLRVTNLGDLRQGDVVNIERAAKFSDEIGGHLMSGHIMTTAEICKIIQSEHNREVWFKIQDPMQMKYILHKGFVGIDGISLTVGDVTKTKFCVYLIPETLERTTLGAKTFGDRVNIEIDPHTQAIVETVERVLAQRDAAAAMSMLTGQPAAES----MSYQQPTA-FDFQQAGKTVLRIEREGLEQLDQYINDDFARACALIYACQGKVVVMGMGKSGHIGKKMAATFASTGT…					MQAQTLQRKVLRTICPDAKGLIAKITNICYKHELNIVQNNEFVDHRTGRFFMRTELEGIFNDTTLLADLDSALPGGSVRELQPAGRRRVVIMVTKEAHCLGDLLMKSTFGGLDMEIAAVIGNHETLRSLVERFDIPFVLVSHEGLTREDHDMRMADEIERYQPDYVVLAKYMRVLTPEFVKRFPNQIINIHHSFLPAFIGARPYHQAYERGVKIIGATAHYVNDNLDEGPIIMQDVIHVDHSFTADDMMRAGRDVEKNALSRALDKVLAQRVFVYGNRTIILMIALIQRVTRACVTVEGEITGQIAAGLLVLLAVEKDDDEKKAQRLAERVLGYRVFSDDQGKMNLSLQQANGSLLVVSQFTLAADTQKGMRPSFSGGATPELARQLYDYFSDCCRGQG…					-------------------MSITRIDP-EHRMSEAVIHNDTIYYTSVPENLDADAEAQTANALAVIDAMLTRLGSDKSKILDATLFLVDKADFPAMNRAWDAWVSPGNAPVRCTVQAGLLNPKYKIEIKIIAARMLKRVFIGLLFIILVMVATALGLDRWISWKTAPFIYENVSSLPHRQVGVVLGTAKYYRTGVINQYYLYRMQGALNAYNSGKVNYLLLSGDNALQSYNEPMTMRRDLIKAGVDPADIVLDYA					---------------------MAKEKKRGFFSWLGFGRDEEKQEQQETSEVNTPESASTESPASHQETPDEPLNTQHPEPSPHSGDTAAVEETAEHPVATAPVTLPDTDVTE-----PEPLVEPELPGM-NSGDSAPAVPA------ASEIASPAVQRVEVEQSLPTAL----PDE-------PQ----ETLPEPTEQLPLSPQAPVKEPEVL------------------------------------PEPEPE					MQMWKWLNQWAKPEKLYQLCGRLIPWFAVLGVATLLLGWAWGFGFAPADYQQGDSFRIMYIHVPAAMWSMGVYASMAIAAFIGLVWQMKMADLVSAAMAPVGAVFTFIALITGSAWGKPMWGTWWIWDARLTSELVLLFLYMGVIALYHAFDDRRTAGRAAGILILVGVINLPIIHFSVQWWNTLHQGSSGILQQDIAPSMRTPLRWAILGYLLVFISLTLMRLRNMILFTERHRPWAIEV-AQGGRKSMAKTIKITQTRSSIGRLPKHKATLVGLGLRRIGHTVEREDTPAVRGMINAISYMLKVEE---------------------MHAFAKRETQMYPEEPVYLPPRYRGRIVLTRDPDGQERCVACNLCAVACPVGCISLQKAEMQDGRWYPEF…
>P_allii					>P_allii					>P_sp_aB					>P_wallisii					>P_rodasii					>P_sp_At-9b					>P_vagans					>P_dispersa					>P_sp_aB					>P_eucrina
MTTGGQTQIGNVDLVKQLNSAAVYRLIDQQGPISRIQIADLSQLAPASVTKITRQLIERGLIKEVEQQASTGGRRAISIVTETRHFHTIGVRLGRNDATLTLFDLSGKSLAQQDYPLPQTTQETLELALFEAIAHFIQQSEAKIRELIAISVILPGLVDPLNGVIRYMPHINVDQWPLVANLKNRFNVTSFVGHDIRSLALAEHYFGATRDCADSILVRLHRGTGAGIIANGQIFLGSNGNVGEIGHIQVDPLGERCHCGNFGCLETLAANGAIEHRVKELLNKGYPSVLTQDACQMPQICQAANQGDALASEVIEHVGRYLGKAIAIAINLFNPQKIVLAGEITEAERVLLPAIESCINTQALAAFRKNLPVVRSQLDHRSAIGAFALAKRAMLNGIL…					MTTENIHKHRILILDFGSQYTQLVARRVRELGVYCELWAWDVTEAQIRQFNPSGIILSGGPESTTENDSPRAPDYVFTAGVPVLGVCYGMQTMAMQLGGKVEGSNEREFGYAQVEVNTASALIRDIEDAISAAGKPLLDVWMSHGDKVTAIPDGFVTVASTETCPFAIMANEEKRFYGVQFHPEVTHTRQGLRMLERFVMDICECEALWTPAKIIEDAVERLRVQVGNDKVILGLSGGVDSSVTAMLLHRAIGKNLTCVFVDNGLLRLNEAEQVLDMFGDHFGLNIVHVDGEARFLNALAGENDPEAKRKIIGRVFVEVFDEQALRLQDVKWLAQGTIYPDVIESAASATGKAHVIKSHHNVGGLPKEMKMGLVEPLRELFKDEVRKIGLELGLPYDML…					-------------------------------------------MPLLDSFTVDHTIMGAPAVRVAKTMKTPHGDTITVFDLRFCRPNIDILTERGIHTLEHLFAGFMRDHLNGDGVEIVDISPMGCRTGFYMSLIGTPDEQRVAKAWKGAMEDVLKVKDQNQIPELNEYQCGSYKLHSLDEAQQIARNVLAHEIGVNRNDDLKLPAEKLKELHIMKFKMNKNSLKLLMASMLLATSVPALALTGDSDKPVNIDSQ					MLWFKNMMVYRLNRDIPLSADDLEKQLDAFTFSPCGSQDMAKTGWVSPMGNRSEALTHVINGQIVICARTEQKILPSPVVKQALEAKIEKLEAEQSRKLKKTEKDSLKDEVLHSLLPRAFSRFSQTFMWIDTVNNLIIVDCASAKKAEDTLALLRKSIGSLPVVPLTLENPIELTLTEWVRSGEMPAGFTLMDEAELKAILEDGGVIRCKKQDLISDEIATHIEAGKVVTKLALDWQERIQFVIADDASVKRLKFSDTLREQNDDIDRDDFAQRFDADFILMTSELAALISNLVEALGGEAQRMKFVDEATILVVAGDGGNGCVSFRREKYIPKGGPDGGDGGDGGDVYLLADENLNTLIDYRFEKAFRAERGQNGQSRDCTGKRGKDVTIKVPVGTRV…					-----------VCCILLGAGTVYGLYKYIEPQLPDVNTLKDVRLQTPMQVYSADGELIAQYGEKRRVPLTLQQMPPELIKAFIATEDSRFYEHHGVDPVGIFRAASVALVSGHASQGASTITQQLARNFFLSPERTLMRKIKEAFLAIRIEQLLTKDEILELYLNKIYLGYRAYGVGAAAQVYFGKPVDQLSLSEMAMIAGLPKAPSTFNPLYSHTRALSRRNVVLARMLDQNYITQQQYTDARNTPLVATYHGP					MALTKAEMSEYLFEKLGLSKRDAKELVELFFEEVRRALENGEQVKLSGFGNFDLRDKNQRPGRNPKTGEDIPITARRVVTFRPGQKLKSRVENATPKDADMFTGIVQGTAEIVAIEEKELFRTHVVKLPEELLPGLALGASVANNGCCLTVTAIEGDLVSFDLIKETLRITNLGELQVGNVVNIERAAKFSDEIGGHLMSGHIMTTAEICKIIQSENNREVWFKLQDPAQIKYILHKGFVGIDGISLTVGDVTKSKFCVHLIPETLERTTLGAKKLGHKVNIEIDPHTQAIVETVERVLAQREAAALAQHPSDESE-------MSHQRLD--FDFQQAGKAVLRIEREGLEQLDQYINDDFSRACEMIFACRGKVVVMGMGKSGHIGKKMAATFASTGT…					MQAQTMQRKVLRTICPDAKGLIAKITNICYKHELNIVQNNEFVDHRTGRFFMRTELEGIFNDNTLLADLDSALPQGSVRELHSAGRRRVVILVTKEAHCLGDLLMKSAFGGLDMEIAAVVGNHDTLRSLVERFDIPFVLVSHEGLTREEHDNRMVEEIDRYQPDYVVLAKYMRVLTPAFVQRYPNQIINIHHSFLPAFIGARPYHQAYERGVKIIGATAHYVNDNLDEGPIIMQDVINVDHSYTADEMMRAGRDVEKNVLSNALYKVLGQRVFVYGNRTIILMIALIQRVQRASVSVDQNVIGEIGAGLLVLLGVEKGDDNARAERLAERVLGYRIFSDEQGKMNLSVRQAGGSVLVVSQFTLAADTQKGMRPSFSGGAEPAEAERLYDYFSDYCCQQG…					-------------------MTITRIDA-EHRMSEAVVHDQTVYYTSVPENLDDDAEAQTANALAVIDRILTRVGSDKSKILDATLFLVDKEDFAAMNRAWDAWVSPGNAPVRCTVQAGLMNPRYKVEIKIIAALILKRVFFALFIIILLVMATALGLDRWISWRTAPFIYEDVASLPHRQVGVVLGTAKYYRTGVINQYYLYRIQGALNAYNSGKVNYLLLSGDNALQSYNEPMTMRRDLIKAGVDPSDIVLDYA					---------------------MAKEKKRGFFSWLGFGKEEEKQPVAEEQ------THEVAEPAQQQTEQEAP---ALSQAEAQAEETVAITETVAEQQREADVT-----AAA-----PHESAPAVLDEA-EPIEADPEALL---DVSAPEHDATPVIDAD-DVVTPIAD----DAS-------AD----APLSEEELTALALGDAPIIEIPDA------------SADAPLSDEELTALALGDAPIVETPHSEAD					--MWKWIHQWARPERLYQLCGRLIPGMAIAAAGALLLGWGWGFGFAPADYQQGNSFRIMYLHVPAAMWSMGIYAAMAIAAFTGLVWQLKMADLAAAAMAPVGAAFTFIALITGSAWGKPMWGTWWIWDARLTSELVLLFLYMGAMALWLAFDDRRTAGRAAGILILVA-------------W-------------------------------------------------------------------MAKTIK
>E_tasmaniensis					>P_sp_A4					>P_sp_GM01					>P_sp_A4					>P_ananatis					>P_septica					>P_s_indologenes					>P_cypripedii					>E_pyrifoliae					>P_ananatis
MTTGGQAQIGNIDLVKQLNSAAVYRLIDRQGPISRIQISDLSQLAPASVTKITRQLIERGLIREVDQQASTGGRRAISIITETRAFNTIGVRLGRSDATIMLFDLSGKSLAEELYPLPQRTQETLEDALFEAIADFCERYQRKLRELIAISVTLPGLVDPFNGMIRCMPHISVNDWPLVARLEERFGLTSFVGHDIRSLALAEHYFGASRDCSDSILVRVHRGTGAGIIANGAIFLGSNGNVGEIGHIQVDPLGERCHCGNFGCLETIAANHAIENRVRHLLTQGYPSSLTLDRCQMQQICQAANGGDALASEVIEHVGRHLGKAIAIAINLFNPQKIVIAGEITAADKVLLPAIQGCINTQALKAFRINLPVVRSQVDHRSAIGAFALAKRAMLNGIL…					MTAENIHKHRILILDFGSQYTQLVARRVRELGVYCELWAWDVTEEQIRSFNPTGIVLSGGPESTTEHNSPRAPEYVFNAGVPVLGVCYGMQTMAMQLGGKVEGSTEREFGYAQVEVITPSALVRDIEDAISDAGKPLLDVWMSHGDKVTAIPSDFVTVASTESCPFAIMANEEKRFYGVQFHPEVTHTRQGQRMLERFVLDICGCEALWTPAKIIEDAVERIREQVGEDKVILGLSGGVDSSVTAMLLHRAIGDRLTCVFVDNGLLRLNEAEQVMDMFGDHFGLNIVHVAAEARFLDALAGENDPEAKRKIIGRVFVEVFDEEALKLTDVKWLAQGTIYPDVIESAASTTGKAHVIKSHHNVGGLPKEMKMGLVEPLKELFKDEVRKIGLELGLPYDML…					-------------------------------------------MPLLDSFTVDHTIMGAPAVRVAKTMKTPHGDTITVFDLRFCRPNIEILTERGIHTLEHLFAGFMRNHLNGDGVEIVDISPMGCRTGFYMSLIGTPDEQRVAKAWKGAMEDVLKVKEQGQIPELNEYQCGSYKLHSLDEAQQIARNVLAHDIGVNRNEDLKLPAEKLKELHIMKFKMNKNSLKLLLVSTLLATSLPALALTGDSDKPVNIDSV					MLWFKNMMVYRLNRDIPLSADEMEKQLEAFTFSPCNSQEMAKTGWVAPMGNRSEALTHVNNGQIIICARKEEKILPSPVIKQALQAKIDKLEAEQSRKLKKTEKDSLKDEVLHSLLPRAFSRFSQTFIWIDSVNNLIAVDCASAKKAEDTLALLRKSLGSLPVVPLTLENPVELTLTQWVRSGDLPAGYALMDEAELKAILEEGGVIRCKKQDLVSDEIAHHIEAGKVVTKLALDWQERIQFVLSDDASIKRLKFSEELREQNDDIDREDAAQRFDADFILMTSELAALIASLTEALGGEAQRMKFVDEAAILVVAGDGGNGCVSFRREKYIPRGGPDGGDGGDGGDVYLQADESLNTLIDYRFEKAFRAERGQNGQSRDCTGKRGKDVIVKVPVGTRV…					VKFVKYLLILAVCCILLGAGSIYGLYKYIEPQLPDVNTLKDVRLQTPMQVYSAEGDLIAQYGEMRRIPLSLQQVPPEMVKAFIATEDSRFYEHHGVDPIGIFRAASVALVSGHASQGASTITQQLARNFFLSPERSLMRKIKEAFLAIRIEQLLNKDEILELYLNKIYLGYRAYGVGAASQVYFGKPVNELSLSEMATIAGLPKAPSTFNPLYSHSRAVARRNVVLARMLDQHYITQQQYDEARNTPLVSTYHGPKIVFAAPYLSEMVRQEMVKRYGNNAYTDGYKVYTTVTRRLQQSAQEAVRNNVMAYDMRHGYRGPTSVLWKVGEPAWGQAQIVKALKDLPLYGPLHPAVVTHVQSDEATVMMKDGSNVSLTMAGVRWARAFKSDTAQGPTPKSIT…					MALTKAEMSEYLFEKLGLSKRDAKELVELFFEEVRRALENGEQVKLSGFGNFDLRDKNQRPGRNPKTGEDIPITARRVVTFRPGQKLKSRVENASPKDNDMFTGIVQGTAKIVSIEEKDLFRTHVAELPEELLPGLALGASVAHNGCCLTVTAIEGNRVSFDLIKETLRVTNLGDLQEGDVVNIERAAKFSDEIGGHLMSGHIMTTAEICKIIQSENNREVWFKIQDPAQMKYILHKGFVGIDGISLTVGEVTKSKFCVYLIPETLERTTLGAKKLGHRVNIEIDPHTQAIVDTVERVLAQREAAALRPDVE-----------MSTQLSNANFDFQTAGKAVLRIEREGLEQLDQYINDDFTRACEMIYRCQGKVVVMGMGKSGHIGKKMAATFASTGT…					MQAQTMQRKVLRTICPDAKGLIAKITNICYKHELNIVQNNEFVDHRTGRFFMRTELEGIFNDNTLLADLDSALPQGSVRELHSAGRRRVVILVTKEAHCLGDLLMKSAFGGLDMEIAAVIGNHETLRSLVERFDIPFVLVSHEGLSREEHDNKMADEIDRYQPDYVVLAKYMRVLTPGFVQRYPNQIINIHHSFLPAFIGARPYHQAYERGVKIIGATAHYVNDNLDEGPIIMQDVINVDHSYTAEEMMRAGRDVEKNVLSRALDKVLGQRVFVYGNRTIILMIALIQRVQRASVSIDHAVVGEIGQGLLILLGVEKGDDEKRAERLAERVLGYRIFSDEQGKMNLNVKQAGGSVLVVSQFTLAADTQKGMRPSFSGGAAPQEAERLYEYFSACCRRHD…					-------------------MTITRIDP-EHRMSEAVVHNQTVYYTSVPENLDEDAEAQTANALAVIDAILTRVGSDKSKILDATLFLVDKADFPAMNRAWDAWVSPGNAPVRCTVQAGLMNPKYKVEIKIIAALMIKRVFFGLLFIILLMVATALGLDRWISWKTAPFIYENVAALPHRQVGVVLGTAKYYRTGVINQYYLYRIQGALNAYNSGKVNYLLLSGDNAQQNYNEPMTMRRDLIKAGVDPADIVLDYA					---------------------MAKNKKRGFFSWLGLGRDEKAQQEEVK-------ETLEQQPSADTPIADNA---TDSISEREAADAVAVTTSVAAQQAENSR------AGE-----LPEAVAPAEPVV-LPVTPDEKHPV------AHQSAAEAIDEAELEALALAAE------P-------VD----KALAAEVVQEPIVVQPEAVNGIIV------------------------------------------					--MWKGLHQLAKPERLYQLCGRLLPWFALASAAVLLLAWVWGFGYAPADYQQGNSFRIMYIHVPAAMWSMGIYSAMAVAAFTGLVWQMKMADLVSAAMAPIGAVFTFIALVTGSAWGKPMWGTWWIWDARLTSELVLLFLYLGVIALYQAFDDRRMAGRAAGVLILVGVINLPIIHFSVQWWNTLHQGSSGLLQQAIAPPMRTPLRWAILGDLLLFITLTLMRLRNLILLTERKRPWAIAL-AKTRSKVMANTIK
>P_rodasii					>P_sp_aB					>T_morbirosei					>P_rodasii					>E_pyrifoliae					>P_cypripedii					>P_sp_At-9b					>P_conspicua					>P_s_stewartii					>P_brenneri
MTTGGQTQIGNVDLVKQLNSAAVYRLIDQQGPISRIQIADLSQLAPASVTKITRQLIERGLIKEVEQQASTGGRRAISIITETRHFHTIGVRLGRNDATLTLFDLSGKSLAQEDYPLPERTQETLENALFNAITAFMAAHQRKIHELIAIAVILPGLVDPINGIIRYMPHITVSHWPLVSSLKKRFNVTSFVGHDIRSLALAEHYFGASRDCADSILVRLHRGTGAGIIANGHIFLGSNGNVGEIGHIQVDPLGERCHCGNFGCLETIAANGAIENRVRHLLNQGYPSTLSLDNCLMPQICRAANQGDALACEVIEYVGRYLGKAIAIAINLFNPQKVVLAGEITDADKVLFPAIEGCINTQALNAFRKNLPVVRSELDHRSAIGAFALAKRAMLNGIL…					MTTENIHKHRILILDFGSQYTQLVARRVRELGVYCELWAWDVTEEQIRQFNPSGIILSGGPESTTELNSPRAPEYVFNAGVPVLGVCYGMQTMAMQLGGTVSGSNEREFGYAQVEVTTPSALVRDIEDAISATGKPLLDVWMSHGDKVTAIPADFVTVASTETCPFAIMANEEKRFYGVQFHPEVTHTRQGLRMLERFIIDICECEALWTPAKIIEDAVERLREQVGNDKVILGLSGGVDSSVTAMLLHRAIGDRLTCVFVDNGLLRLNEAQQVMDMFGDHFGLNIIHVPAEMRFLDALAGIDEPEAKRKTIGRVFVEVFDEEALKLQDVKWLAQGTIYPDVIESAASATGKAHVIKSHHNVGGLPKEMKMGLVEPLKELFKDEVRKIGLELGLPYDML…					-------------------------------------------MPLLDSFTVDHTRMAAPAVRVAKTMNTPHGDTITVFDLRFCIPNKEVMPERGIHTLEHLFAGFMRNHLNGQGVEIIDISPMGCRTGFYMSLIGTPAEQKVADSWKAAMQDVLKVTDQSKIPELNEFQCGTYQMHSLEEAQDIARHIIENDVRVNHNEELALPPETLKELHIMKSKTKTNSIRLLLVATLLGCSLPVLAVTGDSDKPVNITSE					MLWFKNMMVYRLNRDIPLSADDLEKQLDAFTFSPCGSQDMAKTGWVSPMGNRGEALTHEINGQIVICARTEQKILPSPVVKQALEAKIDKLEAEQSRKLKKTEKDSLKDEVLHSLLPRAFSRFSQTFMWIDTVNNLIIVDCASAKKAEDTLALLRKSLGSLPVVPLTLETPIELTLTEWVRSGELPAGFTLMDEAELKAILEDGGVIRCKKQDLISDEIATHIEAGKVVTKLALDWQERIQLVIADDASIKRLKFSDTLREQNDDIDREDFAMRFDADFTLMTGELAALISNLVEALGGEAKRMKFVDEATILAVAGDGGNGCVSFRREKYIPRGGPDGGDGGDGGDVYLVADENLNTLIDYRFEKSFRAERGQNGQSRDCTGKRGKDIVVKVPVGTRV…					VKFVKYLLILAVCCILLGAASIYGLYKYIEPQLPDVATLKDVRLQTPMQVYSADNELIAQYGEKRRIPLTLQEIPPQMVKAFIATEDSRFYEHHGVDPIGIFRAASIALTSGHASQGASTITQQLARNFFLSPERTLMRKIKEAFLAVRIEQTMSKDEILELYLNKIYLGYRAYGVGAAAQVYFGKNVDQLSLSEIAMIAGLPKAPSTFNPLYSHDRAVARRNTVLARMLNQQYITQAQYNEARITPLVANYHAPEIAFSAPWLTEMVRQEMIKRYGENAYTDGYKVYTTVTRKLQLAGQAAVQDNVIAYDMRHGYRGPGGLLWKTGELAWDHAQILNVLKSLPVYGPLFPAVVTASHNDEADATMRDGSNVTLNLASVRWARPYKSDTLQGATPRSVS…					MALTKAEMSEYLFEKLGLSKRDAKELVELFFEEVRRALENGEQVKLSGFGNFDLRDKNQRPGRNPKTGEDIPITARRVVTFRPGQKLKSRVENASPKDADMFTGIVQGKAEIVAIEEKELFRTHIVKLPEELLPGLALGASVANNGCCLTVTAVEGDRVSFDLIKETLRITNLGELQVGDLVNIERAAKFSDEIGGHLMSGHIMTTAEICKIIQSENNREVWFKLQDPAQIKYILHKGFVGIDGISLTVGDVTKSKFCVHLIPETLERTTLGAKKLGHKVNIEIDPHTQAIVETVERVLAQREAATLAQLTSDESE-------MSHQQPD--FDFQQAGRAVLRIEREGLEQLDQYINDDFSRACKMIFACRGKVVVMGMGKSGHIGKKIAATFASTGT…					MQAQTMQRKVLRTICPDAKGLIAKITNICYKHELNIVQNNEFVDHRTGRFFMRTELEGIFNDNTLLADLDSALPVGSVRELNSAGRRRVVILVTKEAHCLGDLLMKSAFGGLDMEIAAVIGNHETLRSLVERFDIPFVLVSHEGLTREEHDNRMADEIDRYQPDYVVLAKYMRVLTPAFVQRYPNQIINIHHSFLPAFIGARPYHQAYERGVKIIGATAHYVNDNLDEGPIIMQDVINVDHSYTAEEMMRAGRDVEKNVLSRALYKVLGQRVFVYGNRTIILMIALIQRVSRASVSVDNAVVGEIGAGLLVLLGVEKGDDEKKAQRLCERVLGYRIFADENDKMNLNVQQAGGGVLVVSQFTLAADTQKGMRPSFSGGAEPAEAERLYDYFSACCREQG…					-------------------MSITRIDP-EHRMSEAVIHNDTIYYTSVPENLEADAEAQTANALAVIDALLTRLGSDKSKILDATLFLVDKADLPAMNRAWDAWVCPDNAPVRCTVQAGLMNPKYKIEIKIIAARMLKRVFIGLLFIILLMVATALGLDRWISWKTAPLIYENVSSLPHRQVGVVLGTAKYYRTGVINQYYLYRMQGALNAYNSGKVNYLLLSGDNALQSYNEPMTMRRDLIKAGVDPADIVLDYA					---------------------MAKEKKRGFFSWLGFGKEEEKQPLTDAQ---------TAQPEAQQPEQEAP---ARSQAETAEQERGAAPENRVEQQQESDAATSEDVPVTARVAWPETAVDPHTGMI-TPVEPADDVND-------EELTALPSAEVELASSAPEQA----PVA-------DD----APLSDDELAALALADADVTDIAPH--DAAIAET-EQADDAPLSDDELAALALADADVTDIAPHDAA					--MWKALHQLGKPERLYQWSGRLIPWFAVTGLASLLLGWIWGFGYAPADYQQGDSFRIIYIHVPAAMWSMGIYASMAIAAFCGLVWQLKMADLASAAMAPVGAVFTFIALVTGSAWGKPMWGTWWIWDARLTSELVLLFIYMGVIALYHAFDDRRTAGRAAGILILVGVVNLPIIHFSVQWWNTLHQA----------------------------------------------RP---AY-CSRPSRRMAKTIK
>P_brenneri					>P_ananatis					>E_billingiae					>E_tasmaniensis					>P_agglomerans					>E_billingiae					>P_dispersa					>E_billingiae					>P_brenneri					>P_rwandensis
MTTGGQSQIGNVDLVKQLNSAAVYRLIDQQGPISRIQIAELSQLAPASVTKITRQLIERGLIKEVDQQASTGGRRAISIITETRNFHTIGVRLGRNDATLTLFDLSGKSLAQEDYALPERTQETLQHALFNAISAFIEQHQRKIRELIAISVILPGLVDPINGVIRYMPHIAVSHWPLVASLKERFNVTSFVGHDIRSLALAEHYFGASRDCADSILVRLHRGTGAGIIANGHIFLGSNGNVGEIGHIQVDPLGERCHCGNFGCLETIAANGAIESRVRHLLNQGYPSVLTLEACQMPQICKAANQGDALACEVIEYVGRYLGKAIAIAINLFNPQKVVLAGEITDAEKVLLPAIEGCINTQALAAFRKNLPVVRSTLDHRSAIGAFALAKRAMLNGIL…					MTTENIHKHRILILDFGSQYTQLVARRVRELGVYCELWAWDVTEEQIRQFNPSGIILSGGPESTTEHGSPRAPDYVFTAGVPVLGVCYGMQTMAMQLGGKVEGSNEREFGYAQVEVNTASALIRDIEDAISAAGKPLLDVWMSHGDKVTAIPADFVTVASTETCPFAIMANEEKRFYGVQFHPEVTHTRQGLRMLERFVIDICECEALWTPAKIIEDAVERLRVQVGNDKVILGLSGGVDSSVTAMLLHRAIGKNLTCVFVDNGLLRLNEAEQVLDMFGDHFGLNIVHVDGEARFLDALAGENDPEAKRKIIGRVFVEVFDEQALRLEDVKWLAQGTIYPDVIESAASATGKAHVIKSHHNVGGLPKEMKMGLVEPLRELFKDEVRKIGLELGLPYDML…					-------------------------------------------MPLLDSFTVDHTIMAAPAVRVAKTMNTPHGDTITVFDLRFCKPNKEVMPERGIHTLEHLFAGFMRNHLNGDGVEIIDISPMGCRTGFYMSLIGTPDEQRVAKAWKGAMQDVLKVTDQRKIPELNEYQCGTFEMHSLDEAQDIARHIIDNDIRVNHNDELALPKDKLQELHIMKSKMQ-NNLKFLALSLLLATSLPALALTGDSDKPVNVDSE					MLWFKNLMVYRLNRDIPLVADEMEKQLDAFSFTPCGSQDMAKTGWVSPLGAHGEDLTHVTNGQILICARKEEKMLPSPVIKQALEAKISKLEAEQSRKLKKTEKDSLKDEVLHSLLPRAFSRFSQTCVWIDTVNNLIMVDCASAKKAEDTLALLRKSLGSLPVVPLTLESPIELTLTEWVRSGELPAGFALMDEAELKAILEDGGVIRCKKQDLVCDEIANHIEAGKLVTKLALDWQERIQMILSDDGSIKRLKFSDILREQNDDIDREDVTGRFDADFILMTGELAALISNTVEALGGEAQRMKFVDEATILVVAGDGGNGCVSFRREKYIPRGGPDGGDGGDGGDVYMQADENLNTLIDYRFEKSFRAERGQNGQSRDCTGKRGNDILIKVPVGTRI…					VKFVKYLLILAVCCILLGAGSIYGLYKYIEPQLPDVNTLKDVRLQTPMQVYSADGDLIAQYGEMRRIPLTLQQVPPVMVKAFIATEDSRFYEHHGVDPVGIFRAASVALVSGHASQGASTITQQLARNFFLSPERTLMRKIKEAFLAIRIEQLLNKDEILELYLNKIYLGYRAYGVGAASQVYFGKPVDQLSLSEMAMIAGLPKAPSTFNPLYSPSRALSRRNVVLARMLDQHYITQQQYDEARNTPLVAKYHGPEIAFSAPYLSEMVRQEMVKRYGENAYTDGYKVYTTVTRRLQEAAQTSVRNNVMAYDMRHGYRGPTSVLWKVGEPAWDQTRIEKALKTLPVYGPLNPAVVTEARSDEATVMLKDGSNVSLALAGVRWARPYKSDTVQGPTPKSVT…					MALTKAEMSEYLFEKLGLSKRDAKELVELFFEEVRRALENGEQVKLSGFGNFDLRDKNQRPGRNPKTGEDIPITARRVVTFRPGQKLKSRVENATPKED-MFTGIVQGTAEVLAIEEKPNFRTHIVRLPAELLPGLELGASVSHNGCCLTVTEVQGDRVSFDLVKETLRITNLGDLNVGDTINVERAAKFSDEIGGHLMSGHIMTTAEISKIITSENNREIWFKPLDAQQMKYILHKGFIGIDGISLTVGEVSKTKFCVHLIPETLARTTLGAKRLGDRVNIEIDPHTQAIVETVERVLAQREAALLAAAASELNE-------MAPGNLEPGFDFQQAGKDVLNIERQGLEQLDQYINDDFTQACQRIFSCSGKVVVMGMGKSGHIGKKMAATFASTGT…					MQAQTMQRKVLRTICPDAKGLIAKITNICYKHELNIVQNNEFVDHRTGRFFMRTELEGIFNDNTLLADLDSALPTGSVRELHSAGRRRVVILVTKEAHCLGDLLMKSAFGGLDMEIAAVIGNHETLRSLVERFDIPFVLVSHEGLTREEHDNRMADEIDRYQPDYVVLAKYMRVLTPAFVQRYPNQIINIHHSFLPAFIGARPYHQAYERGVKIIGATAHYVNDNLDEGPIIMQDVINVDHSYTAEEMMRAGRDVEKNVLSRALYKVLGQRVFVYGNRTIILMIALIQRVTRASVSVDNATVGEIGAGLLVLLGVEKGDDEQKSQRLAEKVLGYRIFGDENDKMNLSVQQTGGSVLVVSQFTLAADTQKGMRPSFSGGAHPAEAERLYHDFSDRCRALG…					-----------------MSKEITRVEPVEHRMSEAVIHNDTVYYTSVPENLDEDAEAQTANALAVIDSLLTRVGSDKSKILDATIFLVHKEDFQAMNRAWDAWVSPGNAPVRCTVQANLMNPKYLVEIKIIAALMVKRLIYGLIIIITLMVLTALGLDRWMSWKTAPYIYENLKSLPHRQVGVVLGTAKYYRGGGINQYYLYRMQGALNAYNSGKVNYLLLSGDNALHSYNEPMTMRKDLIAAGVDPADIVLDYA					---------------------------------------------------------------------------------------------------------------------------------------------------------------------------------------------------------------------------------------------------------------					MQMWKWLHQWGKPERLYQLCGRLIPWFAVLGVATLLLGWVWGFGFAPADYQQGDSFRIMYIHVPAAMWSMGVYASMAIAAFIGLVWQMKTADLVSAAMAPVGAVFTFIALITGSAWGKPMWGTWWIWDARLTSELVLLFLYMGVIALYHSFDDRRTAGRAAGILILVGVVNLPIIHFSVQWWNTLHQGSSGILQQAIAPSMRTPLRWAILGYLLVFVALTLMRLRNLILFTERHRPWAIDV-AQGGRKAMAKTIKITQTRSSIGRLPKHKATLIGLGLRRIGHTVEREDTPAVRGMVNAISYMLKVEEMTLKDIVVGFGTTVRSIWMIGMHAFAKRETQMYPEEPVYLPPRYRGRIVLTRDPDGEERCVACNLCAVACPVGCISLQKAETKDGRWYPEF…
>P_dispersa					>P_conspicua					>P_s_stewartii					>P_anthophila					>P_s_stewartii					>P_wallisii					>E_billingiae					>P_brenneri					>T_ptyseos					>P_septica
MTTGGQTQIGNVDLVKQLNSAAVYRLIDQQGPISRIQIAELSQLAPASVTKITRQLIERGLIKEVEQQASTGGRRAISIITETRHFHTIGVRLGRNDATLTLFDLSGKSLAQEDYPLPERTQETLENALFNAISAFMSAHQRKIHELIAIAVILPGLVDPINGIIRYMPHIAVSHWPLVASLKKRFNVTSFVGHDIRSLALAEHYFGASRDCADSILVRLHRGTGAGIIANGHIFLGSNGNVGEIGHIQVDPLGERCHCGNFGCLETIAANGAIENRVRHLLNQGYPSSLTLDDCQMPQICRAANQGDALACEVIEYVGRYLGKAIAIAINLFNPQKVVLAGEITDADKVLFPAIEGCINTQALNAFRKNLPVVRSELDHRSAIGAFALAKRAMLNGIL…					MTTENIHKHRILILDFGSQYTQLVARRVRELGVYCELWAWDVTEEQIRQFNPSGIILSGGPESTTELNSPRAPEYVFSAGVPVLGVCYGMQTMAMQLGGKVSGSSEREFGYAQVEVTTPSALVRGIEDAISAAGKPLLDVWMSHGDKVTAIPDDFVTVASTETCPFAIMANEEKRFYGVQFHPEVTHTRQGLRMLERFIIDICECEALWTPAKIIEDAVERLREQVGNDKVILGLSGGVDSSVTAMLLHRAIGDRLTCVFVDNGLLRLNEAQQVMDMFGDHFGLNIIHVPAEMRFLDALAGIDEPEAKRKTIGRVFVELFDEEALKLQDVKWLAQGTIYPDVIESAASATGKAHVIKSHHNVGGLPKEMKMGLVEPLKELFKDEVRKIGLELGLPYDML…					-------------------------------------------MPLLDSFTVDHTIMAAPAVRVAKTMKTPHGDTITVFDLRFCRPNIDILTERGIHTLEHLFAGFMRNHLNGDGVEIVDISPMGCRTGFYMSLIGAPDEQRVAQAWKGAMEDVLKVKDQNQIPELNEYQCGSYKLHSLDEAQQIARNVLAQEIGVNHNDDLKLPAEKLKELHIMKFKMNKNSIKFLLASLLLAASLPALALTGDSDKPVNIDSE					MLWFKNMMVYRLNRDIPLSADEMEKQLDAFTFSPCGSQDLSKTGWVSPMGNRSDALTHENNGQIVICARKEEKILPAPVVKQALEAKIDKLESEQSRKLKKTEKDSLKDEVLHSLLPRAFSRFSQTYLWIDTVNNLIMVDCASAKKAEDTLALLRKSLGSLPVVPLTLESPIELTLTEWVRSGDLPAGFALMDEAELKALLEDGGVIRCKKQDLVCDEIANHIEAGKLVTKLALDWQERIQFVLADDGSVKRLKFSDTLRDQNDDIDREDFAQRFDADFILMTSELAALTSNLVEALGGEAQRMKFVDEATILVVAGDGGNGCVSFRREKYIPKGGPDGGDGGDGGDVYLIADENLNTLIDYRFEKSFRAERGQNGQSRDCTGKRGKDIEIKVPVGTRV…					VKFVKYLLILAVCCILLGAGSIYGLYKYIEPQLPDVNTLKDVRFQTPMQVYSADGDLIAQYGEMRRIPLSLQQVPPDMVHAFIATEDSRFYEHHGVDPIGIFRAASVALVSGHASQGASTITQQLARNFFLSPERSLMRKVKEAFLAIRIEQLLNKDEILELYLNKIYLGYRAYGVGAASQVYFGKPVGELSLSEMATIAGLPKAPSTFNPLYSHSRAVARRNVVLARMLDQKYITQQQYNEARNAPLVASYHGPKIVFSAPYLTEMVRQEMVKRYGDNAYTDGYKVYTTVTRRLQESAQEAVQNNVIAYDMRHGYRGPTSVLWKVGEPAWGQTQIVKALKNLPLYGPLHPAVVTHVQSDEATVMMKDGSNVSLTMAGVRWARAFKSDTVQGPTPKSIA…					MALTKAEMSEYLFEKLGLSKRDAKELVELFFEEVRRALENGEQVKLSGFGNFDLRDKNQRPGRNPKTGEDIPITARRVVTFRPGQKLKSRVENASPKDADMFTGIVQGTAEIVAIEEKELFRTHIVRLPEELLPGLALGASVAHNGCCLTVTAIEGDRVSFDLIKETLRITNLGELQVGDIVNIERAAKFSDEIGGHLMSGHIMTTAEICKIIQSENNREVWFKLQDAAQIKYILHKGFVGIDGISLTVGDVTKSKFCVHLIPETLERTTLGAKKLGHKVNIEIDPHTQAIVETVERVLAQRDAAAMLSQVQPDSAE------MLQQQAD--FDFQQAGKAVLRIEREGLEQLDQYINADFNRACEMIFACRGKVVVMGMGKSGHIGKKMAATFASTGT…					MQAQTLQRKVLRTICPDAKGLIAKITNICYKHELNIVQNNEFVDHRTGRFFMRTELEGIFNDTTLLADLDSALPTGSIRELNSAGRRRIVILVTKEAHCLGDLLMKSTYGGLDVEIAAVIGNHETLRTLVERFDIPFILVSHEGLSREDHDNNMAAEIDRYQPDYVVLAKYMRVLTPGFVQRYPNQIINIHHSFLPAFIGARPYHQAYERGVKIIGATAHYVNDNLDEGPIIMQDVIHVDHTYTAEDMMRAGRDVEKNALSRALYQVLAQRVFVYGNRTIILMIALIQRALSASVTVAGETTGEIGPGLLILLGVEKGDDQQKAQRLCDRVLGYRIFGDENDKMNLNVQQAGGSLLVVSQFTLAADTQKGMRPSFSGGADPADAERLYESFISCCREKG…					-------------------MSITRIDP-EHRMSEAVIHNDTIYYTSVPENLDEDAEAQTANALAVIDRLLTRLGSDKSKILDATLFLVDKADLPAMNRAWDAWVSPDNAPVRCTVQAGLMNPQYKIEIKIIAARMLKRVFIGLLFIILLMVATALGLDRWISWKTAPFIYENVSSLPHRQVGVVLGTAKYYRTGVINQYYLYRMQGALNAYNSGKVNYLLLSGDNALQSYNEPMTMRRDLIKAGVDPADIVLDYA					---------------------MAKEKKRGFFSWLGFGRDEEKNAEPEEQ------QKETADVTAEPGVPAEP---EHVTDLPTKEETAGEDESALKTAAGSETP-VEETSGL-----TETGGEHRVHDA-APVPDVAETVH----KTEPEKAEVPESKPLVSDADKAAL----SEP-------VE----PELPGTIIEQPQSVAPVTQSITAP-----------------------------AIERVEAEQPTPE					--MWKWLHQLGRPERLYQLCGRLIPWFAVAGAATLLLGWIWGFGFAPADYQQGDSFRIMYIHVPAAMWSMGVYAAMAVAAFIGLVWQMKMADLVSAAMAPVGAVFTFIALITGSAWGKPMWGTWWIWDARLTSELVLLFLYMGVIALYQSFDDRRTAGRAAGILILVGVVNLPVIHFSVQWWNTLHQGSSGILQQAIAPSMRTPLRWAILGYLLLFVTLTLMRLRNLILYTERHRPWVANL-ANGGRKAMAKTIK
>P_eucrina					>P_eucrina					>P_rwandensis					>E_pyrifoliae					>P_wallisii					>P_dispersa					>P_sp_GM01					>P_wallisii					>P_dispersa					>T_sp_NML_06
MTTGGQTQIGNVDLVKQLNSAAVYRLIDQQGPISRIQIADLSQLAPASVTKITRQLIERGLIKEVEQQASTGGRRAISIITETRHFHTIGVRLGRNDATLTLFDLSGKSLAQEDYPLPERTQETLENALFNAISAFINVHQRKIHELIAIAVILPGLVDPVKGIIRYMPHIAVSHWPLVASLQQRFSVTSFVGHDIRSLALAEHYFGASRDCADSILVRLHRGTGAGIIANGQIFLGSNGNVGEIGHIQVDPLGERCHCGNFGCLETIAANGAIENRVRHLLNQGYPSTLSLDNCLMPQICHAANQGDALACEVIEYVGRYLGKAIAIAINLFNPQKVVLAGEITDADKVLFPAIESCINTQVLREFRKNLPVVRSQLDHRSAIGAFALAKRAMLNGIL…					MTTENIHKHRILILDFGSQYTQLVARRVRELGVYCELWAWDVTEEQIRAFNPNGIILSGGPESTTELDSPRAPEYVFNAGVPVLGVCYGMQTMAMQLGGKVEGSNEREFGYAQVEVTTQSALVRDIEDAISAAGKPLLDVWMSHGDKVTAIPADFVTVASTETCPFAIMANEEKKFYGVQFHPEVTHTRQGLRMLERFIRDICGCEALWTPAKIIEDAVERIRQQVGSDRVILGLSGGVDSSVTAMLLHRAIGDRLTCVFVDNGLLRLNEAEQVMDMFGDHFGLNIVHVPAEARFLDALAGENDPEAKRKIIGRVFVEVFDEEALKLTEVKWLAQGTIYPDVIESAASATGKAHVIKSHHNVGGLPKEMKMGLVEPLKELFKDEVRKIGLELGLPYDML…					-------------------------------------------MPLLDSFTVDHTIMGAPAVRVAKTMNTPHGDTITVFDLRFCRPNIDILTERGIHTLEHLFAGFMRNHLNGEGVEIVDISPMGCRTGFYMSLIGEPDEQRVAKAWKGAMEDVLKVKEQSQIPELNEYQCGSYKLHSLDEAQQIARNVLAHDIGVNRNEDLKLPADKLKELHIMKFKMNKNSLKLLLVSALLATSLPALALTGDSDKPVNIDSV					MLWFKNLMVYRLNRDIPLVADEMEKQLDVFSFTPCGSQDMAKTGWVSPLGARSEDLTHVTNGQILICARKEEKMLPSPVIKQALEAKISKLEAEQSRKLKKTEKDSLKDEVLHSLLPRAFSRFSQTYVWIDTVNNLIMVDCASAKKAEDTLALLRKSLGSLPVVPLTLESPIELTLTEWVRSGELPAGFALMDEAELEAILEDGGVIRCKKQDLVCDEIANHIEAGKLVTKLALDWQERVQLILSDDGSIKRLKFADILREQNDDIDREDVAGRFDADFVLMTGELAALISNTVEALGGEAPRMKFVDEATILVVAGDGGNGCVSFRREKYIPRGGPDGGDGGDGGDVYMQADENLNTLIDYRFEKSFRAERGQNGQSRDCTGKRGNDILIKVPVGTRI…					VKFVKYLLILAVCCILLGAGTVYGLYKYIEPQLPDVNTLKDVRLQTPMQVYSADGELIAQYGEKRRVPLTLQQMPPELIKAFIATEDSRFYEHHGVDPIGIFRAASIALMSGHASQGASTITQQLARNFFLSPERTLMRKIKEAFLAIRIEQLLSKDEILALYLNKIYLGYRAYGVGAAAQVYFGKSVDQLSLSEMAMIAGLPKAPSTFNPLYSHSRALARRNVVLARMLDQNYITQQQYTEARNTPLTASYHGPEIAFSAPYLSEMVRQEMVKRYGDRAYDDGYKVYTTVTRQLQEAAQQAVRNNVMAYDMRHGYRGPTNVLWKVGEASWDETRILNTLKNLPGYGPLNAAVVTSASADEATAMLKDGSSVSLTLAGVRWARPYKSDTLQGPTPRSIT…					MALTKAEMSEYLFEKLGLSKRDAKELVELFFEEVRRALENGEQVKLSGFGNFDLRDKNQRPGRNPKTGEDIPITARRVVTFRPGQKLKSRVENASPKDADMFTGIVQGTAEIVAIEEKELFRTHTVRLPAELLPGLALGASVAHNGCCLTVTAIDGDRVSFDLIKETLRITNLGELQVGDIVNIERAAKFSDEIGGHLMSGHIMTTAEICKIIQSENNREVWFKLQDAEQIKYILHKGFVGIDGISLTVGDVTKSKFCVHLIPETLERTTLGAKKLGHRVNIEIDPHTQAIVDTVERVLAQRDAAAALVAQTLPDAE------MSHQQPD--FDFQQAGKAVLRIEREGLEQLDQYINADFSRACEMIFACRGKVVVMGMGKSGHIGKKMAATFASTGT…					MQAQTIQRKVLRTICPDAKGLIAKITNICYKHELNIVQNNEFVDHRTGRFFMRTELEGIFNDNTLLADLDSALPTGSVRELQSAGRRRVVILVTKEAHCLGDLLMKSAFGGLDMEIAAVIGNHETLRSLVERFDIPFVLVSHEGHTREEHDNRMADEIDRYQPDYVVLAKYMRVLTPAFVQRYPNQIINIHHSFLPAFIGARPYHQAYERGVKIIGATAHYVNDNLDEGPIIMQDVINVDHSYTAEEMMRAGRDVEKNVLSRALYKVLGQRVFVYGNRTIILMIALIQRVSRASVSVDDATVGEIGNGLLVLLGVEKGDDEQKAQRLTERVLGYRIFADENDKMNLNVQQAGGSVLVVSQFTLAADTNKGMRPSFSGGAEPAEAERLYEYFSDCCRTQG…					-------------------MTITRIDP-EHRMSEAVVHDQTVYYTSVPENLDADAEAQTANALAVIDRILARVGSDKSKILDATIFLVEKEDFPAMNRAWDAWVSPGNAPVRCTVQAGLMNPKYKVEIKIIAALMIKRVFFALFIIILLVMATALGLDRWISWKTAPFIYEDVASLPHRQVGVVLGTAKYYRTGVYNQYYLYRIQGALNAYNSGKVNYLLLSGDNAQQSYNEPMTMRRDLIKAGVAPADIVLDYA					---------------------MAKEKKRGFFSWLGFGKEEQQPAEEQAQ---------QQPTDQPAPAAEES---ALASAEAQAAETVIVTEQVAEQQAES---------------------PVHADAEMHPVAEAETAAE---SDVNADDAETAAVSAIEEEVLPEDH----PQP-------EL----MPVEEEPQAEELIIEAPVLSEEPQ------------------------------------PEDA--					--MWKWLHQLAKPERLYNICGKCVPWFALAAVLTLFLGWIWGFGFAPADYQQGDSYRIMYIHVPAAMWSMGVYAWMAIAAFTGLVWQMKMSDLVAAAMAPIGAVFTFIALVTGSAWGKPMWGTWWIWDARLTSELVLLFIYMGVITLYNAFDDRRVAGRAAGILILVGVVNLPIIHYSVQWWNTLHQGSSGLLQQDIAPSMRTPLRWSILGYWLVFITLTLMRLRNLILLTERNRPWVSAI-ANKGRKSMAKTIK
>P_septica					>P_rodasii					>P_conspicua					>T_sp_NML_06					>P_septica					>P_sp_A4					>P_rodasii					>P_s_indologenes					>P_cypripedii					>E_pyrifoliae
MTTGGQTQIGNVDLVKQLNSAAVYRLIDQQGPISRIQIAELSQLAPASVTKITRQLIERGLIKEVDQQASTGGRRAISIVTETRHFHAIGVRLGRHDATLTLFDLSGKSLAQEDYALPERTQETLEHALFAAIDSFIDTHQRKIRELIAISVILPGLVDPINGVIRYMPHIAVSHWPLVAGLQHRFKVTSFVGHDIRSLALAEHYFGASRDCADSILVRLHRGTGAGIIANGHIFLGSNGNVGEIGHIQVDPLGERCHCGNFGCLETIAANGAIENRVRHLLSQGYPSVLTQDACQMAQICKAANQGDALACEVIEYVGRYLGKAIAIAINLFNPQKVVLAGEITDAEKVLFPAIEGCINTQALNAFRKNLPVVRSELDHRSAIGAFALAKRAMLNGIL…					MTTENIHKHRILILDFGSQYTQLVARRVRELGVYCELWAWDVTEEQIRGFNPNGIILSGGPESTTEHNSPRAPEYVFNAGVPVLGVCYGMQTMAMQLGGKVEGSNEREFGYAQVEVLTQSALVRDIEDAISAAGKPLLDVWMSHGDKVTAIPAGFETVASTETCPFAIMANEEKKFYGVQFHPEVTHTRQGLRMLERFIRDICGCEALWTPAKIIEDAVERLREQVGEDKVILGLSGGVDSSVTAMLLHRAIGDRLTCVFVDNGLLRLNEAEQVMDMFGDHFGLNIVHVAAEDRFLDALAGENDPEAKRKIIGRVFVEVFDQEALRLEDVKWLAQGTIYPDVIESAASATGKAHVIKSHHNVGGLPKEMKMGLVEPLKELFKDEVRKIGLELGLPYDML…					-------------------------------------------MPLLDSFTVDHTIMAAPAVRVAKTMKTPHGDTITVFDLRFCRPNIDILTERGIHTLEHLFAGFMRNHLNGDGVEIVDISPMGCRTGFYMSLIGTPDEQRVAKAWKGAMEDVLKVKDQNQIPELNEYQCGSYKLHSLEEAQQIARNVLAHEIGVNHNDDLKLPAEKLKELHIMKFKMNKNSLKFLLASMLLASSVPALALTGDSDKPVNIDSQ					MLWFKNMMVYRLNREIPLSAEDMEKQLSACSFTPCGSQDQSKTGWVSPLNDHSDSLLHVSQGQILLCARKEEKILPAPVIKQALEAKISHLEKEQQRKLKKTEKDSLKDEVIHTLLPRAFSRYSQTWLWIDPQHQLIMVDSASAKKAEDLLALLRKSLGSLPVVPLSLETPIELTLTEWVRSGTPAAGFALMDEAELKATLEEGGVIRCKKQELVSDEIAHHIEAGKRVTKLAVDWQERLQCVICDDGSVKRLKFSETVREQNDEIDREDQALRFDADFVLMTGELAAFTEALVEALGGEAQQMKFVDEATILVVAGDGGNGCVSFRREKYIPKGGPDGGDGGDGGDVWLVADENLNTLIDYRFEKAFRAERGQNGQSRDCTGKRGKDVVVKVPVGTRI…					------------------------LYKYIEPQLPDVNTLKDVRLQTPMQVYSADGELIAQYGEKRRIPLTLQQMPPELIKAFIATEDSRFYEHHGVDPVGIFRAASIALMSGHASQGASTITQQLARNFFLSPERTLMRKIKEAFLAIRIEQLLNKDEILELYLNKIYLGYRAYGVGAAAQVYFGKPVDQLSLSEMAMIAGLPKAPSTFNPLYSHSRALARRNVVLSRMLDQGYITQQQYDEARSAPLEASYHGP					MALTKAEMSEYLFEKLGLSKRDAKELVELFFEEVRRALENGEQVKLSGFGNFDLRDKNQRPGRNPKTGEDIPITARRVVTFRPGQKLKSRVENATPKETDMFTGIVQGTAKIVSIEEKELFRTHVAELPEELLPGLALGASVAHNGCCLTVTAIEGNRVSFDLIKETLRVTNLGDIQTGDVVNIERAAKFSDEIGGHLMSGHIMTTAEVCKIIQSENNREVWFKPLDASQMKYILHKGFVGIDGISLTVGDVTKTKFCVHLIPETLERTTLGSKKLGHRVNIEIDPHTQAIVETVERVLAQREAAALAAAQAAQDEQEEE---MTNHPLSPDFDFQHAGKTVLRIEREGLEQLDQYINEDFTAACQLIYGCTGKVVVMGMGKSGHIGRKMAATFASTGT…					MQAQNTQRKVLRTICPDAKGLIAKITNICYKHELNIVQNNEFVDHRTGRFFMRTELEGIFNDNTLLADLDSALPVGSVRELQSAGRRRVVILVTKEAHCLGDLLMKCAFGGLDMEISAVIGNHETLRSLVERFDIPFVLVSHEGLTREEHDNRMGDEIDRYQPDYVVLAKYMRVLTPAFVQRYPNQIINIHHSFLPAFIGARPYHQAYERGVKIIGATAHYVNDNLDEGPIIMQDVINVDHSYTAEEMMRAGRDVEKNVLSRALYKVLGQRVFVYGNRTIILMIALIQRVSRASVVVDDATVGEIGAGLLVLLGVEKGDDEQKAQRLSERVLGYRIFGDENDKMNLNVQQAGGSVLVVSQFTLAADTNKGMRPSFSGGAQPAEAERLYHYFSECCQAQG…					-------------------MSITRVDP-EHRMSEAVIHNDTIYYTSVPENLDADAEAQTANALAVIDALLTRVGSDKSKILDATIFLVDKADFAAMNRAWDAWVSPDNAPVRCTVQAGLMNPKYKVEIKIIAARMLKRVFIALLFIILTMVGTALGLDRWISWKTAPYIYDNLASLPHRQVGVVLGTAKYYRTGVINQYYLYRMQGALNAYNSGKINYLLLSGDNAQQSYNEPMTMRRDLIKGGVDPADIVLDYA					---------------------MAKEKKRGFFSWLGFGKEEETQQPAEDK--------QQPAEVAQEPAVEES---ALDRAEAQAEATVAVTEQVAEQQA-------------------------------EPVIAVVE-----------------------EEVVPVAI----AQP-------EV----APIEEQPEPEALA-----------------------------------------------------					--MWKWIHQLGKPERLYSLCGRFLPWFAVPGVAALLLGWAWGFGFAPPDYQQGNSYRIIYIHVPAAIWSMGIYASMAIAALIGLVWQWKTADLAAMAMAPVGAVLTFIALVTGSAWGKPMWGTWWIWDARLTSELVLLFLYMGAIALYHAVDDRRMAGRAAGILILVGVVNLPVIHYSVQWWNTLHQGSSGVLQQAIDPSMRMPLRWSILGYLLVLIALTLMRLRNLLLQAERHRPWVWELAAKGGRKIMAKTIK
>P_deleyi					>T_morbirosei					>P_ananatis					>T_ptyseos					>P_deleyi					>P_allii					>E_pyrifoliae					>P_eucrina					>E_tasmaniensis					>P_s_indologenes
[truncated: 39 more rows]

## Sheet: 80 genes
Supplementary File S7.5 Randomised gene subset datasets constructed with 80 genes
Dataset 1					Dataset 2					Dataset 3					Dataset 4					Dataset 5					Dataset 6					Dataset 7					Dataset 8					Dataset 9					Dataset 10
FILE	START POSITION SUPERMATRIX	END POSITION SUPERMATRIX			FILE	START POSITION SUPERMATRIX	END POSITION SUPERMATRIX			FILE	START POSITION SUPERMATRIX	END POSITION SUPERMATRIX			FILE	START POSITION SUPERMATRIX	END POSITION SUPERMATRIX			FILE	START POSITION SUPERMATRIX	END POSITION SUPERMATRIX			FILE	START POSITION SUPERMATRIX	END POSITION SUPERMATRIX			FILE	START POSITION SUPERMATRIX	END POSITION SUPERMATRIX			FILE	START POSITION SUPERMATRIX	END POSITION SUPERMATRIX			FILE	START POSITION SUPERMATRIX	END POSITION SUPERMATRIX			FILE	START POSITION SUPERMATRIX	END POSITION SUPERMATRIX
gene813	1	355			gene1196	1	140			gene803	1	319			gene610	1	363			gene21	1	236			gene317	1	251			gene23	1	91			gene1136	1	479			gene326	1	319			gene1038	1	251
gene1243	356	455			gene268	141	477			gene120	320	505			gene757	364	1007			gene659	237	448			gene572	252	578			gene1297	92	344			gene51	480	853			gene997	320	544			gene1162	252	403
gene365	456	614			gene9	478	726			gene810	506	962			gene355	1008	1493			gene7	449	659			gene997	579	803			gene201	345	527			gene1130	854	1065			gene298	545	663			gene1015	404	515
gene23	615	705			gene464	727	973			gene435	963	1250			gene678	1494	1636			gene942	660	937			gene1020	804	1075			gene1336	528	1106			gene1132	1066	1679			gene109	664	1277			gene461	516	691
gene342	706	1251			gene1263	974	1125			gene859	1251	1464			gene754	1637	2018			gene1117	938	1040			gene680	1076	1249			gene308	1107	1339			gene369	1680	2091			gene767	1278	1962			gene2	692	1177
gene273	1252	1705			gene455	1126	1517			gene1274	1465	1663			gene415	2019	2090			gene325	1041	2200			gene233	1250	1414			gene776	1340	1783			gene796	2092	2353			gene462	1963	2056			gene5	1178	1387
gene1133	1706	1966			gene214	1518	1894			gene397	1664	1981			gene296	2091	2961			gene980	2201	2367			gene373	1415	1855			gene86	1784	2214			gene1186	2354	2536			gene19	2057	2392			gene645	1388	1779
gene1309	1967	2153			gene459	1895	2450			gene602	1982	2437			gene392	2962	3420			gene11	2368	2824			gene1128	1856	2130			gene881	2215	2440			gene990	2537	2779			gene1350	2393	2548			gene661	1780	1971
gene1063	2154	2425			gene500	2451	2687			gene506	2438	3208			gene287	3421	3667			gene879	2825	2995			gene61	2131	2575			gene1153	2441	2620			gene428	2780	3064			gene155	2549	2902			gene1072	1972	2323
gene374	2426	2892			gene782	2688	2948			gene354	3209	3564			gene981	3668	3928			gene919	2996	3244			gene419	2576	2789			gene1237	2621	2704			gene489	3065	3341			gene537	2903	3085			gene127	2324	2646
gene1191	2893	3089			gene765	2949	3034			gene982	3565	3853			gene1117	3929	4031			gene255	3245	3575			gene446	2790	2945			gene1103	2705	2947			gene723	3342	3670			gene1118	3086	3343			gene319	2647	3096
gene484	3090	3437			gene510	3035	3359			gene147	3854	4057			gene146	4032	4156			gene326	3576	3894			gene1221	2946	3381			gene1334	2948	3313			gene45	3671	3827			gene98	3344	4199			gene1341	3097	3439
gene221	3438	3900			gene146	3360	3484			gene212	4058	4162			gene200	4157	4609			gene102	3895	4136			gene652	3382	3600			gene889	3314	3496			gene1166	3828	3925			gene553	4200	4368			gene888	3440	4156
[truncated: 124 more rows]

## Sheet: 90 genes
Supplementary File S7.6 Randomised gene subset datasets constructed with 90 genes
[truncated: 149 more rows]

## Sheet: 100 genes
Supplementary File S7.7 Randomised gene subset datasets constructed with 100 genes
[truncated: 186 more rows]

[truncated: 2 more sheets: 110 genes, 120 genes]
